# Supplementary material for: 2-Aroylindoles from o-bromochalcones via Cu(i)-catalyzed SNAr with an azide and intramolecular nitrene C–H insertion
Source: Royal Society of Chemistry journal article supplement (doi:10.1039/c4cc02501f), 2014-01-01
Supplement: c4cc02501f1.pdf [file c4cc02501f1.pdf]

## Supporting Information

### **2-Aroylindoles from *o*-bromochalcones via Cu (I)-catalyzed S<sub>N</sub>Ar with azide and intramolecular nitrene C–H insertion**

Yogesh Goriya and Chepuri V. Ramana\*

CSIR-National Chemical Laboratory, Dr. Homi Bhabha Road,  
Pune – 411 008 (India).

Email: [vr.chepuri@ncl.res.in](mailto:vr.chepuri@ncl.res.in)

|                                                                          |      |
|--------------------------------------------------------------------------|------|
| Table of content .....                                                   | SI 2 |
| General remarks .....                                                    | SI 5 |
| General Procedure for Preparation of chalcone.....                       | SI 5 |
| General Scheme for Preparation of <b>4c–4e</b> .....                     | SI 6 |
| General procedure for Cu (I)-catalyzed synthesis of 2-aroyl indole ..... | SI 6 |

| S. No | Compound                                                                                  | Data                         | Page No |
|-------|-------------------------------------------------------------------------------------------|------------------------------|---------|
| 1     | 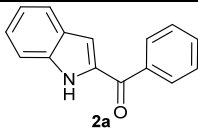<br>2a   | Characterization data        | SI 6    |
|       |                                                                                           | <sup>1</sup> H NMR Spectrum  | SI 16   |
|       |                                                                                           | <sup>13</sup> C NMR Spectrum | SI 17   |
|       |                                                                                           | DEPT Spectrum                | SI 18   |
| 2     | <br>2b   | Characterization data        | SI 6    |
|       |                                                                                           | <sup>1</sup> H NMR Spectrum  | SI 19   |
|       |                                                                                           | <sup>13</sup> C NMR Spectrum | SI 20   |
|       |                                                                                           | DEPT Spectrum                | SI 21   |
| 3     | <br>2c   | Characterization data        | SI 7    |
|       |                                                                                           | <sup>1</sup> H NMR Spectrum  | SI 23   |
|       |                                                                                           | <sup>13</sup> C NMR Spectrum | SI 24   |
|       |                                                                                           | DEPT Spectrum                | SI 25   |
| 4     | <br>2d   | Characterization data        | SI 7    |
|       |                                                                                           | <sup>1</sup> H NMR Spectrum  | SI 26   |
|       |                                                                                           | <sup>13</sup> C NMR Spectrum | SI 27   |
|       |                                                                                           | DEPT Spectrum                | SI 28   |
| 5     | <br>2e   | Characterization data        | SI 8    |
|       |                                                                                           | <sup>1</sup> H NMR Spectrum  | SI 30   |
|       |                                                                                           | <sup>13</sup> C NMR Spectrum | SI 31   |
|       |                                                                                           | DEPT Spectrum                | SI 32   |
| 6     | <br>2f  | Characterization data        | SI 8    |
|       |                                                                                           | <sup>1</sup> H NMR Spectrum  | SI 33   |
|       |                                                                                           | <sup>13</sup> C NMR Spectrum | SI 34   |
|       |                                                                                           | DEPT Spectrum                | SI 35   |
| 7     | <br>2g | Characterization data        | SI 8    |
|       |                                                                                           | <sup>1</sup> H NMR Spectrum  | SI 37   |
|       |                                                                                           | <sup>13</sup> C NMR Spectrum | SI 38   |
|       |                                                                                           | DEPT Spectrum                | SI 39   |
| 8     | <br>2h | Characterization data        | SI 9    |
|       |                                                                                           | <sup>1</sup> H NMR Spectrum  | SI 41   |
|       |                                                                                           | <sup>13</sup> C NMR Spectrum | SI 42   |
|       |                                                                                           | DEPT Spectrum                | SI 43   |
| 9     | <br>2i | Characterization data        | SI 9    |
|       |                                                                                           | <sup>1</sup> H NMR Spectrum  | SI 44   |
|       |                                                                                           | <sup>13</sup> C NMR Spectrum | SI 45   |
|       |                                                                                           | DEPT Spectrum                | SI 46   |
| 10    | <br>2j | Characterization data        | SI 9    |
|       |                                                                                           | <sup>1</sup> H NMR Spectrum  | SI 48   |
|       |                                                                                           | <sup>13</sup> C NMR Spectrum | SI 49   |
|       |                                                                                           | DEPT Spectrum                | SI 50   |
| 11    | <br>2k | Characterization data        | SI 10   |
|       |                                                                                           | <sup>1</sup> H NMR Spectrum  | SI 51   |
|       |                                                                                           | <sup>13</sup> C NMR Spectrum | SI 52   |
|       |                                                                                           | DEPT Spectrum                | SI 53   |
|       |                                                                                           | Mass Spectrum (HRMS)         | SI 54   |

| S. No | Compound                                                                            | Data                         | Page No |
|-------|-------------------------------------------------------------------------------------|------------------------------|---------|
| 12    | 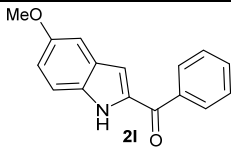   | Characterization data        | SI 10   |
|       |                                                                                     | <sup>1</sup> H NMR Spectrum  | SI 55   |
|       |                                                                                     | <sup>13</sup> C NMR Spectrum | SI 56   |
|       |                                                                                     | DEPT Spectrum                | SI 57   |
| 13    |    | Characterization data        | SI 10   |
|       |                                                                                     | <sup>1</sup> H NMR Spectrum  | SI 58   |
|       |                                                                                     | <sup>13</sup> C NMR Spectrum | SI 59   |
|       |                                                                                     | DEPT Spectrum                | SI 60   |
|       |                                                                                     | Mass Spectrum (HRMS)         | SI 61   |
| 14    |    | Characterization data        | SI 11   |
|       |                                                                                     | <sup>1</sup> H NMR Spectrum  | SI 62   |
|       |                                                                                     | <sup>13</sup> C NMR Spectrum | SI 63   |
|       |                                                                                     | DEPT Spectrum                | SI 64   |
|       |                                                                                     | Mass Spectrum (HRMS)         | SI 65   |
| 15    |    | Characterization data        | SI 11   |
|       |                                                                                     | <sup>1</sup> H NMR Spectrum  | SI 66   |
|       |                                                                                     | <sup>13</sup> C NMR Spectrum | SI 67   |
|       |                                                                                     | DEPT Spectrum                | SI 68   |
|       |                                                                                     | Mass Spectrum (HRMS)         | SI 69   |
| 16    |   | Characterization data        | SI 11   |
|       |                                                                                     | <sup>1</sup> H NMR Spectrum  | SI 70   |
|       |                                                                                     | <sup>13</sup> C NMR Spectrum | SI 71   |
|       |                                                                                     | DEPT Spectrum                | SI 72   |
| 17    |  | Characterization data        | SI 12   |
|       |                                                                                     | <sup>1</sup> H NMR Spectrum  | SI 73   |
|       |                                                                                     | <sup>13</sup> C NMR Spectrum | SI 74   |
|       |                                                                                     | DEPT Spectrum                | SI 75   |
|       |                                                                                     | Mass Spectrum (HRMS)         | SI 76   |
| 18    |  | Characterization data        | SI 12   |
|       |                                                                                     | <sup>1</sup> H NMR Spectrum  | SI 77   |
|       |                                                                                     | <sup>13</sup> C NMR Spectrum | SI 78   |
|       |                                                                                     | DEPT Spectrum                | SI 79   |
|       |                                                                                     | Mass Spectrum (HRMS)         | SI 80   |
| 19    |  | Characterization data        | SI 12   |
|       |                                                                                     | <sup>1</sup> H NMR Spectrum  | SI 81   |
|       |                                                                                     | <sup>13</sup> C NMR Spectrum | SI 82   |
|       |                                                                                     | DEPT Spectrum                | SI 83   |
| 20    |  | Characterization data        | SI 13   |
|       |                                                                                     | <sup>1</sup> H NMR Spectrum  | SI 84   |
|       |                                                                                     | <sup>13</sup> C NMR Spectrum | SI 85   |
|       |                                                                                     | DEPT Spectrum                | SI 86   |
|       |                                                                                     | Mass Spectrum (HRMS)         | SI 87   |
| 21    |  | Characterization data        | SI 13   |
|       |                                                                                     | <sup>1</sup> H NMR Spectrum  | SI 88   |
|       |                                                                                     | <sup>13</sup> C NMR Spectrum | SI 89   |
|       |                                                                                     | DEPT Spectrum                | SI 90   |

| S. No | Compound                                                                                 | Data                         | Page No |
|-------|------------------------------------------------------------------------------------------|------------------------------|---------|
| 22    | 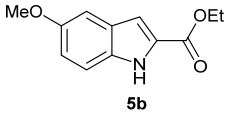<br>5b  | Characterization data        | SI 13   |
|       |                                                                                          | <sup>1</sup> H NMR Spectrum  | SI 91   |
|       |                                                                                          | <sup>13</sup> C NMR Spectrum | SI 92   |
|       |                                                                                          | DEPT Spectrum                | SI 93   |
|       |                                                                                          | Mass Spectrum (HRMS)         | SI 94   |
| 23    | <br>5c  | Characterization data        | SI 14   |
|       |                                                                                          | <sup>1</sup> H NMR Spectrum  | SI 95   |
|       |                                                                                          | <sup>13</sup> C NMR Spectrum | SI 96   |
| 24    | <br>5d  | Characterization data        | SI 14   |
|       |                                                                                          | <sup>1</sup> H NMR Spectrum  | SI 98   |
|       |                                                                                          | <sup>13</sup> C NMR Spectrum | SI 99   |
|       |                                                                                          | DEPT Spectrum                | SI 100  |
|       |                                                                                          | Mass Spectrum (HRMS)         | SI 101  |
| 25    | <br>5e  | Characterization data        | SI 14   |
|       |                                                                                          | <sup>1</sup> H NMR Spectrum  | SI 102  |
|       |                                                                                          | <sup>13</sup> C NMR Spectrum | SI 103  |
|       |                                                                                          | DEPT Spectrum                | SI 104  |
|       |                                                                                          | Mass Spectrum (HRMS)         | SI 105  |
| 26    | <br>3u | Characterization data        | SI 15   |
|       |                                                                                          | <sup>1</sup> H NMR Spectrum  | SI 106  |
|       |                                                                                          | <sup>13</sup> C NMR Spectrum | SI 107  |
|       |                                                                                          | DEPT Spectrum                | SI 108  |
| 27    | <br>7 | Characterization data        | SI 15   |
|       |                                                                                          | <sup>1</sup> H NMR Spectrum  | SI 109  |
|       |                                                                                          | <sup>13</sup> C NMR Spectrum | SI 110  |
|       |                                                                                          | DEPT Spectrum                | SI 111  |

## General Remarks

Reactions were carried out in anhydrous solvents under an atmosphere of argon in oven-dried glassware. Commercial reagents and solvents were used without purification. Column chromatography was carried out by using spectrochem silica gel (60–120, 100–200, 230–400 mesh).  $^1\text{H}$  and  $^{13}\text{C}$  NMR spectroscopy measurements were carried out on Bruker AC 200 MHz, Bruker DRX 400, DRX 500 MHz and JEOL 400 spectrometers, and TMS was used as an internal standard.  $^1\text{H}$  and  $^{13}\text{C}$  NMR chemical shifts are reported in ppm downfield from Chloroform-d ( $\delta = 7.25$ ) or TMS and coupling constants ( $J$ ) are reported in Hertz (Hz). The following abbreviations are used to designate signal multiplicity: s = singlet, d = doublet, t = triplet, q = quartet, m = multiplet, b = broad. The Multiplicity of  $^{13}\text{C}$  NMR signals was assigned with the help of DEPT spectra and the abbreviations used: s = singlet d = doublet t = triplet q = quartet, represent C (quaternary), CH,  $\text{CH}_2$  and  $\text{CH}_3$  respectively. Mass spectroscopy was carried out on PI QStar Pulsar (Hybrid Quadrupole-TOF LC/MS/MS) and 4800 plus MALDI TOF/TOF Applied Biosystem spectrometer or UPLC coupled Mass Spectrometer (Waters). HRMS mass spectra were recorded on a Thermo Scientific Q-Exactive, Accela 1250 pump.

### General Procedure for Preparation of chalcone:

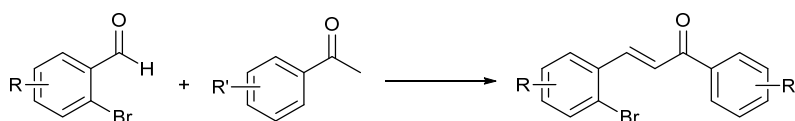

Compounds **1a–1t** was prepared according to literature procedure.<sup>1</sup> Aqueous NaOH (2.5 N, 1 mL) was added drop-wise to a mixture of 2-bromobenzaldehyde (2.7 mmol), acetophenone (2.7 mmol) in ethanol (4 mL) at ambient temperature. After stirring overnight, the reaction mixture was poured into brine solution (20 mL) and extracted with  $\text{CH}_2\text{Cl}_2$  (20 mL). The extract was washed with water ( $2 \times 30$  mL), dried over  $\text{Na}_2\text{SO}_4$ , and evaporated under

<sup>1</sup> M. Shen, B. E. Leslie and T. G. Driver, *Angew. Chem. Int. Ed.*, 2008, **47**, 5056.

reduced pressure. The crude was purified over silica gel (ethyl acetate and pet ether as eluent) to give the product. Yields were not optimized.

### **General Scheme for Preparation of 4c–4e:<sup>2</sup>**

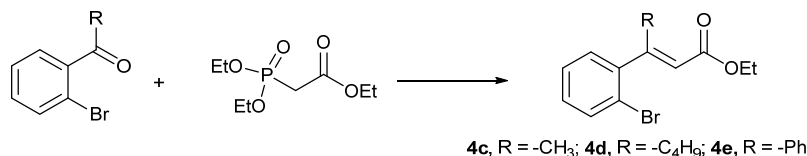

### **General procedure for Cu(I)-catalyzed synthesis of 2-aryl indole:**

To a solution of *o*-bromo-chalcone (1.0 mmol) in NMP (1 mL), were added L-proline (0.2 mmol), K<sub>2</sub>CO<sub>3</sub> (4.0 mmol), CuI (0.2 mmol), and NaN<sub>3</sub> (1.2 mmol). The mixture was stirred at 110 °C. After 15h the reaction mixture was cooled and diluted with 30 mL of water and extracted with ethyl acetate (3 X 30 mL). Combined organic layer was dried (Na<sub>2</sub>SO<sub>4</sub>) and evaporated under reduced pressure. The crude was purified over silica gel (ethyl acetate and pet ether as eluent) provided 2-aryl indole in moderate to good yields.

#### **(1*H*-Indol-2-yl)(phenyl)methanone (2a)<sup>3</sup>**

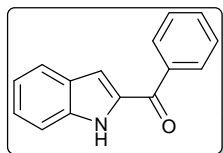

Light yellow solid; 76% Yield; *R<sub>f</sub>* 0.3 (10% ethyl acetate/pet. ether); <sup>1</sup>H

NMR (200 MHz, CDCl<sub>3</sub>): δ 7.16 (s, 1H), 7.16 (dt, *J* = 1.0, 7.0 Hz, 1H),

7.37 (ddd, *J* = 1.0, 6.8, 8.4 Hz, 1H), 7.45–7.62 (m, 4H), 7.71 (d, *J* = 8.0

Hz, 1H), 7.96–8.01 (m, 2H), 9.27 (br s, 1H); <sup>13</sup>C NMR (100 MHz, CDCl<sub>3</sub>): δ 112.2 (d), 112.9 (d), 121.0 (d), 123.2 (d), 126.5 (d), 127.7 (s), 128.5 (d, 2C), 129.2 (d, 2C), 132.4 (d), 134.3 (s), 137.5 (s), 138.0 (s), 187.2 (s) ppm.

#### **(1*H*-Indol-2-yl)(2-methoxy-4-methylphenyl) methanone (2b)**

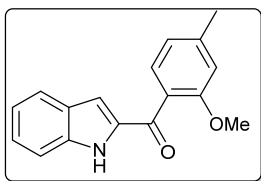

Brown solid; 59% Yield; *R<sub>f</sub>* 0.2 (10% ethyl acetate/pet. ether); mp:

112–113 °C; <sup>1</sup>H NMR (200 MHz, CDCl<sub>3</sub>): δ 2.43 (s, 3H), 3.82 (s, 3H),

<sup>2</sup> M. Gallant, M. Belley, M.-C. Carriere, A. Chateauneuf, D. Denis, N. Lachance, S. Lamontagne, K. M. Metters, N. Sawyer, D. Slipetz, J. F. Truchon and M. Labelle, *Bioorg. Med. Chem. Lett.*, 2003, **13**, 3813

<sup>3</sup> W.-C. Gao, S. Jiang, R.-L. Wang and C. Zhang, *Chem. Commun.*, 2013, **49**, 4890.

6.84 (s, 1H), 6.86 (d,  $J = 6.8$  Hz, 1H), 6.93 (d,  $J = 1.8$  Hz, 1H), 7.12 (ddd,  $J = 0.9, 6.9, 7.9$  Hz, 1H), 7.29–7.37 (m, 1H), 7.42–7.48 (m, 2H), 7.64 (d,  $J = 8.0$  Hz, 1H), 9.43 (s, 1H);  $^{13}\text{C}$  NMR (50 MHz,  $\text{CDCl}_3$ ):  $\delta$  21.9 (q), 55.7 (q), 112.2 (d), 112.5 (d), 112.8 (d), 120.7 (d), 120.8 (d), 123.1 (d), 125.4 (s), 126.3 (d), 127.6 (s), 130.0 (d), 135.9 (s), 137.7 (s), 142.8 (s), 157.6 (s), 187.1 (s) ppm; HRMS (ESI+): calcd. for  $\text{C}_{17}\text{H}_{15}\text{O}_2\text{NNa} = 288.0995$ , found 288.0995.

**(5-Bromo-2-methoxyphenyl)(1H-Indol-2-yl)methanone (2c)<sup>4</sup>:**

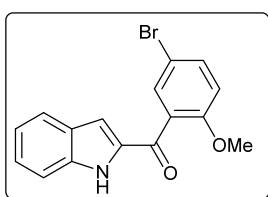

Brown solid; 67% Yield;  $R_f$  0.5 (15% ethyl acetate/pet. ether);  $^1\text{H}$  NMR (200 MHz,  $\text{CDCl}_3$ ):  $\delta$  3.80 (s, 3H), 6.91 (m, 2H), 7.14 (ddd,  $J = 1.1, 6.8, 8.0$  Hz, 1H), 7.36 (ddd,  $J = 1.0, 6.8, 7.9$  Hz, 1H), 7.44–7.48 (m, 1H), 7.55–7.60 (m, 2H), 7.66 (br d,  $J = 8.2$  Hz, 1H), 9.37 (s, 1H);  $^{13}\text{C}$  NMR (125 MHz,  $\text{CDCl}_3$ ):  $\delta$  56.0 (q), 112.7 (2C, s and d), 113.4 (d), 113.6 (d), 121.1 (d), 123.3 (d), 126.8 (d), 127.5 (s), 129.8 (s), 132.0 (d), 134.5 (d), 135.2 (s), 137.9 (s), 156.5 (s), 185.4 (s) ppm.

**(1H-Indol-2-yl)(naphthalen-1-yl)methanone (2d):-**

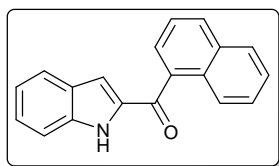

Yellow solid; 77% Yield;  $R_f$  0.3 (10% ethyl acetate/pet. ether); mp: 150–151 °C;  $^1\text{H}$  NMR (400 MHz,  $\text{CDCl}_3$ ):  $\delta$  6.97 (d,  $J = 1.0$  Hz, 1H), 7.15 (t,  $J = 6.0$  Hz, 1H), 7.38 (ddd,  $J = 0.8, 7.0, 8.0$  Hz, 1H), 7.50–7.59 (m, 4H), 7.65 (d,  $J = 8.0$  Hz, 1H), 7.88–7.95 (m, 2H), 8.04 (d,  $J = 8.3$  Hz, 1H), 8.28–8.30 (m, 1H), 9.62 (s, 1H);  $^{13}\text{C}$  NMR (100 MHz,  $\text{CDCl}_3$ ):  $\delta$  112.3 (d), 113.7 (d), 121.1 (d), 123.3 (d), 124.3 (d), 125.5 (d), 126.5 (d), 126.8 (d), 127.3 (d), 127.6 (s), 127.8 (d), 128.4 (d), 130.8 (s), 131.5 (d), 133.8 (s), 135.6 (s), 136.0 (s), 137.9 (s), 188.8 (s) ppm; HRMS (ESI+): calcd. for  $\text{C}_{19}\text{H}_{13}\text{ONNa} = 294.0889$ , found 294.0890.

<sup>4</sup> Y. Miki, Y. Tsuzaki, C. Kai and H. Hachiken, *Heterocycles*, 2002, **57**, 1635

**Furan-2-yl(1H-Indol-2-yl)methanone (2e)<sup>3</sup>:**

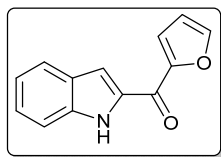

Brown solid; 76% Yield;  $R_f$  0.5 (10% ethyl acetate/pet. ether);  $^1\text{H}$  NMR (200 MHz,  $\text{CDCl}_3$ ):  $\delta$  6.63–6.64 (m, 1H), 7.71 (t,  $J = 7.6$  Hz, 3H), 7.37 (t,  $J = 7.7$  Hz, 1H), 7.45–7.47 (m, 2H), 7.72 (br d,  $J = 8.6$  Hz, 2H), 7.76 (d,  $J = 1.0$  Hz, 1H), 9.44 (s, 1H);  $^{13}\text{C}$  NMR (50 MHz,  $\text{CDCl}_3$ ):  $\delta$  111.5 (d), 112.1 (d), 112.5 (d), 118.6 (d), 121.0 (d), 123.3 (d), 126.5 (d), 128.0 (s), 133.4 (s), 137.2 (s), 146.5 (d), 152.7 (s), 172.6 (s) ppm.

**(1H-Indol-2-yl)(1-methyl-1H-pyrrol-2-yl) methanone (2f):-**

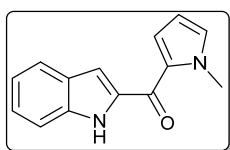

Brown solid; 49% Yield;  $R_f$  0.2 (10% ethyl acetate/pet. ether); mp: 100–101 °C;  $^1\text{H}$  NMR (500 MHz,  $\text{CDCl}_3$ ):  $\delta$  4.02 (s, 3H), 6.23 (dd,  $J = 2.7$ , 3.8 Hz, 1H), 6.94 (br s, 1H), 7.16 (t,  $J = 7.6$  Hz, 1H), 7.20 (dd,  $J = 1.4$ , 3.9 Hz, 1H), 7.23 (s, 1H), 7.33 (t,  $J = 7.6$  Hz, 1H), 7.45 (d,  $J = 8.3$  Hz, 1H), 7.72 (d,  $J = 8.0$  Hz, 1H), 9.37 (s, 1H);  $^{13}\text{C}$  NMR (125 MHz,  $\text{CDCl}_3$ ):  $\delta$  37.0 (q), 108.5 (d), 109.7 (d), 111.9 (d), 120.7 (d, 2C), 122.9 (d), 125.5 (d), 127.8 (s), 130.3 (s), 131.2 (d), 135.6 (s), 136.9 (s), 176.3 (s) ppm; HRMS (ESI+): calcd. for  $\text{C}_{14}\text{H}_{12}\text{ON}_2\text{H}^+$  = 225.1022, found 225.1021.

**(1H-Indol-2-yl)(pyridin-2-yl)methanone (2g):-**

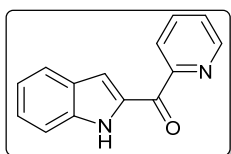

Yellow solid; 57% Yield;  $R_f$  0.2 (10% ethyl acetate/pet. ether); mp: 130–131 °C;  $^1\text{H}$  NMR (400 MHz,  $\text{CDCl}_3$ ):  $\delta$  7.15 (t,  $J = 7.5$  Hz, 1H), 7.36 (ddd,  $J = 0.5$ , 6.9, 7.9 Hz, 1H), 7.48–7.55 (m, 2H), 7.75 (d,  $J = 8.0$  Hz, 1H), 7.84 (s, 1H), 7.93 (dt,  $J = 1.5$ , 7.8 Hz, 1H), 8.28 (d,  $J = 8.0$  Hz, 1H), 8.81 (d,  $J = 4.3$  Hz, 1H), 10.84 (s, 1H);  $^{13}\text{C}$  NMR (100 MHz,  $\text{CDCl}_3$ ):  $\delta$  112.4 (d), 113.3 (d), 120.8 (d), 123.3 (d), 124.2 (d), 126.3 (d), 126.7 (d), 127.4 (s), 135.0 (s), 137.4 (d), 137.7 (s), 148.5 (d), 155.0 (s), 181.2 (s) ppm; HRMS (ESI+): calcd. for  $\text{C}_{14}\text{H}_{10}\text{ON}_2\text{Na}$  = 245.0685, found 245.0688.



### Benzofuran-2-yl(1*H*-Indol-2-yl)methanone (**2h**)<sup>5</sup>:

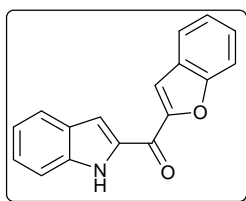

Yellow solid; 78% Yield;  $R_f$  0.4 (10% ethyl acetate/pet. ether);  $^1\text{H}$  NMR (500 MHz,  $\text{CDCl}_3$ ):  $\delta$  7.20 (t,  $J = 7.5$  Hz, 1H), 7.36 (t,  $J = 7.6$  Hz, 1H), 7.40 (t,  $J = 7.6$  Hz, 1H), 7.48 (d,  $J = 8.2$  Hz, 1H), 7.53 (t,  $J = 7.8$  Hz, 1H), 7.69 (d,  $J = 8.4$  Hz, 1H), 7.77 (d,  $J = 7.9$  Hz, 1H), 7.78 (s, 1H), 7.81 (d,  $J = 8.1$  Hz, 1H), 7.88 (br s, 1H), 9.33 (s, 1H);  $^{13}\text{C}$  NMR (125 MHz,  $\text{CDCl}_3$ ):  $\delta$  112.1 (d), 112.3 (d), 112.4 (d), 114.3 (d), 121.2 (d), 123.2 (d), 123.6 (d), 124.0 (d), 126.9 (d), 127.1 (s), 128.0 (s), 128.2 (d), 133.7 (s), 137.5 (s), 152.9 (s), 155.9 (s), 174.0 (s) ppm.

### Benzo[*b*]thiophen-3-yl(1*H*-Indol-2-yl)methanone (**2i**):-

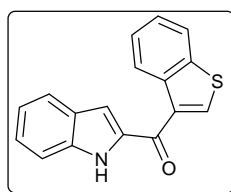

Light brown solid; 69% Yield;  $R_f$  0.4 (10% ethyl acetate/pet. ether); mp: 187–188 °C;  $^1\text{H}$  NMR (500 MHz,  $\text{CDCl}_3$ ):  $\delta$  7.18 (t,  $J = 6.7$  Hz, 1H), 7.25 (s, 1H), 7.38 (t,  $J = 6.6$  Hz, 1H), 7.45–7.51 (m, 3H), 7.74 (d,  $J = 7.3$ , 1H), 7.93 (d,  $J = 7.3$  Hz, 1H), 8.36 (s, 1H), 8.50 (d,  $J = 7.3$  Hz, 1H), 9.52 (s, 1H);  $^{13}\text{C}$  NMR (125 MHz,  $\text{CDCl}_3$ ):  $\delta$  111.6 (d), 112.2 (d), 121.1 (d), 122.4 (d), 123.2 (d), 124.7 (d), 125.5 (d), 125.6 (d), 126.5 (d), 127.7 (s), 134.7 (s), 135.5 (2C, s and d), 137.2 (s), 137.6 (s), 140.0 (s), 181.2 (s) ppm; HRMS (ESI+): calcd. for  $\text{C}_{17}\text{H}_{11}\text{ONSH}^+$  = 278.0634, found 278.0634.

### 1-(1*H*-Indol-2-yl)pentan-1-one (**2j**)<sup>6</sup>:

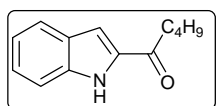

Brown solid; 47% Yield;  $R_f$  0.3 (10% ethyl acetate/pet. ether);  $^1\text{H}$  NMR (500 MHz,  $\text{CDCl}_3$ ):  $\delta$  0.96 (t,  $J = 7.4$  Hz, 3H), 1.39–1.46 (m, 2H), 1.73–1.79 (m, 2H), 2.94 (t,  $J = 7.6$  Hz, 2H), 7.15 (t,  $J = 7.5$  Hz, 1H), 7.20 (s, 1H), 7.34 (t,  $J = 7.6$  Hz, 1H), 7.42 (d,  $J = 8.3$  Hz, 1H), 7.70 (d,  $J = 8.1$  Hz, 1H), 9.09 (s, 1H);  $^{13}\text{C}$  NMR (125

<sup>5</sup> S. Mahboobi, A. Uecker, C. Cenac, A. Sellmer, E. Eichhorn, S. Elz, F.-D. Bohmer and S. Dove, *Bioorg. Med. Chem.*, 2007, **15**, 2187.

<sup>6</sup> P. C. Too, S. H. Chua, S. H. Wong and S. Chiba, *J. Org. Chem.*, 2011, **76**, 6159.

MHz, CDCl<sub>3</sub>):  $\delta$  13.9 (q), 22.5 (t), 27.3 (t), 38.1 (t), 109.0 (d), 112.1 (d), 120.9 (d), 123.0 (d), 126.2 (d), 127.6 (s), 135.2 (s), 137.2 (s), 193.6 (s) ppm.

**Cyclopropyl (1*H*-Indol-2-yl) methanone (2k):-**

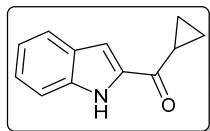

Brown solid; 46% Yield; *R<sub>f</sub>* 0.5 (10% ethyl acetate/pet. ether); mp: 143–145 °C; <sup>1</sup>H NMR (200 MHz, CDCl<sub>3</sub>):  $\delta$  1.02–1.11 (m, 2H), 1.25–1.32 (m, 2H), 2.59–2.71 (m, 1H), 7.11–7.19 (m, 1H), 7.30–7.45 (m, 3H), 7.73 (dd, *J* = 0.5, 8.1 Hz, 1H), 9.24 (s, 1H); <sup>13</sup>C NMR (125 MHz, CDCl<sub>3</sub>):  $\delta$  11.4 (t, 2C), 17.5 (d), 109.1 (d), 112.2 (d), 120.8 (d), 122.9 (d), 126.1 (d), 127.6 (s), 135.8 (s), 137.3 (s), 192.9 (s) ppm; HRMS (ESI+): calcd. for C<sub>12</sub>H<sub>11</sub>ONH<sup>+</sup> = 186.0913, found 186.0916.

**(5-Methoxy-1*H*-Indol-2-yl)(phenyl)methanone (2l)<sup>7</sup>:-**

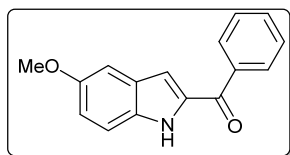

Yellow solid; 74% Yield; *R<sub>f</sub>* 0.3 (10% ethyl acetate/pet. ether); <sup>1</sup>H NMR (200 MHz, CDCl<sub>3</sub>):  $\delta$  3.84 (s, 3H), 7.02–7.08 (m, 3H), 7.37–7.41 (m, 1H), 7.49–7.63 (m, 3H), 7.69–8.01 (m, 2H), 9.52 (s, 1H); <sup>13</sup>C NMR (100 MHz, CDCl<sub>3</sub>):  $\delta$  55.6 (q), 102.6 (d), 112.5 (d), 113.3 (d), 118.4 (d), 127.9 (s), 128.4 (d, 2C), 129.2 (d, 2C), 132.2 (d), 133.3 (s), 134.7 (s), 138.1 (s), 154.7 (s), 187.1 (s) ppm.

**(5-Chloro-1*H*-Indol-2-yl)(phenyl)methanone (2m):-**

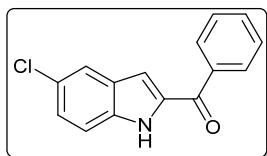

Light yellow solid; 74% Yield; *R<sub>f</sub>* 0.3 (10% ethyl acetate/pet. ether); mp: 198–200 °C; <sup>1</sup>H NMR (400 MHz, CDCl<sub>3</sub>):  $\delta$  7.08–7.09 (m, 1H), 7.32 (dd, *J* = 1.9, 8.8 Hz, 1H), 7.42 (d, *J* = 8.8 Hz, 1H), 7.52–7.56 (m, 2H), 7.61–7.65 (m, 1H), 7.68 (br s, 1H), 7.97–7.99 (m, 2H), 9.47 (s, 1H); <sup>13</sup>C NMR (100 MHz, CDCl<sub>3</sub>):  $\delta$  111.7 (d), 113.3 (d), 122.3 (d), 126.6 (s), 127.0 (d), 128.6 (d, 2C and s, 1C), 129.2 (d, 2C), 132.6 (d), 135.3 (s), 135.7 (s), 137.6 (s), 187.0 (s) ppm; HRMS (ESI+): calcd. for C<sub>15</sub>H<sub>10</sub>ONClH<sup>+</sup> = 256.0524, found 256.0522.

<sup>7</sup> S. Mahboobi, S. Teller, H. Pongratz, H. Hufsky, A. Sellmer, A. Botzki, A. Uecker, T. Beckers, S. Baasner, C. Schachtele, F. Uberall, M. U. Kassack, S. Dove and F.-D. Bohmer, *J. Med. Chem.*, 2002, **45**, 1002.

**(6-Bromo-5-methoxy-1*H*-Indol-2-yl)(phenyl)methanone (2n):-**

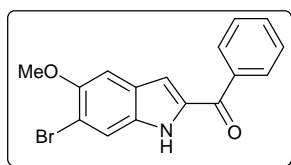

Yellow solid; 59% Yield;  $R_f$  0.2 (10% ethyl acetate/pet. ether); mp: 177–178 °C;  $^1\text{H}$  NMR (200 MHz,  $\text{CDCl}_3$ ):  $\delta$  3.92 (s, 3H), 7.06 (s, 1H), 7.11 (s, 1H), 7.52 (d,  $J = 7.6$  Hz, 1H), 7.54 (d,  $J = 7.7$  Hz, 1H), 7.63 (t,  $J = 7.3$  Hz, 1H), 7.71 (s, 1H), 7.96 (s, 1H), 7.98 (s, 1H), 9.42 (s, 1H);  $^{13}\text{C}$  NMR (125 MHz,  $\text{CDCl}_3$ ):  $\delta$  56.6 (q), 103.3 (d), 112.1 (d), 113.3 (s), 116.8 (d), 127.3 (s), 128.5 (d, 2C), 129.2 (d, 2C), 132.5 (d), 133.0 (s), 135.1 (s), 137.8 (s), 151.0 (s), 186.9 (s) ppm; HRMS (ESI+): calcd. for  $\text{C}_{16}\text{H}_{12}\text{O}_2\text{NBrH}^+ = 330.0124$ , found 330.0132.

**(5-Bromo-2-methoxyphenyl)(5-methoxy-1*H*-Indol-2-yl)methanone (2o):-**

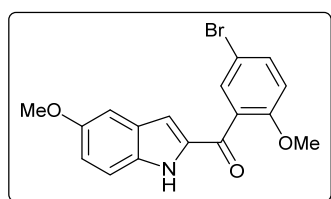

Yellow solid; 68% Yield;  $R_f$  0.4 (15% ethyl acetate/pet. ether); mp: 168–170 °C;  $^1\text{H}$  NMR (200 MHz,  $\text{CDCl}_3$ ):  $\delta$  3.80 (s, 3H), 3.82 (s, 3H), 6.84 (s, 1H), 6.91 (d,  $J = 8.7$  Hz, 1H), 7.03–7.05 (m, 2H), 7.35 (d,  $J = 8.8$  Hz, 1H), 7.56–7.59 (m, 2H), 9.20 (s, 1H);  $^{13}\text{C}$  NMR (125 MHz,  $\text{CDCl}_3$ ):  $\delta$  55.6 (q), 56.1 (q), 102.8 (d), 112.3 (s), 113.0 (d), 113.2 (d), 113.4 (d), 118.9 (d), 127.9 (s), 129.9 (s), 132.1 (d), 133.4 (s), 134.4 (d), 135.6 (s), 154.8 (s), 156.5 (s), 185.0 (s) ppm; HRMS (ESI+): calcd. for  $\text{C}_{17}\text{H}_{14}\text{O}_3\text{NBrH}^+ = 360.0230$ , found 360.0234.

**(5-Methoxy-1*H*-Indol-2-yl)(naphthalen-1-yl)methanone (2p)<sup>7</sup>:-**

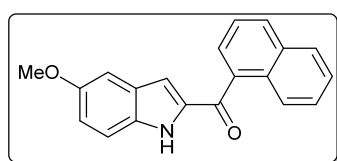

Brown solid; 73% Yield;  $R_f$  0.3 (10% ethyl acetate/pet. ether);  $^1\text{H}$  NMR (400 MHz,  $\text{CDCl}_3$ ):  $\delta$  3.82 (s, 3H), 6.87 (s, 1H), 7.01 (s, 1H), 7.06 (dd,  $J = 1.9, 8.9$  Hz, 1H), 7.40 (d,  $J = 9.0$  Hz, 1H), 7.52–7.57 (m, 3H), 7.87 (d,  $J = 7.1$  Hz, 1H), 7.92–7.94 (m, 1H), 8.04 (d,  $J = 8.3$  Hz, 1H), 8.27–8.28 (m, 1H), 9.54 (s, 1H);  $^{13}\text{C}$  NMR (100 MHz,  $\text{CDCl}_3$ ):  $\delta$  55.6 (q), 102.8 (d), 113.2 (d), 113.3 (d), 118.7 (d), 124.3 (d), 125.5 (d), 126.5 (d), 127.3 (d), 127.7 (d), 127.9 (s), 128.4 (d), 130.8 (s), 131.5 (d), 133.5 (s), 133.8 (s), 135.7 (s), 136.4 (s), 154.8 (s), 188.5 (s) ppm.

**(5-Methoxy-1*H*-Indol-2-yl)(2-methoxy-4-methylphenyl)methanone (2q):-**

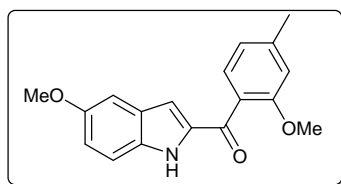

Grey solid; 64% Yield;  $R_f$  0.3 (15% ethyl acetate/pet. ether); mp: 94–95 °C;  $^1\text{H}$  NMR (500 MHz,  $\text{CDCl}_3$ ):  $\delta$  2.43 (s, 3H), 3.82 (s, 6H), 6.83–6.85 (m, 3H), 7.01–7.03 (m, 2H), 7.34 (d,  $J = 9.7$  Hz, 1H), 7.42 (d,  $J = 7.5$  Hz, 1H), 9.17 (s, 1H);  $^{13}\text{C}$  NMR (125 MHz,  $\text{CDCl}_3$ ):  $\delta$  21.9 (q), 55.7 (q), 55.8 (q), 102.8 (d), 112.2 (d), 112.5 (d), 113.1 (d), 118.1 (d), 120.6 (d), 125.4 (s), 128.0 (s), 130.0 (d), 133.1 (s), 136.4 (s), 142.8 (s), 154.7 (s), 157.6 (s), 186.8 (s) ppm; HRMS (ESI+): calcd. for  $\text{C}_{18}\text{H}_{17}\text{O}_3\text{NNa} = 318.1101$ , found 318.1101.

**Benzo[*b*]thiophen-3-yl(5-methoxy-1*H*-Indol-2-yl)methanone (2r):-**

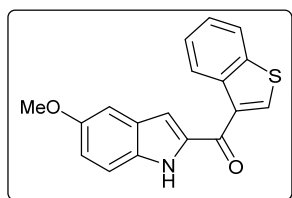

Light yellow solid; 52% Yield;  $R_f$  0.3 (10% ethyl acetate/pet. ether); mp: 198–199 °C;  $^1\text{H}$  NMR (500 MHz,  $\text{CDCl}_3$ ):  $\delta$  3.85 (s, 3H), 7.06 (dd,  $J = 2.4, 8.9$  Hz, 1H), 7.10 (br d,  $J = 1.8$  Hz, 1H), 7.15 (br d,  $J = 1.3$  Hz, 1H), 7.39 (d,  $J = 8.9$  Hz, 1H), 7.46 (br t,  $J = 7.5$  Hz, 1H), 7.51 (br t,  $J = 7.6$  Hz, 1H), 7.93 (d,  $J = 7.9$  Hz, 1H), 8.33 (s, 1H), 8.47 (d,  $J = 8.1$  Hz, 1H), 9.27 (s, 1H);  $^{13}\text{C}$  NMR (125 MHz,  $\text{CDCl}_3$ ):  $\delta$  55.7 (q), 102.8 (d), 111.1 (d), 113.1 (d), 118.3 (d), 122.4 (d), 124.7 (d), 125.5 (d), 125.6 (d), 128.0 (s), 133.0 (s), 134.7 (s), 135.2 (d), 135.9 (s), 137.3 (s), 140.0 (s), 154.9 (s), 180.0 (s) ppm; HRMS (ESI+): calcd. for  $\text{C}_{18}\text{H}_{13}\text{O}_2\text{NSH}^+ = 308.0740$ , found 308.0741.

**Phenyl(5,6,7-trimethoxy-1*H*-Indol-2-yl)methanone (2s)<sup>8</sup>:-**

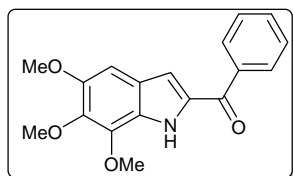

Light yellow solid; 72% Yield;  $R_f$  0.3 (15% ethyl acetate/pet. ether);  $^1\text{H}$  NMR (500 MHz,  $\text{CDCl}_3$ ):  $\delta$  3.89 (s, 3H), 3.94 (s, 3H), 4.08 (s, 3H), 6.82 (s, 1H), 7.03 (d,  $J = 2.1$  Hz, 1H), 7.50 (d,  $J = 7.5$  Hz, 1H), 7.52 (d,  $J = 7.7$  Hz, 1H), 7.58–7.61 (m, 1H), 7.94 (d,  $J = 7.4$  Hz, 2H), 9.29 (s, 1H);  $^{13}\text{C}$  NMR (125 MHz,  $\text{CDCl}_3$ ):  $\delta$  56.2 (q), 61.1 (q), 61.5 (q), 98.0 (d), 112.8 (d), 123.4 (s), 127.6 (s),

<sup>8</sup> M. Arthuis, R. Pontikis, G. G. Chabot, L. Quentin, D. Scherman and J.-C. Florent, *Eur. J. Med. Chem.*, 2011, **46**, 95.

128.4 (d, 2C), 129.1 (d, 2C), 132.1 (d), 134.2 (s), 138.2 (s), 138.9 (s), 141.6 (s), 150.4 (s), 186.4 (s) ppm.

**Naphthalen-1-yl(5,6,7-trimethoxy-1H-Indol-2-yl)methanone (2t):-**

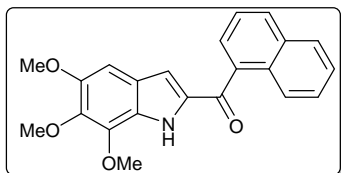

Yellow solid; 79% Yield;  $R_f$  0.4 (20% ethyl acetate/pet. ether);

mp: 148–149 °C;  $^1\text{H}$  NMR (400 MHz,  $\text{CDCl}_3$ ):  $\delta$  3.85 (s, 3H),

3.95 (s, 3H), 4.10 (s, 3H), 6.75 (s, 1H), 6.82 (d,  $J = 2.2$  Hz, 1H),

7.52–7.56 (m, 3H), 7.83 (br d,  $J = 7.1$  Hz, 1H), 7.91–7.93 (m, 1H), 8.02 (d,  $J = 8.2$  Hz, 1H),

8.23–8.26 (m, 1H), 9.41 (s, 1H);  $^{13}\text{C}$  NMR (100 MHz,  $\text{CDCl}_3$ ):  $\delta$  56.2 (q), 61.2 (q), 61.5 (q),

98.0 (d), 113.7 (d), 123.2 (s), 124.3 (d), 125.5 (d), 126.5 (d), 127.2 (d), 127.5 (d), 128.0 (s),

128.3 (d), 130.8 (s), 131.3 (d), 133.7 (s), 135.8 (s, 2C), 138.9 (s), 141.7 (s), 150.4 (s), 187.9

(s) ppm; HRMS (ESI+): calcd. for  $\text{C}_{22}\text{H}_{19}\text{O}_4\text{NH}^+$  = 362.1387, found 362.1390.

**Ethyl 1H-Indole-2-carboxylate (5a)<sup>9</sup>:**

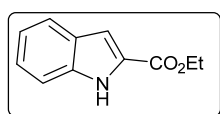

Brown solid; 57% Yield,  $R_f$  0.4 (10% ethyl acetate/pet. ether);  $^1\text{H}$  NMR

(500 MHz,  $\text{CDCl}_3$ ):  $\delta$  1.42 (t,  $J = 7.1$  Hz, 3H), 4.41 (q,  $J = 7.0$  Hz, 2H),

7.15 (t,  $J = 7.5$  Hz, 1H), 7.23 (s, 1H), 7.32 (t,  $J = 7.7$  Hz, 1H), 7.42 (d,  $J = 8.3$  Hz, 1H), 7.69

(d,  $J = 8.0$  Hz, 1H), 9.0 (s, 1H);  $^{13}\text{C}$  NMR (125 MHz,  $\text{CDCl}_3$ ):  $\delta$  14.4 (q), 61.0 (t), 108.6 (d),

111.8 (d), 120.8 (d), 122.6 (d), 125.3 (d), 127.5 (s, 2C), 136.8 (s), 162.0 (s) ppm.

**Ethyl 5-methoxy-1H-Indole-2-carboxylate (5b):-**

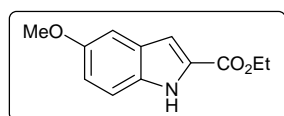

Brown solid; 67% Yield;  $R_f$  0.3 (10% ethyl acetate/pet. ether);  $^1\text{H}$

NMR (500 MHz,  $\text{CDCl}_3$ ):  $\delta$  1.41 (t,  $J = 7.1$  Hz, 3H), 3.84 (s, 3H),

4.40 (q,  $J = 7.1$  Hz, 2H), 6.99 (dd,  $J = 2.3, 9.0$  Hz, 1H), 7.07 (d,  $J = 1.5$  Hz, 1H), 7.14 (s, 1H),

7.31 (d,  $J = 9.0$  Hz, 1H), 8.90 (s, 1H);  $^{13}\text{C}$  NMR (125 MHz,  $\text{CDCl}_3$ ):  $\delta$  14.4 (q), 55.7 (q), 61.0

(t), 102.5 (d), 108.2 (d), 112.7 (d), 116.9 (d), 127.8 (s), 127.9 (s), 132.1 (s), 154.7 (s), 161.9

(s) ppm; HRMS (ESI+): calcd. for  $\text{C}_{12}\text{H}_{13}\text{O}_3\text{NNa}$  = 242.0788, found 242.0788.

<sup>9</sup> Q. Cai, Z. Li, J. Wei, C. Ha, D. Pei and K. Ding, *Chem. Commun.*, 2009, 7581.

### Ethyl 3-methyl-1H-Indole-2-carboxylate (5c)<sup>9</sup>:-

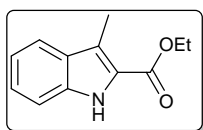

Light yellow solid; 74% Yield;  $R_f$  0.3 (10% ethyl acetate/pet. ether);  $^1\text{H}$  NMR (500 MHz,  $\text{CDCl}_3$ ):  $\delta$  1.43 (t,  $J = 7.1$  Hz, 3H), 2.61 (s, 3H), 4.42 (q,  $J = 7.1$  Hz, 2H), 7.14 (t,  $J = 7.4$  Hz, 1H), 7.32 (t,  $J = 7.5$  Hz, 1H), 7.36 (d,  $J = 8.2$  Hz, 1H), 7.66 (d,  $J = 8.1$  Hz, 1H), 8.72 (s, 1H);  $^{13}\text{C}$  NMR (125 MHz,  $\text{CDCl}_3$ ):  $\delta$  9.9 (q), 14.5 (q), 60.7 (t), 111.6 (d), 119.9 (d), 120.2 (s), 120.8 (d), 123.4 (s), 125.5 (d), 128.5 (s), 135.8 (s), 162.7 (s) ppm.

### Ethyl 3-butyl-1H-Indole-2-carboxylate (5d):-

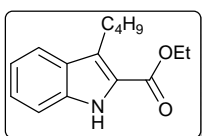

Off white solid; 59% Yield;  $R_f$  0.4 (15% ethyl acetate/pet. ether); mp: 71–74 °C;  $^1\text{H}$  NMR (500 MHz,  $\text{CDCl}_3$ ):  $\delta$  0.94 (t,  $J = 7.3$  Hz, 3H), 1.39–1.44 (m, 5H), 1.63–1.69 (m, 2H), 3.10 (t,  $J = 7.7$  Hz, 2H), 4.41 (q,  $J = 7.1$  Hz, 2H), 7.13 (t,  $J = 7.5$  Hz, 1H), 7.31 (t,  $J = 7.6$  Hz, 1H), 7.37 (d,  $J = 8.24$  Hz, 1H), 7.68 (d,  $J = 8.24$  Hz, 1H), 8.73 (s, 1H);  $^{13}\text{C}$  NMR (125 MHz,  $\text{CDCl}_3$ ):  $\delta$  14.0 (q), 14.4 (q), 22.8 (t), 24.5 (t), 33.2 (t), 60.6 (t), 111.7 (d), 119.8 (d), 120.9 (d), 123.0 (s), 125.4 (d and s), 128.1 (s), 135.9 (s), 162.5 (s) ppm; HRMS (ESI+): calcd. for  $\text{C}_{15}\text{H}_{19}\text{O}_2\text{NH}^+$  = 246.1489, found 246.1491.

### Ethyl 3-phenyl-1H-Indole-2-carboxylate (5e):-

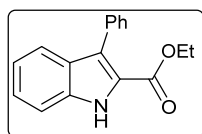

Yellow solid; 61% Yield;  $R_f$  0.4 (15% ethyl acetate/pet. ether); mp: 137–139 °C;  $^1\text{H}$  NMR (200 MHz,  $\text{CDCl}_3$ ):  $\delta$  1.23 (t,  $J = 7.1$  Hz, 3H), 4.29 (q,  $J = 7.1$  Hz, 2H), 7.11–7.18 (m, 1H), 7.32–7.49 (m, 5H), 7.52–7.58 (m, 2H), 7.63 (d,  $J = 8.3$  Hz, 1H), 9.01 (s, 1H);  $^{13}\text{C}$  NMR (50 MHz,  $\text{CDCl}_3$ ):  $\delta$  14.0 (q), 60.9 (t), 111.7 (d), 120.9 (d), 121.8 (d), 122.8 (s), 124.3 (s), 125.8 (d), 127.2 (d), 127.7 (d, 2C), 127.9 (s), 130.6 (d, 2C), 133.5 (s), 135.7 (s), 162.0 (s) ppm; HRMS (ESI+): calcd. for  $\text{C}_{17}\text{H}_{15}\text{O}_2\text{NNa}$  = 288.0995, found 288.0997.

### 3-Methyl-2-phenylquinoline (3u)<sup>10</sup>:-

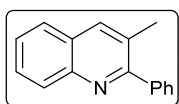

Colorless oil; 29% Yield;  $R_f$  0.4 (10% ethyl acetate/pet. ether);  $^1\text{H}$  NMR (500 MHz,  $\text{CDCl}_3$ ):  $\delta$  2.46 (s, 3H), 7.41–7.53 (m, 4H), 7.58–7.60 (m, 2H), 7.63–7.68 (m, 1H), 7.77 (d,  $J = 8.2$  Hz, 1H), 8.01 (s, 1H), 8.13 (d,  $J = 8.5$  Hz, 1H);  $^{13}\text{C}$  NMR (125 MHz,  $\text{CDCl}_3$ ):  $\delta$  20.6 (q), 126.4 (d), 126.7 (d), 127.6 (s), 128.2 (d), 128.3 (d, 2C), 128.7 (d), 128.8 (d, 2C), 129.2 (s), 129.3 (d), 136.7 (d), 140.8 (s), 146.6 (s), 160.5 (s) ppm.

### (E)-3-(2-Aminophenyl)-2-methyl-1-phenylprop-2-en-1-one (7):-

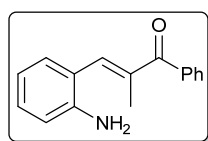

Yellow Liquid; 42% Yield;  $R_f$  0.2 (15% ethyl acetate/pet. ether);  $^1\text{H}$  NMR (200 MHz,  $\text{CDCl}_3$ ):  $\delta$  2.16 (d,  $J = 1.4$  Hz, 3H), 3.63 (s, 2H), 6.71 (dd,  $J = 0.9, 8.1$  Hz, 1H), 6.81 (dt,  $J = 0.9, 7.6$  Hz, 1H), 7.09–7.25 (m, 3H), 7.40–7.54 (m, 3H), 7.73–7.77 (m, 2H);  $^{13}\text{C}$  NMR (100 MHz,  $\text{CDCl}_3$ ):  $\delta$  14.4 (q), 115.7 (d), 118.3 (d), 121.2 (s), 128.2 (d, 2C), 129.4 (d, 2C), 129.6 (d), 129.7 (d), 131.8 (d), 138.1 (s), 138.2 (d), 138.5 (s), 144.3 (s), 199.2 (s) ppm.

<sup>10</sup> I. Hyodo, M. Tobisu and N. Chatani, *Chem. Asian J.*, 2012, **7**, 1357.

|                        |                                              |                      |           |                        |                     |                       |                |
|------------------------|----------------------------------------------|----------------------|-----------|------------------------|---------------------|-----------------------|----------------|
| Acquisition Time (sec) | 7.9167                                       | Comment              | yogesh    | Date                   | 18/06/2013 05:27:24 | Original Points Count | 32768          |
| File Name              | F:\yogesh\Indole metho\NMR\ym-936\HNMR B.ESP | Spectrum Offset (Hz) | 1225.1484 | Frequency (MHz)        | 200.13              | Nucleus               | <sup>1</sup> H |
| Points Count           | 32768                                        | Sweep Width (Hz)     | 4139.07   | Temperature (degree C) | 0.000               |                       |                |

HNMR B.ESP

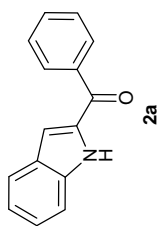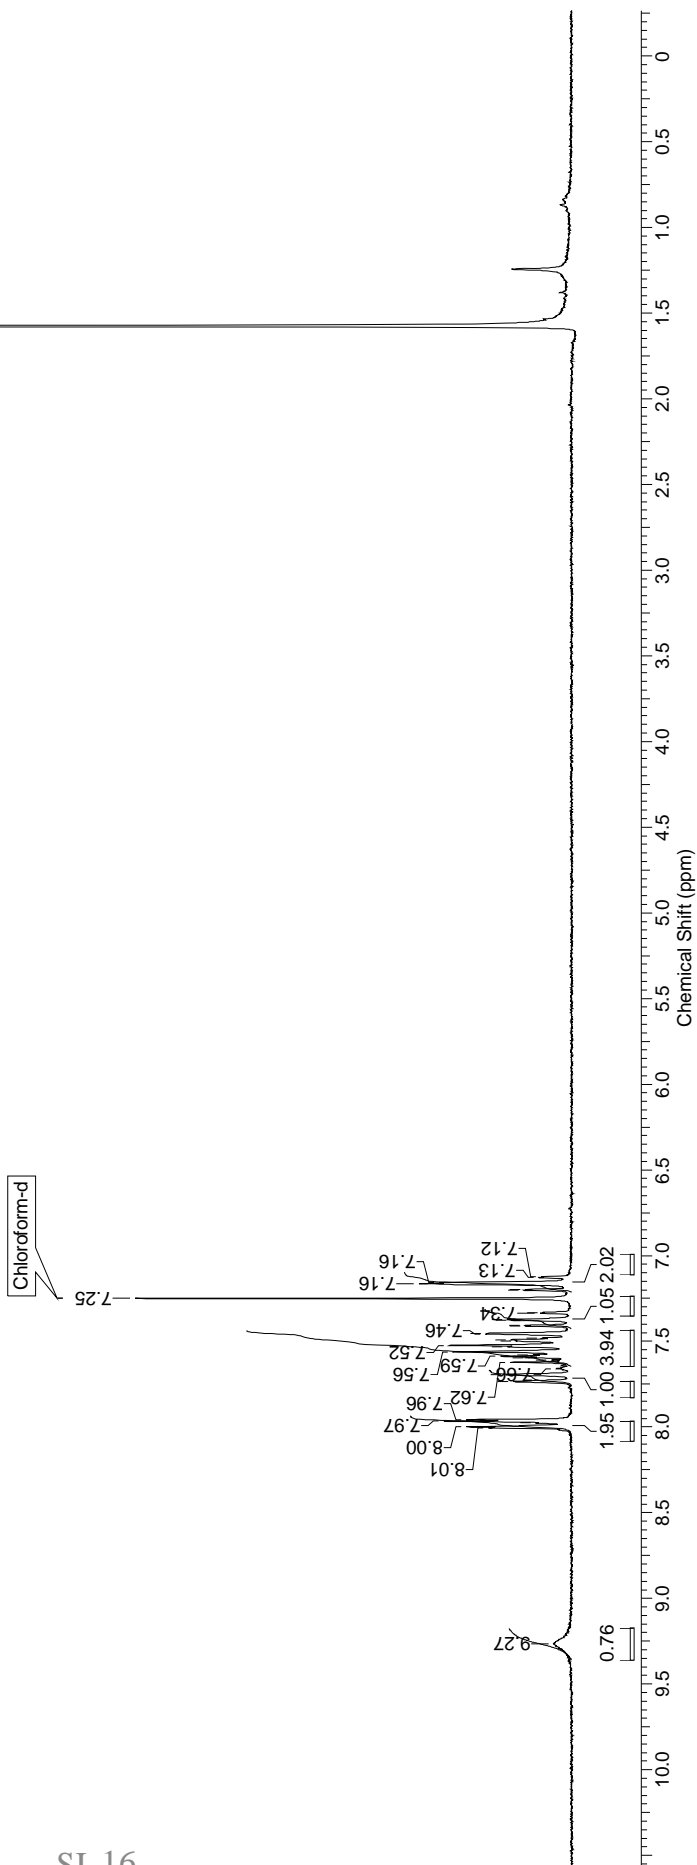



|                               |                      |                         |                                                                      |                               |                      |
|-------------------------------|----------------------|-------------------------|----------------------------------------------------------------------|-------------------------------|----------------------|
| <b>Acquisition Time (sec)</b> | 1.0434               | <b>Comment</b>          | yogesh                                                               | <b>Date</b>                   | 20 Jun 2013 02:58:30 |
| <b>Date Stamp</b>             | 20 Jun 2013 02:05:46 | <b>File Name</b>        | \\lagn\mntm_data\JEOL_400\2013\June 2013\Wad4ECX400#053_CARBON-3.jdf |                               |                      |
| <b>Frequency (MHz)</b>        | 100.53               | <b>Nucleus</b>          | <sup>13</sup> C                                                      | <b>Origin</b>                 | ECX 400              |
| <b>Original Points Count</b>  | 26214                | <b>Owner</b>            | delta                                                                | <b>Pulse Sequence</b>         | single_pulse_dec     |
| <b>Receiver Gain</b>          | 60.00                | <b>Solvent</b>          | CHLOROFORM-d                                                         | <b>Spectrum Offset (Hz)</b>   | 10040.2900           |
| <b>Spectrum Type</b>          | STANDARD             | <b>Sweep Width (Hz)</b> | 25124.29                                                             | <b>Temperature (degree C)</b> | 19.200               |

CNMR B.ESP

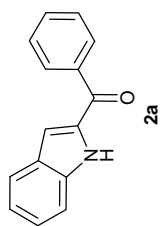

CHLOROFORM-d

76.69  
77.00  
77.31

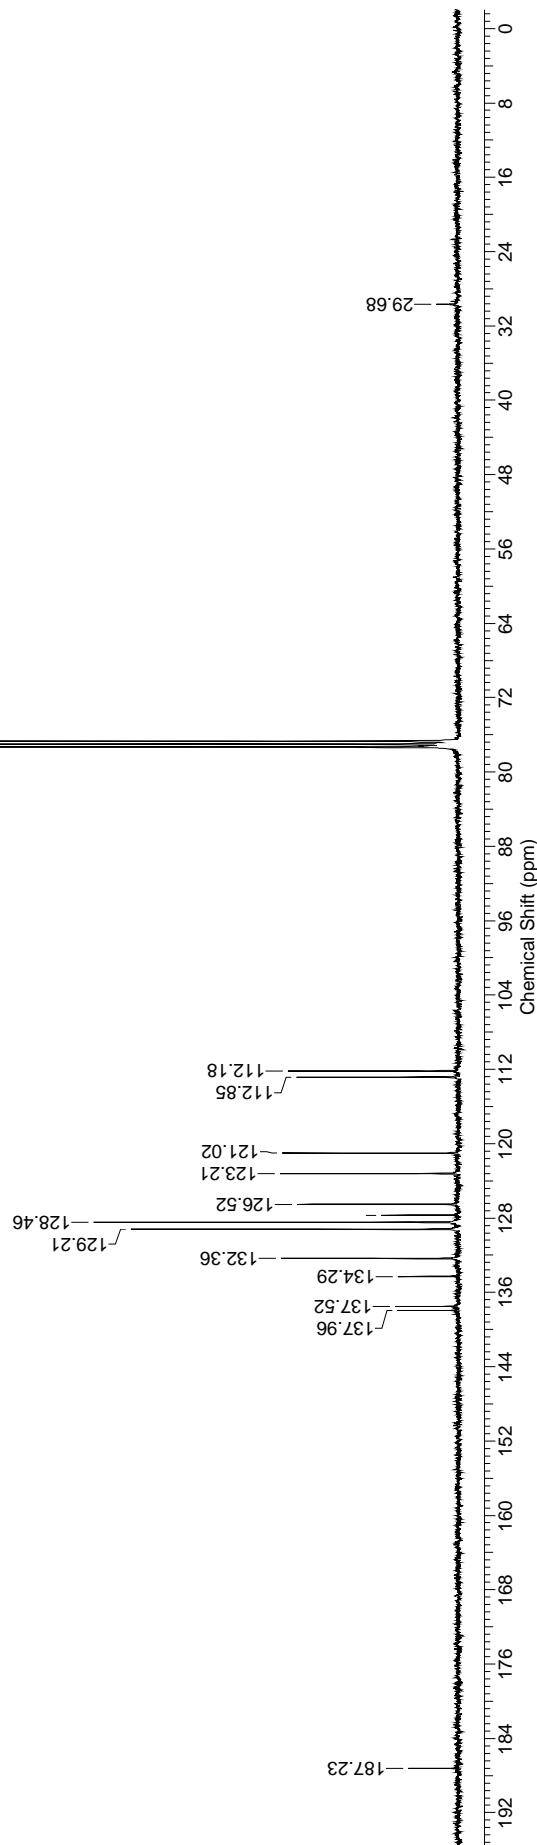

|                               |                      |                         |              |                               |                                                                      |
|-------------------------------|----------------------|-------------------------|--------------|-------------------------------|----------------------------------------------------------------------|
| <b>Acquisition Time (sec)</b> | 1.0434               | <b>Comment</b>          | yogesh       | <b>Date</b>                   | 20 Jun 2013 02:58:30                                                 |
| <b>Date Stamp</b>             | 20 Jun 2013 02:37:03 | <b>Nucleus</b>          | 13C          | <b>File Name</b>              | \\agn1\nmr_data\JEOL_400\2013\June 2013\Wed4ECX400#053_DEPT135-3.jdf |
| <b>Frequency (MHz)</b>        | 100.53               | <b>Owner</b>            | delta        | <b>Number of Transients</b>   | 800                                                                  |
| <b>Original Points Count</b>  | 26214                | <b>Solvent</b>          | CHLOROFORM-d | <b>Points Count</b>           | 26214                                                                |
| <b>Receiver Gain</b>          | 60.00                | <b>Sweep Width (Hz)</b> | 25124.29     | <b>Pulse Sequence</b>         | dept.ex2 (selection_angle=135)                                       |
| <b>Spectrum Type</b>          | DEPT135              |                         |              | <b>Spectrum Offset (Hz)</b>   | 10040.0273                                                           |
|                               |                      |                         |              | <b>Temperature (degree C)</b> | 19.100                                                               |

DEPT B.ESP

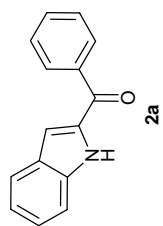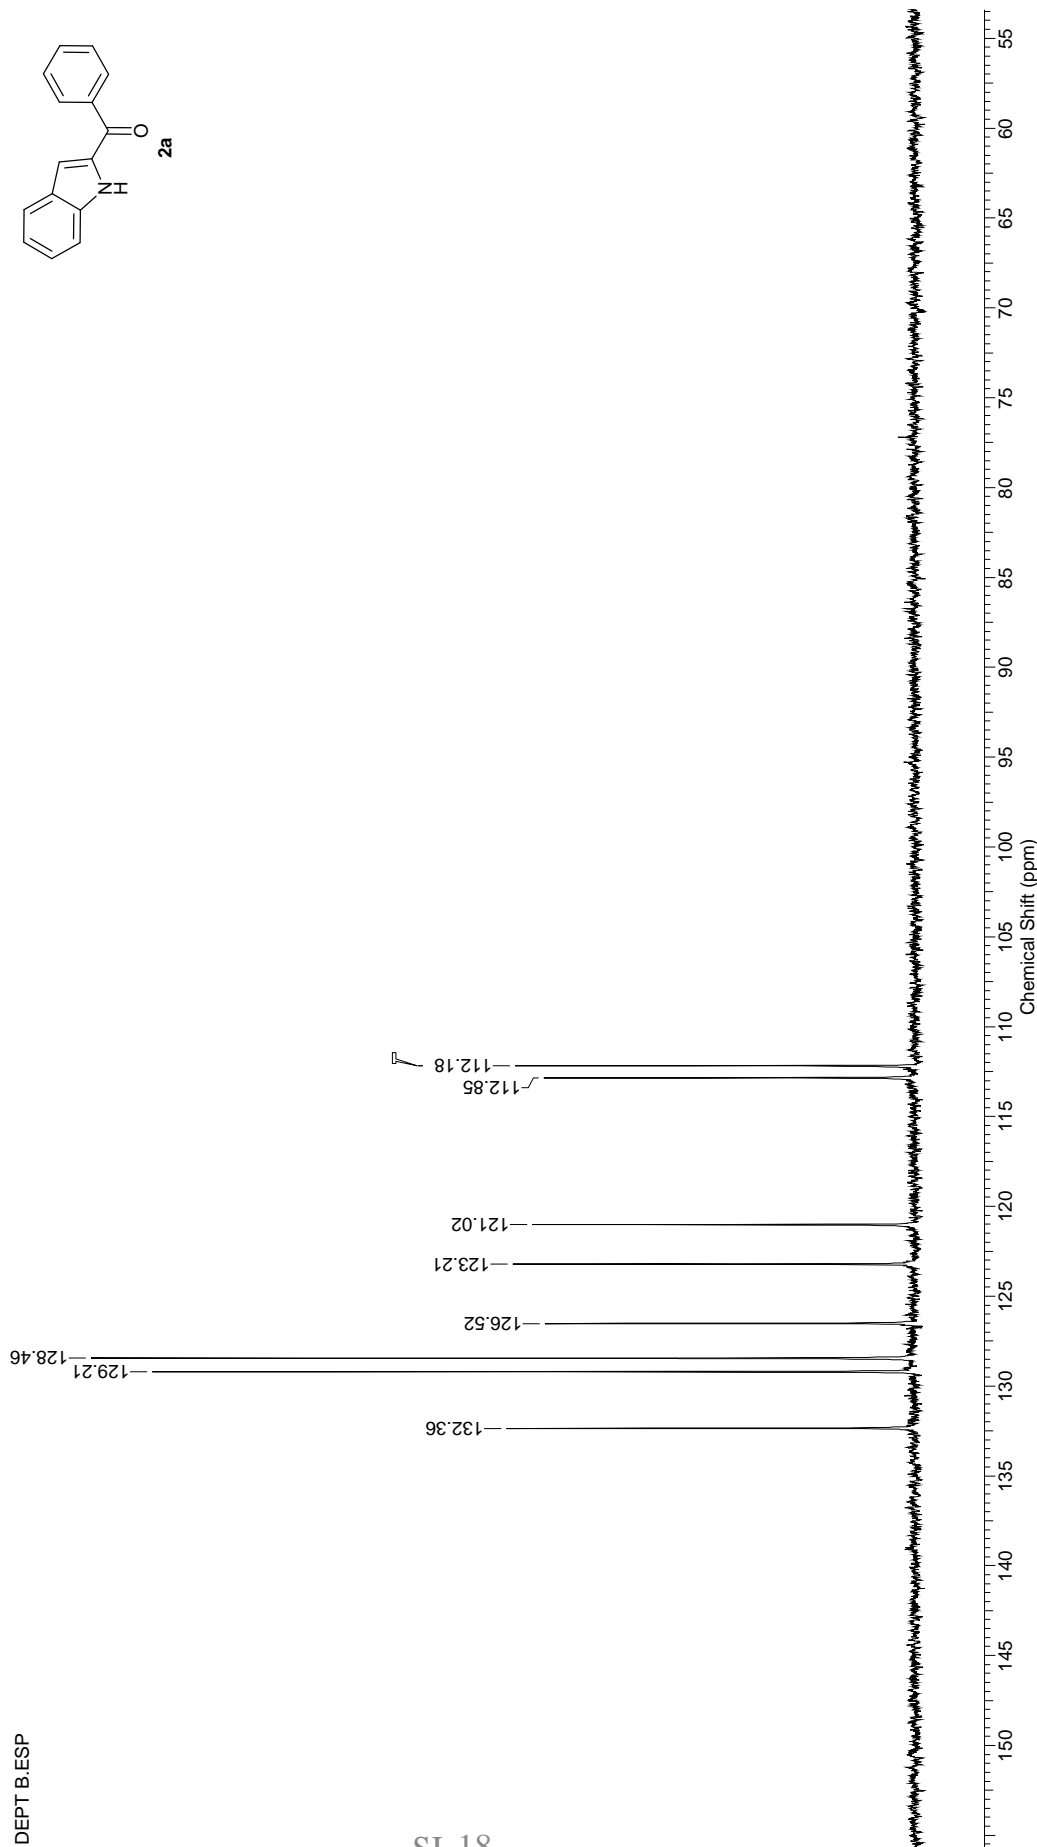

|                        |                                            |                      |           |                  |                     |                        |                |
|------------------------|--------------------------------------------|----------------------|-----------|------------------|---------------------|------------------------|----------------|
| Acquisition Time (sec) | 7.9167                                     | Comment              | Yogesh    | Date             | 12/07/2013 22:57:18 | Original Points Count  | 32768          |
| File Name              | F:\yogesh\Indole metho\NMR\vm-953\HNMR.ESP |                      |           | Frequency (MHz)  | 200.13              | Nucleus                | <sup>1</sup> H |
| Points Count           | 32768                                      | Spectrum Offset (Hz) | 1225.4011 | Sweep Width (Hz) | 4139.07             | Temperature (degree C) | 0.000          |

HNMR.ESP

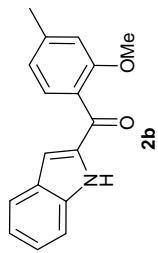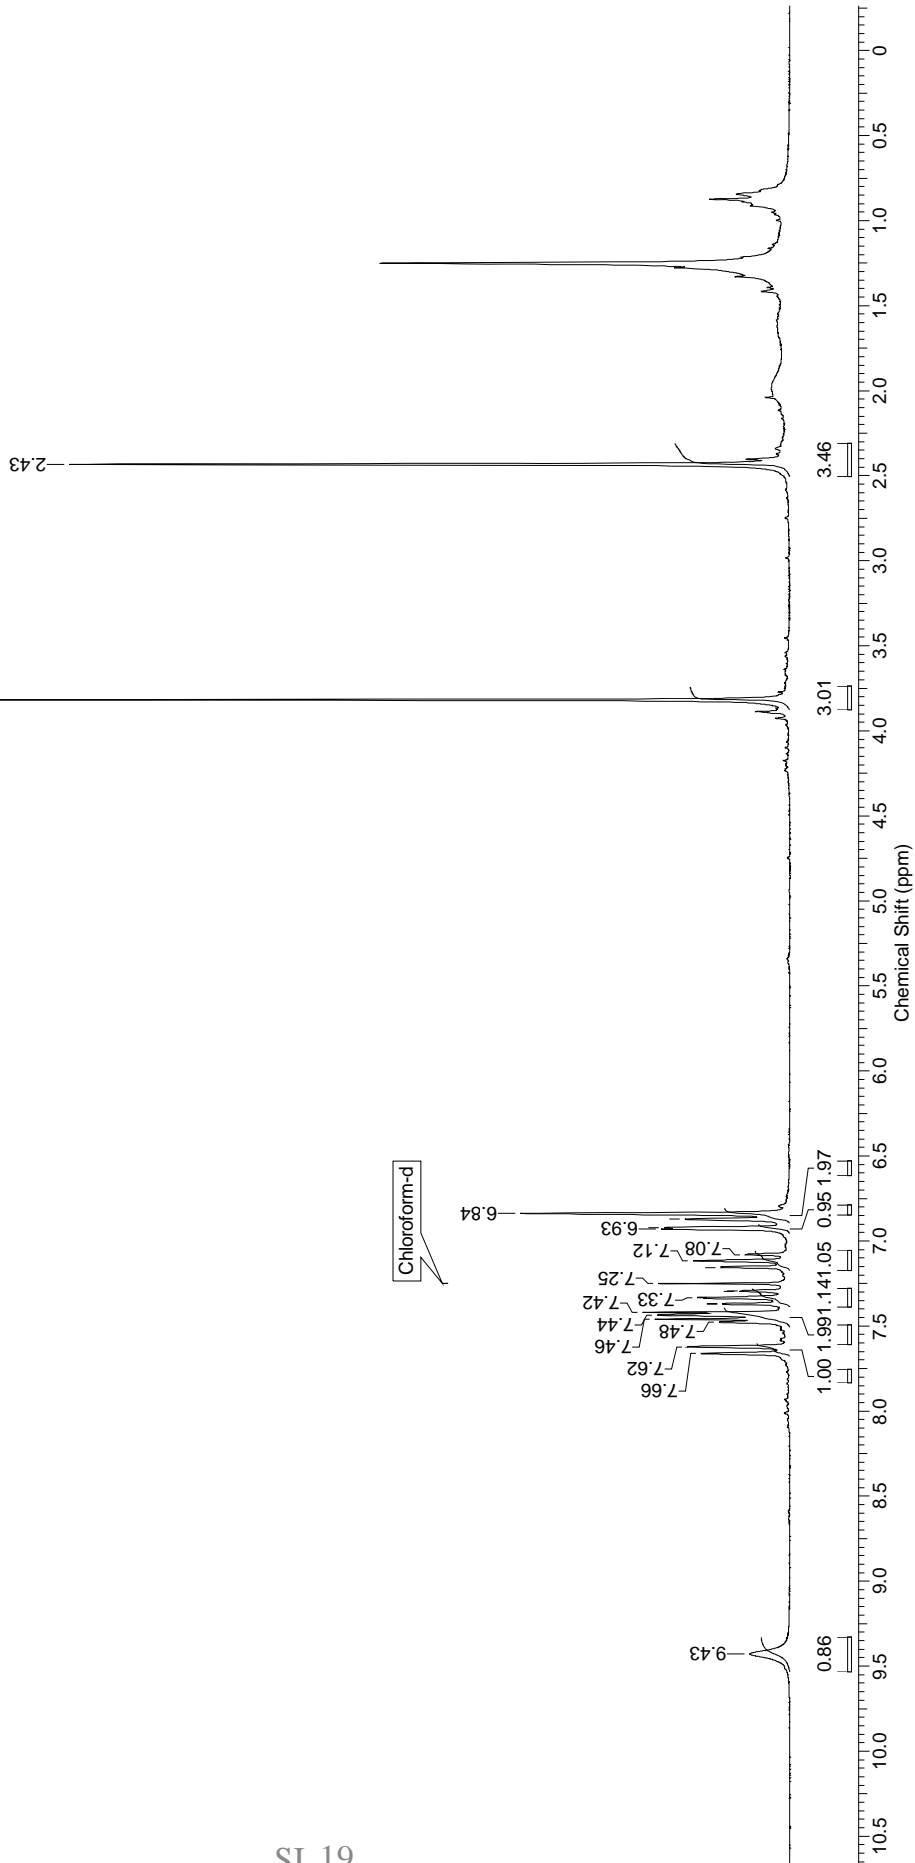

|                        |                                            |                      |           |                  |                     |                        |                 |
|------------------------|--------------------------------------------|----------------------|-----------|------------------|---------------------|------------------------|-----------------|
| Acquisition Time (sec) | 2.7329                                     | Comment              | yogesh    | Date             | 25/07/2013 07:52:42 | Original Points Count  | 32768           |
| File Name              | F:\yogesh\Indole metho\NMR\ym-953\CNMR.ESP |                      |           | Frequency (MHz)  | 50.32               | Nucleus                | <sup>13</sup> C |
| Points Count           | 32768                                      | Spectrum Offset (Hz) | 5028.8081 | Sweep Width (Hz) | 11990.41            | Temperature (degree C) | 0.000           |

CNMR.ESP

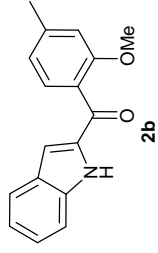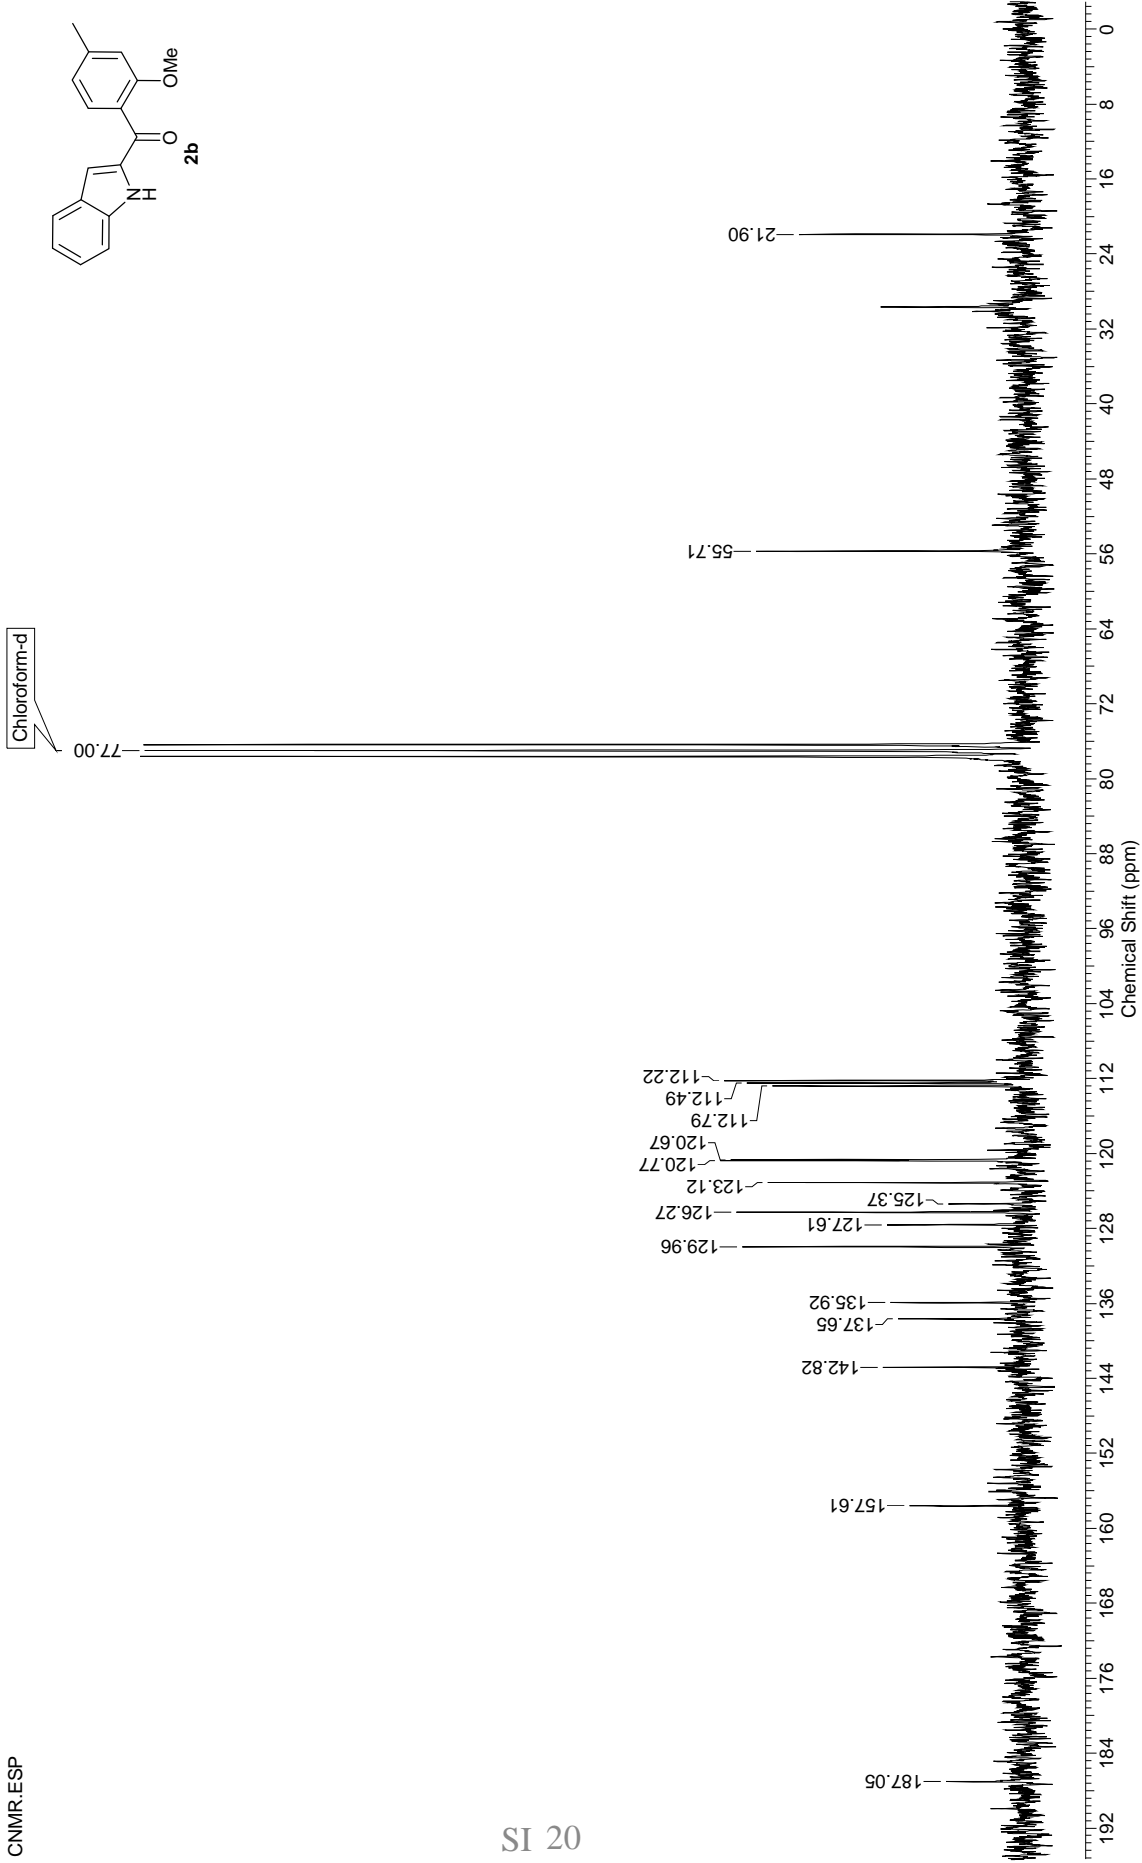

|                               |                                            |                             |           |                         |                     |                               |                 |
|-------------------------------|--------------------------------------------|-----------------------------|-----------|-------------------------|---------------------|-------------------------------|-----------------|
| <b>Acquisition Time (sec)</b> | 2.7329                                     | <b>Comment</b>              | yogesh    | <b>Date</b>             | 25/07/2013 07:14:56 | <b>Original Points Count</b>  | 32768           |
| <b>File Name</b>              | F:\yogesh\Indole metho\NMR\vm-953\DEPT.ESP |                             |           | <b>Frequency (MHz)</b>  | 50.32               | <b>Nucleus</b>                | <sup>13</sup> C |
| <b>Points Count</b>           | 32768                                      | <b>Spectrum Offset (Hz)</b> | 5027.2090 | <b>Sweep Width (Hz)</b> | 11990.41            | <b>Temperature (degree C)</b> | 0.000           |

DEPT.ESP

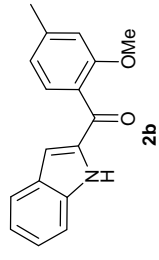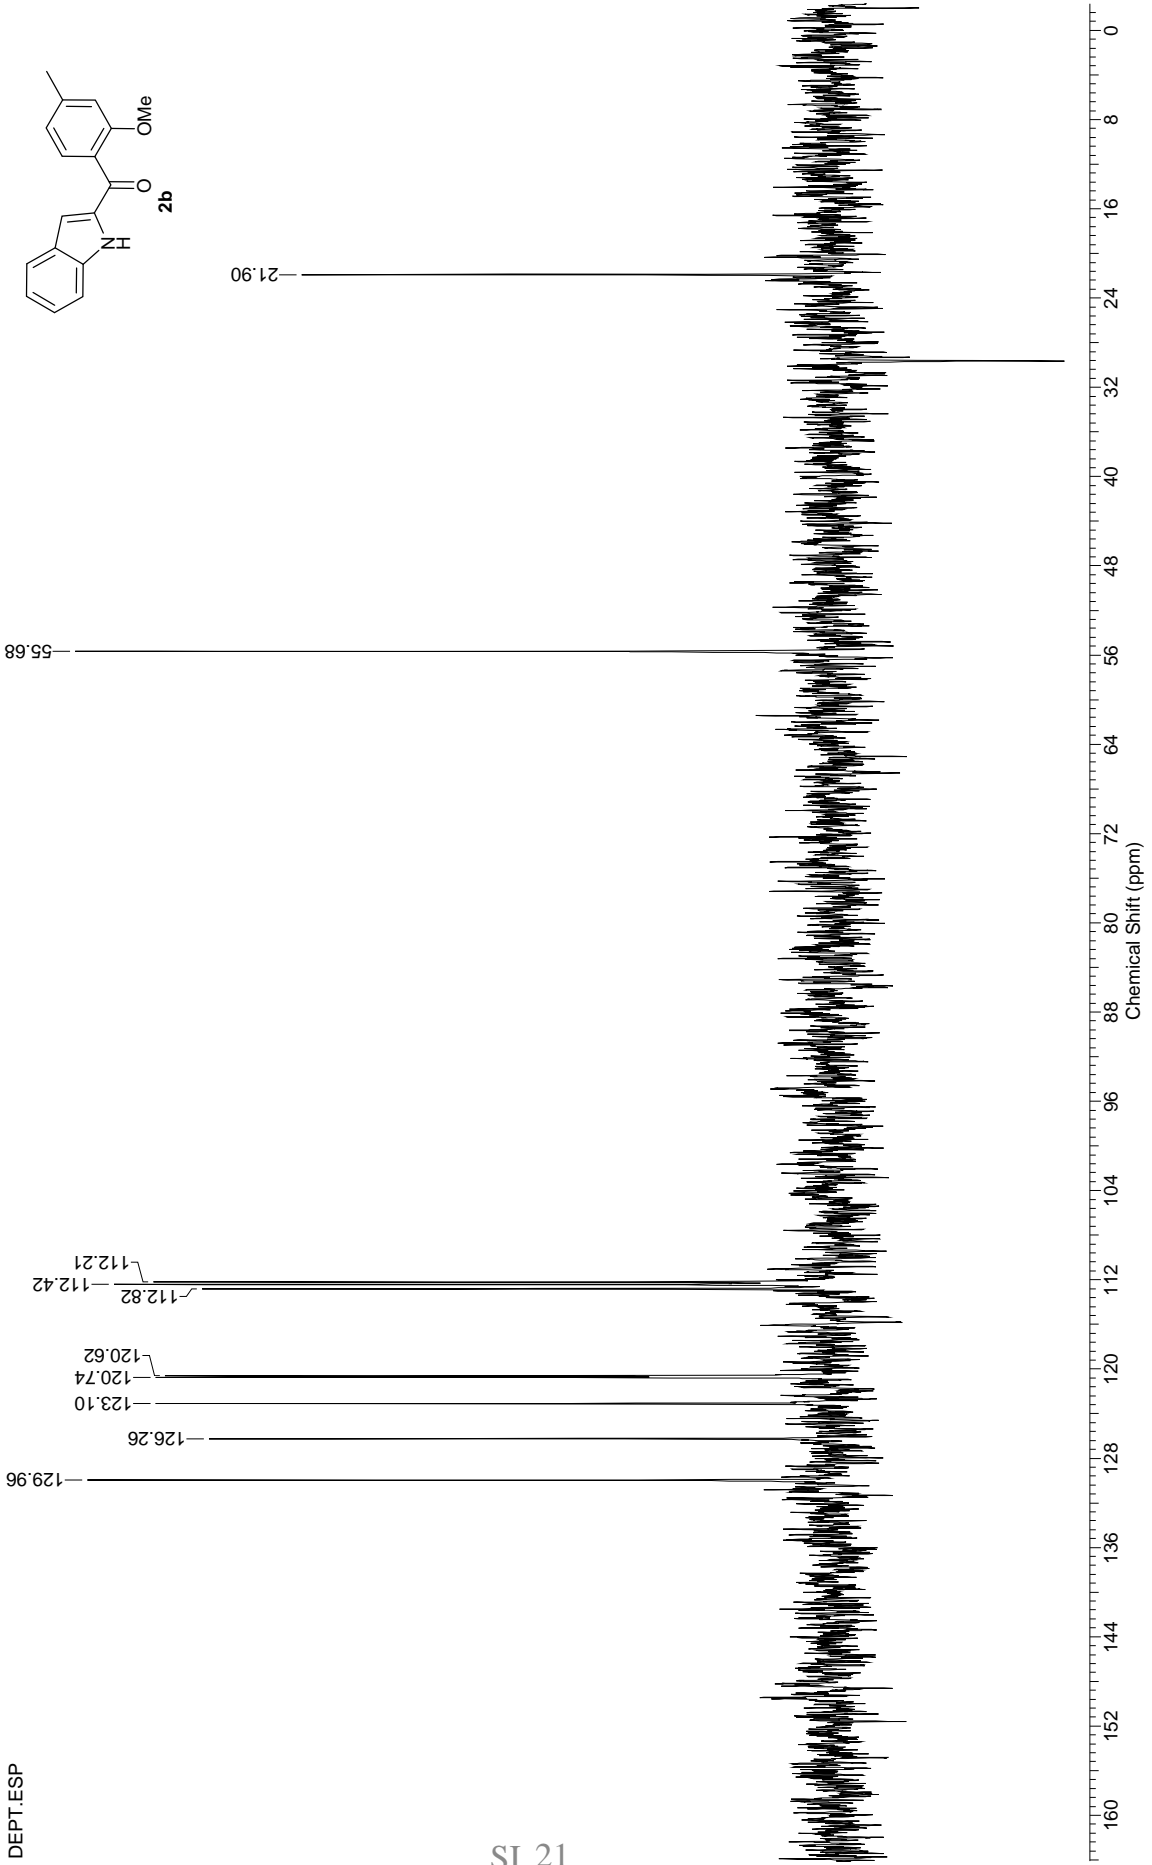



|                        |                      |                   |                                                                                          |                        |                      |
|------------------------|----------------------|-------------------|------------------------------------------------------------------------------------------|------------------------|----------------------|
| Acquisition Time (sec) | 3.9584               | Comment           | yogesh                                                                                   | Date                   | 07 Aug 2013 15:26:00 |
| Date Stamp             | 07 Aug 2013 15:26:00 | File Name         | \\lagn\nmr_data\AV200\AUG_13\AV200\data\AV200\Administrator\hnmr\Wed2av2#032\1\PDATA111r |                        |                      |
| Frequency (MHz)        | 200.13               | Nucleus           | 1H                                                                                       | Number of Transients   | 8                    |
| Original Points Count  | 16384                | Owner             | Administrator                                                                            | Points Count           | 32768                |
| Receiver Gain          | 1149.40              | SW(cyclical) (Hz) | 4139.07                                                                                  | Pulse Sequence         | zg30                 |
| Spectrum Offset (Hz)   | 1225.6606            | Spectrum Type     | STANDARD                                                                                 | Solvent                | CHLOROFORM-d         |
|                        |                      | Sweep Width (Hz)  | 4138.95                                                                                  | Temperature (degree C) | 27.000               |

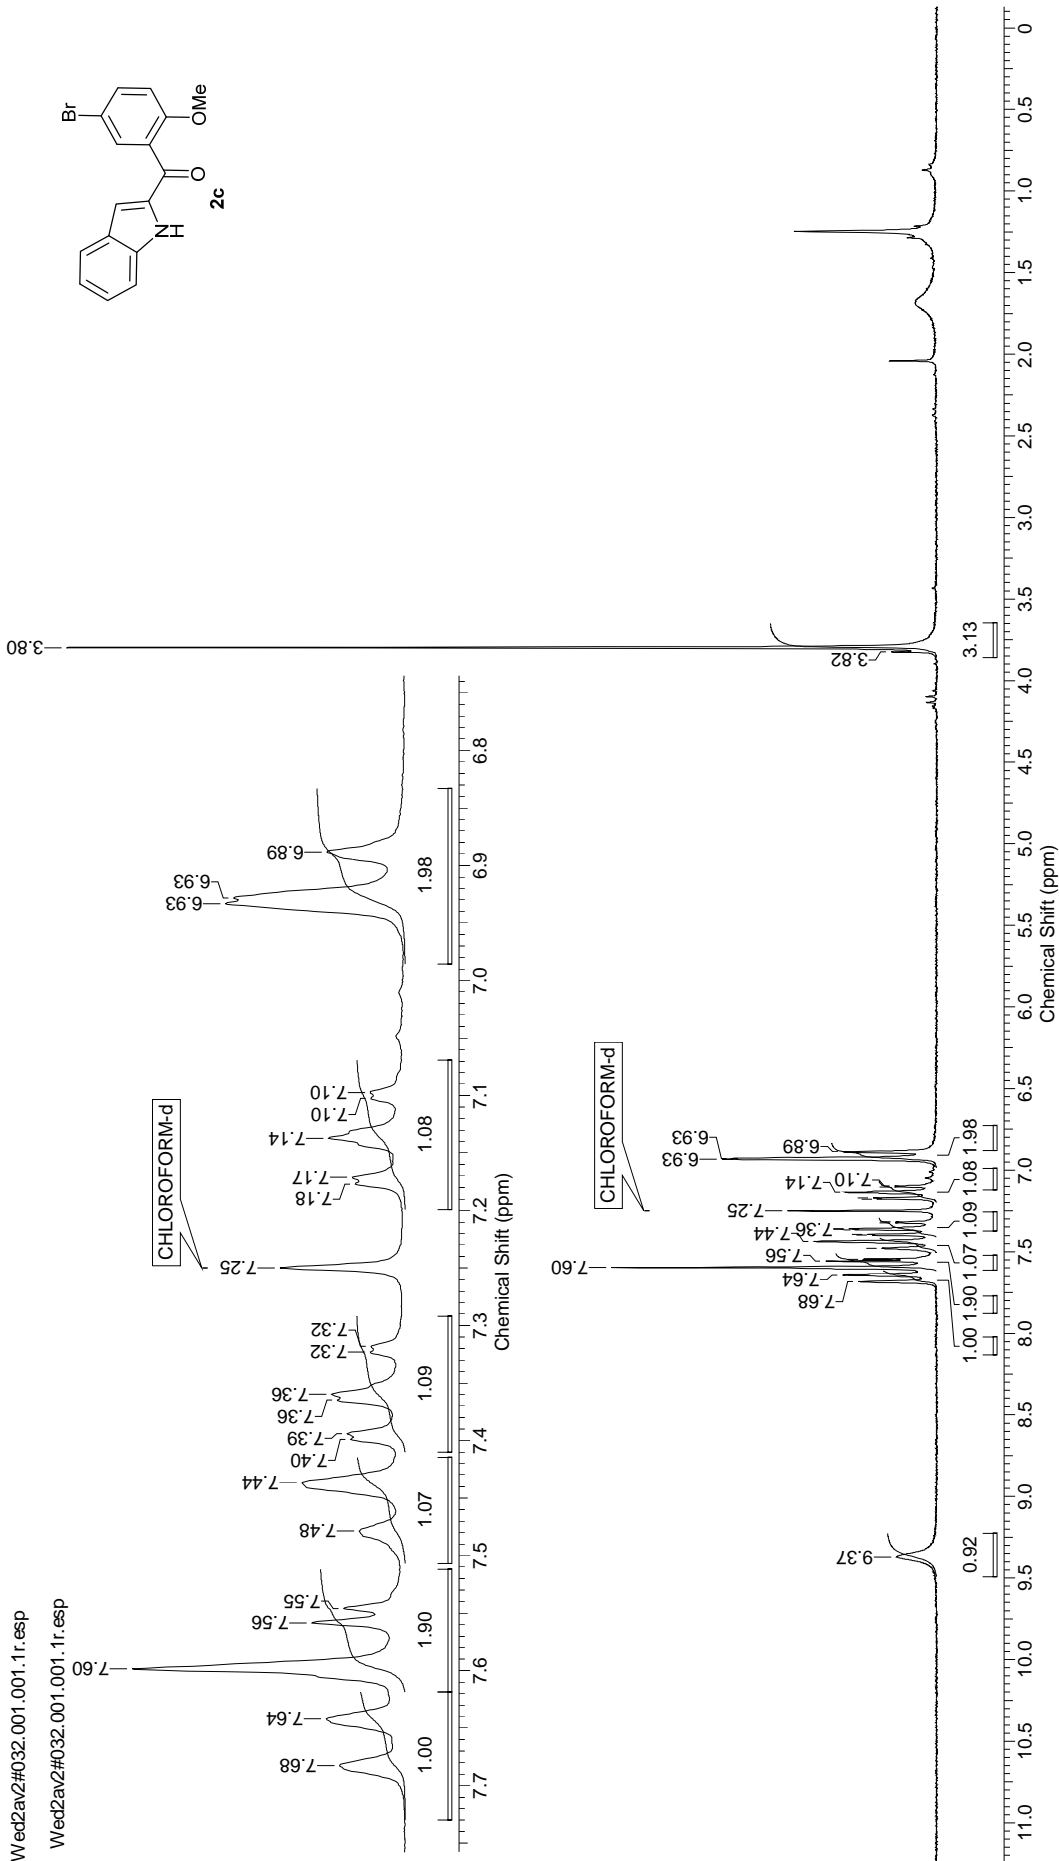

|                               |                                                 |                          |              |                               |                      |                             |                      |
|-------------------------------|-------------------------------------------------|--------------------------|--------------|-------------------------------|----------------------|-----------------------------|----------------------|
| <b>Acquisition Time (sec)</b> | 1.0486                                          | <b>Comment</b>           | 13C          | <b>Date</b>                   | 14 Aug 2013 10:49:04 | <b>Date Stamp</b>           | 14 Aug 2013 10:49:04 |
| <b>File Name</b>              | H:\New folder\Wed3av500#001_ym-967\3\PDATA\1\1r | <b>Frequency (MHz)</b>   | 125.76       | <b>Nucleus</b>                | 13C                  | <b>Number of Transients</b> | 635                  |
| <b>Origin</b>                 | spect                                           | <b>Owner</b>             | nmr          | <b>Points Count</b>           | 32768                | <b>Pulse Sequence</b>       | zgpg30               |
| <b>Receiver Gain</b>          | 575.00                                          | <b>Solvent</b>           | CHLOROFORM-d | <b>Solvent</b>                | CHLOROFORM-d         | <b>Spectrum Offset (Hz)</b> | 11979.3203           |
| <b>Standard Type</b>          | STANDARD                                        | <b>SW(cyclical) (Hz)</b> | 31250.00     | <b>Temperature (degree C)</b> | 22.500               |                             |                      |
|                               |                                                 | <b>Sweep Width (Hz)</b>  | 31249.05     |                               |                      |                             |                      |

Wed3av500#001.003.001.1r.esp

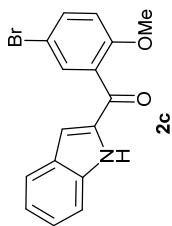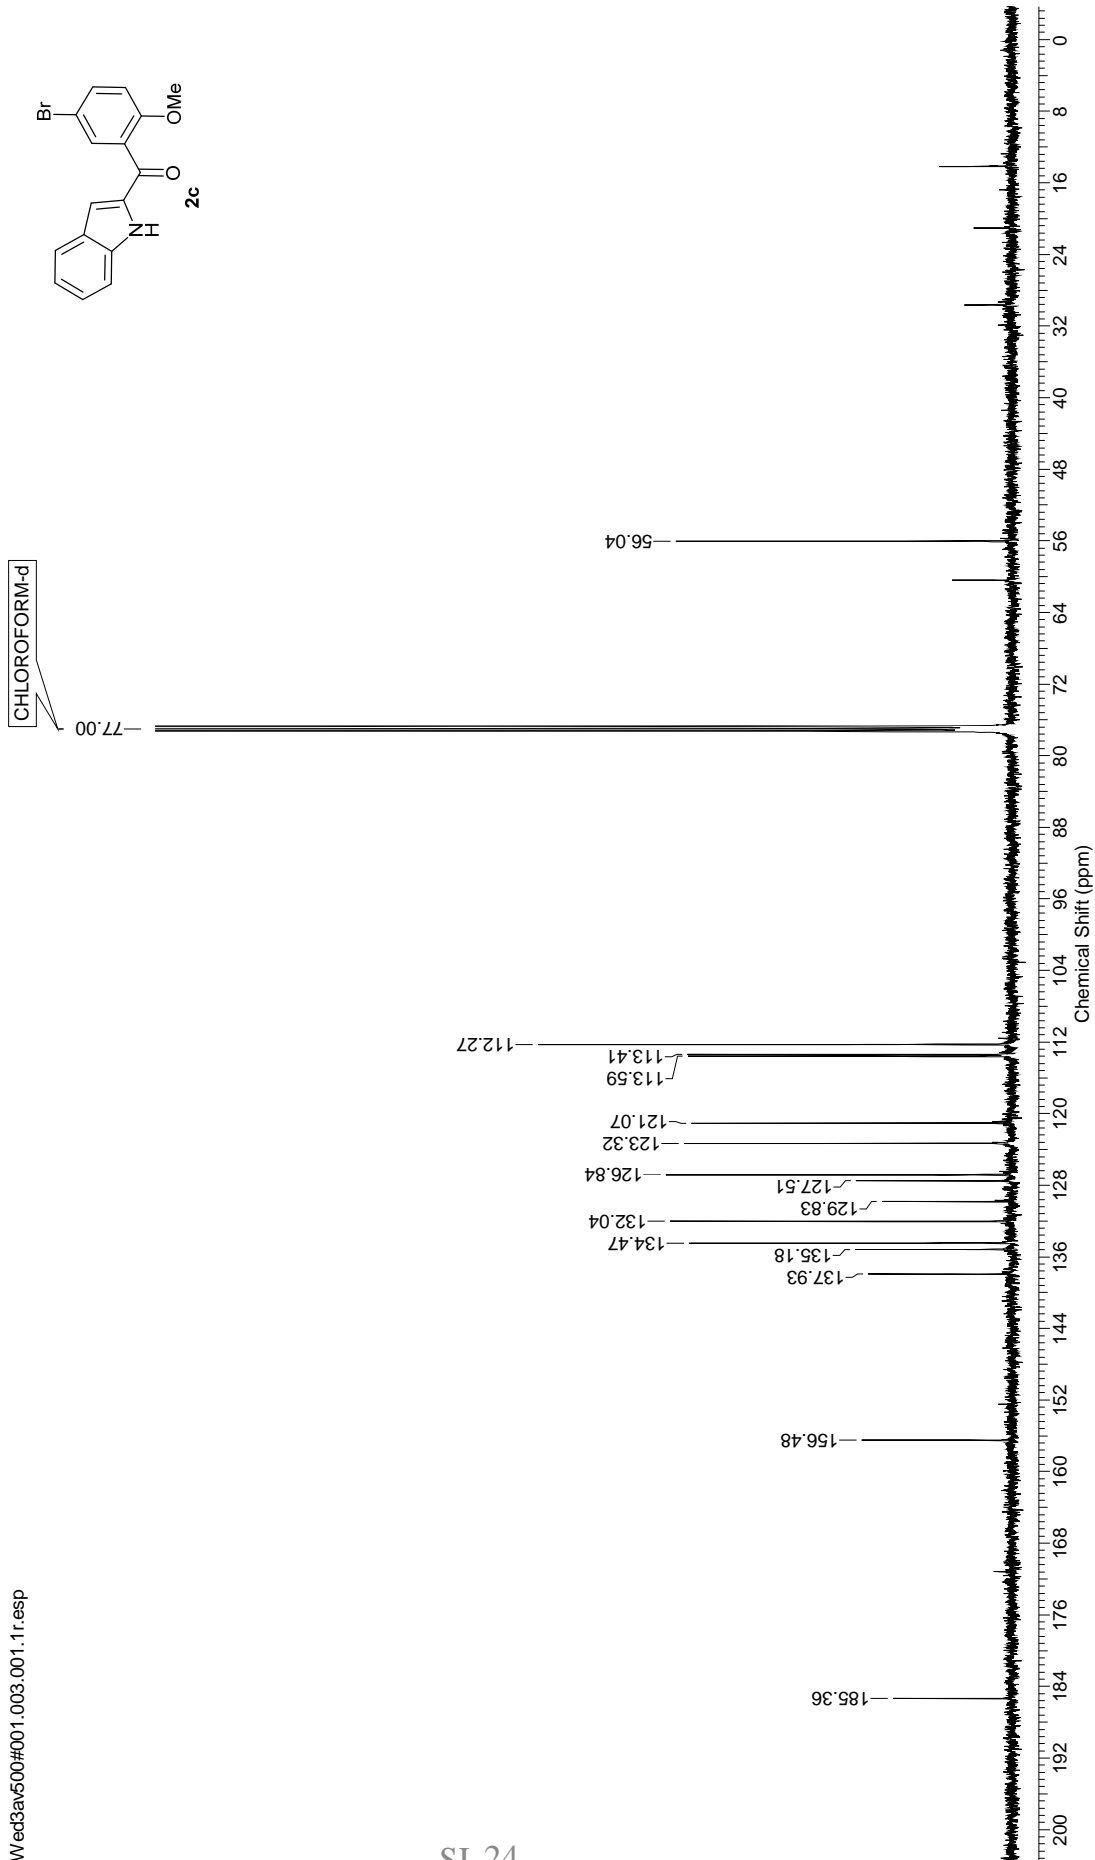



|                               |                                                |                          |             |                               |                      |                             |                      |
|-------------------------------|------------------------------------------------|--------------------------|-------------|-------------------------------|----------------------|-----------------------------|----------------------|
| <b>Acquisition Time (sec)</b> | 1.1010                                         | <b>Comment</b>           | DEPT; DEPT; | <b>Date</b>                   | 14 Aug 2013 10:27:44 | <b>Date Stamp</b>           | 14 Aug 2013 10:27:44 |
| <b>File Name</b>              | H:\New folder\Wed3av500#001_ym-9672\PDATA\1\1r | <b>Frequency (MHz)</b>   | 125.76      | <b>Nucleus</b>                | 13C                  | <b>Number of Transients</b> | 1000                 |
| <b>Origin</b>                 | spect                                          | <b>Owner</b>             | nmr         | <b>Points Count</b>           | 32768                | <b>Pulse Sequence</b>       | dept135              |
| <b>Receiver Gain</b>          | 2050.00                                        | <b>SW(cyclical) (Hz)</b> | 29761.90    | <b>Solvent</b>                | CHLOROFORM-d         | <b>Spectrum Offset (Hz)</b> | 12568.3320           |
| <b>Spectrum Type</b>          | DEPT135                                        | <b>Sweep Width (Hz)</b>  | 29761.00    | <b>Temperature (degree C)</b> | 22.000               |                             |                      |

Wed3av500#001.002.001.1r.esp

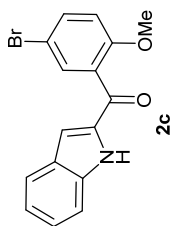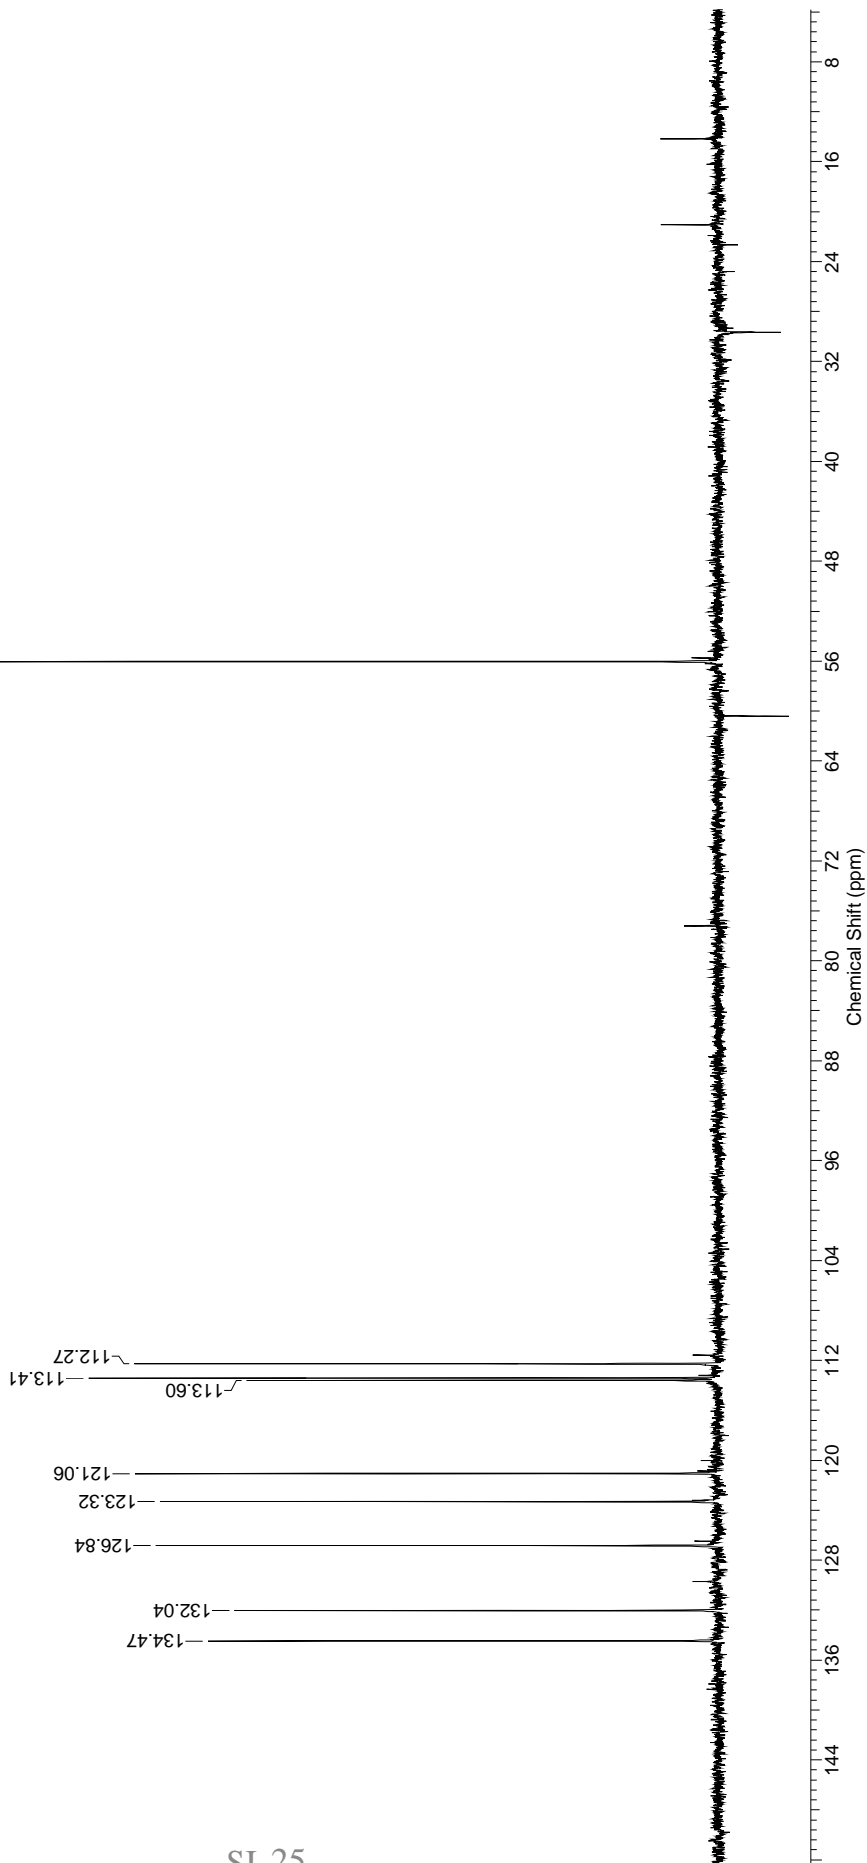

|                               |                      |                              |                                                            |                             |                      |
|-------------------------------|----------------------|------------------------------|------------------------------------------------------------|-----------------------------|----------------------|
| <b>Acquisition Time (sec)</b> | 1.9923               | <b>Comment</b>               | Yogesh 1H                                                  | <b>Date</b>                 | 31 Jul 2013 21:45:44 |
| <b>Date Stamp</b>             | 31 Jul 2013 21:45:44 | <b>File Name</b>             | \agn\nmr_data\AV400\July_13_400\Wed5av400#019\1\PDATA\111r |                             |                      |
| <b>Frequency (MHz)</b>        | 400.13               | <b>Nucleus</b>               | 1H                                                         | <b>Number of Transients</b> | 64                   |
| <b>Owner</b>                  | Administrator        | <b>Points Count</b>          | 32768                                                      | <b>Origin</b>               | spect                |
| <b>Solvent</b>                | CHLOROFORM-d         | <b>Original Points Count</b> | 16384                                                      | <b>Receiver Gain</b>        | 456.00               |
| <b>Temperature (degree C)</b> | 23.100               | <b>SW(cyclical) (Hz)</b>     | 8223.68                                                    | <b>Spectrum Type</b>        | STANDARD             |
|                               |                      | <b>Sweep Width (Hz)</b>      | 8223.43                                                    |                             |                      |

Wed5av400#019.001.H1NMR.1r.esp

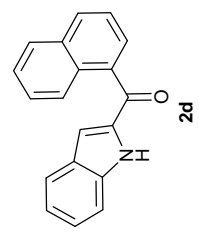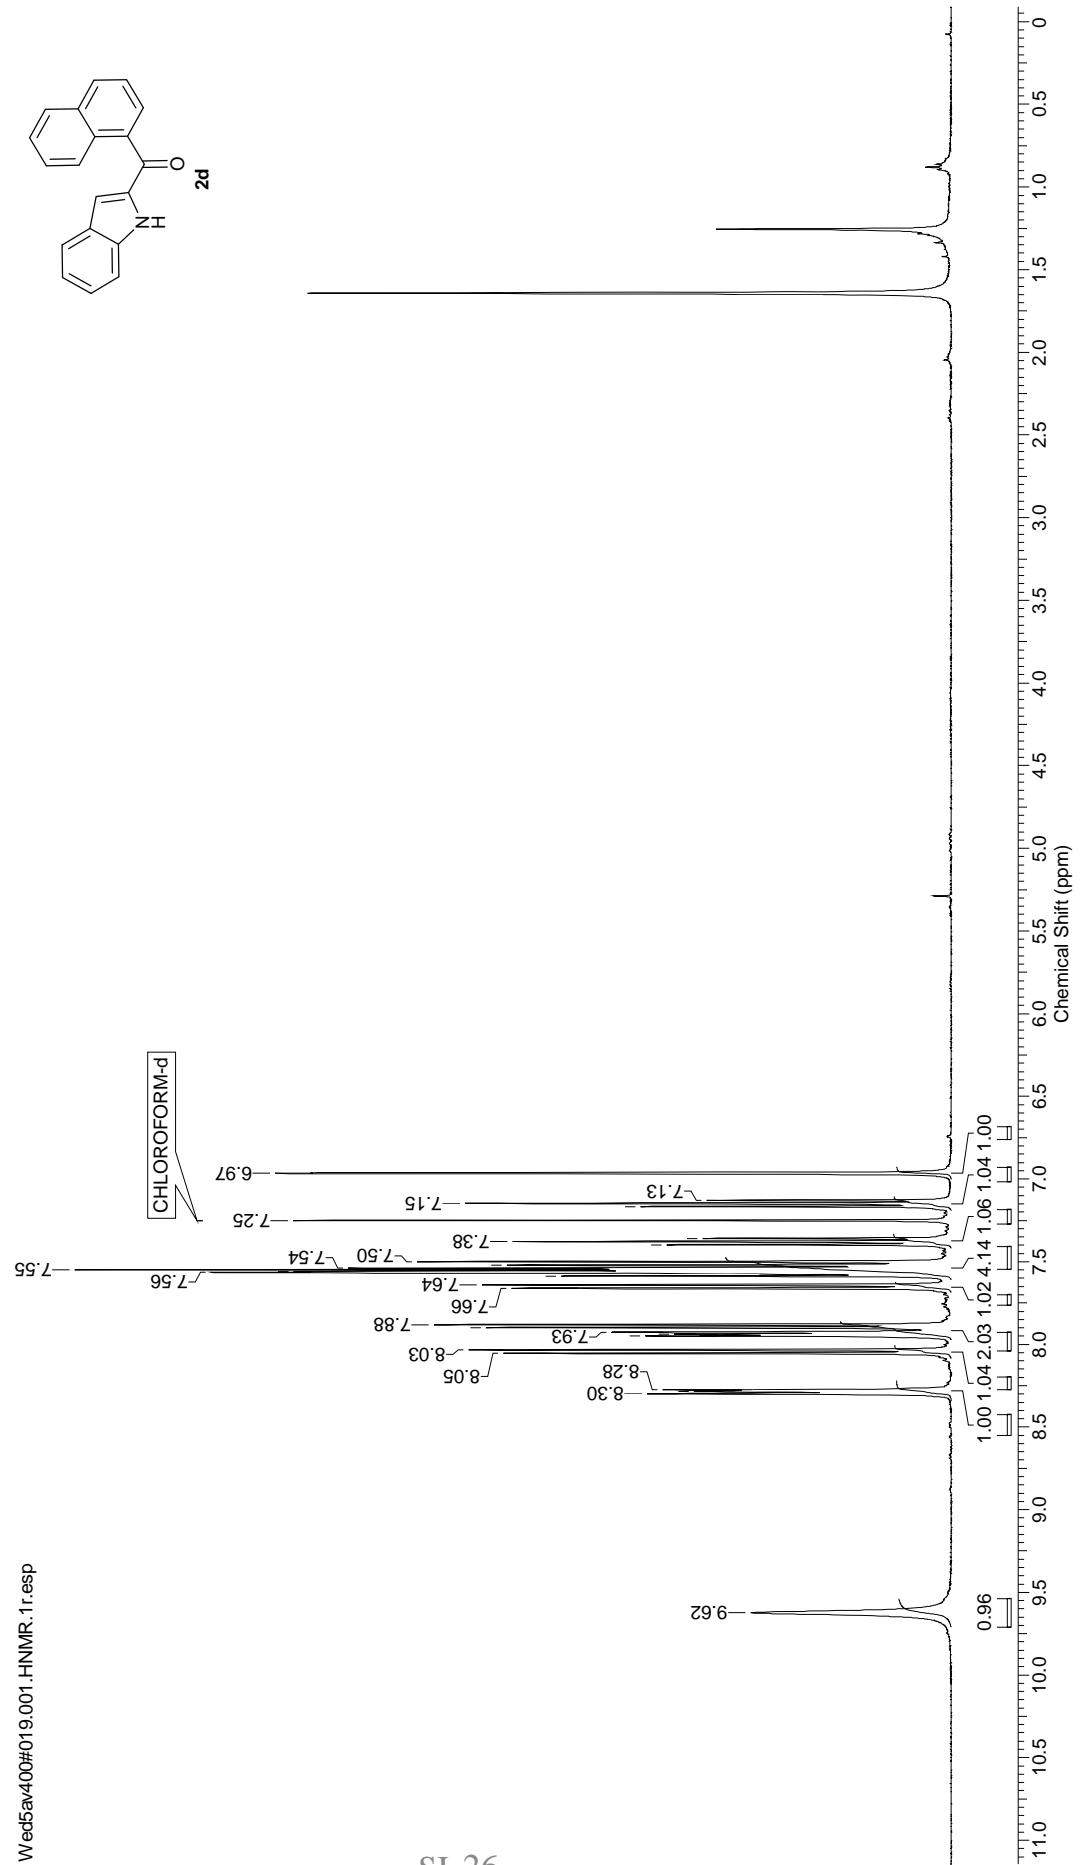



|                               |                      |                     |              |                              |                                                              |
|-------------------------------|----------------------|---------------------|--------------|------------------------------|--------------------------------------------------------------|
| <b>Acquisition Time (sec)</b> | 0.6488               | <b>Comment</b>      | DEPT         | <b>Date</b>                  | 01 Aug 2013 00:44:56                                         |
| <b>Date Stamp</b>             | 01 Aug 2013 00:44:56 | <b>Nucleus</b>      | 13C          | <b>File Name</b>             | \agn\hmr_data\AV400\July_13_400\Wed5av400#019\2\PD\DATA\1\1r |
| <b>Frequency (MHz)</b>        | 100.61               | <b>Points Count</b> | 32768        | <b>Number of Transients</b>  | 4000                                                         |
| <b>Owner</b>                  | root                 | <b>Solvent</b>      | CHLOROFORM-d | <b>Pulse Sequence</b>        | dept135                                                      |
| <b>Temperature (degree C)</b> | 23.200               |                     |              | <b>Receiver Gain</b>         | 16384.00                                                     |
|                               |                      |                     |              | <b>Spectrum Type</b>         | DEPT135                                                      |
|                               |                      |                     |              | <b>Spectrum Offset (Hz)</b>  | 10056.6826                                                   |
|                               |                      |                     |              | <b>Original Points Count</b> | 16384                                                        |
|                               |                      |                     |              | <b>SW(cyclical) (Hz)</b>     | 25252.53                                                     |
|                               |                      |                     |              | <b>Sweep Width (Hz)</b>      | 25251.75                                                     |

Wed5av400#019.002.DEPT.1r.esp

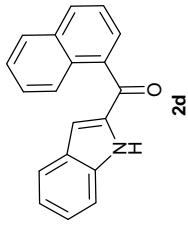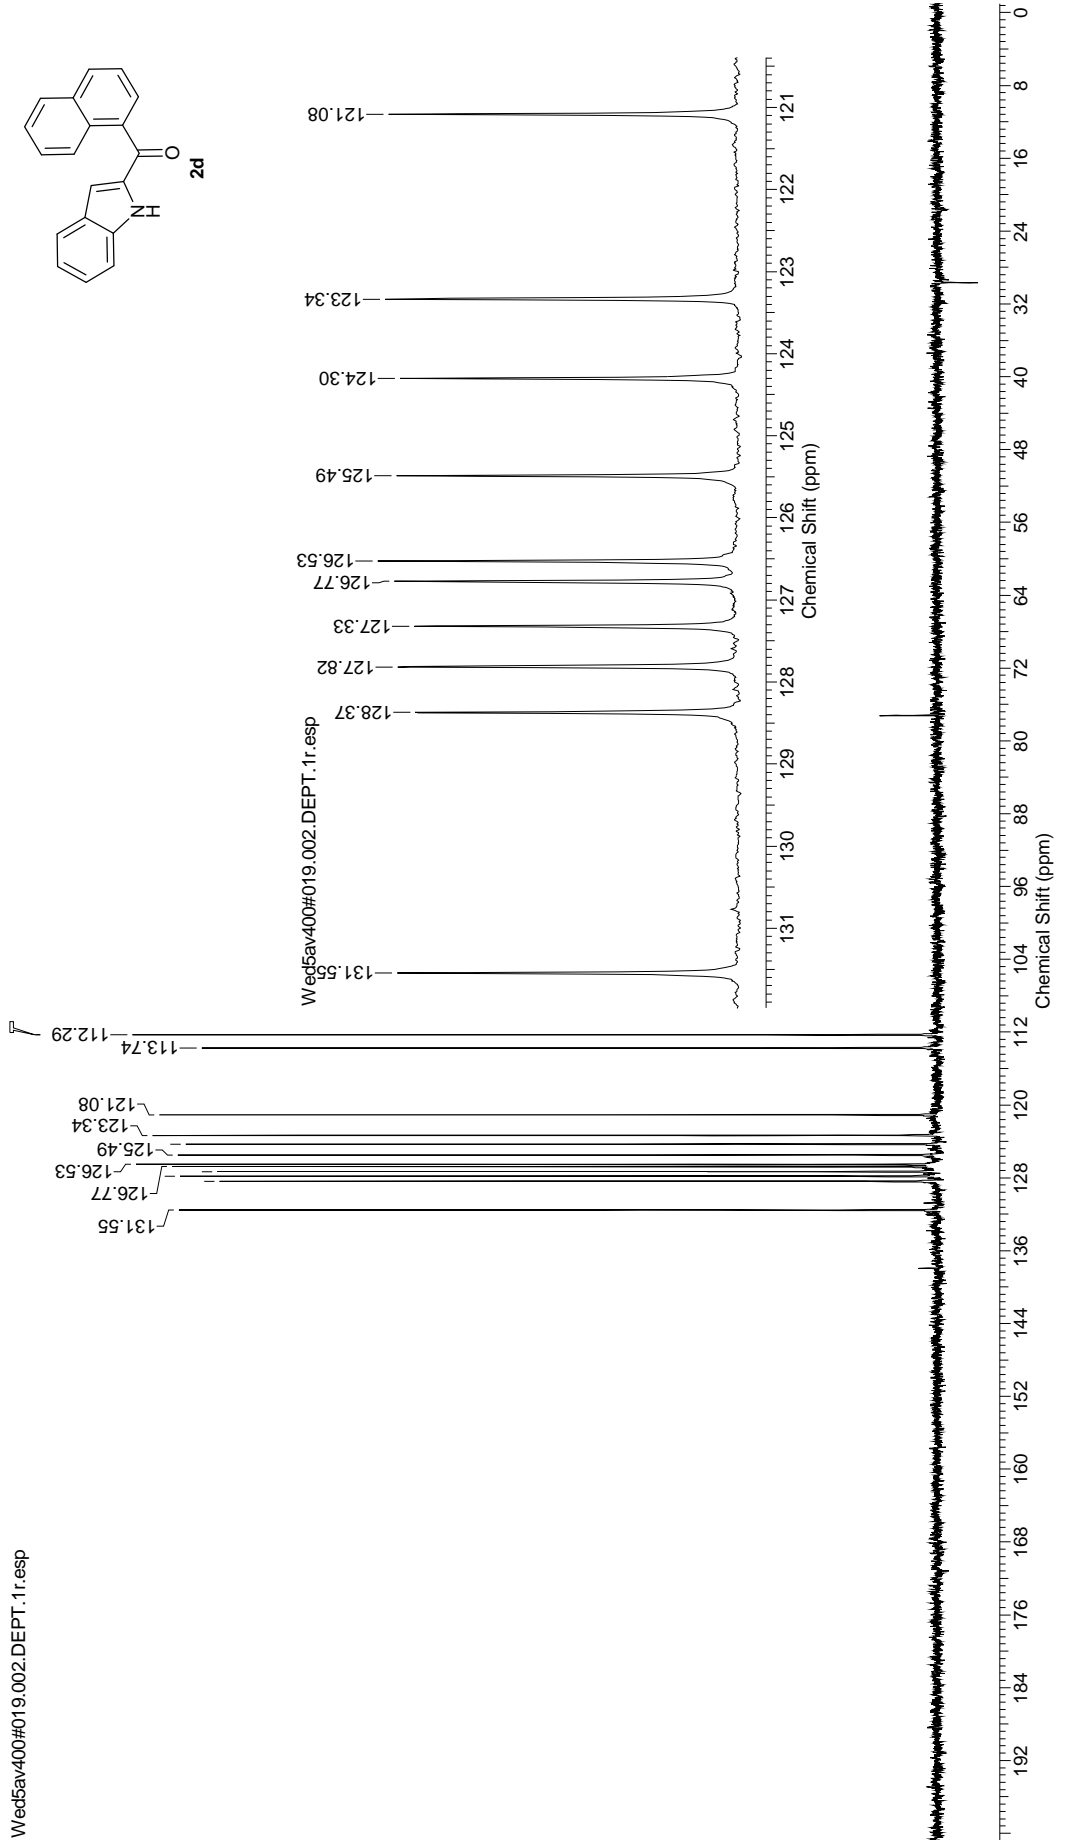

D:\Data\YM-957

9/13/2013 11:30:07 AM

YM-957 #1150 RT: 5.12 AV: 1 NL: 1.15E9  
T: FTMS + p ESI Full ms [100.00-700.00]

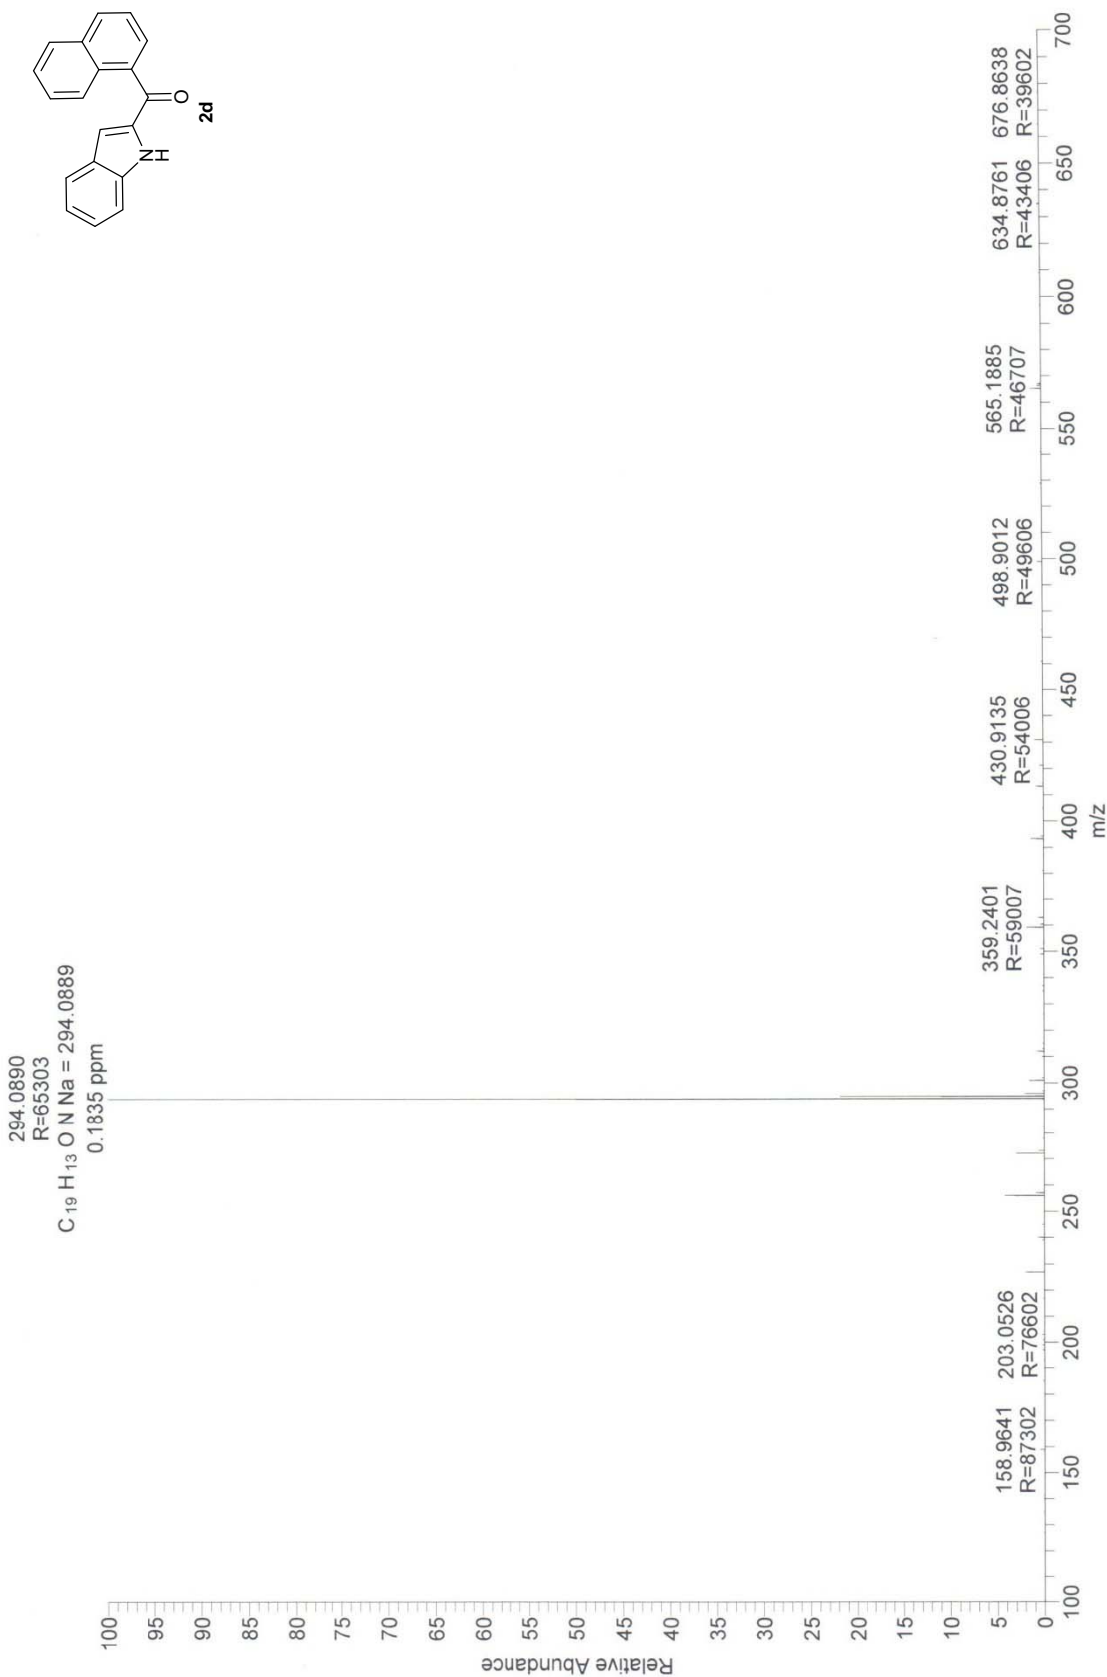

|                               |                                         |                              |           |                               |                      |                             |                      |
|-------------------------------|-----------------------------------------|------------------------------|-----------|-------------------------------|----------------------|-----------------------------|----------------------|
| <b>Acquisition Time (sec)</b> | 2.0031                                  | <b>Comment</b>               | Yogesh 1H | <b>Date</b>                   | 08 Aug 2013 23:09:20 | <b>Date Stamp</b>           | 08 Aug 2013 23:09:20 |
| <b>File Name</b>              | H:\New folder\Thu2av500#026\1\PDATA\11r | <b>Frequency (MHz)</b>       | 500.13    | <b>Nucleus</b>                | 1H                   | <b>Number of Transients</b> | 64                   |
| <b>Origin</b>                 | spect                                   | <b>Original Points Count</b> | 20031     | <b>Owner</b>                  | 32768                | <b>Pulse Sequence</b>       | zg30                 |
| <b>Receiver Gain</b>          | 256.00                                  | <b>SW(cyclical) (Hz)</b>     | 10000.00  | <b>Solvent</b>                | CHLOROFORM-d         | <b>Spectrum Offset (Hz)</b> | 2219.7769            |
| <b>Spectrum Type</b>          | STANDARD                                | <b>Sweep Width (Hz)</b>      | 9999.70   | <b>Temperature (degree C)</b> | 21.900               |                             |                      |

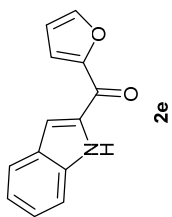

Thu2av500#026.001.001.1r.esp

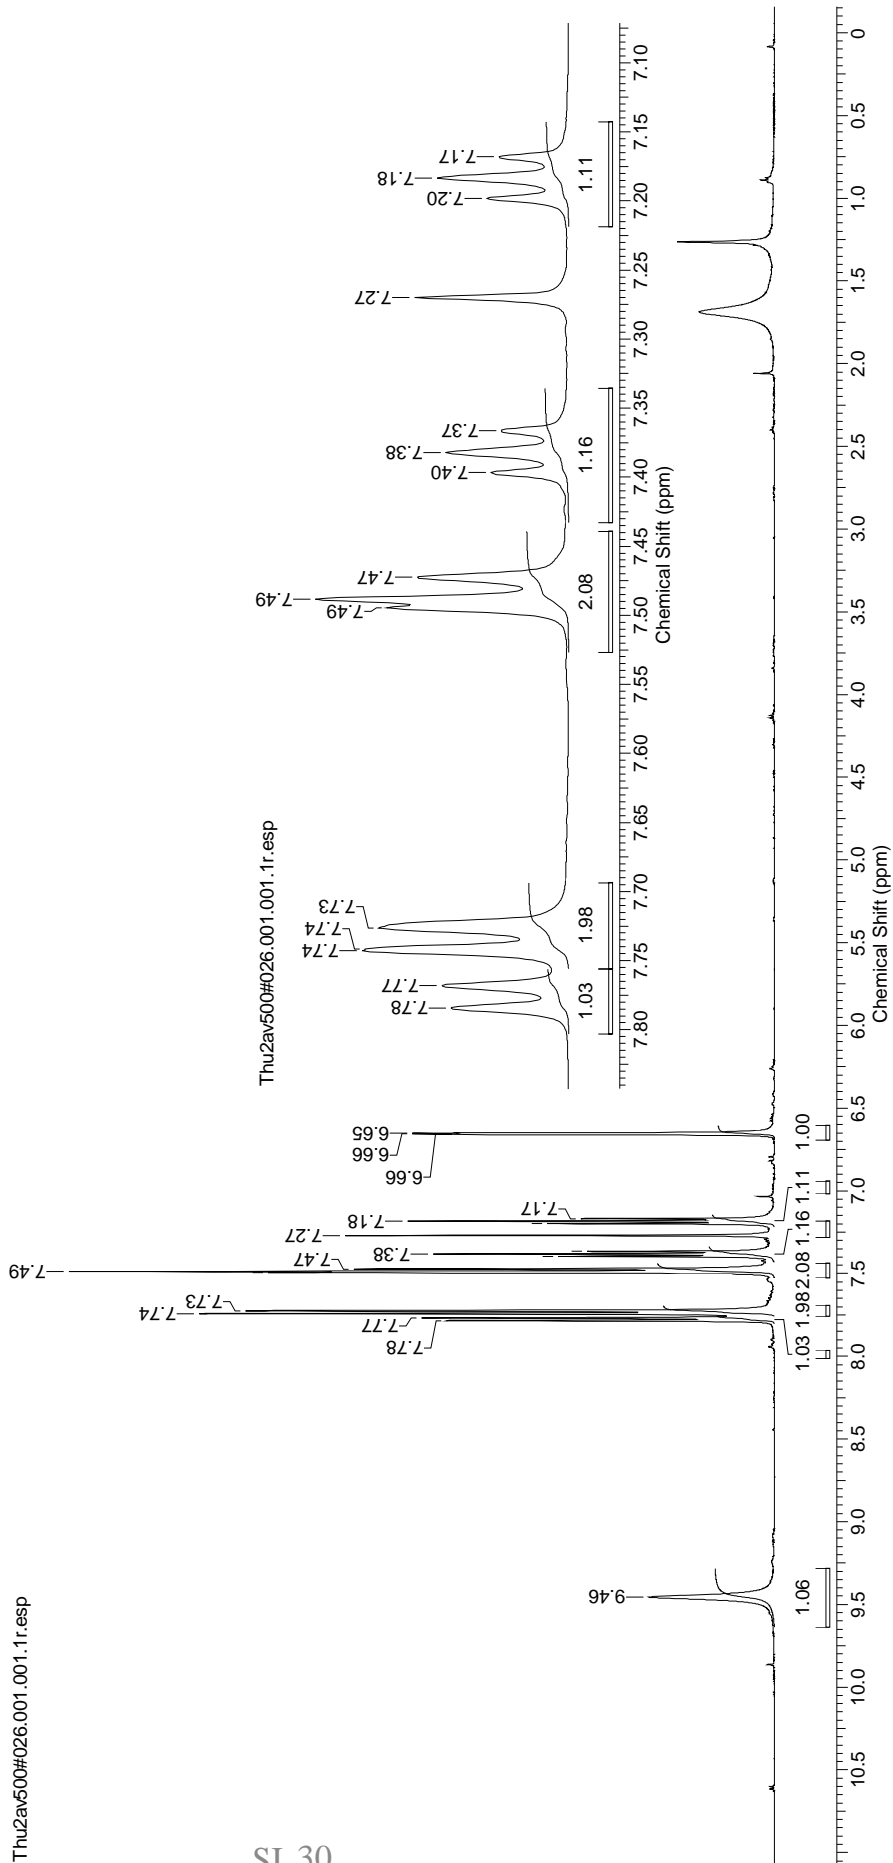

|                        |                                          |                       |          |                        |                      |                      |                      |
|------------------------|------------------------------------------|-----------------------|----------|------------------------|----------------------|----------------------|----------------------|
| Acquisition Time (sec) | 1.0486                                   | Comment               | 13C      | Date                   | 09 Aug 2013 09:40:48 | Date Stamp           | 09 Aug 2013 09:40:48 |
| File Name              | H:\New folder\Thu2av500#026\3\PDATA\1\1r | Original Points Count | 32768    | Frequency (MHz)        | 125.76               | Nucleus              | 13C                  |
| Origin                 | spect                                    | SW(cyclical) (Hz)     | 31250.00 | Owner                  | nmr                  | Points Count         | 32768                |
| Receiver Gain          | 575.00                                   | Sweep Width (Hz)      | 31249.05 | Solvent                | CHLOROFORM-d         | Pulse Sequence       | zgpg30               |
| Spectrum Type          | STANDARD                                 |                       |          | Temperature (degree C) | 22.400               | Spectrum Offset (Hz) | 11981.2275           |

Thu2av500#026.003.001.1r.esp

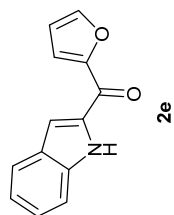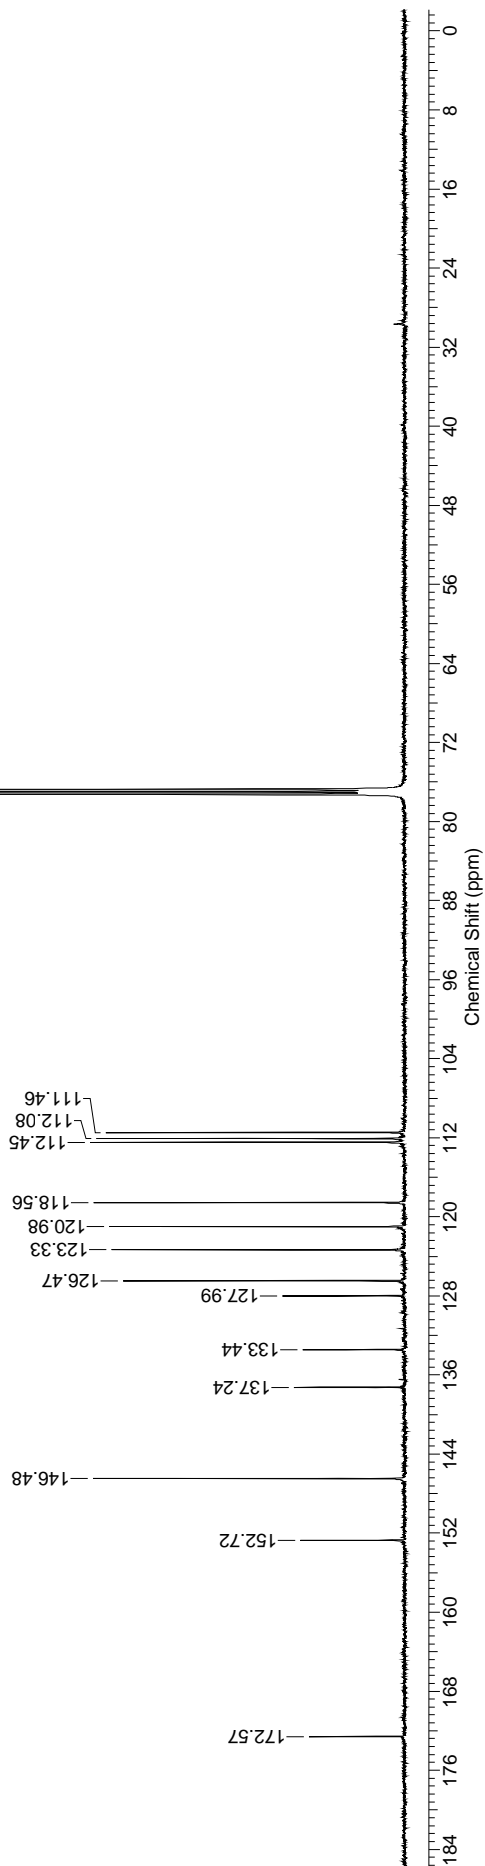

|                               |                                          |                              |          |                               |                      |                             |                      |
|-------------------------------|------------------------------------------|------------------------------|----------|-------------------------------|----------------------|-----------------------------|----------------------|
| <b>Acquisition Time (sec)</b> | 1.1010                                   | <b>Comment</b>               | DEPT;    | <b>Date</b>                   | 09 Aug 2013 01:30:08 | <b>Date Stamp</b>           | 09 Aug 2013 01:30:08 |
| <b>File Name</b>              | H:\New folder\Thu2av500#026\2\IPDATA\11r | <b>Original Points Count</b> | 32768    | <b>Frequency (MHz)</b>        | 125.76               | <b>Number of Transients</b> | 3200                 |
| <b>Origin</b>                 | spect                                    | <b>SW(cyclical) (Hz)</b>     | 29761.90 | <b>Owner</b>                  | nmr                  | <b>Pulse Sequence</b>       | dept135              |
| <b>Receiver Gain</b>          | 2050.00                                  | <b>Sweep Width (Hz)</b>      | 29761.00 | <b>Solvent</b>                | CHLOROFORM-d         | <b>Spectrum Offset (Hz)</b> | 12570.5576           |
| <b>Spectrum Type</b>          | DEPT135                                  | <b>Sweep Width (Hz)</b>      | 29761.00 | <b>Temperature (degree C)</b> | 22.100               |                             |                      |

Thu2av500#026.002.001.1r.esp

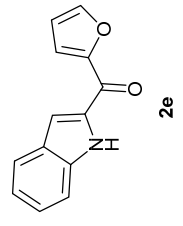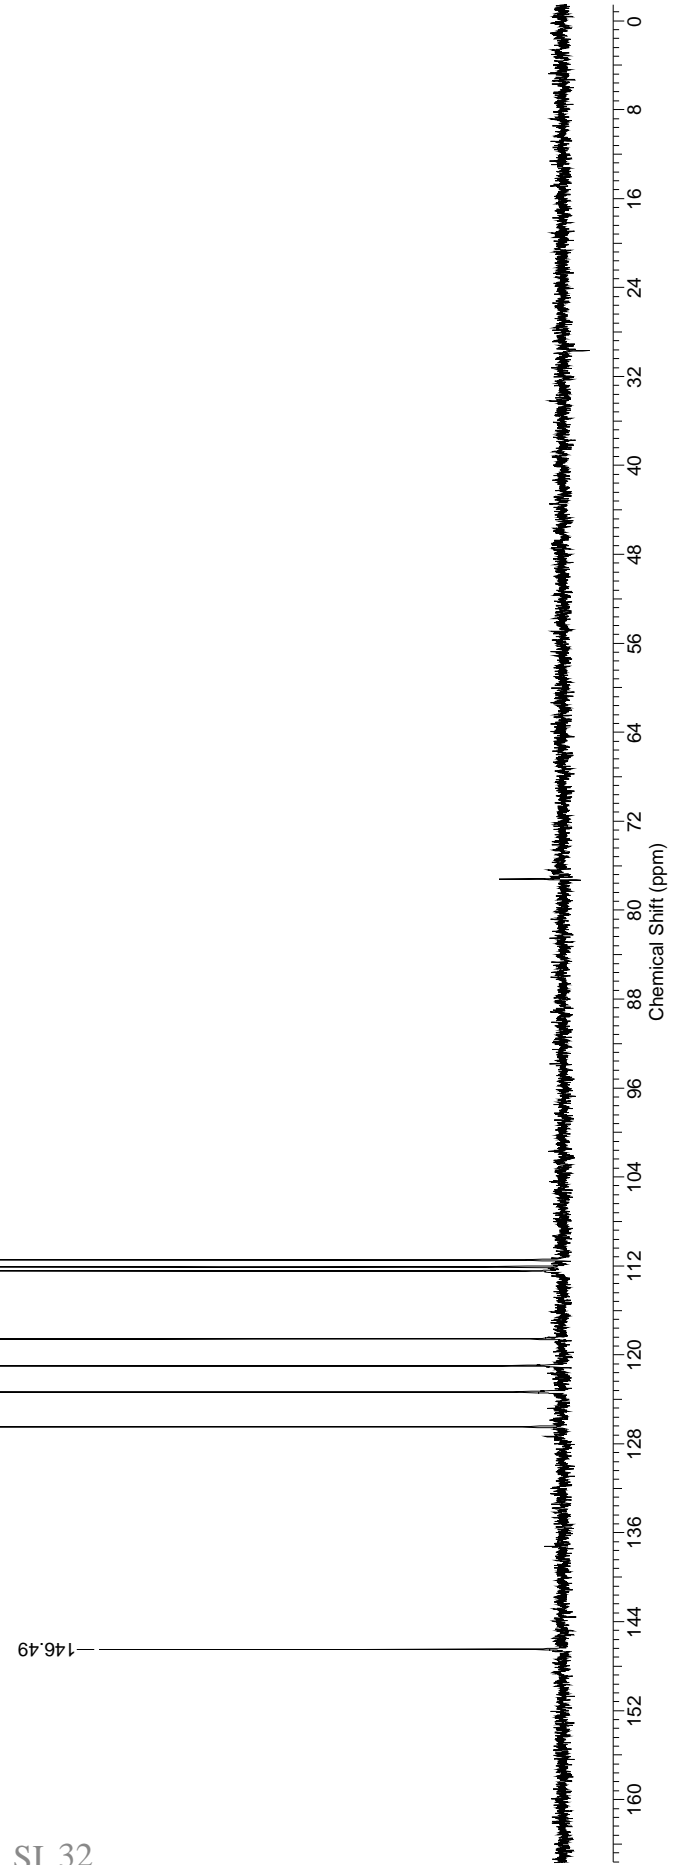



|                               |                      |                              |                                                 |                          |                      |
|-------------------------------|----------------------|------------------------------|-------------------------------------------------|--------------------------|----------------------|
| <b>Acquisition Time (sec)</b> | 2.0031               | <b>Comment</b>               | yogesh 1H                                       | <b>Date</b>              | 19 Sep 2013 12:44:16 |
| <b>Date Stamp</b>             | 19 Sep 2013 12:44:16 | <b>File Name</b>             | \agn\nmr_data\AV_500\Thu3av500#0021\IPDATA\1\1r |                          |                      |
| <b>Frequency (MHz)</b>        | 500.13               | <b>Nucleus</b>               | 1H                                              | <b>Origin</b>            | spect                |
| <b>Owner</b>                  | nmr                  | <b>Points Count</b>          | 32768                                           | <b>Receiver Gain</b>     | 287.00               |
| <b>Solvent</b>                | CHLOROFORM-d         | <b>Original Points Count</b> | 20031                                           | <b>SW(cyclical) (Hz)</b> | 10000.00             |
| <b>Temperature (degree C)</b> | 23.000               | <b>Spectrum Offset (Hz)</b>  | 2219.7769                                       | <b>Spectrum Type</b>     | STANDARD             |
|                               |                      | <b>Pulse Sequence</b>        | zg30                                            | <b>Sweep Width (Hz)</b>  | 9999.70              |

THU3AV500#0021\_00011\_1h1r.ezsp

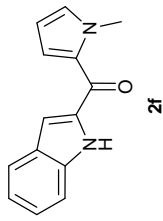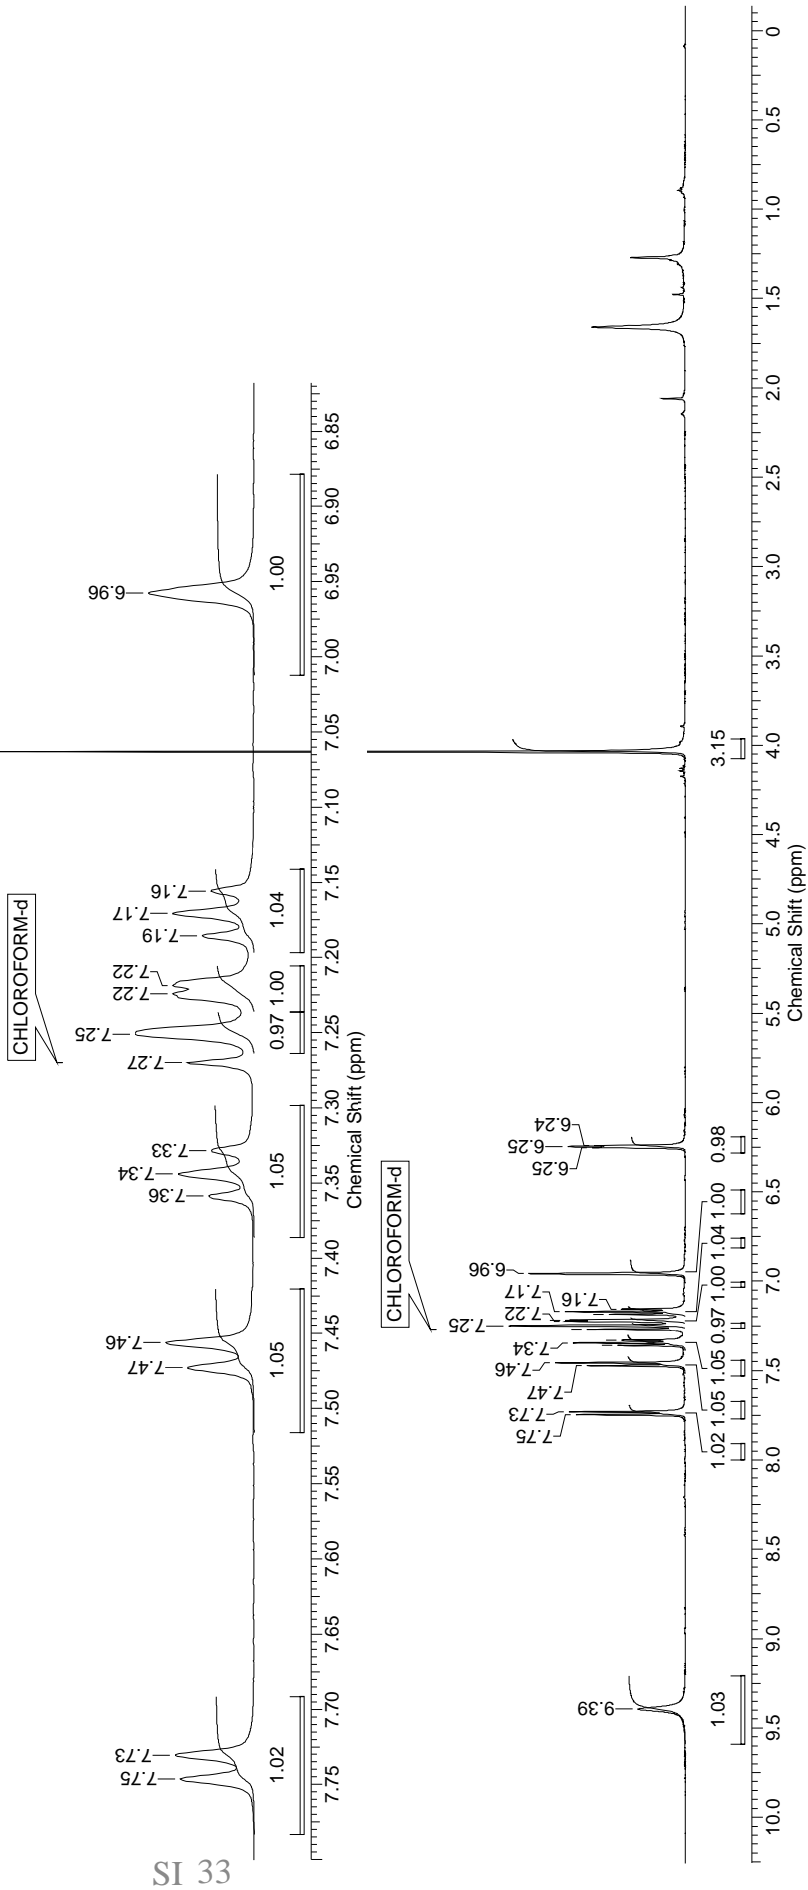

SI 33

|                               |                      |                     |              |                              |                                                   |
|-------------------------------|----------------------|---------------------|--------------|------------------------------|---------------------------------------------------|
| <b>Acquisition Time (sec)</b> | 1.0486               | <b>Comment</b>      | 13C          | <b>Date</b>                  | 19 Sep 2013 13:39:44                              |
| <b>Date Stamp</b>             | 19 Sep 2013 13:39:44 | <b>Nucleus</b>      | 13C          | <b>File Name</b>             | \\lagn\nmr_data\AV_500\Thu3av500#002\3\PDATA\111r |
| <b>Frequency (MHz)</b>        | 125.76               | <b>Points Count</b> | 32768        | <b>Number of Transients</b>  | 1175                                              |
| <b>Owner</b>                  | nmr                  | <b>Solvent</b>      | CHLOROFORM-d | <b>Pulse Sequence</b>        | zgpg30                                            |
| <b>Temperature (degree C)</b> | 23.900               |                     |              | <b>Receiver Gain</b>         | 575.00                                            |
|                               |                      |                     |              | <b>Spectrum Type</b>         | STANDARD                                          |
|                               |                      |                     |              | <b>Original Points Count</b> | 32768                                             |
|                               |                      |                     |              | <b>SW(cyclical) (Hz)</b>     | 31250.00                                          |
|                               |                      |                     |              | <b>Sweep Width (Hz)</b>      | 31249.05                                          |

Thu3av500#002.003.001.1r.esp

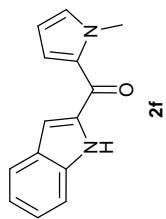

CHLOROFORM-d

-77.00

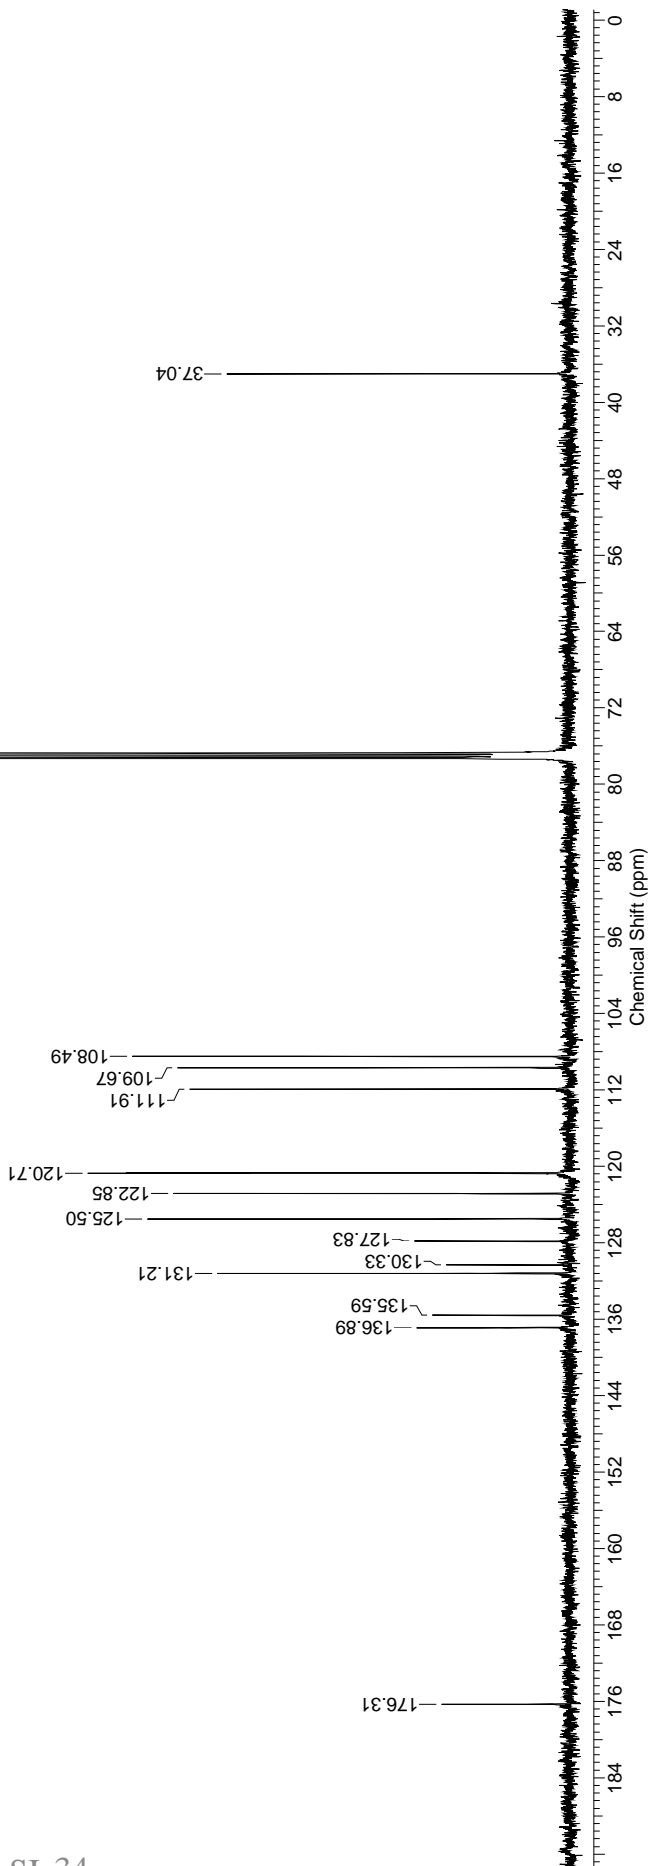

| Acquisition Time (sec) | 1.1010               | Comment      | DEPT;           | Date                  | 19 Sep 2013 12:50:40                                        |
|------------------------|----------------------|--------------|-----------------|-----------------------|-------------------------------------------------------------|
| Date Stamp             | 19 Sep 2013 12:50:40 |              |                 | File Name             | \\agninmr_data\AV_500\Sep_13_500\Thu3av500#002\2\PDATA\1\1r |
| Frequency (MHz)        | 125.76               | Nucleus      | <sup>13</sup> C | Number of Transients  | 600                                                         |
| Owner                  | nmr                  | Points Count | 32768           | Pulse Sequence        | dept135                                                     |
| Solvent                | CHLOROFORM-d         |              |                 | Receiver Gain         | 2050.00                                                     |
| Temperature (degree C) | 23.300               |              |                 | Spectrum Type         | DEPT135                                                     |
|                        |                      |              |                 | Spectrum Offset (Hz)  | 12570.3867                                                  |
|                        |                      |              |                 | Sweep Width (Hz)      | 29761.00                                                    |
|                        |                      |              |                 | Original Points Count | 32768                                                       |
|                        |                      |              |                 | SW(cyclical) (Hz)     | 29761.90                                                    |

Thu3av500#002.002.001.1r.esp

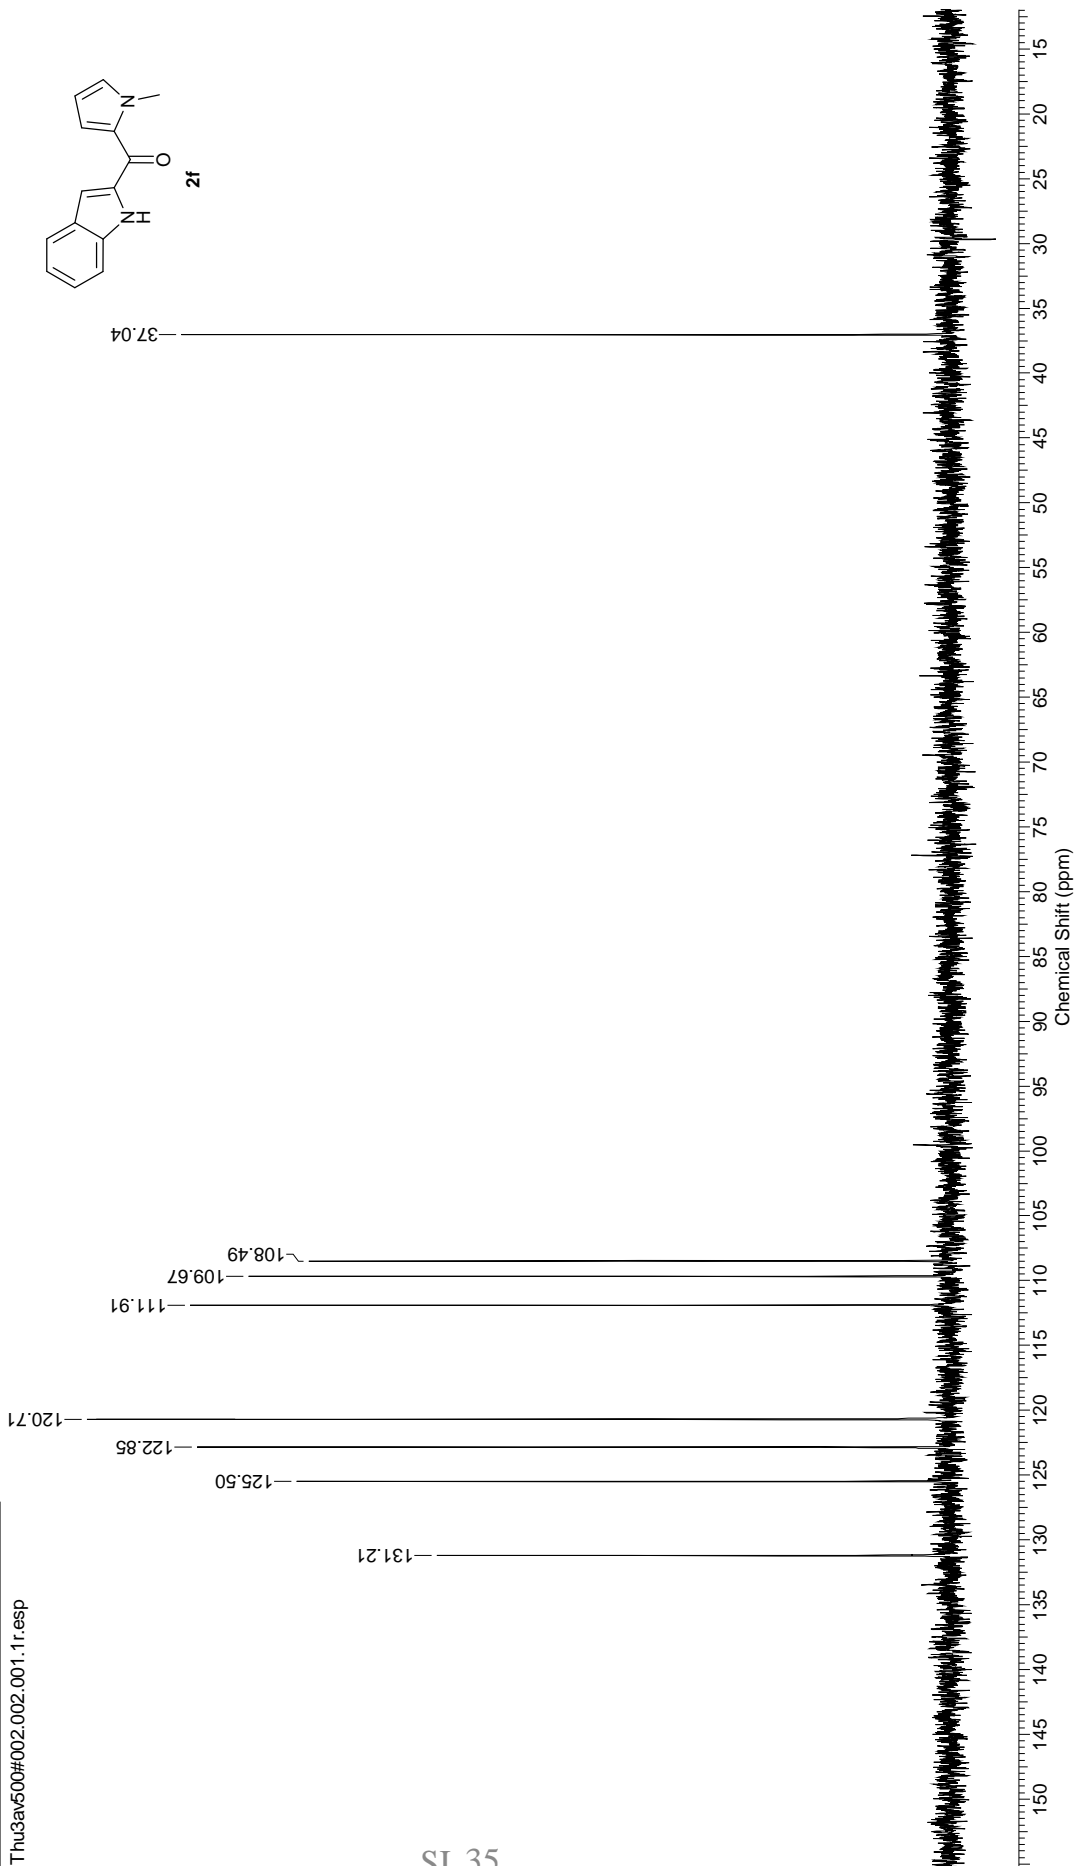

D:\Data\YM-996

12/24/2013 4:09:07 PM

YM-996 #1007 RT: 4.49 AV: 1 NL: 2.88E8  
T: FTMS + p ESI Full ms [100.00-700.00]

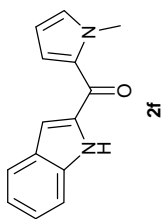

225.1021  
R=74007  
C<sup>14</sup> H<sup>13</sup> O N<sub>2</sub> = 225.1022  
-0.4321 ppm

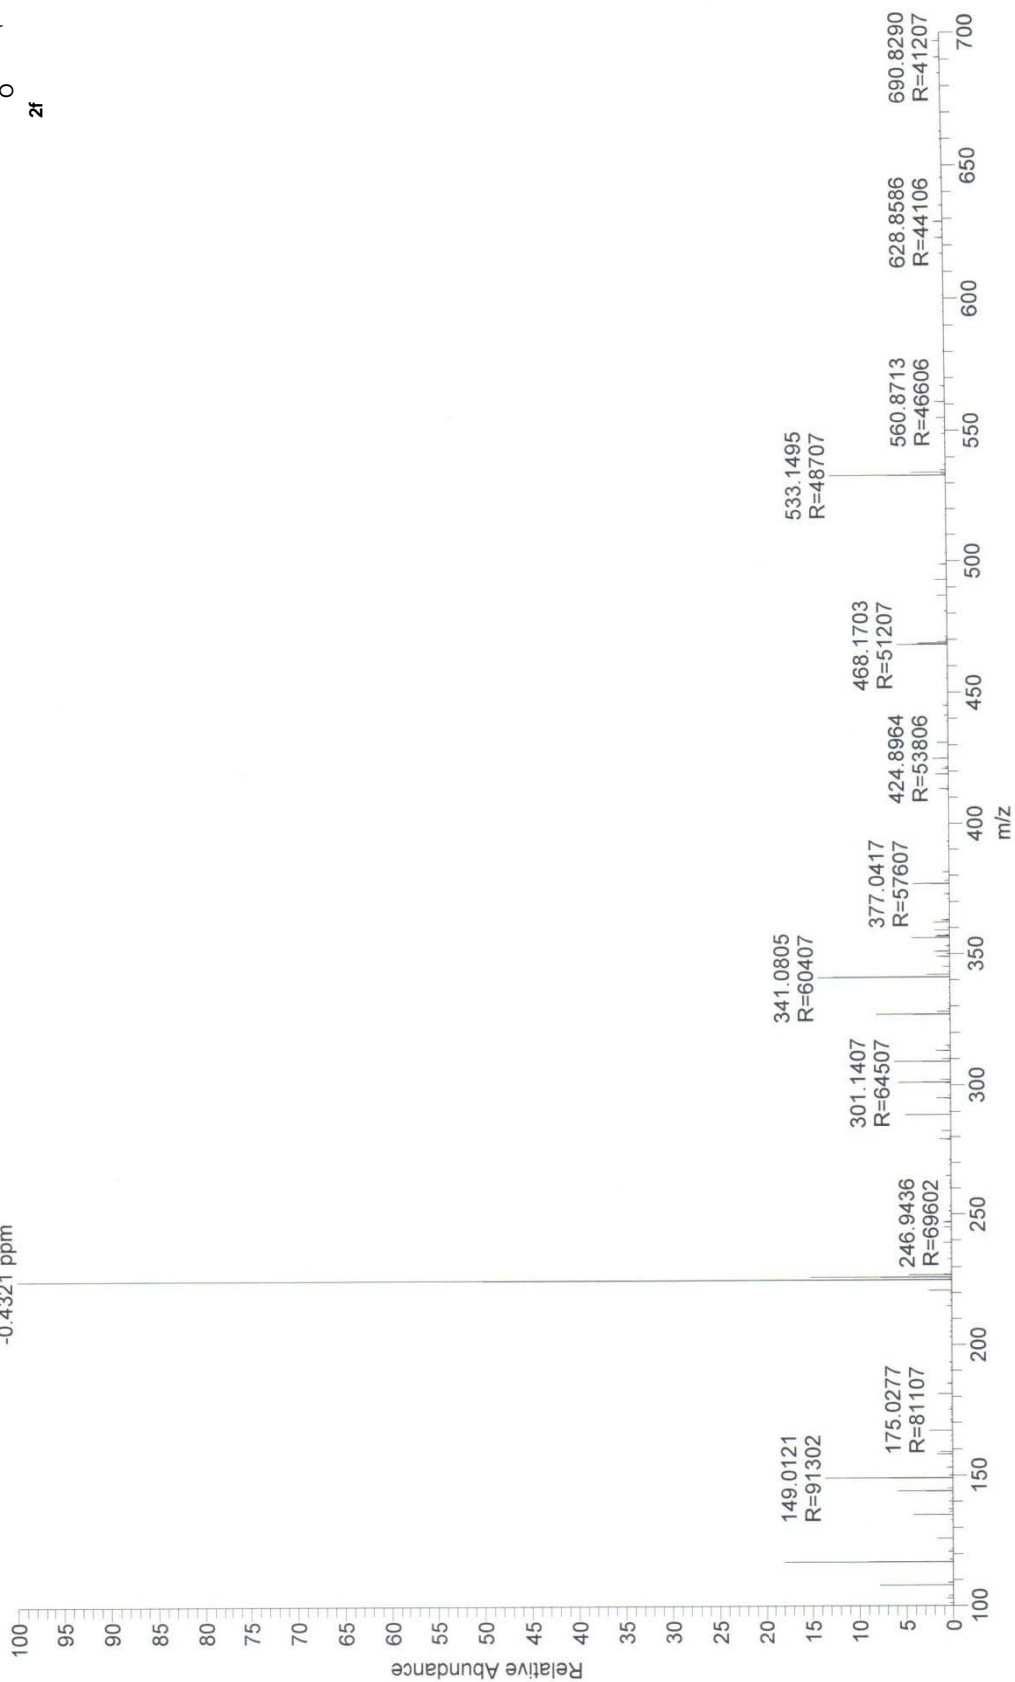



|                               |                                        |                              |          |                               |                      |                             |                      |
|-------------------------------|----------------------------------------|------------------------------|----------|-------------------------------|----------------------|-----------------------------|----------------------|
| <b>Acquisition Time (sec)</b> | 0.6488                                 | <b>Comment</b>               | 13C      | <b>Date</b>                   | 01 Aug 2013 23:47:20 | <b>Date Stamp</b>           | 01 Aug 2013 23:47:20 |
| <b>File Name</b>              | E:\New folder\Thu1av400#0103\PDATA\11r | <b>Original Points Count</b> | 16384    | <b>Frequency (MHz)</b>        | 100.61               | <b>Number of Transients</b> | 1086                 |
| <b>Origin</b>                 | spect                                  | <b>SW(cyclical) (Hz)</b>     | 25252.53 | <b>Owner</b>                  | root                 | <b>Pulse Sequence</b>       | zgpg30               |
| <b>Receiver Gain</b>          | 2050.00                                | <b>Sweep Width (Hz)</b>      | 25251.75 | <b>Solvent</b>                | CHLOROFORM-d         | <b>Spectrum Offset (Hz)</b> | 9554.7334            |
| <b>Spectrum Type</b>          | STANDARD                               |                              |          | <b>Temperature (degree C)</b> | 23.600               |                             |                      |

Thu1av400#010.003.CNMR.1r.esp

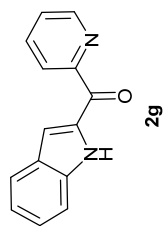

CHLOROFORM-d

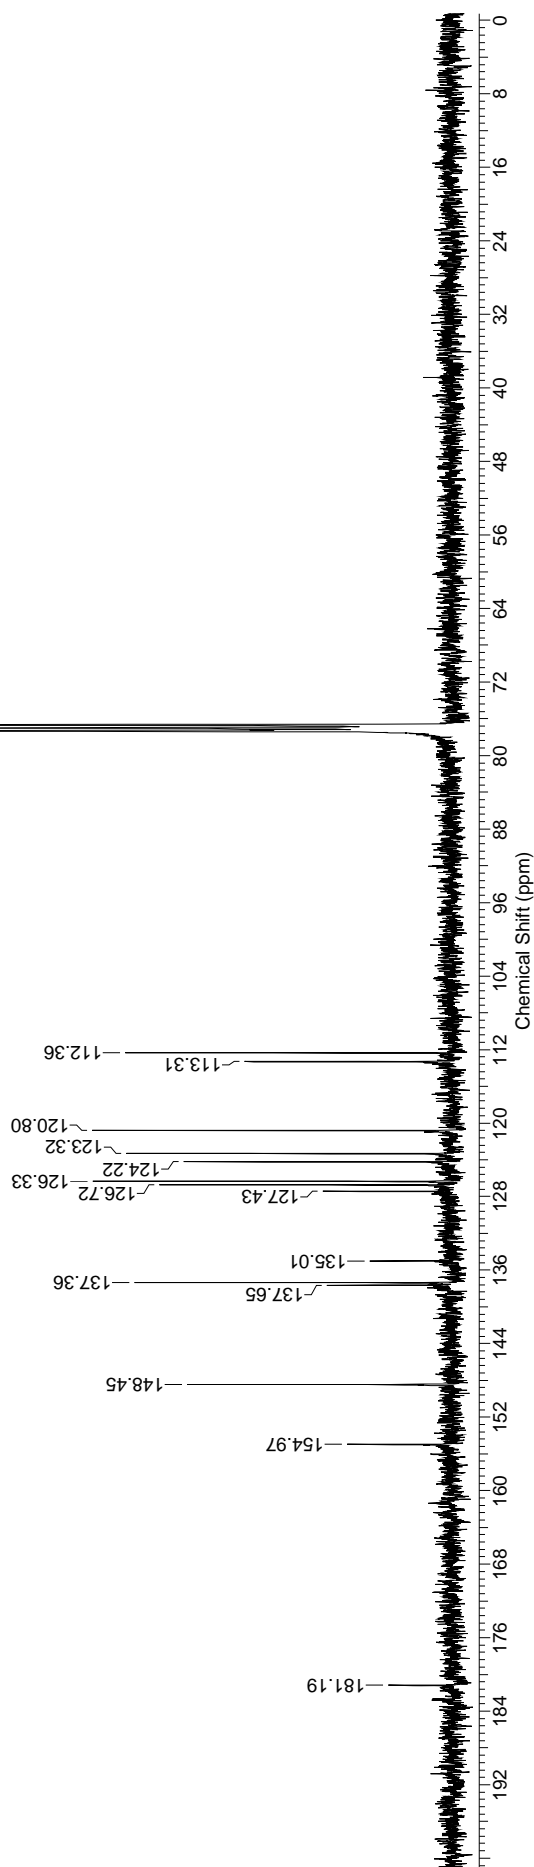

|                        |                                          |                       |          |                        |                      |                      |                      |
|------------------------|------------------------------------------|-----------------------|----------|------------------------|----------------------|----------------------|----------------------|
| Acquisition Time (sec) | 0.6488                                   | Comment               | DEPT     | Date                   | 01 Aug 2013 21:52:08 | Date Stamp           | 01 Aug 2013 21:52:08 |
| File Name              | E:\New folder\Thu1av400#010.02\PDAT\1\1r | Frequency (MHz)       | 100.61   | Nucleus                | <sup>13</sup> C      | Number of Transients | 2685                 |
| Origin                 | spect                                    | Original Points Count | 16384    | Owner                  | root                 | Pulse Sequence       | dept135              |
| Receiver Gain          | 16384.00                                 | SW(cyclical) (Hz)     | 25252.53 | Solvent                | CHLOROFORM-d         | Spectrum Offset (Hz) | 10056.7900           |
| Spectrum Type          | DEPT135                                  | Sweep Width (Hz)      | 25251.75 | Temperature (degree C) | 23.800               |                      |                      |

Thu1av400#010.002.DEPT.1r.esp

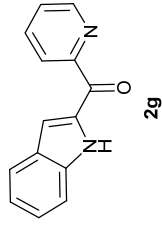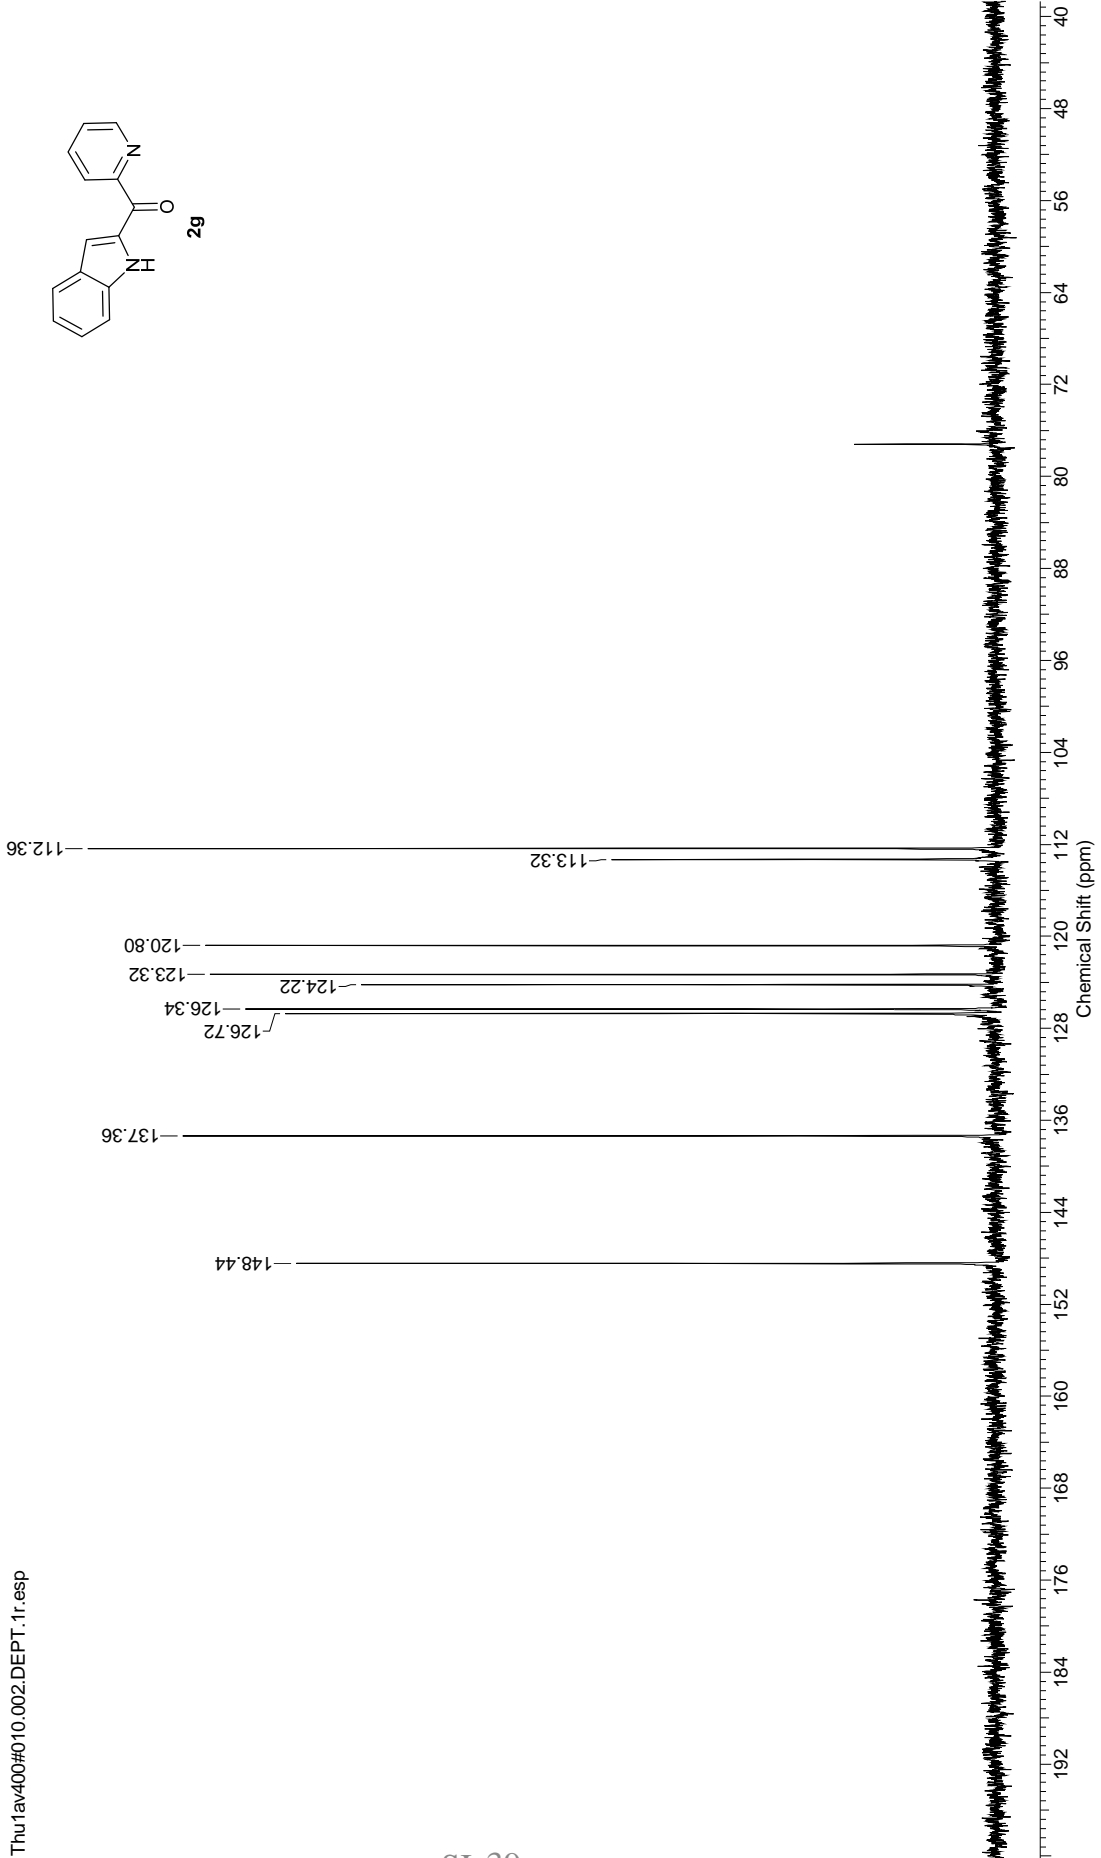

D:\Data\YM-958

9/13/2013 12:03:44 PM

YM-958 #956 RT: 4.26 AV: 1 NL: 3.92E9  
T: FTMS + p ESI Full ms [100.00-700.00]

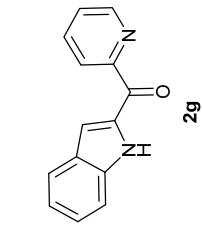

245.0688  
R=72307  
C<sub>14</sub>H<sub>10</sub>O<sub>2</sub>N<sub>2</sub>Na = 245.0685  
0.9677 ppm

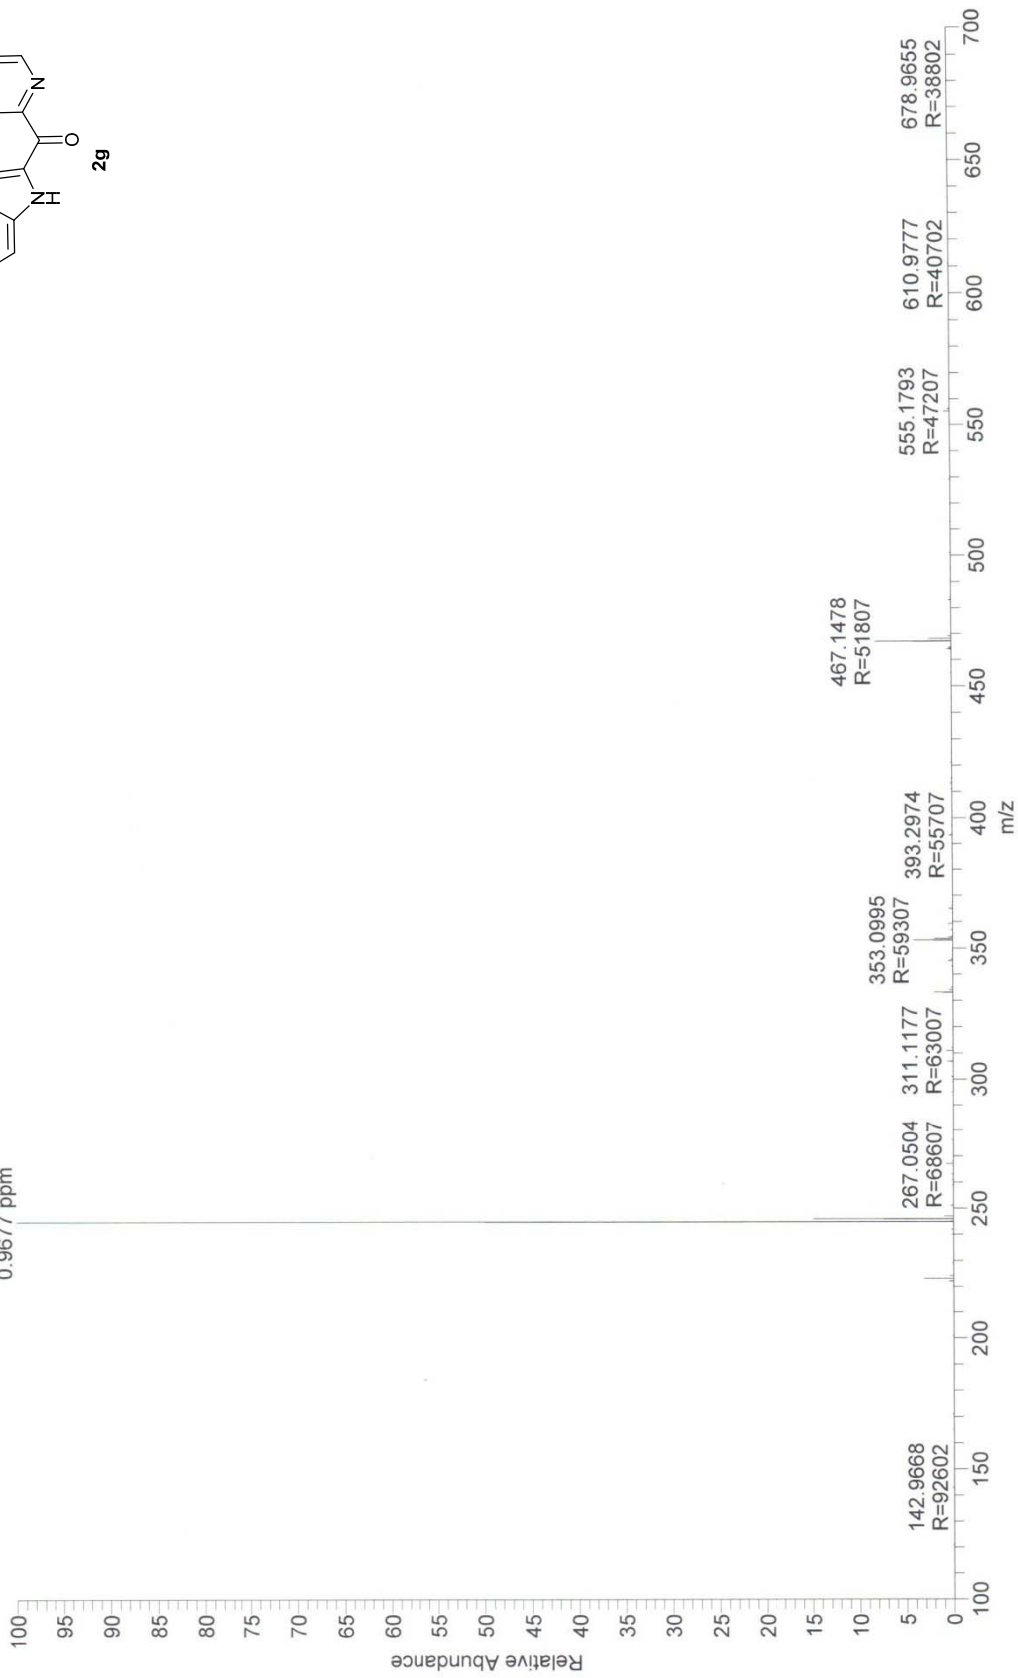



|                               |                      |                             |                                                  |                             |                      |
|-------------------------------|----------------------|-----------------------------|--------------------------------------------------|-----------------------------|----------------------|
| <b>Acquisition Time (sec)</b> | 2.0031               | <b>Comment</b>              | Anand 1H                                         | <b>Date</b>                 | 03 Sep 2013 09:17:20 |
| <b>Date Stamp</b>             | 03 Sep 2013 09:17:20 | <b>File Name</b>            | \\agn\nmr_data\AV_500\Tue1av500#001\1\PDATA\1\1r |                             |                      |
| <b>Frequency (MHz)</b>        | 500.13               | <b>Nucleus</b>              | 1H                                               | <b>Number of Transients</b> | 64                   |
| <b>Owner</b>                  | nmr                  | <b>Points Count</b>         | 32768                                            | <b>Origin</b>               | spect                |
| <b>Solvent</b>                | CHLOROFORM-d         | <b>Spectrum Type</b>        | STANDARD                                         | <b>Receiver Gain</b>        | 575.00               |
| <b>Temperature (degree C)</b> | 22.400               | <b>Spectrum Offset (Hz)</b> | 2219.7769                                        | <b>SW(cyclical) (Hz)</b>    | 10000.00             |
|                               |                      | <b>Sweep Width (Hz)</b>     | 9999.70                                          |                             |                      |

Tue1av500#001.001.001.1r.esp

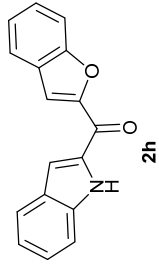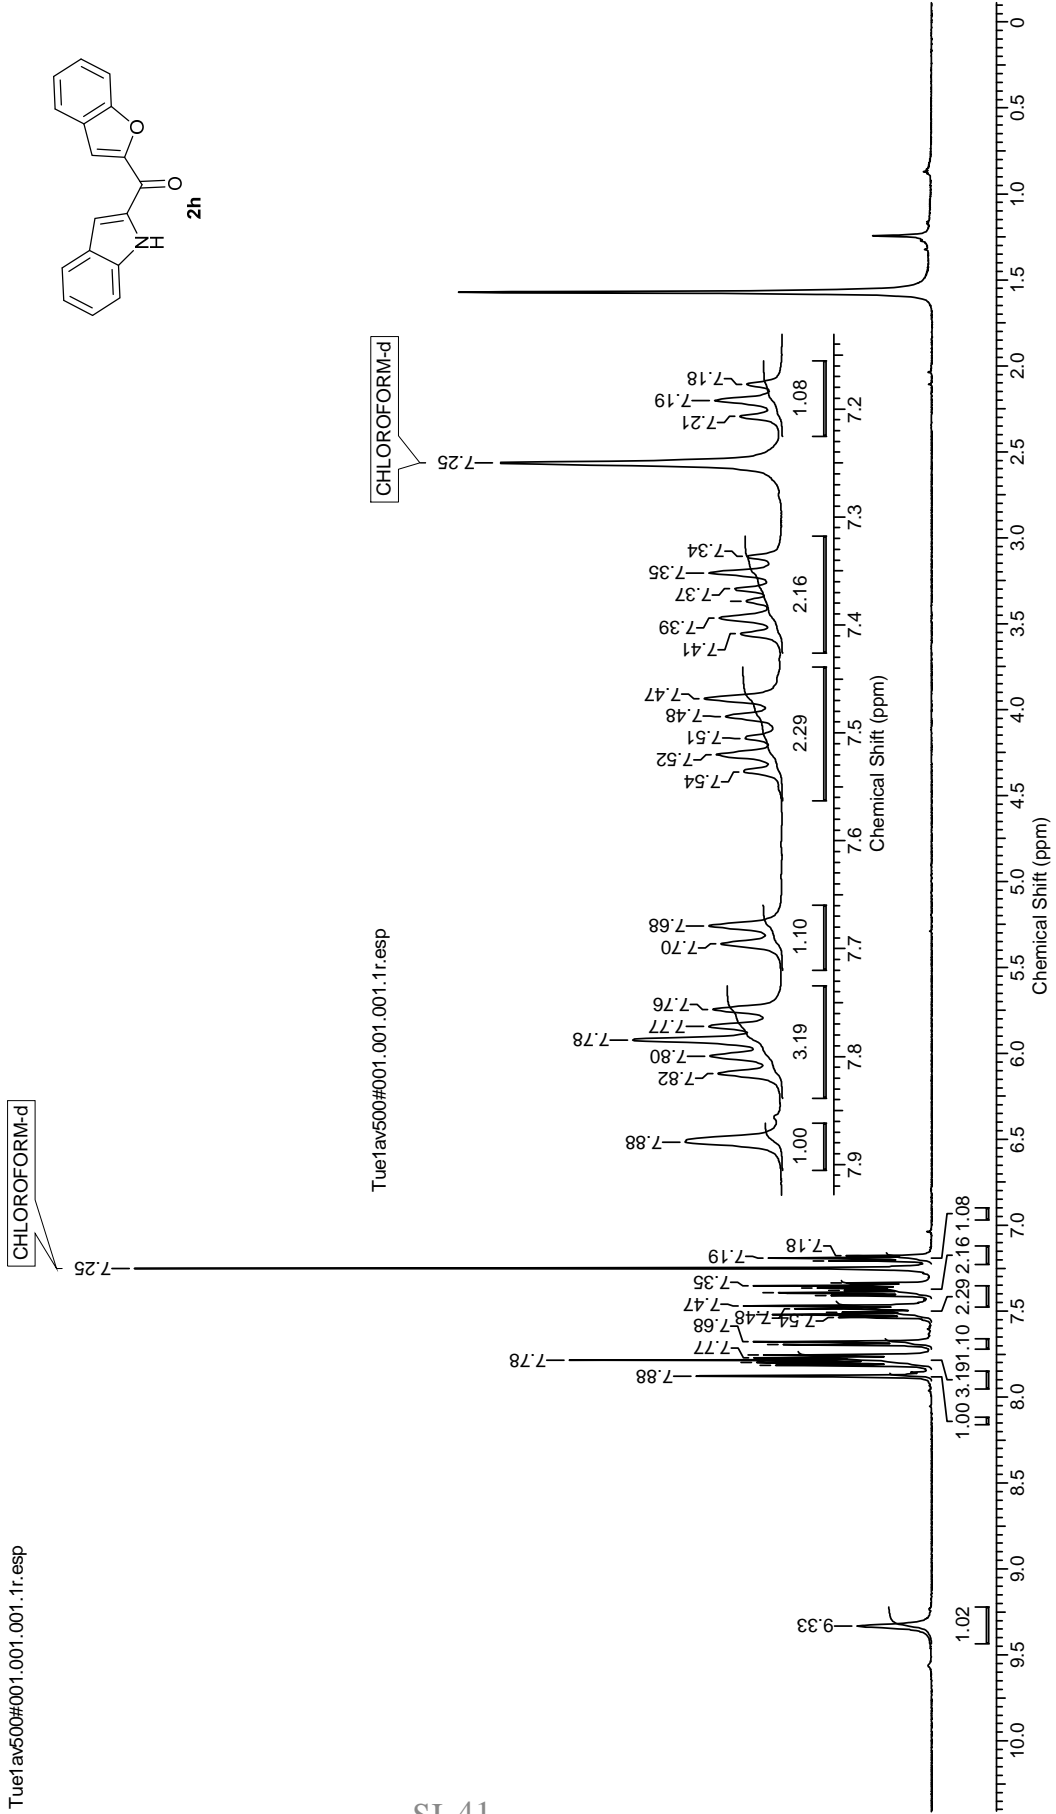

|                               |                      |                             |                                                                |                             |                      |
|-------------------------------|----------------------|-----------------------------|----------------------------------------------------------------|-----------------------------|----------------------|
| <b>Acquisition Time (sec)</b> | 1.0486               | <b>Comment</b>              | 13C                                                            | <b>Date</b>                 | 03 Sep 2013 10:23:28 |
| <b>Date Stamp</b>             | 03 Sep 2013 10:23:28 | <b>File Name</b>            | \\lagn\lmmr_data\AV_500\Sep_13_500\Tue1av500#001\3\PPDATA\1\1r |                             |                      |
| <b>Frequency (MHz)</b>        | 125.76               | <b>Nucleus</b>              | 13C                                                            | <b>Number of Transients</b> | 808                  |
| <b>Owner</b>                  | nmr                  | <b>Points Count</b>         | 32768                                                          | <b>Origin</b>               | spect                |
| <b>Solvent</b>                | CHLOROFORM-d         | <b>Spectrum Type</b>        | STANDARD                                                       | <b>Receiver Gain</b>        | 575.00               |
| <b>Temperature (degree C)</b> | 23.000               | <b>Spectrum Offset (Hz)</b> | 11983.1357                                                     | <b>SW(cyclical) (Hz)</b>    | 31250.00             |
|                               |                      |                             |                                                                | <b>Sweep Width (Hz)</b>     | 31249.05             |

Tue1av500#001.003.001.1r.esp

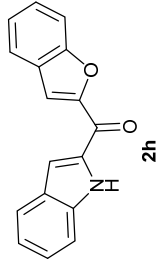

CHLOROFORM-d

Tue1av500#001.003.001.1r.esp

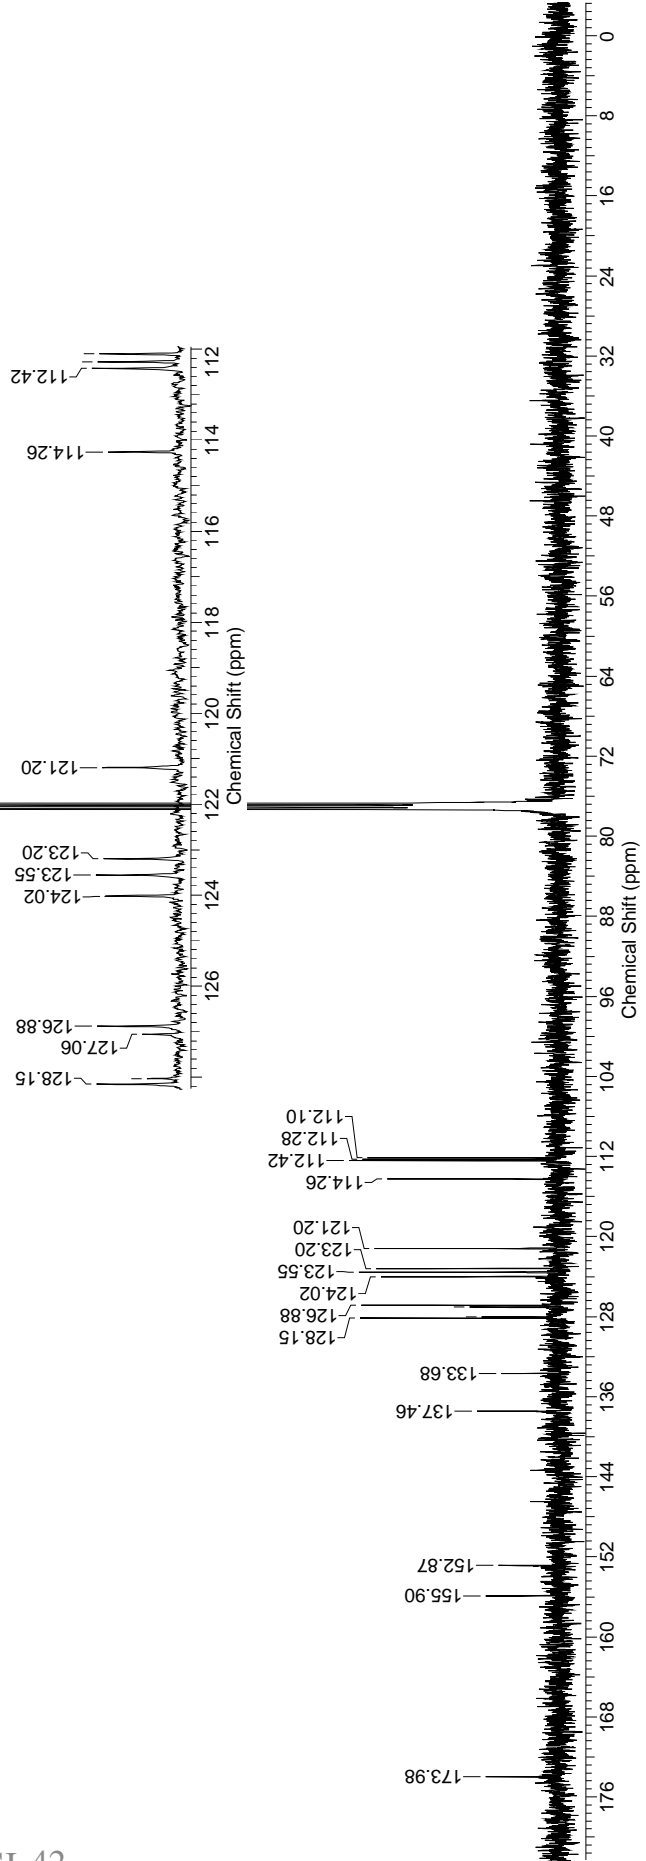

|                               |                      |                     |                 |                              |                                                             |
|-------------------------------|----------------------|---------------------|-----------------|------------------------------|-------------------------------------------------------------|
| <b>Acquisition Time (sec)</b> | 1.1010               | <b>Comment</b>      | DEPT;           | <b>Date</b>                  | 03 Sep 2013 09:51:28                                        |
| <b>Date Stamp</b>             | 03 Sep 2013 09:51:28 | <b>Nucleus</b>      | <sup>13</sup> C | <b>File Name</b>             | \\agninmr_data\AV_500\Sep_13_500\Tue1av500#001\2\PDATA\1\1r |
| <b>Frequency (MHz)</b>        | 125.76               | <b>Points Count</b> | 32768           | <b>Number of Transients</b>  | 800                                                         |
| <b>Owner</b>                  | nmr                  | <b>Solvent</b>      | CHLOROFORM-d    | <b>Pulse Sequence</b>        | dept135                                                     |
| <b>Temperature (degree C)</b> | 22.500               |                     |                 | <b>Receiver Gain</b>         | 2050.00                                                     |
|                               |                      |                     |                 | <b>Spectrum Type</b>         | DEPT135                                                     |
|                               |                      |                     |                 | <b>Spectrum Offset (Hz)</b>  | 12572.0234                                                  |
|                               |                      |                     |                 | <b>Original Points Count</b> | 32768                                                       |
|                               |                      |                     |                 | <b>SW(cyclical) (Hz)</b>     | 29761.90                                                    |
|                               |                      |                     |                 | <b>Sweep Width (Hz)</b>      | 29761.00                                                    |

Tue1av500#001.002.001.1r.esp

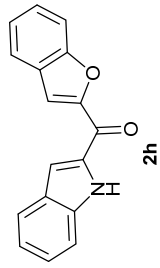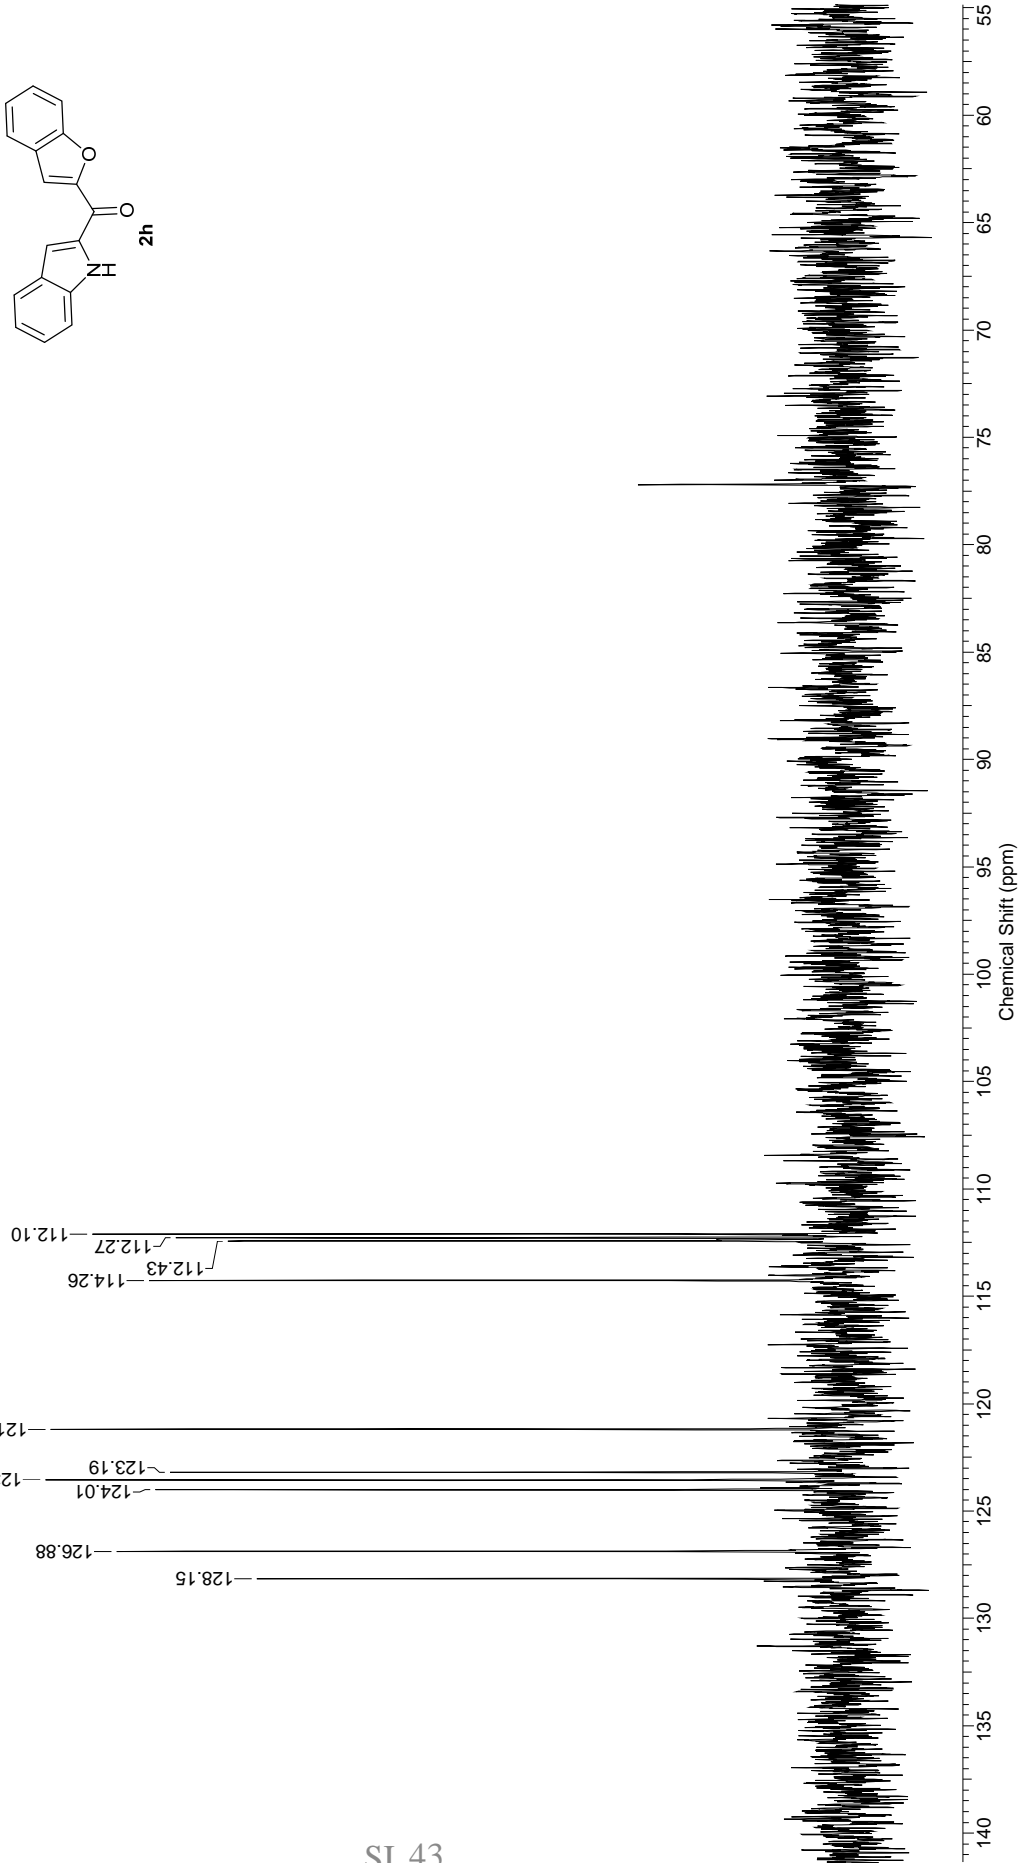

|                               |                                                |                              |           |                               |                      |                             |                      |
|-------------------------------|------------------------------------------------|------------------------------|-----------|-------------------------------|----------------------|-----------------------------|----------------------|
| <b>Acquisition Time (sec)</b> | 2.0031                                         | <b>Comment</b>               | YOGESH 1H | <b>Date</b>                   | 15 Aug 2013 15:13:36 | <b>Date Stamp</b>           | 15 Aug 2013 15:13:36 |
| <b>File Name</b>              | E:\New folder\Thu3av500#003_ym-960\1\PDATA\11r | <b>Frequency (MHz)</b>       | 500.13    | <b>Nucleus</b>                | 1H                   | <b>Number of Transients</b> | 64                   |
| <b>Origin</b>                 | spect                                          | <b>Owner</b>                 | nmr       | <b>Points Count</b>           | 32768                | <b>Pulse Sequence</b>       | zg30                 |
| <b>Receiver Gain</b>          | 362.00                                         | <b>Original Points Count</b> | 10000.00  | <b>Solvent</b>                | CHLOROFORM-d         | <b>Spectrum Offset (Hz)</b> | 2175.4456            |
| <b>Spectrum Type</b>          | STANDARD                                       | <b>SW(cyclical) (Hz)</b>     | 9999.70   | <b>Temperature (degree C)</b> | 22.400               |                             |                      |

Thu3av500#003\_ym-960.001.001.1r.esp

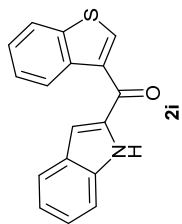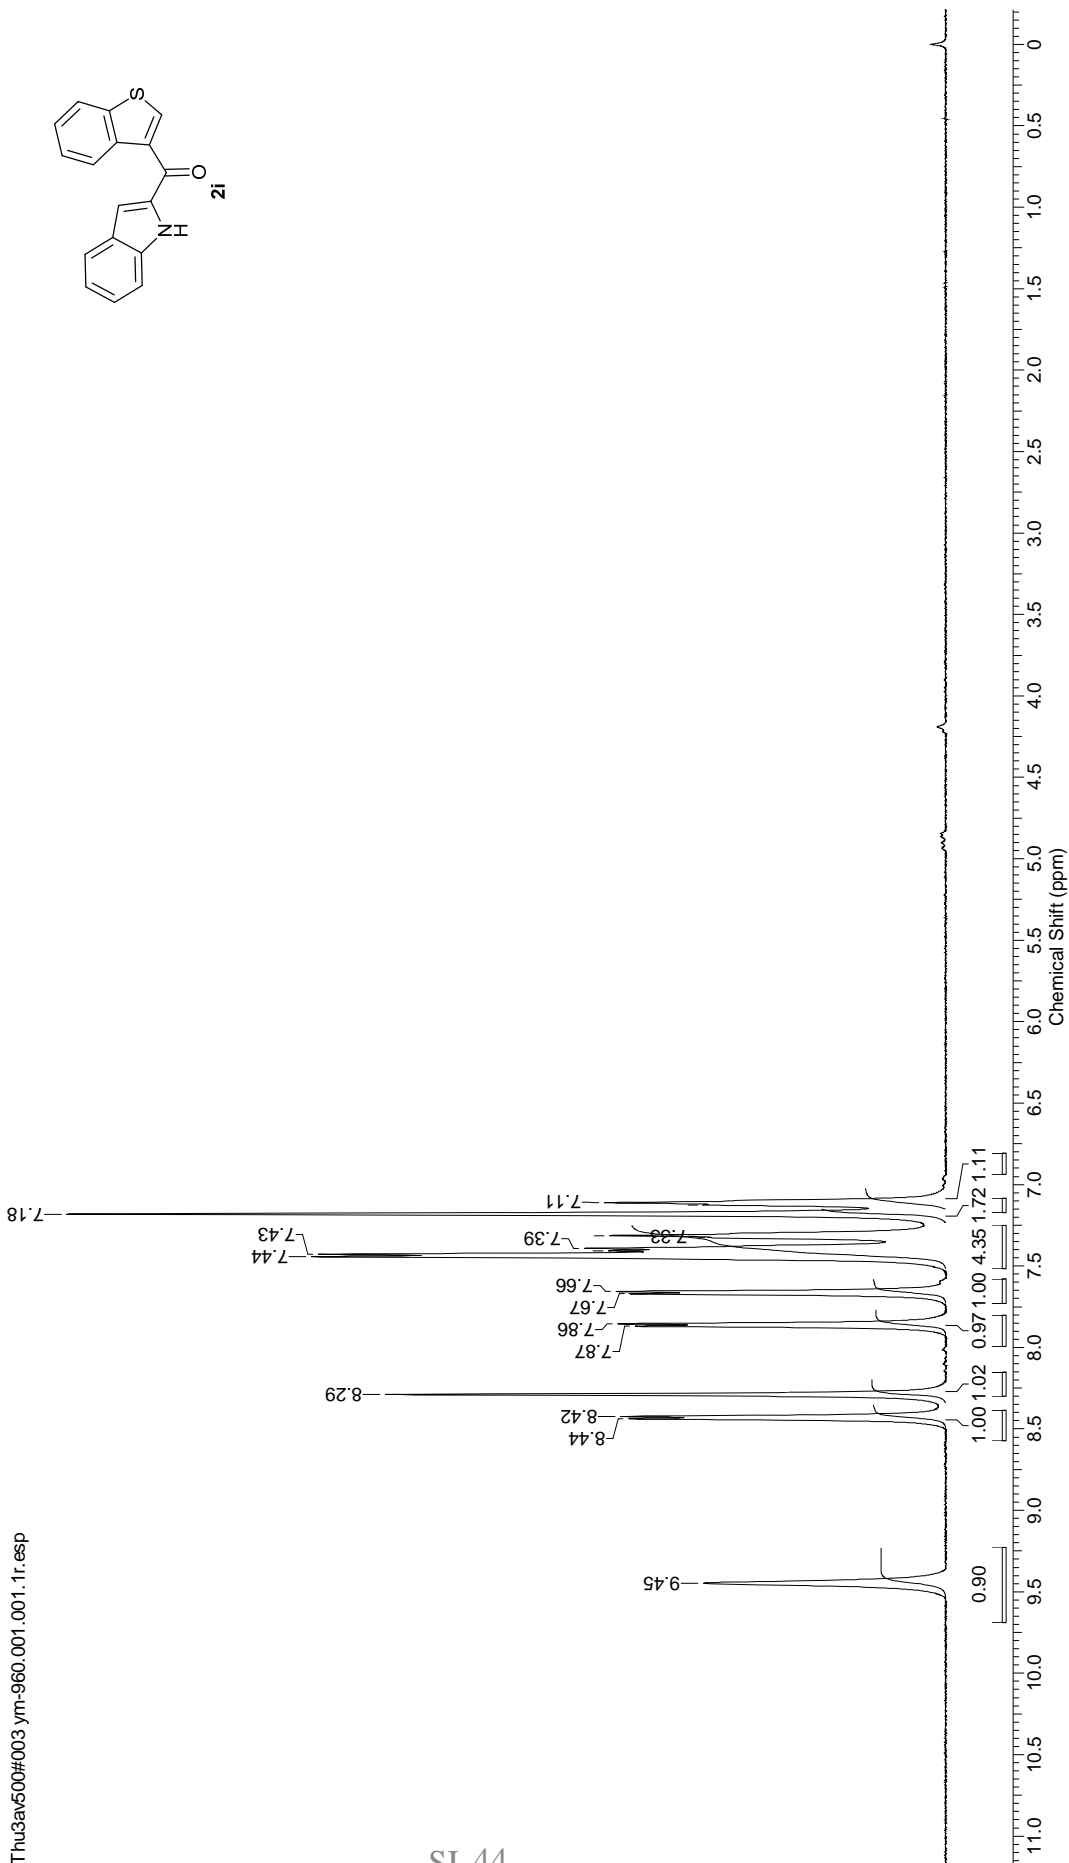



| Acquisition Time (sec) | 1.1010                                          | Comment               | DEPT;    | Date                   | 15 Aug 2013 15:39:12 | Date Stamp           | 15 Aug 2013 15:39:12 |
|------------------------|-------------------------------------------------|-----------------------|----------|------------------------|----------------------|----------------------|----------------------|
| File Name              | E:\New folder\Thu3av500#003_ym-960\2\PDATA\1\1r | Frequency (MHz)       | 125.76   | Nucleus                | 13C                  | Number of Transients | 800                  |
| Origin                 | spect                                           | Owner                 | nmr      | Points Count           | 32768                | Pulse Sequence       | dept135              |
| Receiver Gain          | 2050.00                                         | Original Points Count | 32768    | Solvent                | CHLOROFORM-d         | Spectrum Offset (Hz) | 12568.7402           |
| Spectrum Type          | DEPT135                                         | SW(cyclical) (Hz)     | 29761.90 | Temperature (degree C) | 22.700               |                      |                      |
|                        |                                                 | Sweep Width (Hz)      | 29761.00 |                        |                      |                      |                      |

Thu3av500#003\_ym-960.002.001\_1r.esp

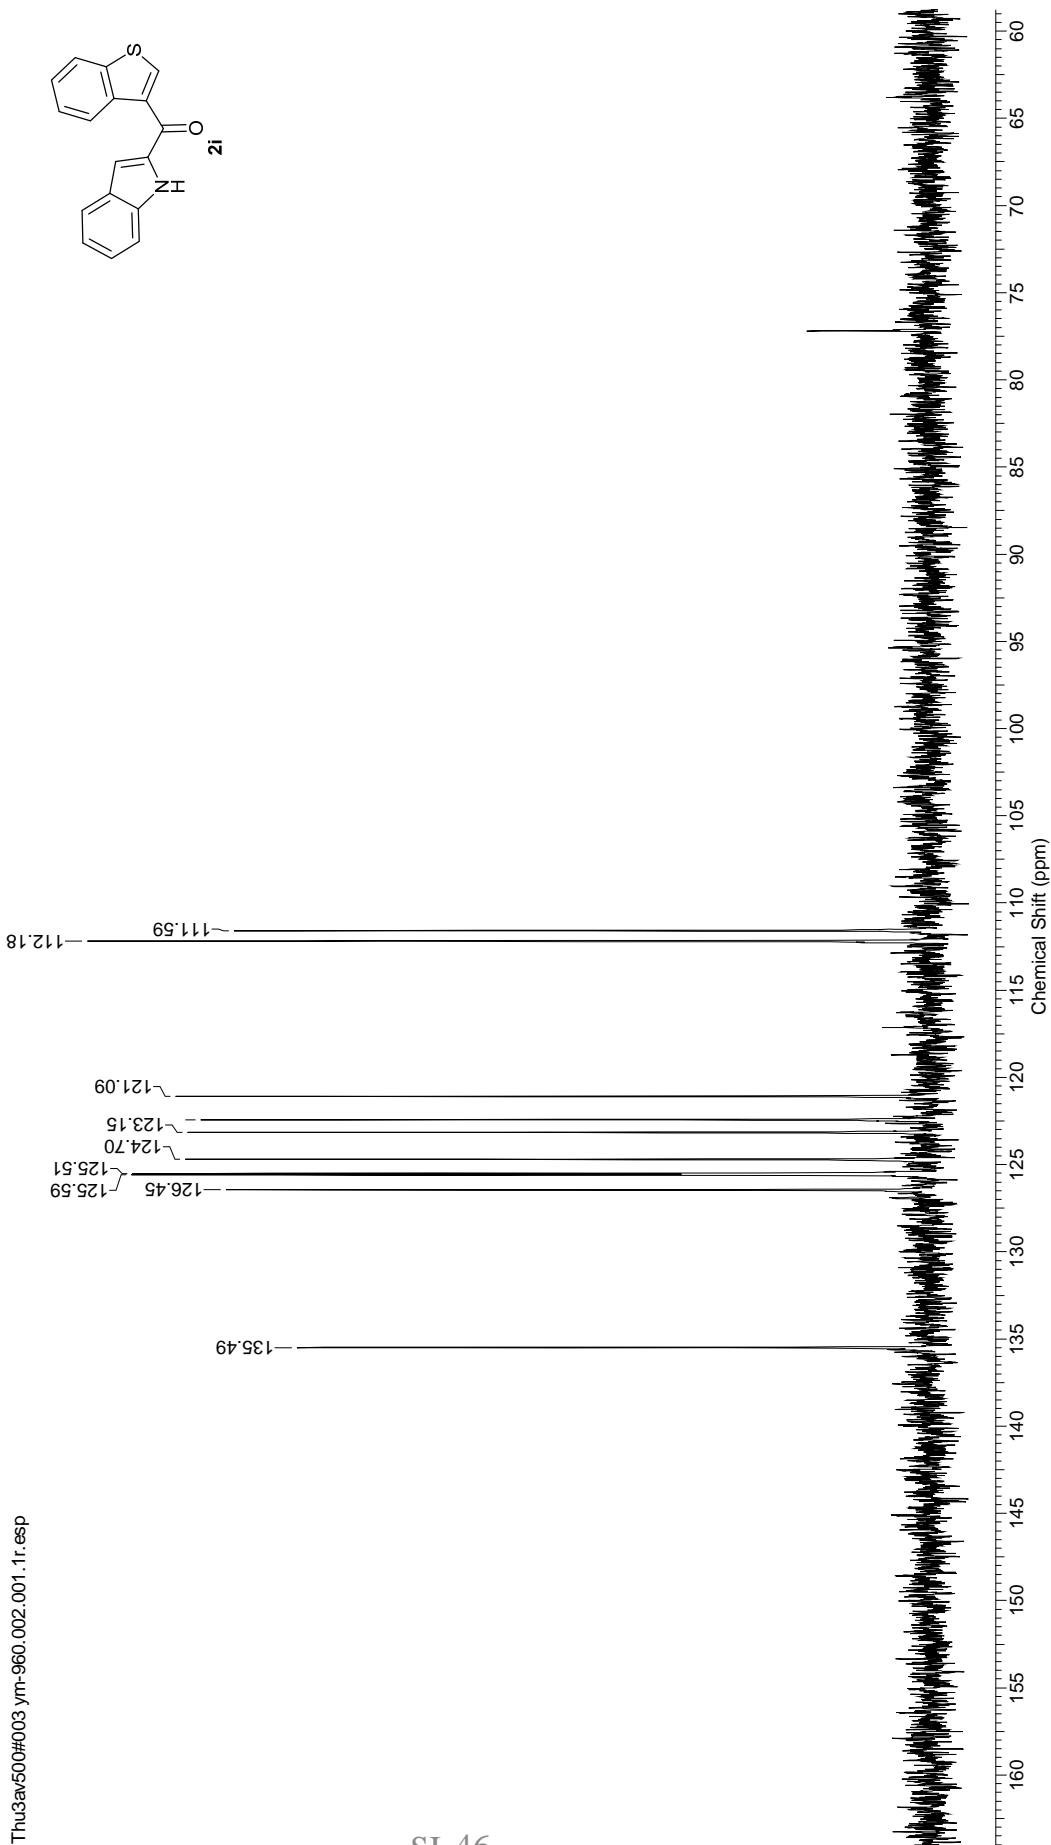

D:\Data\YM-960

9/13/2013 11:52:33 AM

YM-960 #1163 RT: 5.18 AV: 1 NL: 4.32E6  
T: FTMS + p ESI Full ms [100.00-700.00]

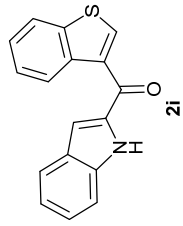

278.0634  
R=67407  
C<sub>17</sub>H<sub>12</sub>O N S = 278.0634  
0.1251 ppm

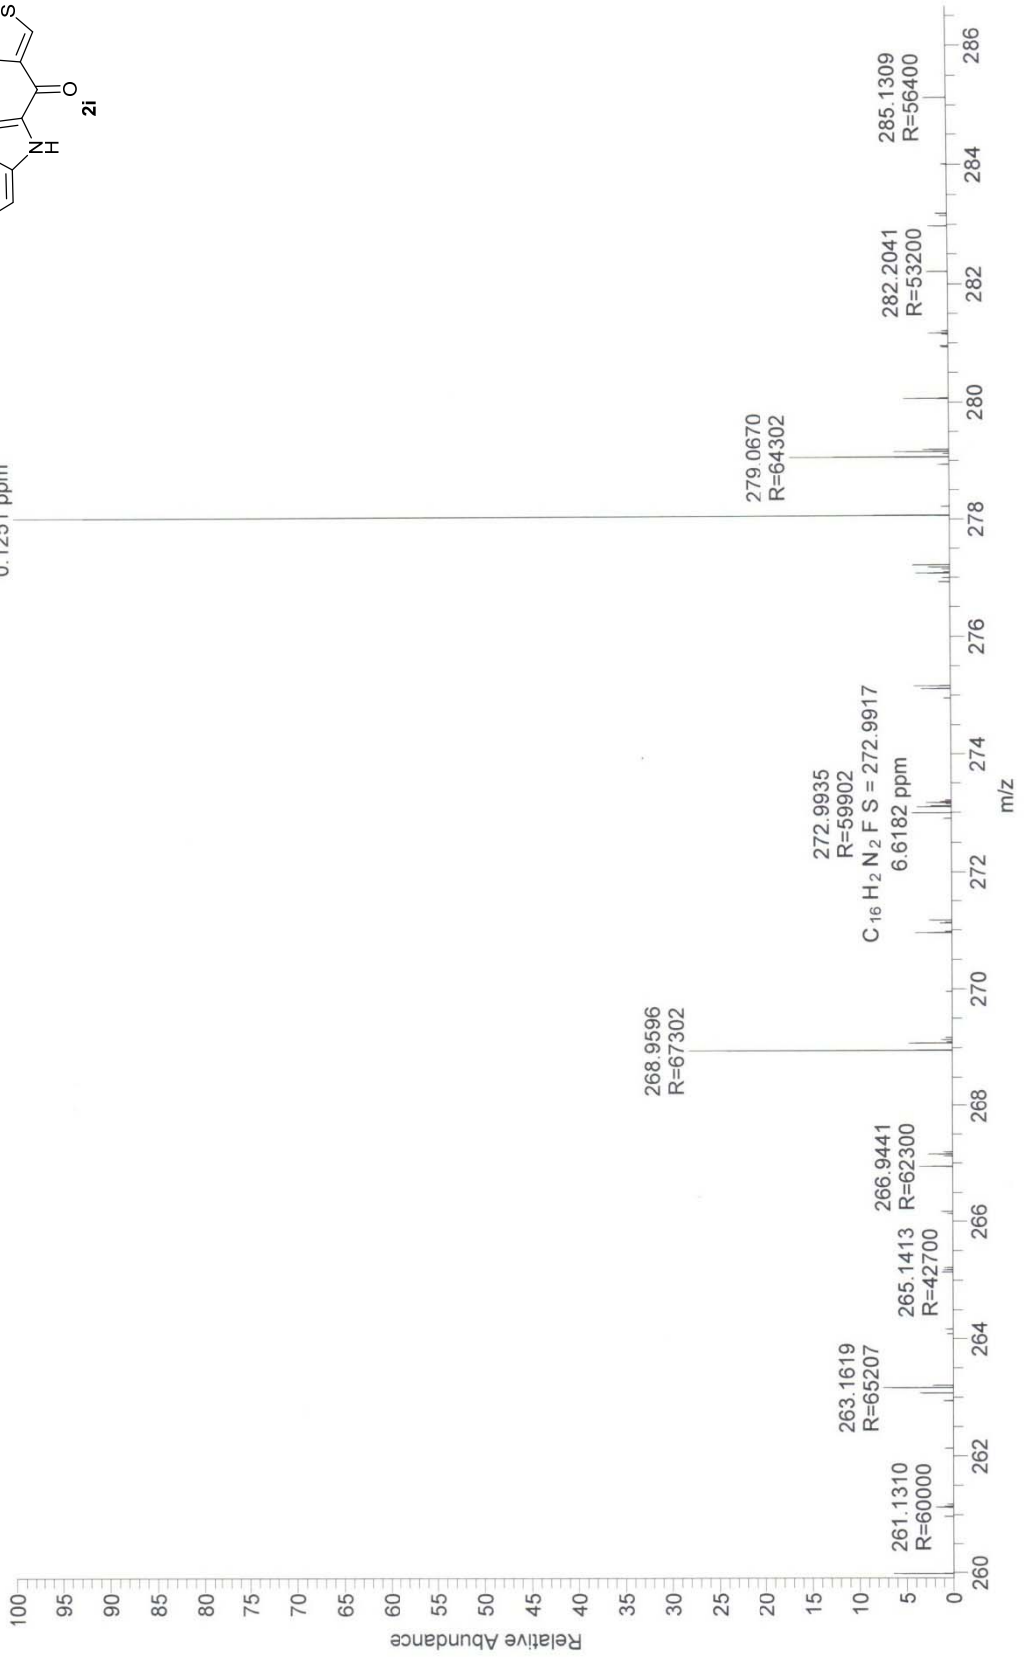

|                               |                      |                              |                                                              |                          |                      |
|-------------------------------|----------------------|------------------------------|--------------------------------------------------------------|--------------------------|----------------------|
| <b>Acquisition Time (sec)</b> | 2.0031               | <b>Comment</b>               | Yogesh 1H                                                    | <b>Date</b>              | 10 Sep 2013 09:57:52 |
| <b>Date Stamp</b>             | 10 Sep 2013 09:57:52 | <b>File Name</b>             | \\agni\nmr_data\AV_500\Sep_13_500\Tue2av500#001\1\IPDATA1\1r |                          |                      |
| <b>Frequency (MHz)</b>        | 500.13               | <b>Nucleus</b>               | 1H                                                           | <b>Origin</b>            | spect                |
| <b>Owner</b>                  | nmr                  | <b>Points Count</b>          | 32768                                                        | <b>Receiver Gain</b>     | 575.00               |
| <b>Solvent</b>                | CHLOROFORM-d         | <b>Spectrum Offset (Hz)</b>  | 2219.7769                                                    | <b>Spectrum Type</b>     | STANDARD             |
| <b>Temperature (degree C)</b> | 23.200               | <b>Original Points Count</b> | 20031                                                        | <b>SW(cyclical) (Hz)</b> | 10000.00             |
|                               |                      | <b>Sweep Width (Hz)</b>      | 9999.70                                                      |                          |                      |

Tue2av500#001.001.001.1r.resp

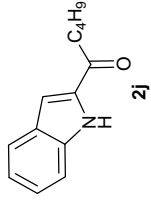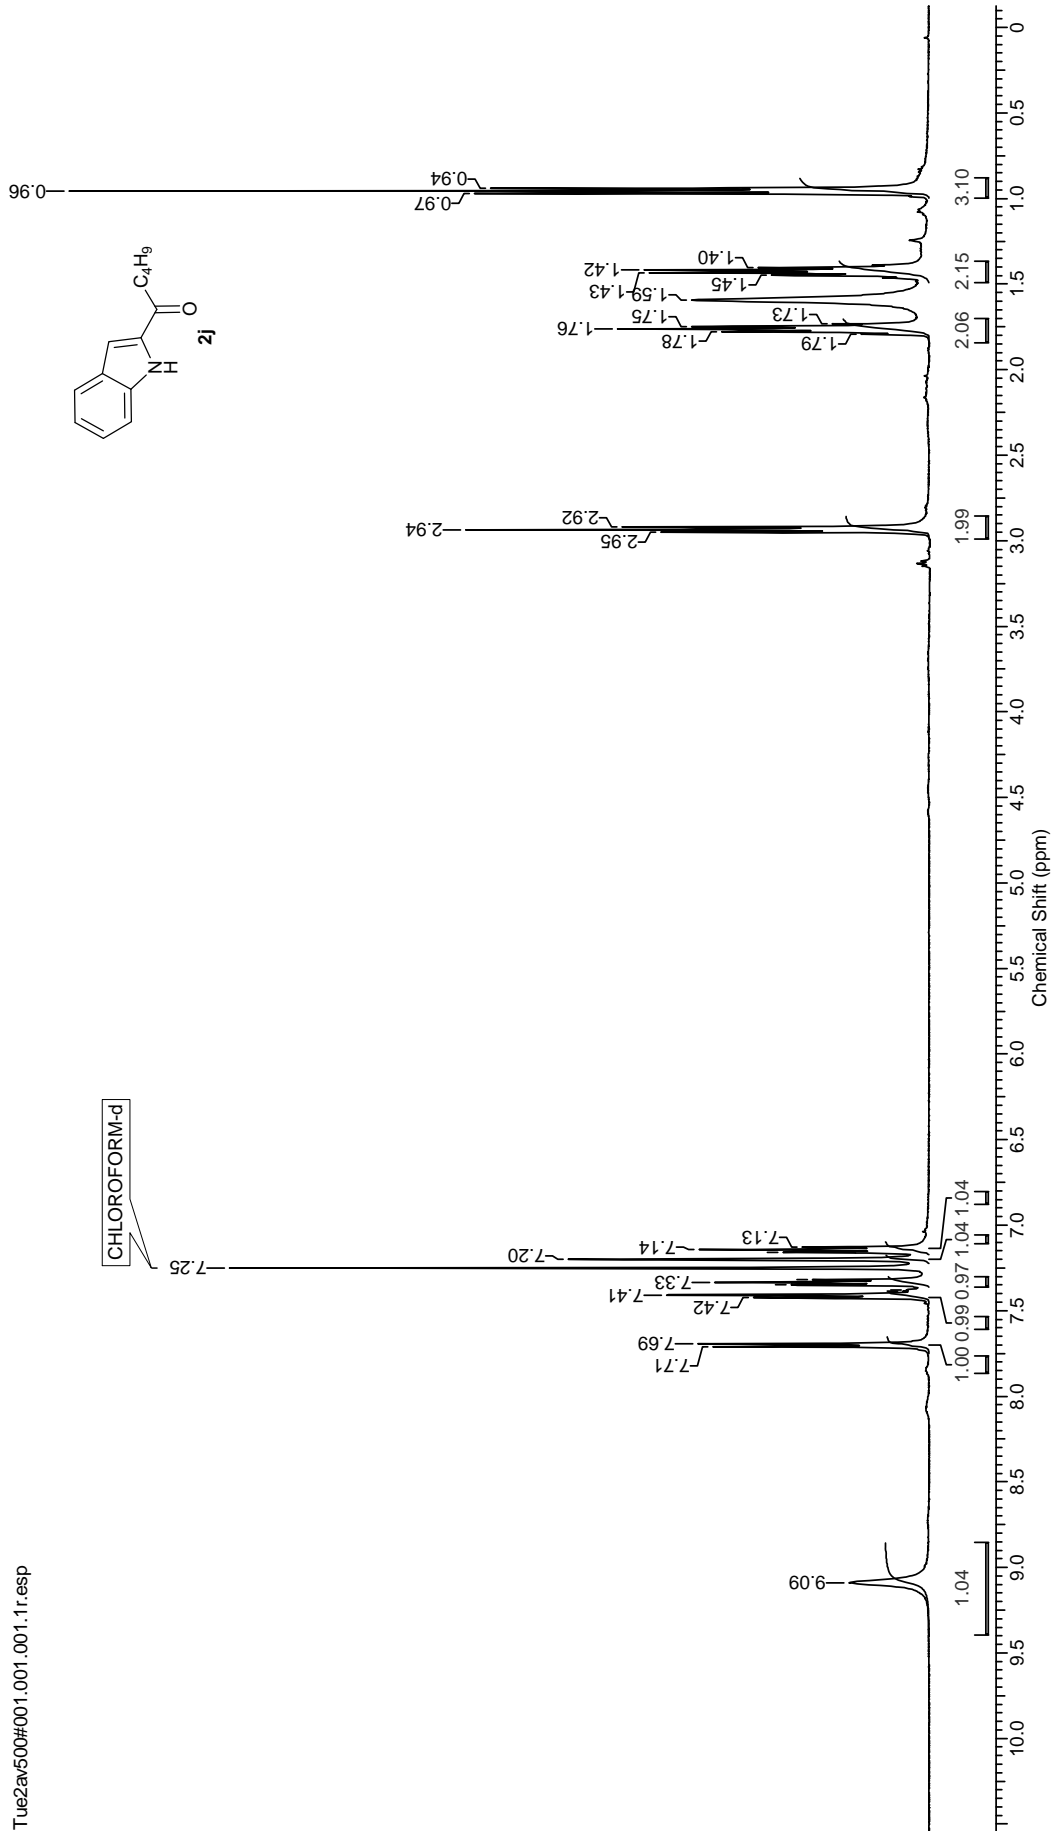



|                               |                      |                              |                                                              |
|-------------------------------|----------------------|------------------------------|--------------------------------------------------------------|
| <b>Acquisition Time (sec)</b> | 1.0486               | <b>Date</b>                  | 10 Sep 2013 10:46:56                                         |
| <b>Date Stamp</b>             | 10 Sep 2013 10:46:56 | <b>File Name</b>             | \\agn1\nmr_data\AV_500\Sep_13_500\Tue2av500#001\3\PDATA\1\1r |
| <b>Frequency (MHz)</b>        | 125.76               | <b>Nucleus</b>               | <sup>13</sup> C                                              |
| <b>Owner</b>                  | nmr                  | <b>Points Count</b>          | 32768                                                        |
| <b>Solvent</b>                | CHLOROFORM-d         | <b>Number of Transients</b>  | 522                                                          |
| <b>Temperature (degree C)</b> | 24.100               | <b>Pulse Sequence</b>        | zpg30                                                        |
|                               |                      | <b>Receiver Gain</b>         | 575.00                                                       |
|                               |                      | <b>Spectrum Type</b>         | STANDARD                                                     |
|                               |                      | <b>Original Points Count</b> | 32768                                                        |
|                               |                      | <b>SW(cyclical) (Hz)</b>     | 31250.00                                                     |
|                               |                      | <b>Sweep Width (Hz)</b>      | 31249.05                                                     |

Tue2av500#001.003.001.1r.esp

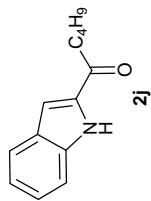

CHLOROFORM-d

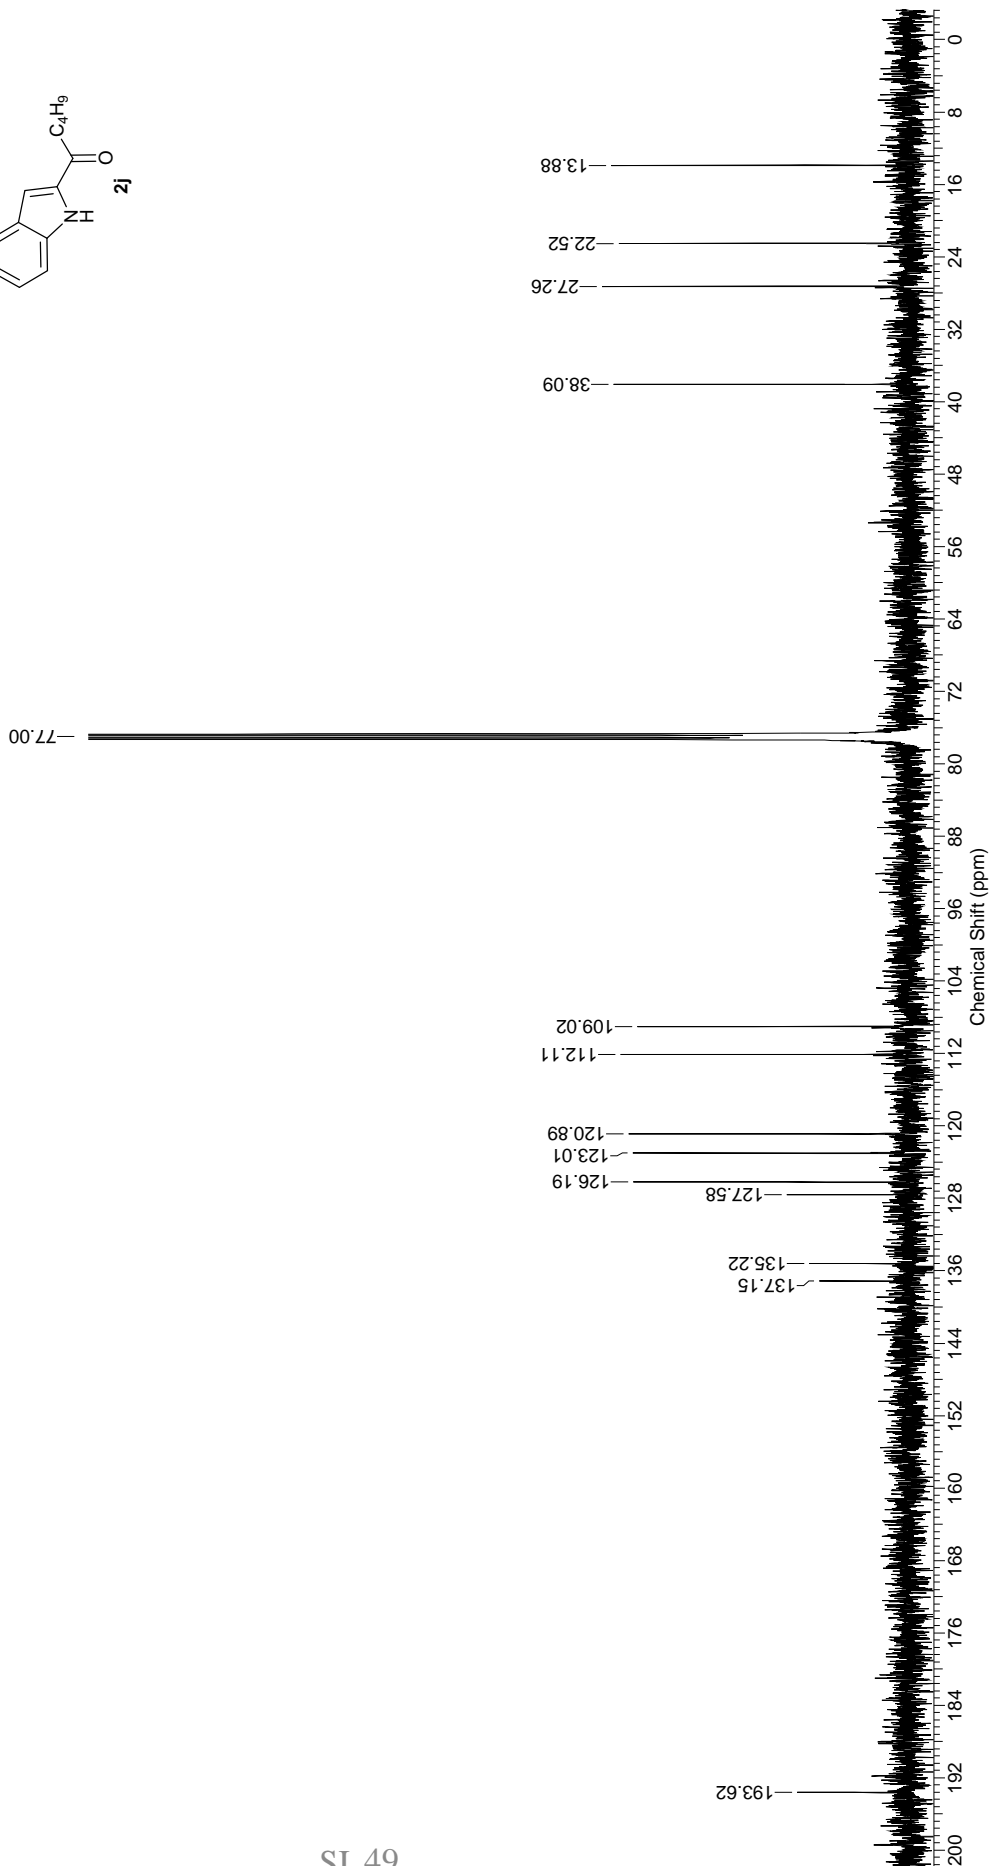

|                               |                      |                              |                                                  |
|-------------------------------|----------------------|------------------------------|--------------------------------------------------|
| <b>Acquisition Time (sec)</b> | 1.1010               | <b>Comment</b>               | DEPT;                                            |
| <b>Date Stamp</b>             | 10 Sep 2013 10:21:20 | <b>File Name</b>             | \\agn\nmr_data\AV_500\Tue2av500#001\2\PDATA\1\1r |
| <b>Frequency (MHz)</b>        | 125.76               | <b>Nucleus</b>               | <sup>13</sup> C                                  |
| <b>Owner</b>                  | nmr                  | <b>Points Count</b>          | 32768                                            |
| <b>Solvent</b>                | CHLOROFORM-d         | <b>Pulse Sequence</b>        | dept135                                          |
| <b>Temperature (degree C)</b> | 23.500               | <b>Spectrum Offset (Hz)</b>  | 12570.6299                                       |
|                               |                      | <b>Spectrum Type</b>         | DEPT135                                          |
|                               |                      | <b>Original Points Count</b> | 32768                                            |
|                               |                      | <b>SW(cyclical) (Hz)</b>     | 29761.90                                         |
|                               |                      | <b>Sweep Width (Hz)</b>      | 29761.00                                         |

Tue2av500#001.002.001.1r.esp

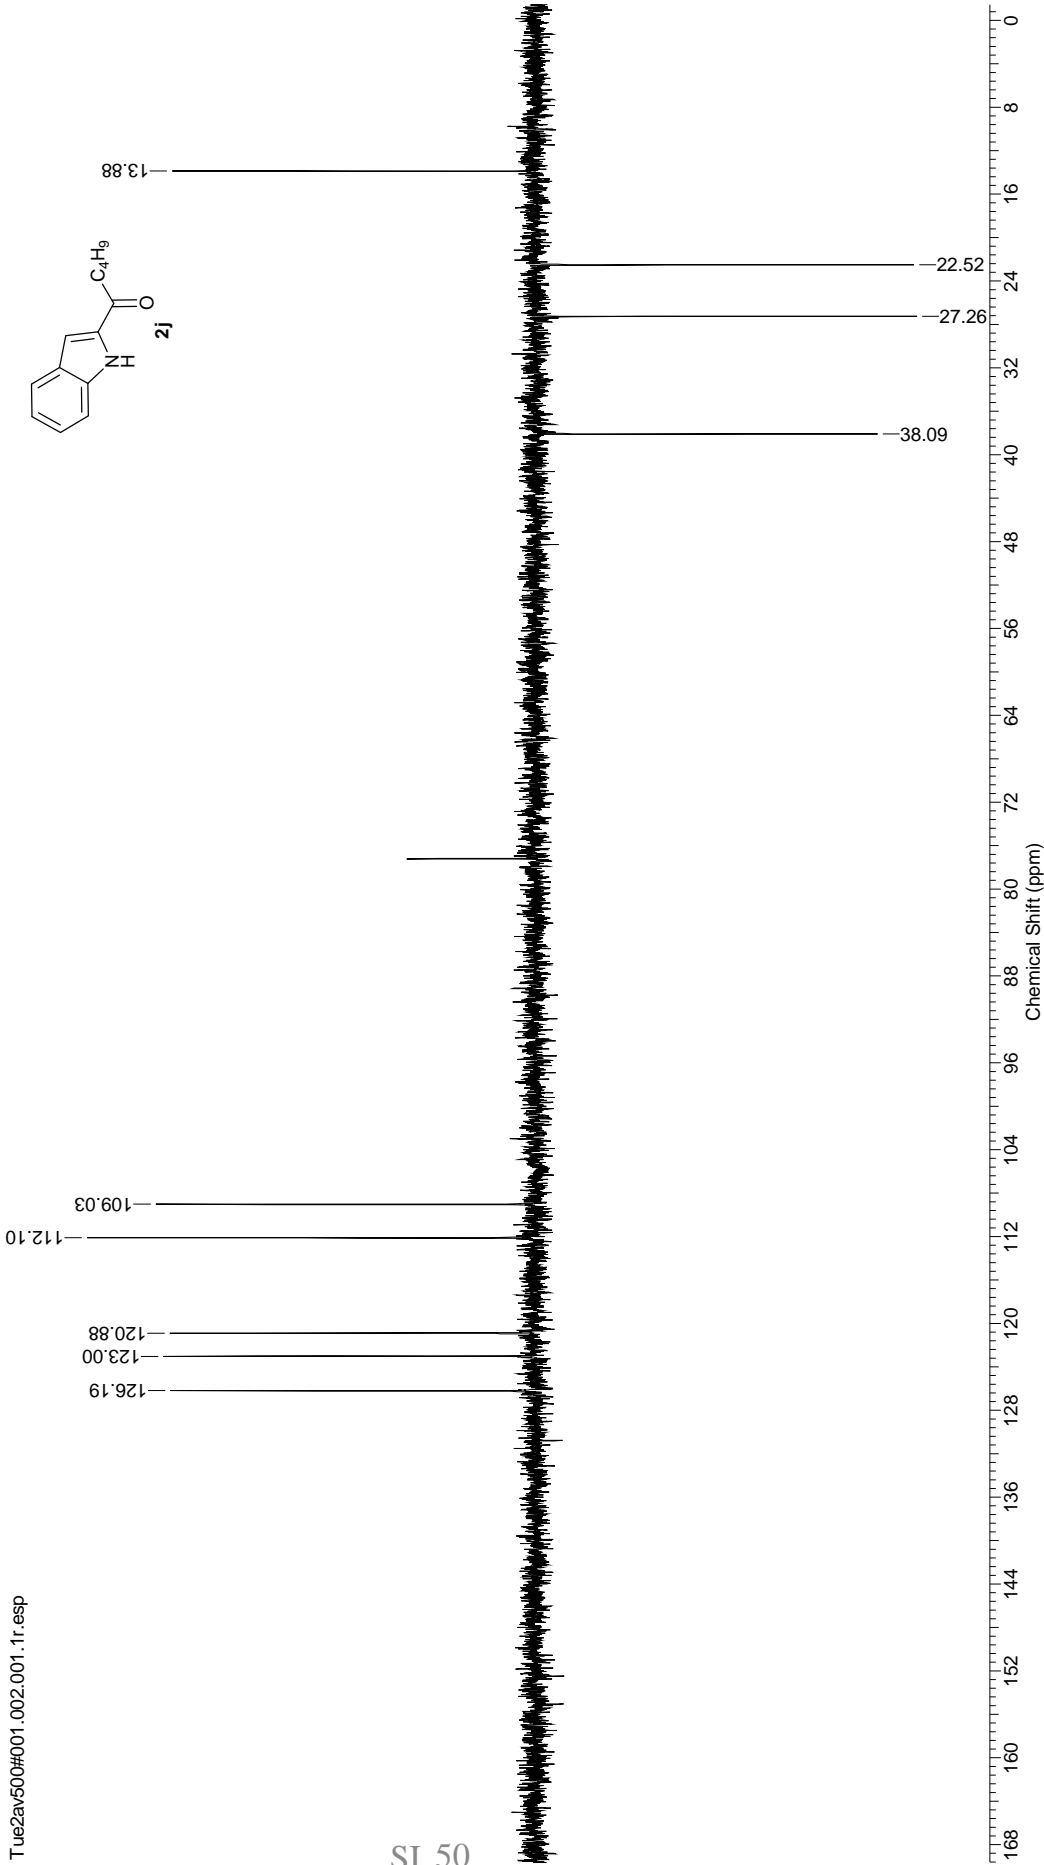

|                               |                      |                          |                                                                                   |                               |                      |
|-------------------------------|----------------------|--------------------------|-----------------------------------------------------------------------------------|-------------------------------|----------------------|
| <b>Acquisition Time (sec)</b> | 3.9584               | <b>Comment</b>           | Yogesh                                                                            | <b>Date</b>                   | 26 Aug 2013 23:17:28 |
| <b>Date Stamp</b>             | 26 Aug 2013 23:17:28 | <b>File Name</b>         | \\agn1\nmr_data\AV200\AUG_13\AV200\data\administrator\nmr\Mon5av2#08111\PDATA111r |                               |                      |
| <b>Frequency (MHz)</b>        | 200.13               | <b>Nucleus</b>           | 1H                                                                                | <b>Origin</b>                 | av200                |
| <b>Original Points Count</b>  | 16384                | <b>Owner</b>             | Administrator                                                                     | <b>Pulse Sequence</b>         | zg30                 |
| <b>Receiver Gain</b>          | 1149.40              | <b>SW(cyclical) (Hz)</b> | 4139.07                                                                           | <b>Solvent</b>                | CHLOROFORM-d         |
| <b>Spectrum Offset (Hz)</b>   | 1229.5370            | <b>Spectrum Type</b>     | STANDARD                                                                          | <b>Sweep Width (Hz)</b>       | 4138.95              |
|                               |                      |                          |                                                                                   | <b>Temperature (degree C)</b> | 27.000               |

Mon5av2#081.001.001.11.resp

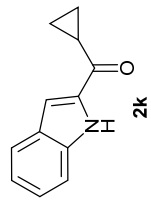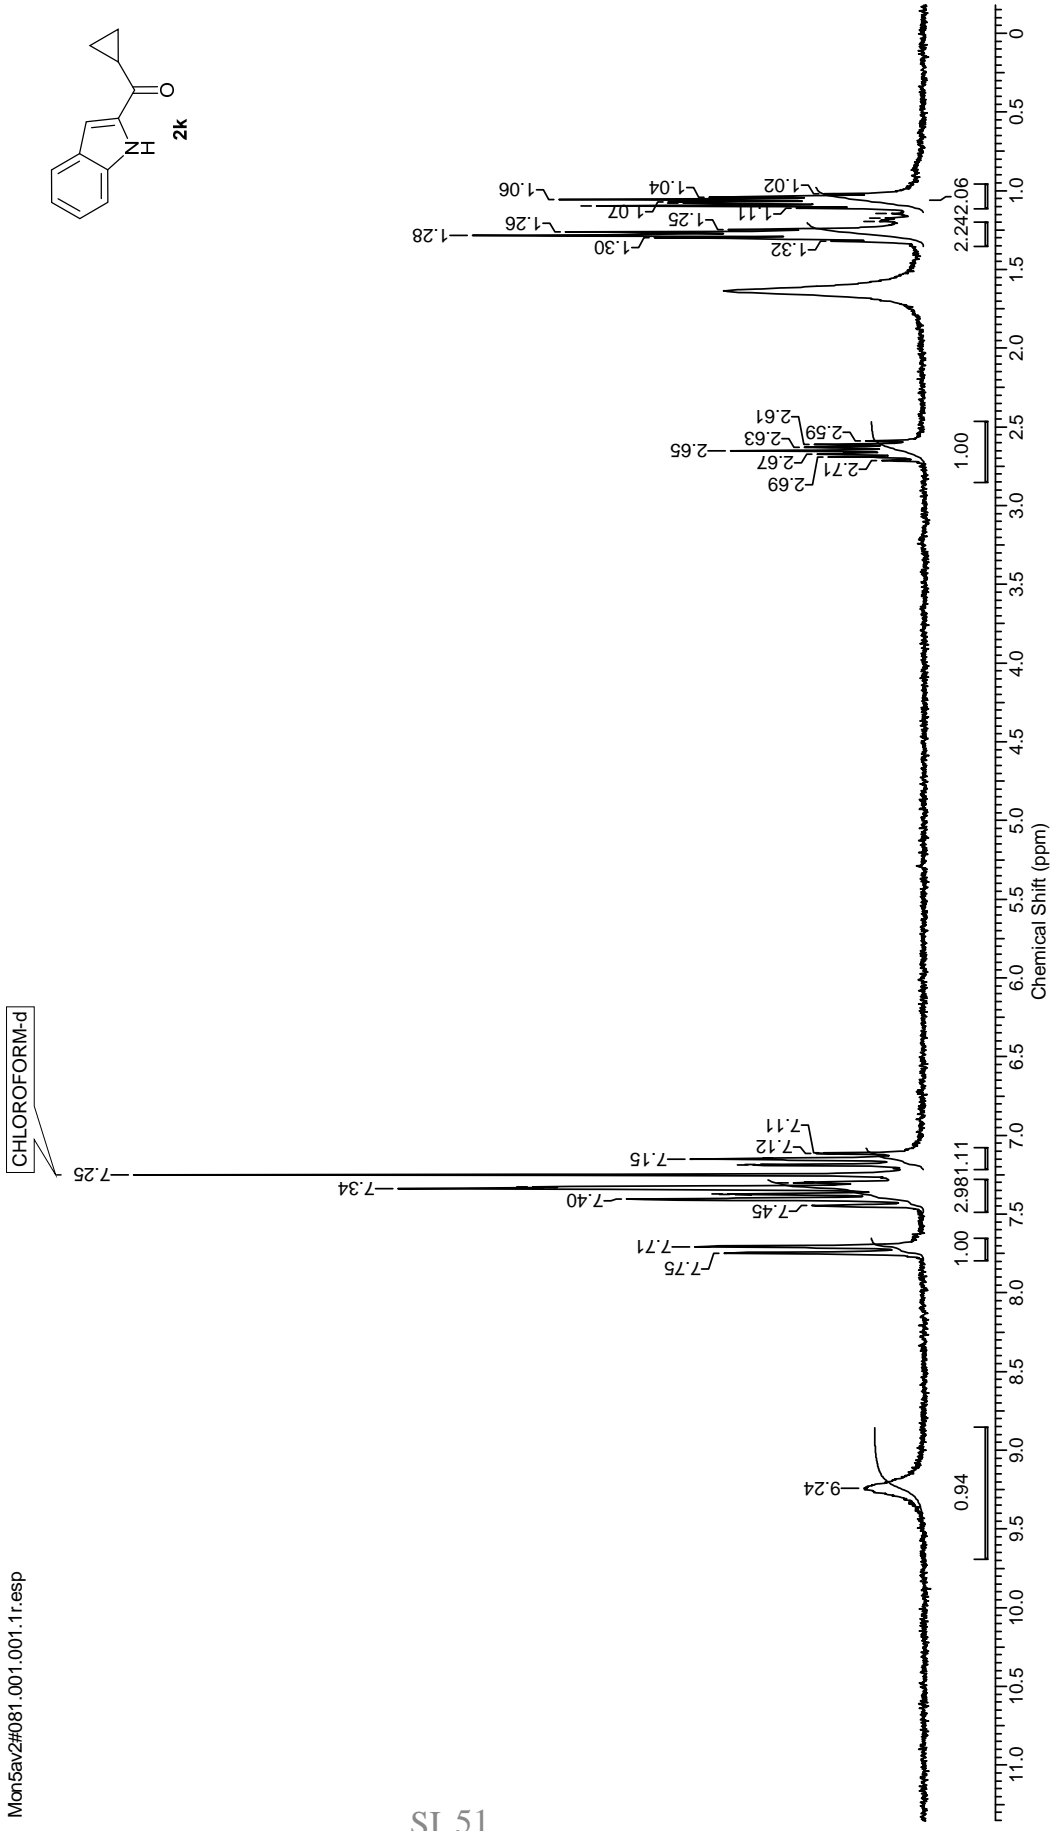

|                               |                                                 |                               |                      |                             |                         |
|-------------------------------|-------------------------------------------------|-------------------------------|----------------------|-----------------------------|-------------------------|
| <b>Acquisition Time (sec)</b> | 1.0486                                          | <b>Date</b>                   | 14 Aug 2013 20:46:24 | <b>Date Stamp</b>           | 14 Aug 2013<br>20:46:24 |
| <b>File Name</b>              | H:\New folder\Wed3av500#016_ym-962\3\PDATA\1\1r | <b>Frequency (MHz)</b>        | 125.76               | <b>Nucleus</b>              | 13C                     |
| <b>Origin</b>                 | spect                                           | <b>Owner</b>                  | nmr                  | <b>Points Count</b>         | 32768                   |
| <b>Receiver Gain</b>          | 575.00                                          | <b>Original Points Count</b>  | 32768                | <b>Pulse Sequence</b>       | zpgp30                  |
| <b>Spectrum Type</b>          | STANDARD                                        | <b>SW(cyclical) (Hz)</b>      | 31250.00             | <b>Spectrum Offset (Hz)</b> | 11980.2744              |
|                               |                                                 | <b>Sweep Width (Hz)</b>       | 31249.05             |                             |                         |
|                               |                                                 | <b>Solvent</b>                | CHLOROFORM-d         |                             |                         |
|                               |                                                 | <b>Temperature (degree C)</b> | 22.800               |                             |                         |

Wed3av500#016.003.001.1r.esp

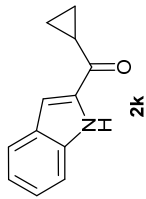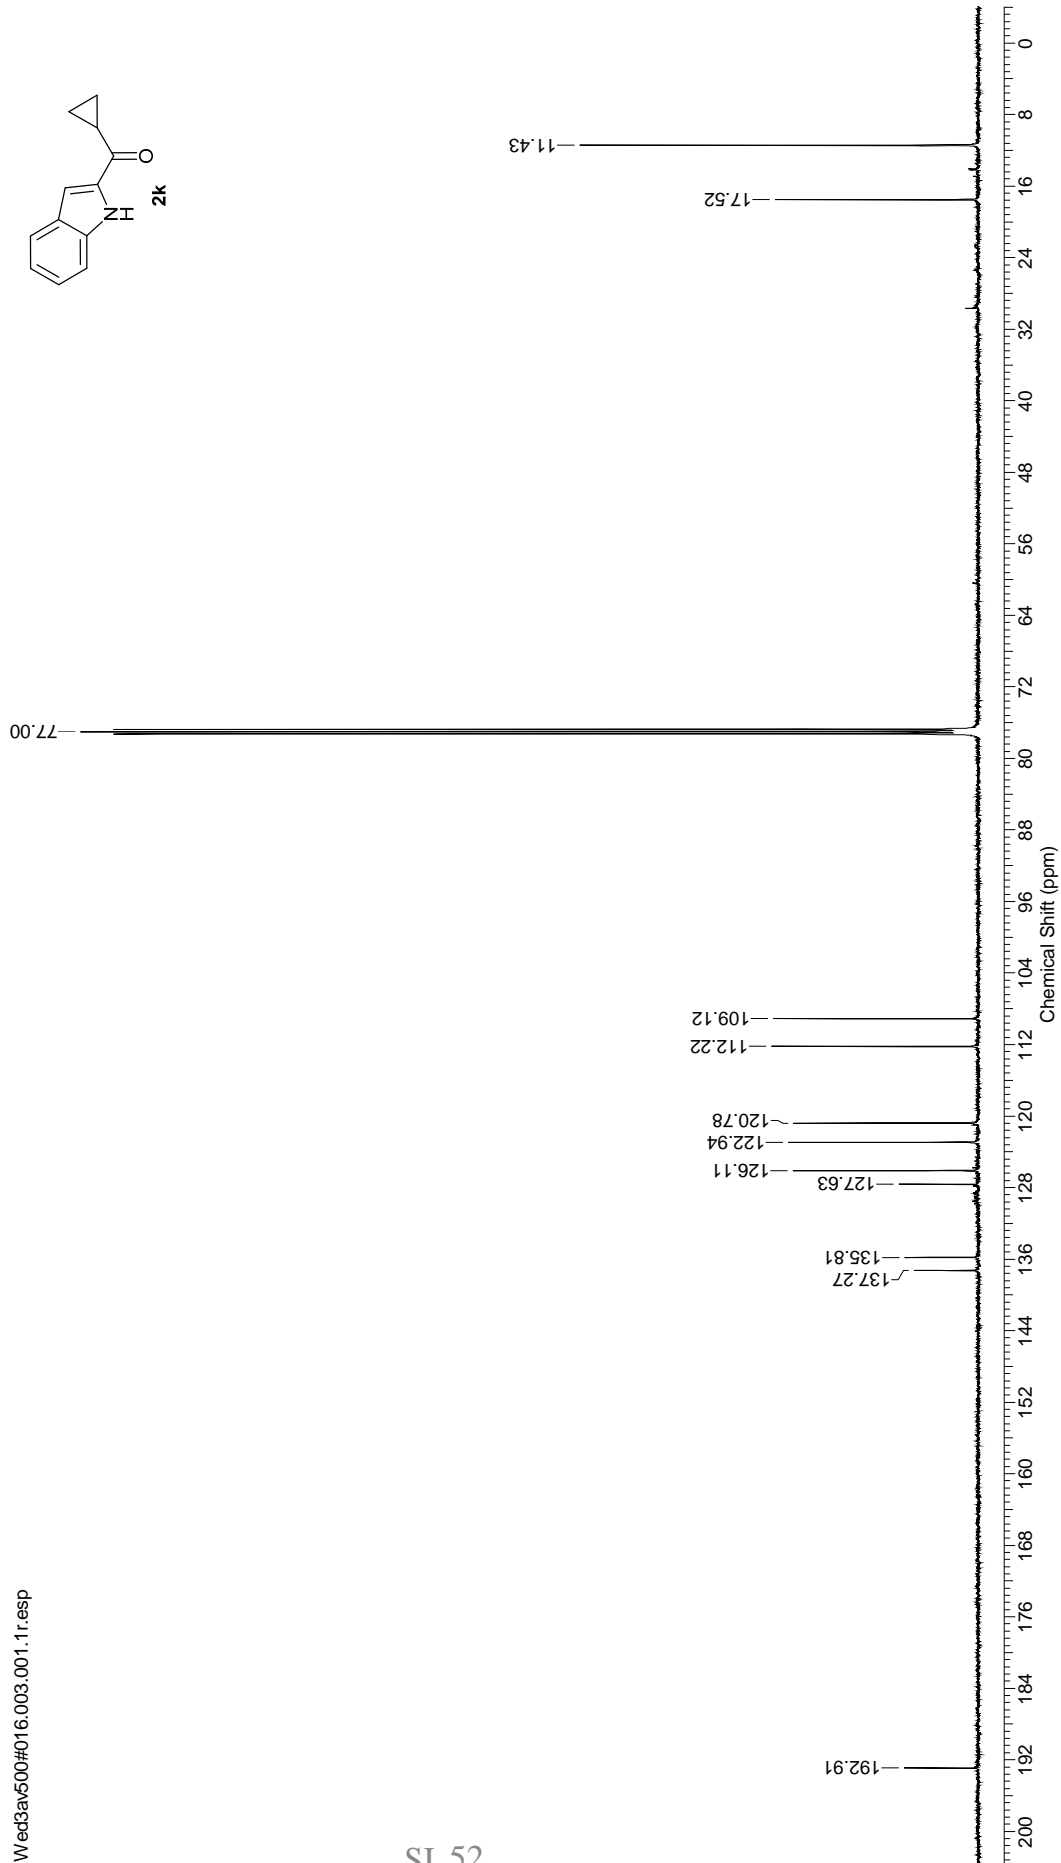

|                               |                                                 |                              |          |                               |                      |                             |                      |
|-------------------------------|-------------------------------------------------|------------------------------|----------|-------------------------------|----------------------|-----------------------------|----------------------|
| <b>Acquisition Time (sec)</b> | 1.1010                                          | <b>Comment</b>               | DEPT;    | <b>Date</b>                   | 14 Aug 2013 19:04:00 | <b>Date Stamp</b>           | 14 Aug 2013 19:04:00 |
| <b>File Name</b>              | H:\New folder\Wed3av500#016_ym-962\2\PDATA\1\1r | <b>Frequency (MHz)</b>       | 125.76   | <b>Nucleus</b>                | 13C                  | <b>Number of Transients</b> | 1200                 |
| <b>Origin</b>                 | spect                                           | <b>Owner</b>                 | nmr      | <b>Points Count</b>           | 32768                | <b>Pulse Sequence</b>       | dept135              |
| <b>Receiver Gain</b>          | 2050.00                                         | <b>Original Points Count</b> | 32768    | <b>Solvent</b>                | CHLOROFORM-d         | <b>Spectrum Offset (Hz)</b> | 12569.5156           |
| <b>Spectrum Type</b>          | DEPT135                                         | <b>SW(cyclical) (Hz)</b>     | 29761.90 | <b>Temperature (degree C)</b> | 22.400               |                             |                      |
|                               |                                                 | <b>Sweep Width (Hz)</b>      | 29761.00 |                               |                      |                             |                      |

Wed3av500#016.002.001.1r.esp

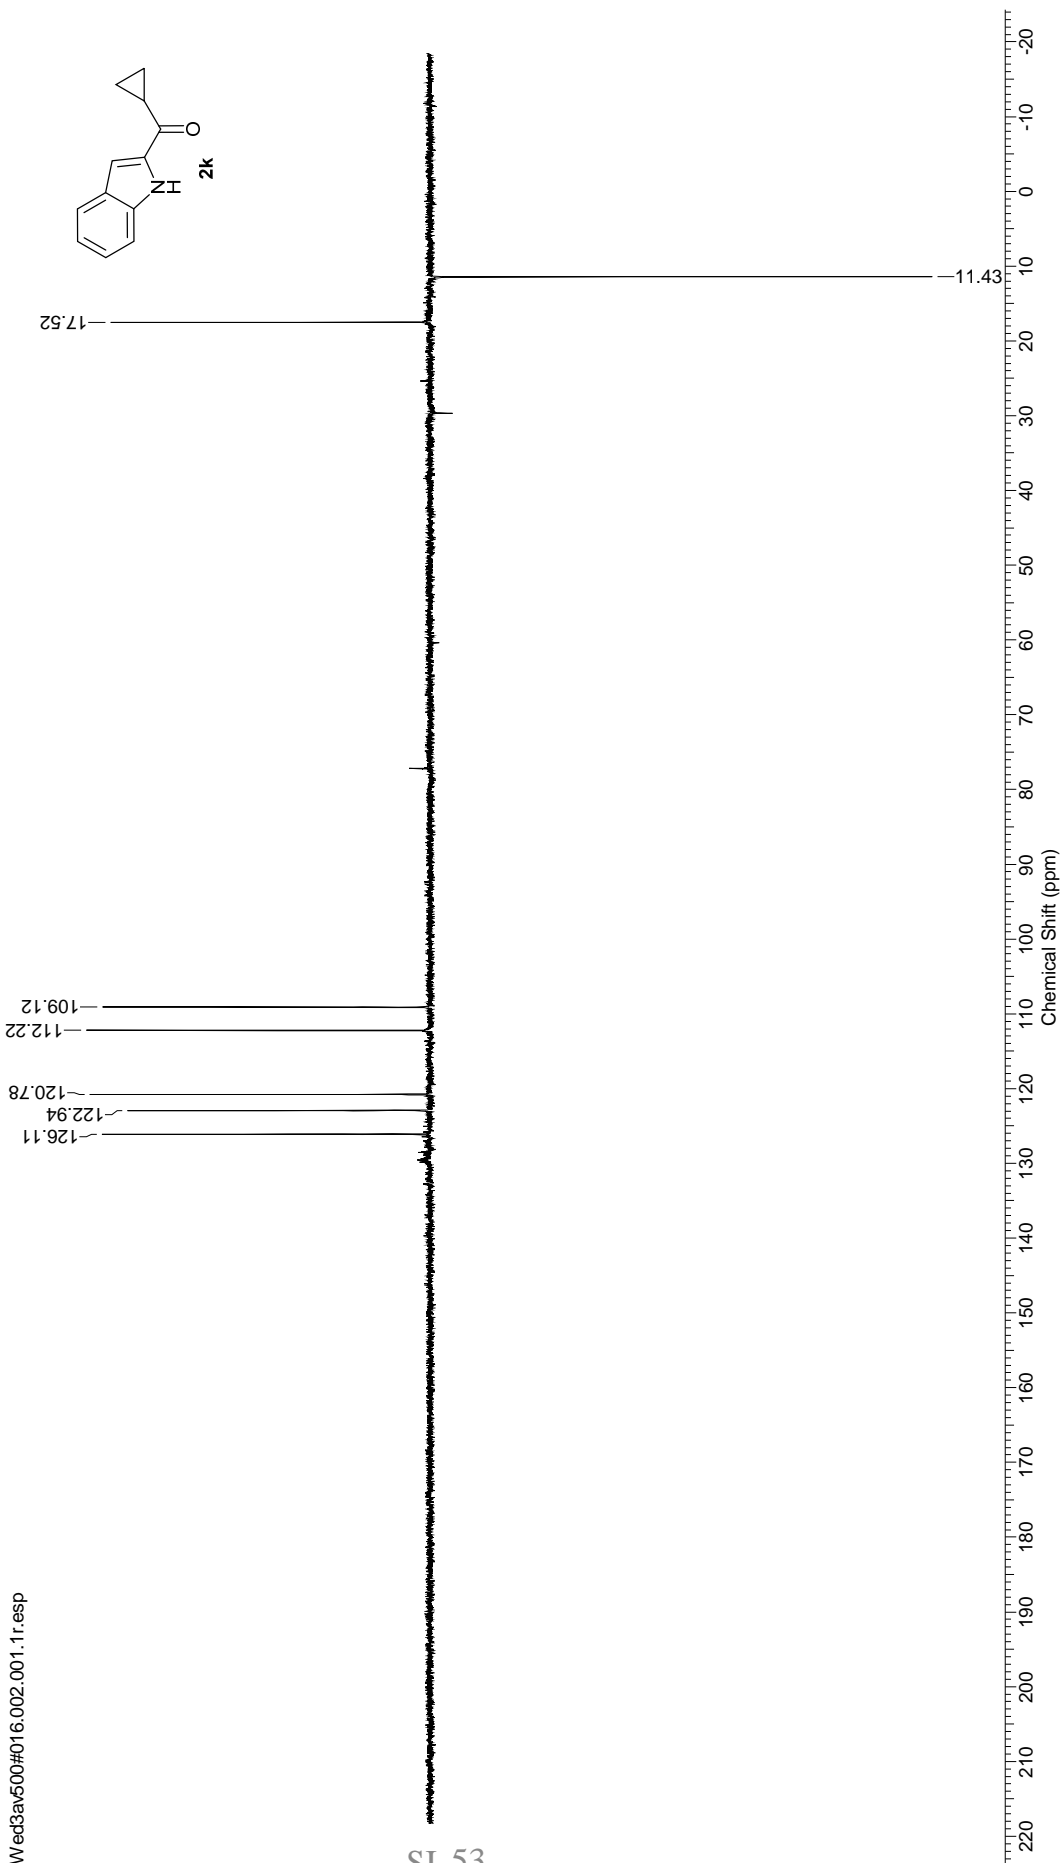

D:\Data\YM-962

9/16/2013 12:01:49 PM

YM-962 #950 RT: 4.23 AV: 1 NL: 1.76E9  
T: FTMS + p ESI Full ms [100.00-700.00]

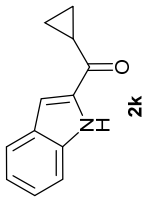

186.0916  
R=82207

C<sub>12</sub>H<sub>12</sub>O<sub>2</sub> N = 186.0913  
1.2222 ppm

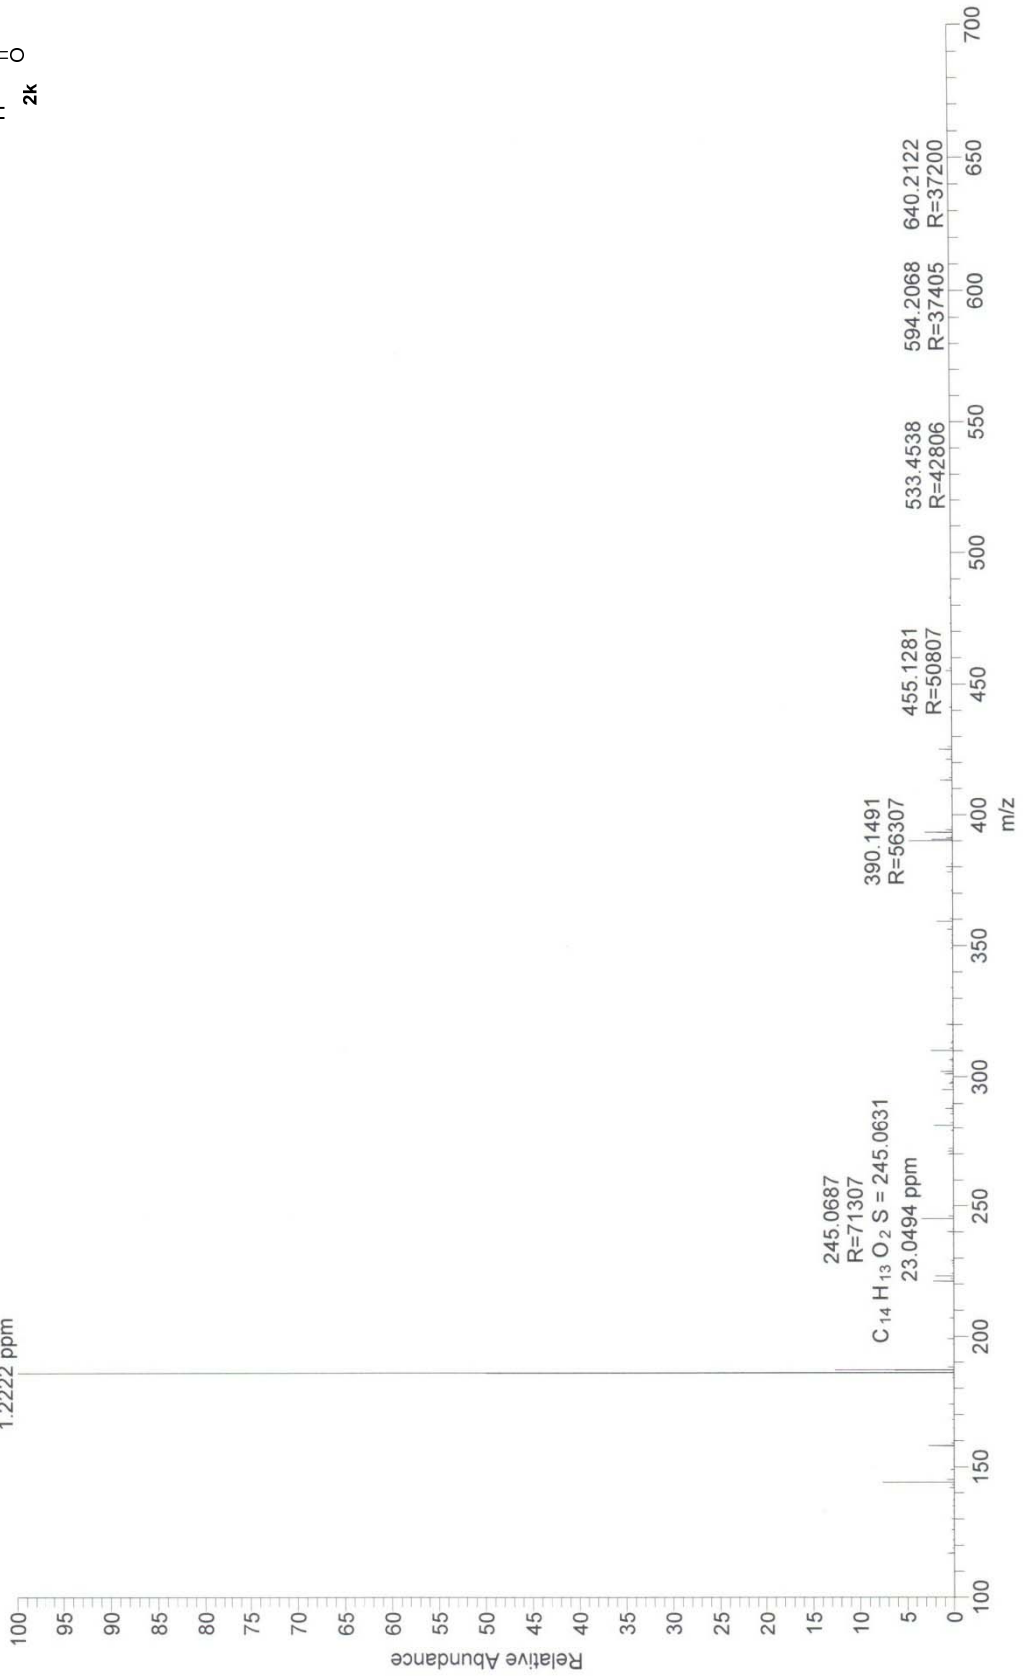

|                        |                                              |                      |           |                  |                     |                        |       |
|------------------------|----------------------------------------------|----------------------|-----------|------------------|---------------------|------------------------|-------|
| Acquisition Time (sec) | 7.9167                                       | Comment              | yogesh    | Date             | 25/06/2013 15:30:18 | Original Points Count  | 32768 |
| File Name              | F:\yogesh\Indole metho\NMR\ym-942\HNMR B.ESP | Frequency (MHz)      | 200.13    | Nucleus          | 1H                  |                        |       |
| Points Count           | 32768                                        | Spectrum Offset (Hz) | 1225.4011 | Sweep Width (Hz) | 4139.07             | Temperature (degree C) | 0.000 |

HNMR B.ESP

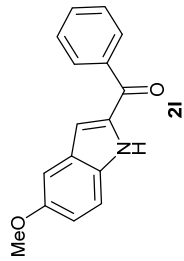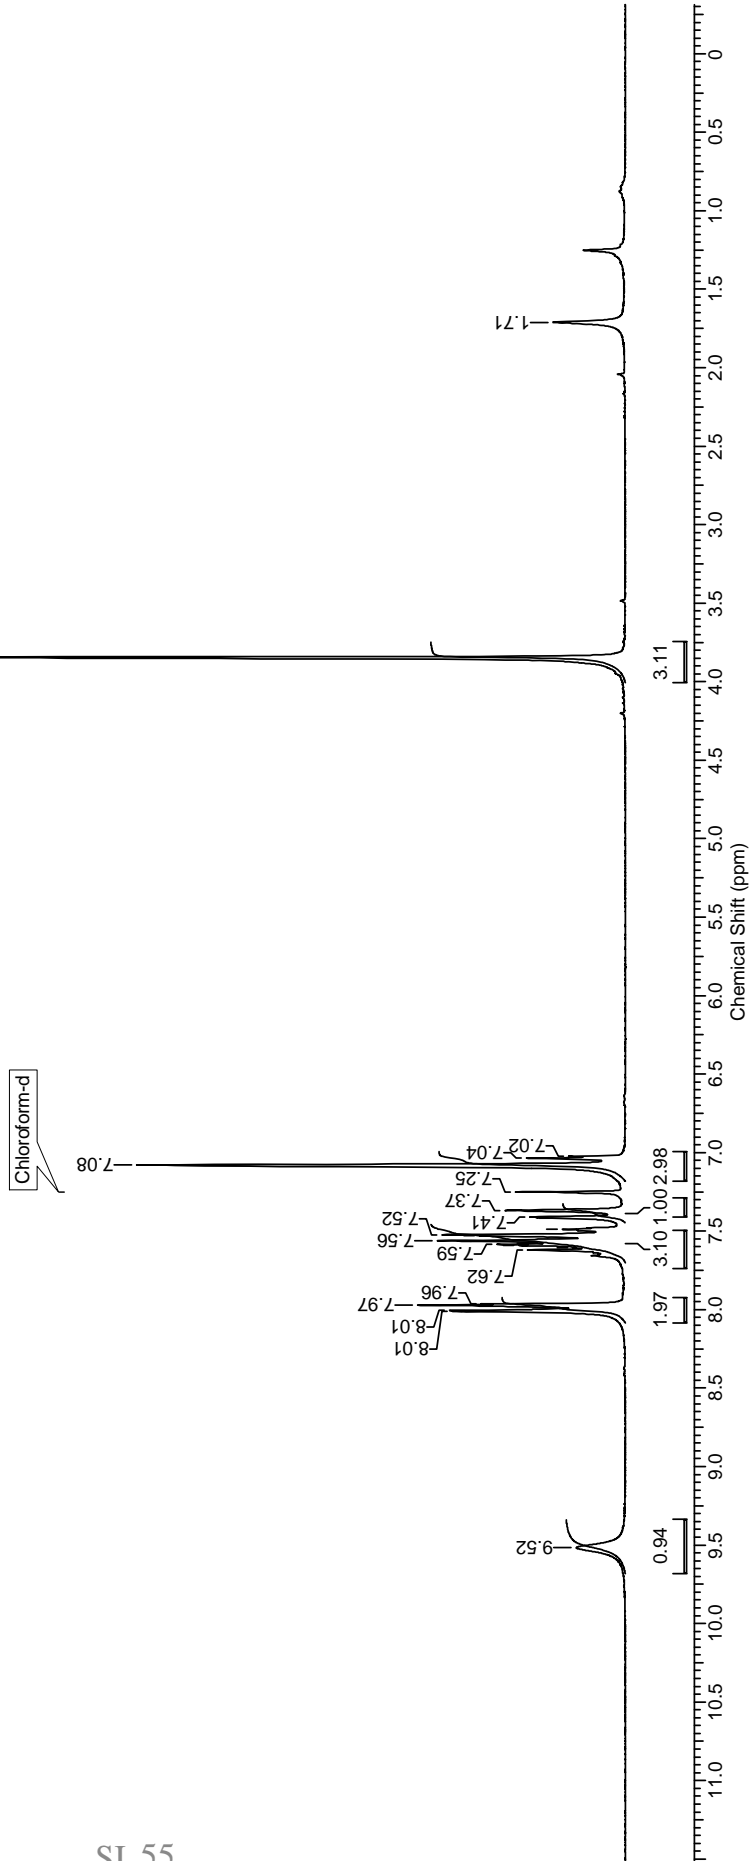

|                               |                      |                         |                                                                                |                               |                      |
|-------------------------------|----------------------|-------------------------|--------------------------------------------------------------------------------|-------------------------------|----------------------|
| <b>Acquisition Time (sec)</b> | 1.0434               | <b>Comment</b>          | yogesh                                                                         | <b>Date</b>                   | 19 Sep 2013 07:56:04 |
| <b>Date Stamp</b>             | 19 Sep 2013 07:28:11 | <b>File Name</b>        | \\lagn\mnr_data\JEOL_400\2013\2013 Sep 2013 LiquidW ed3ECX400#027_CARBON-3.jdf |                               |                      |
| <b>Frequency (MHz)</b>        | 100.53               | <b>Nucleus</b>          | 13C                                                                            | <b>Origin</b>                 | ECX 400              |
| <b>Original Points Count</b>  | 26214                | <b>Owner</b>            | delta                                                                          | <b>Pulse Sequence</b>         | single_pulse_dec     |
| <b>Receiver Gain</b>          | 60.00                | <b>Solvent</b>          | CHLOROFORM-d                                                                   | <b>Spectrum Offset (Hz)</b>   | 10036.4561           |
| <b>Spectrum Type</b>          | STANDARD             | <b>Sweep Width (Hz)</b> | 25124.29                                                                       | <b>Temperature (degree C)</b> | 22.500               |

Wed3ECX400#027\_CARBON-3.esp

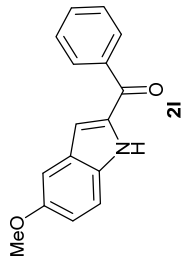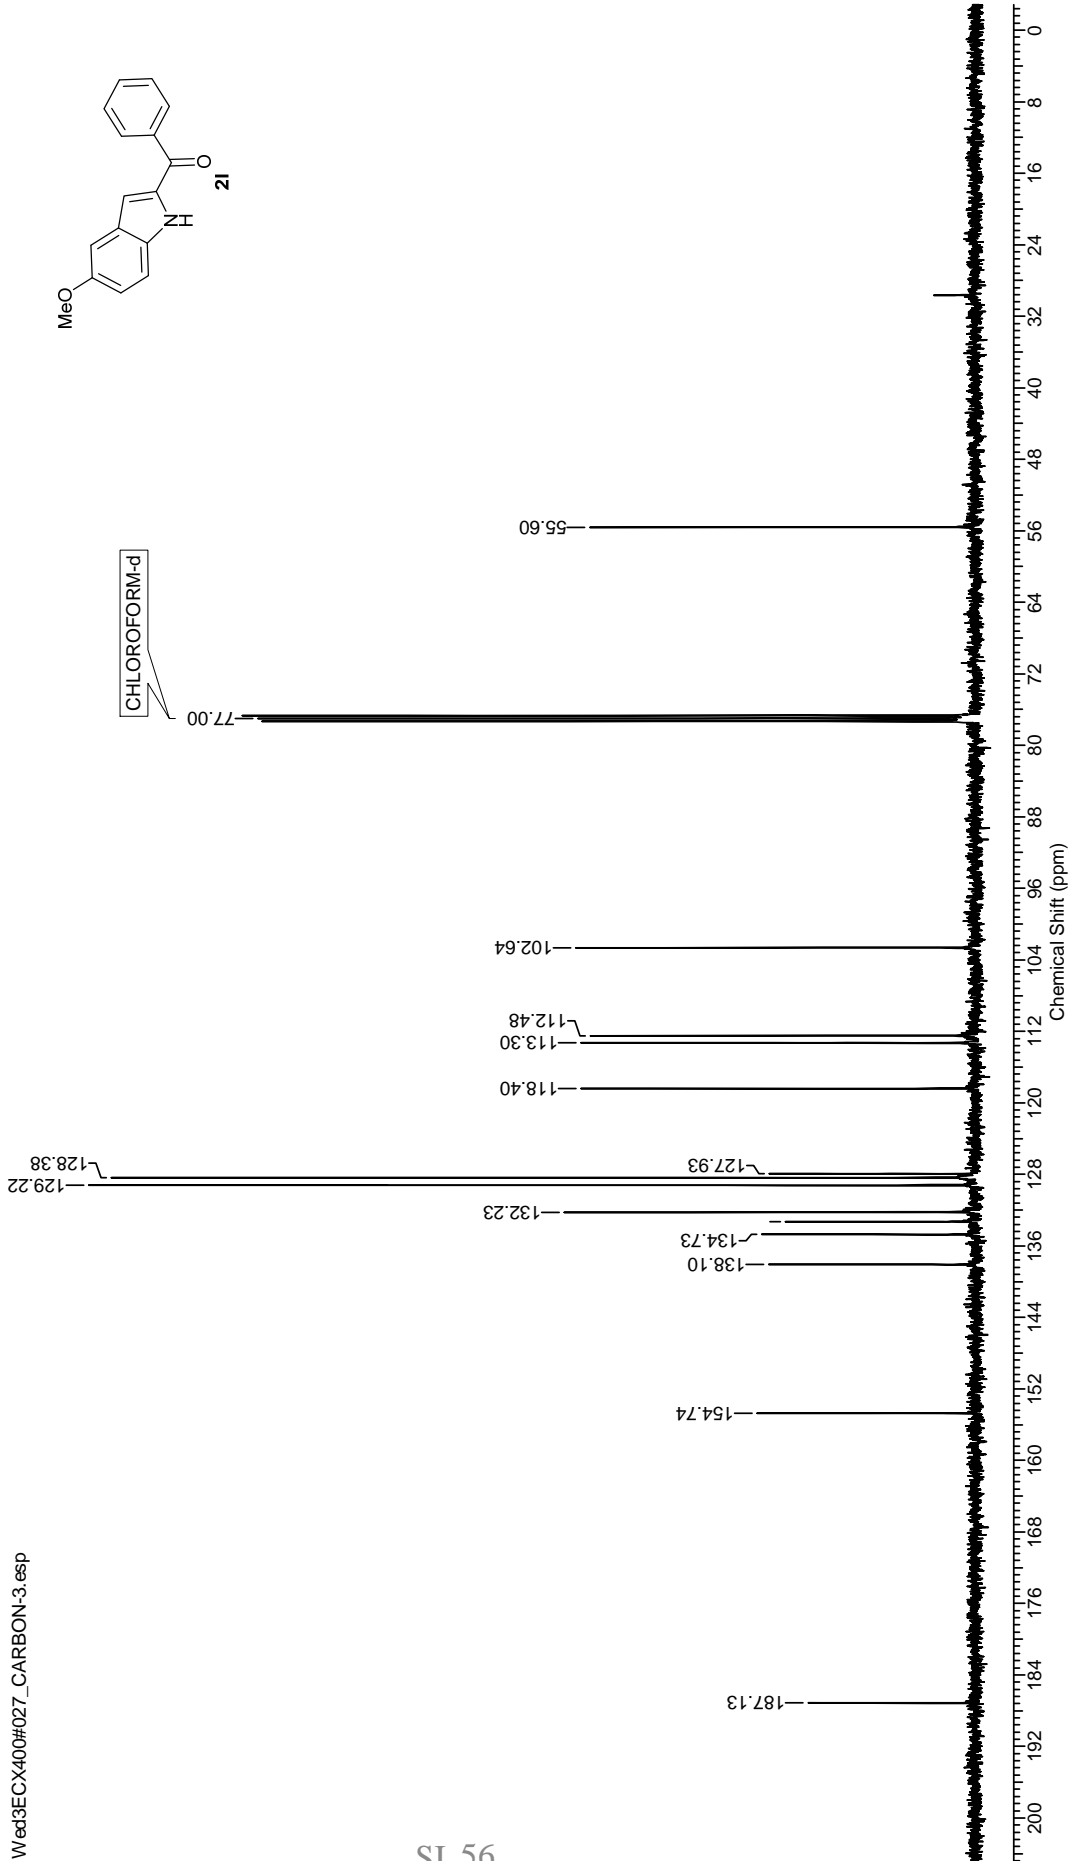



|                               |                      |                         |              |                               |                                                                           |
|-------------------------------|----------------------|-------------------------|--------------|-------------------------------|---------------------------------------------------------------------------|
| <b>Acquisition Time (sec)</b> | 1.0434               | <b>Comment</b>          | yogesh       | <b>Date</b>                   | 19 Sep 2013 07:56:04                                                      |
| <b>Date Stamp</b>             | 19 Sep 2013 07:30:24 | <b>Nucleus</b>          | 13C          | <b>File Name</b>              | \\agn\nmr_data\JEOL_400\2013\Sep 2013\LiquidW\ed3ECX400#027_DEPT135-3.jdf |
| <b>Frequency (MHz)</b>        | 100.53               | <b>Owner</b>            | delta        | <b>Number of Transients</b>   | 47                                                                        |
| <b>Original Points Count</b>  | 26214                | <b>Solvent</b>          | CHLOROFORM-d | <b>Points Count</b>           | 26214                                                                     |
| <b>Receiver Gain</b>          | 60.00                | <b>Sweep Width (Hz)</b> | 25124.29     | <b>Origin</b>                 | ECX 400                                                                   |
| <b>Spectrum Type</b>          | DEPT135              |                         |              | <b>Pulse Sequence</b>         | dept.ex2 (selection_angle=135)                                            |
|                               |                      |                         |              | <b>Spectrum Offset (Hz)</b>   | 10036.0127                                                                |
|                               |                      |                         |              | <b>Temperature (degree C)</b> | 22.600                                                                    |

Wed3ECX400#027\_DEPT135-3.esp

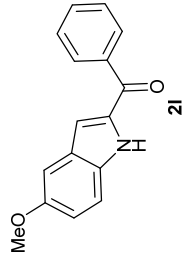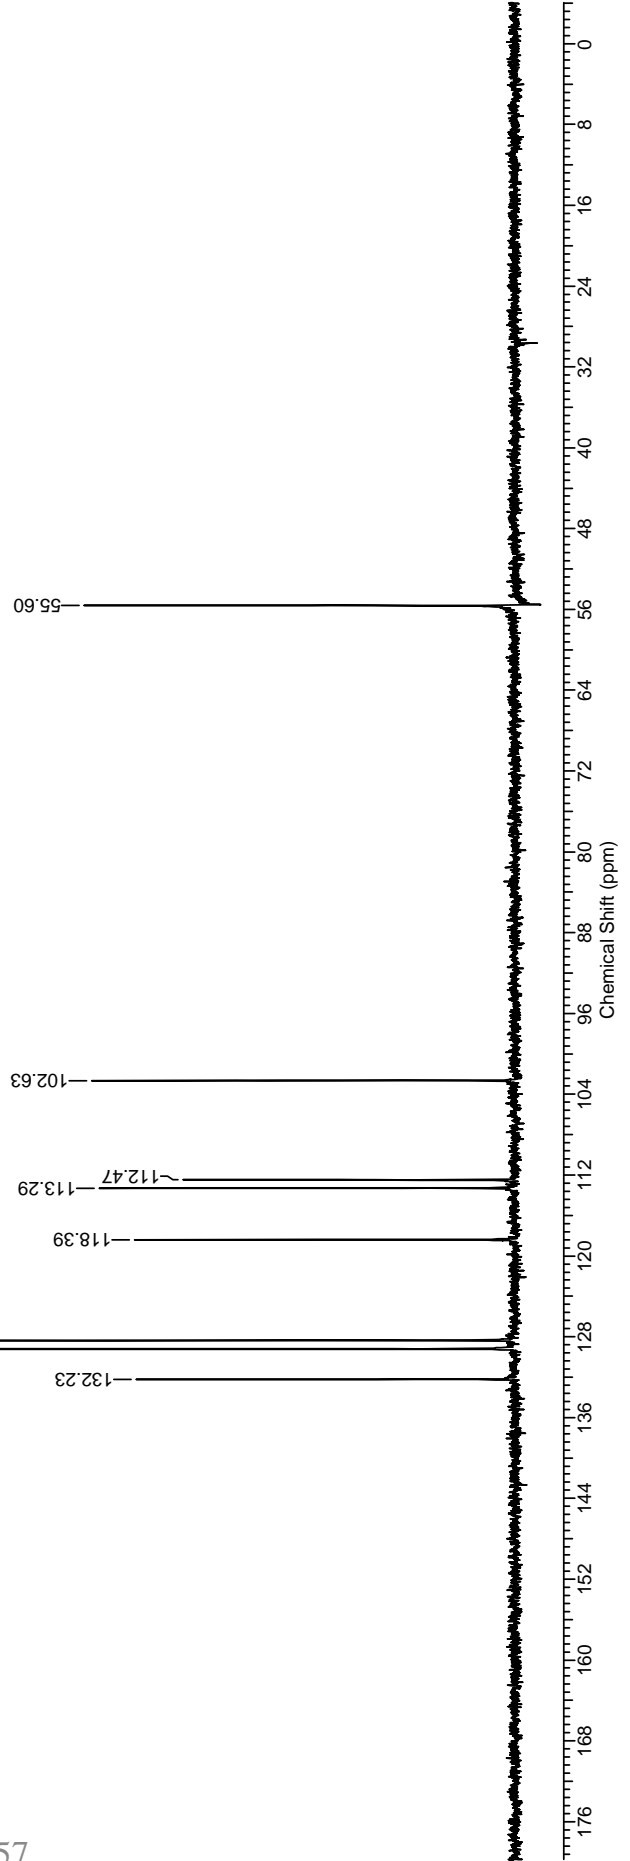

|                               |                      |                     |              |                              |                                                             |
|-------------------------------|----------------------|---------------------|--------------|------------------------------|-------------------------------------------------------------|
| <b>Acquisition Time (sec)</b> | 2.0447               | <b>Comment</b>      | Yogesh 1H    | <b>Date</b>                  | 19 Sep 2013 17:29:44                                        |
| <b>Date Stamp</b>             | 19 Sep 2013 17:29:44 | <b>Nucleus</b>      | 1H           | <b>File Name</b>             | \\lagm\nmr_data\AV400\Sep_13_400\Thu3av400#003\1\PDATA\1\1r |
| <b>Frequency (MHz)</b>        | 400.13               | <b>Points Count</b> | 32768        | <b>Number of Transients</b>  | 64                                                          |
| <b>Owner</b>                  | Administrator        | <b>Solvent</b>      | CHLOROFORM-d | <b>Pulse Sequence</b>        | zg30                                                        |
| <b>Temperature (degree C)</b> | 25.100               |                     |              | <b>Spectrum Offset (Hz)</b>  | 2257.9458                                                   |
|                               |                      |                     |              | <b>Spectrum Type</b>         | STANDARD                                                    |
|                               |                      |                     |              | <b>Receiver Gain</b>         | 724.00                                                      |
|                               |                      |                     |              | <b>Original Points Count</b> | 16384                                                       |
|                               |                      |                     |              | <b>SW(cyclical) (Hz)</b>     | 8012.82                                                     |
|                               |                      |                     |              | <b>Sweep Width (Hz)</b>      | 8012.58                                                     |

Thu3av400#003.001.001.1r.esp

CHLOROFORM-d

CHLOROFORM-d

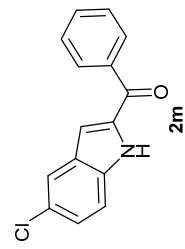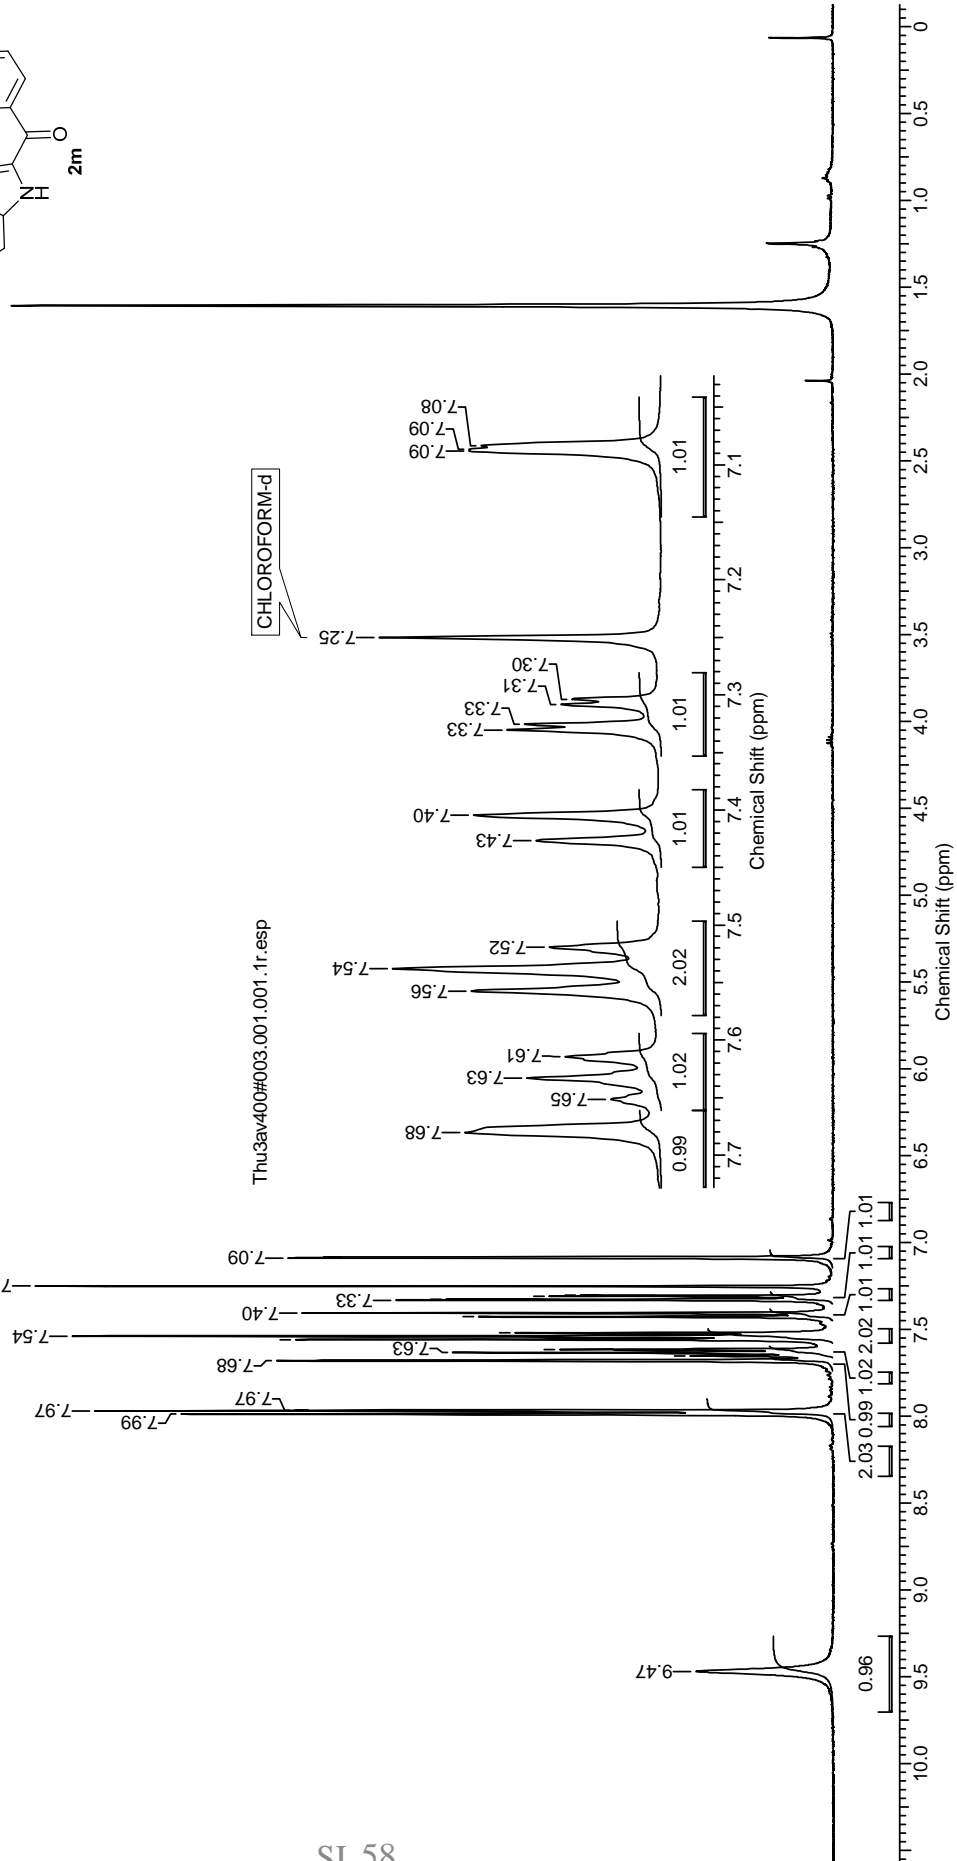

|                               |                      |                     |       |                              |                                                             |
|-------------------------------|----------------------|---------------------|-------|------------------------------|-------------------------------------------------------------|
| <b>Acquisition Time (sec)</b> | 0.6488               | <b>Comment</b>      | 13C   | <b>Date</b>                  | 19 Sep 2013 19:48:24                                        |
| <b>Date Stamp</b>             | 19 Sep 2013 19:48:24 | <b>Nucleus</b>      | 13C   | <b>File Name</b>             | \\agn\nmr_data\AV400\Sep_13_400\Thu3av400#003\3\PD\DATA1\1r |
| <b>Frequency (MHz)</b>        | 100.61               | <b>Points Count</b> | 32768 | <b>Number of Transients</b>  | 2063                                                        |
| <b>Owner</b>                  | root                 |                     |       | <b>Pulse Sequence</b>        | zpg30                                                       |
| <b>Solvent</b>                | CHLOROFORM-d         |                     |       | <b>Receiver Gain</b>         | 2050.00                                                     |
| <b>Temperature (degree C)</b> | 24.800               |                     |       | <b>Spectrum Type</b>         | STANDARD                                                    |
|                               |                      |                     |       | <b>Spectrum Offset (Hz)</b>  | 9634.8799                                                   |
|                               |                      |                     |       | <b>Original Points Count</b> | 16384                                                       |
|                               |                      |                     |       | <b>SW(cyclical) (Hz)</b>     | 25252.53                                                    |
|                               |                      |                     |       | <b>Sweep Width (Hz)</b>      | 25251.75                                                    |

Thu3av400#003.003.001.1r.esp

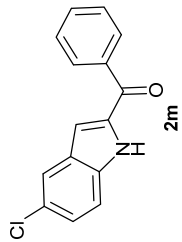

CHLOROFORM-d

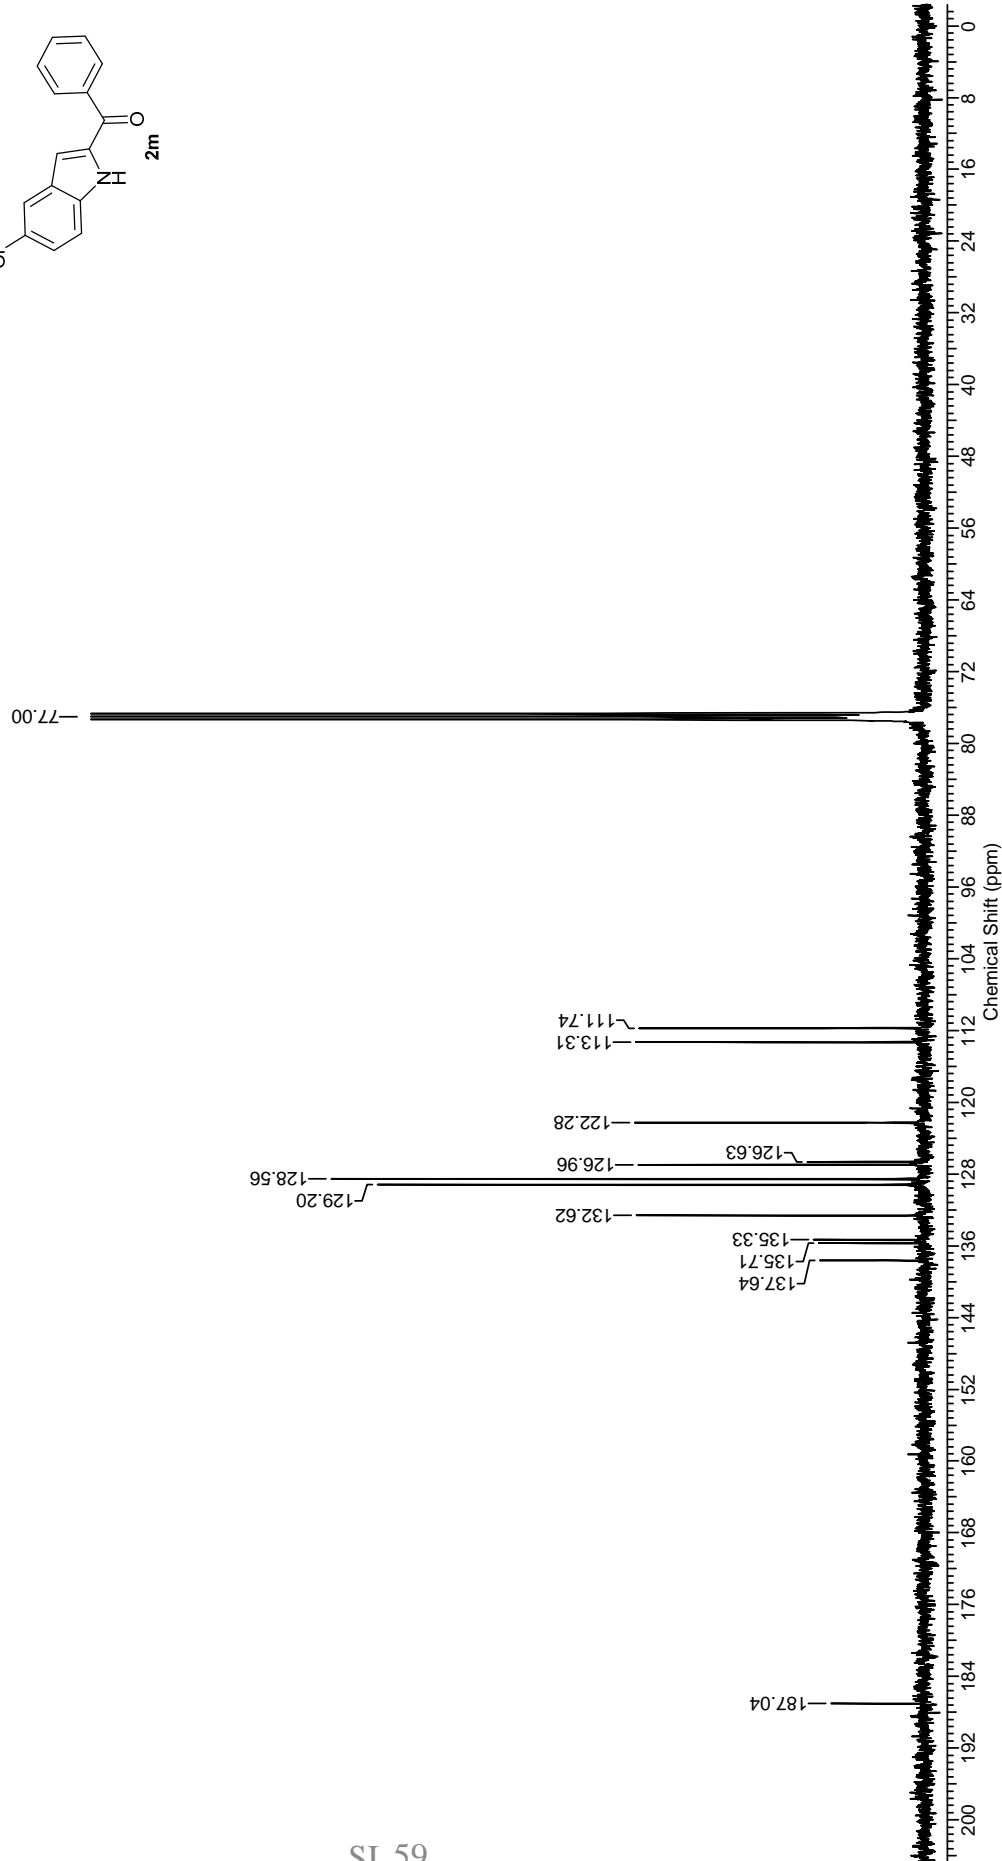

|                               |                      |                              |                 |                             |                                                            |
|-------------------------------|----------------------|------------------------------|-----------------|-----------------------------|------------------------------------------------------------|
| <b>Acquisition Time (sec)</b> | 0.6488               | <b>Comment</b>               | DEPT            | <b>Date</b>                 | 19 Sep 2013 18:16:40                                       |
| <b>Date Stamp</b>             | 19 Sep 2013 18:16:40 | <b>Nucleus</b>               | <sup>13</sup> C | <b>File Name</b>            | \\agninmr_data\AV400\Sep_13_400\Thu3av400#003\2PPDATA\111r |
| <b>Frequency (MHz)</b>        | 100.61               | <b>Points Count</b>          | 32768           | <b>Number of Transients</b> | 1000                                                       |
| <b>Owner</b>                  | root                 | <b>Points Count</b>          | 32768           | <b>Pulse Sequence</b>       | dept135                                                    |
| <b>Solvent</b>                | CHLOROFORM-d         | <b>Points Count</b>          | 32768           | <b>Receiver Gain</b>        | 16384.00                                                   |
| <b>Temperature (degree C)</b> | 24.700               | <b>Points Count</b>          | 32768           | <b>Spectrum Type</b>        | DEPT135                                                    |
|                               |                      | <b>Original Points Count</b> | 16384           | <b>SW(cyclical) (Hz)</b>    | 25252.53                                                   |
|                               |                      | <b>Sweep Width (Hz)</b>      | 25251.75        |                             |                                                            |

Thu3av400#003.002.001.1r.esp

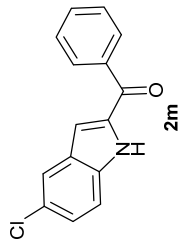

SI 60

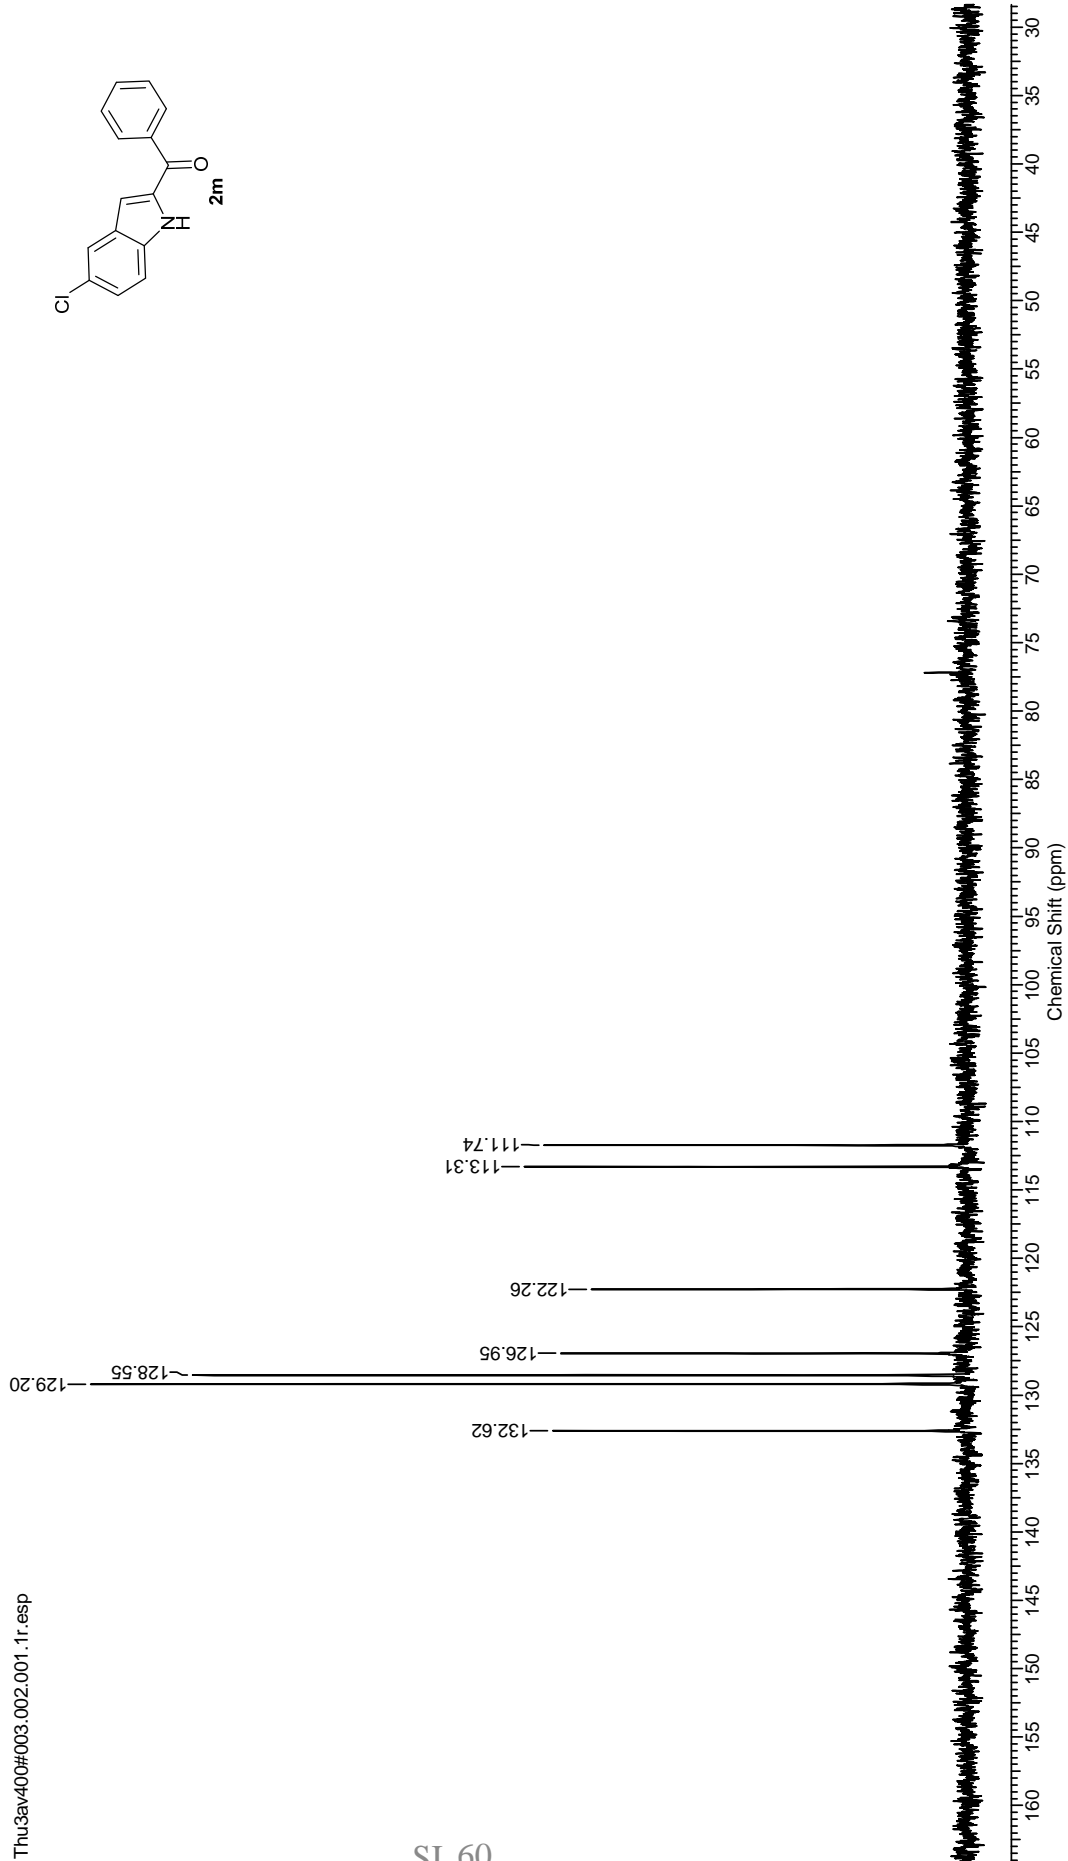

D:\Data\YM-997

12/24/2013 3:54:41 PM

YM-997 #1166 RT: 5.20 AV: 1 NL: 1.09E8  
T: FTMS + p ESI Full ms [100.00-700.00]

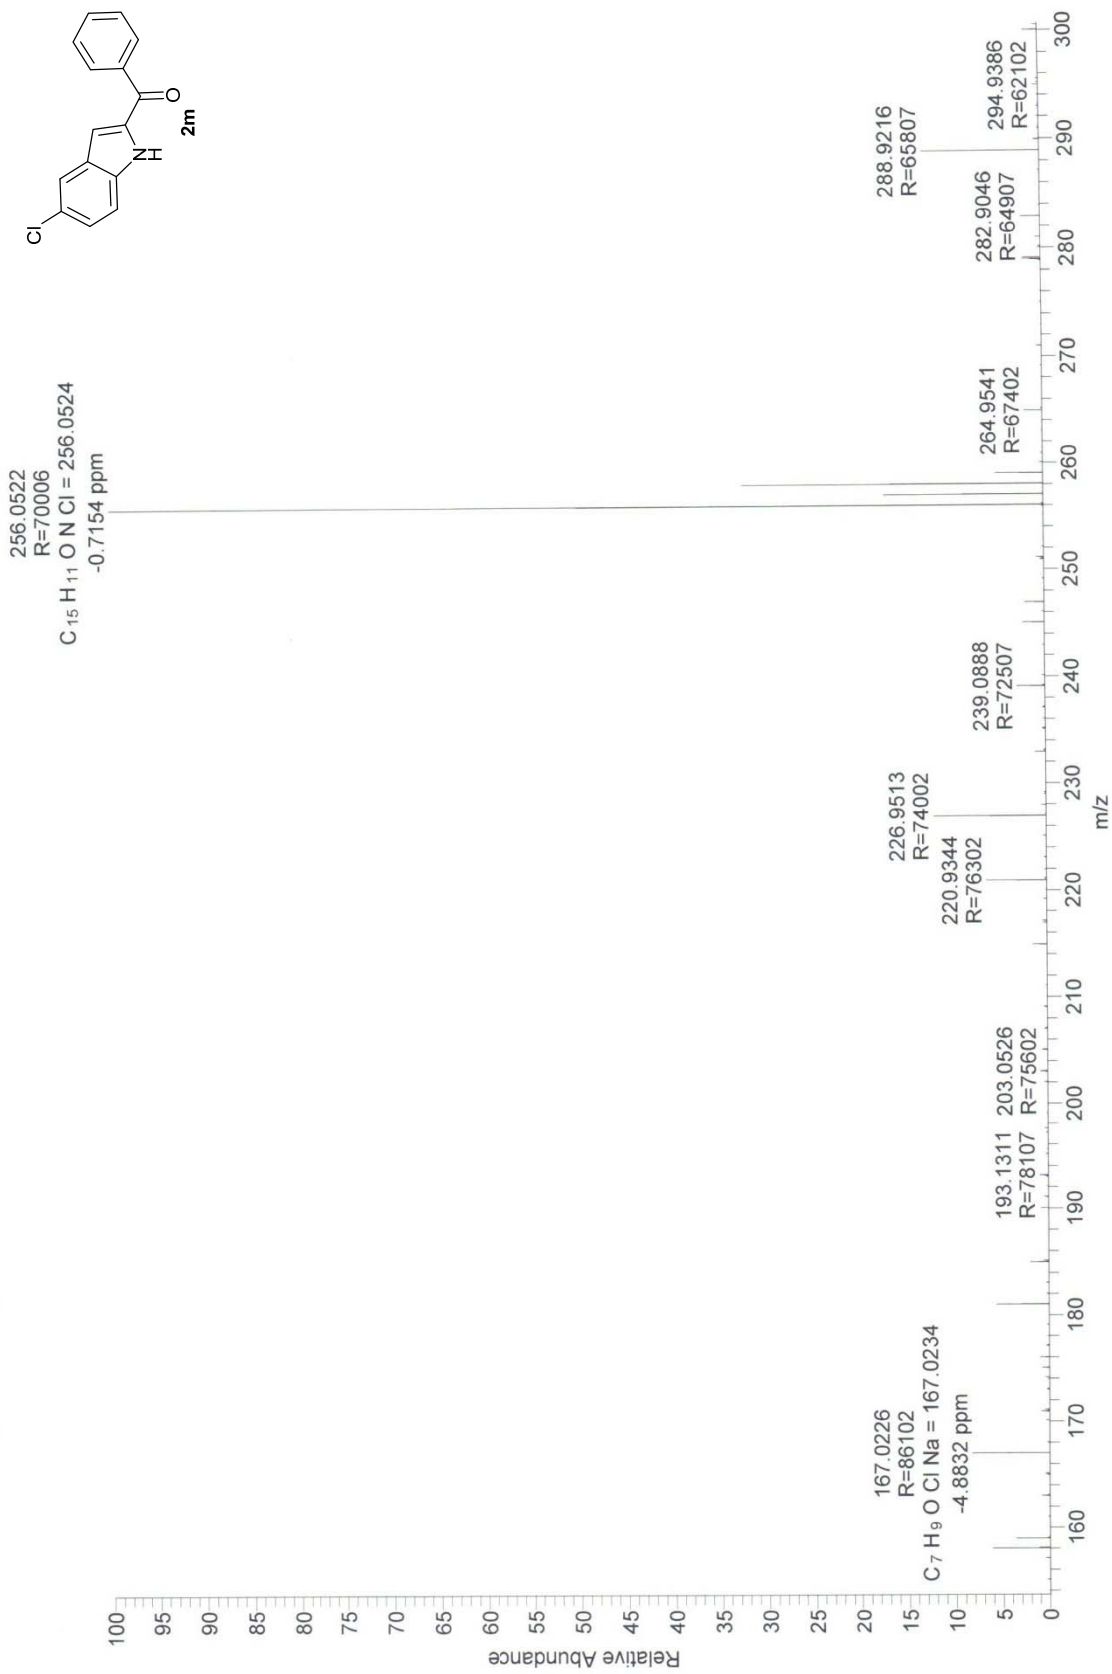

|                        |                      |                   |                                                                                 |                        |                      |
|------------------------|----------------------|-------------------|---------------------------------------------------------------------------------|------------------------|----------------------|
| Acquisition Time (sec) | 3.9584               | Comment           | yogesh                                                                          | Date                   | 07 Aug 2013 15:26:00 |
| Date Stamp             | 07 Aug 2013 15:26:00 | File Name         | \lagm\nmr_data\AV200\AUG_13\AV200\data\Administrator\hmr\Wed2av#032\1\PDATA111r |                        |                      |
| Frequency (MHz)        | 200.13               | Nucleus           | 1H                                                                              | Origin                 | av200                |
| Original Points Count  | 16384                | Owner             | Administrator                                                                   | Points Count           | 32768                |
| Receiver Gain          | 1149.40              | SW(cyclical) (Hz) | 4139.07                                                                         | Pulse Sequence         | zg30                 |
| Spectrum Offset (Hz)   | 1225.6606            | Spectrum Type     | STANDARD                                                                        | Solvent                | CHLOROFORM-d         |
|                        |                      |                   |                                                                                 | Sweep Width (Hz)       | 4138.95              |
|                        |                      |                   |                                                                                 | Temperature (degree C) | 27.000               |

Wed2av#032.001.001.1r.esp

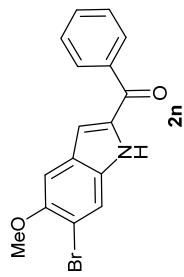

Wed2av#032.001.001.1r.esp

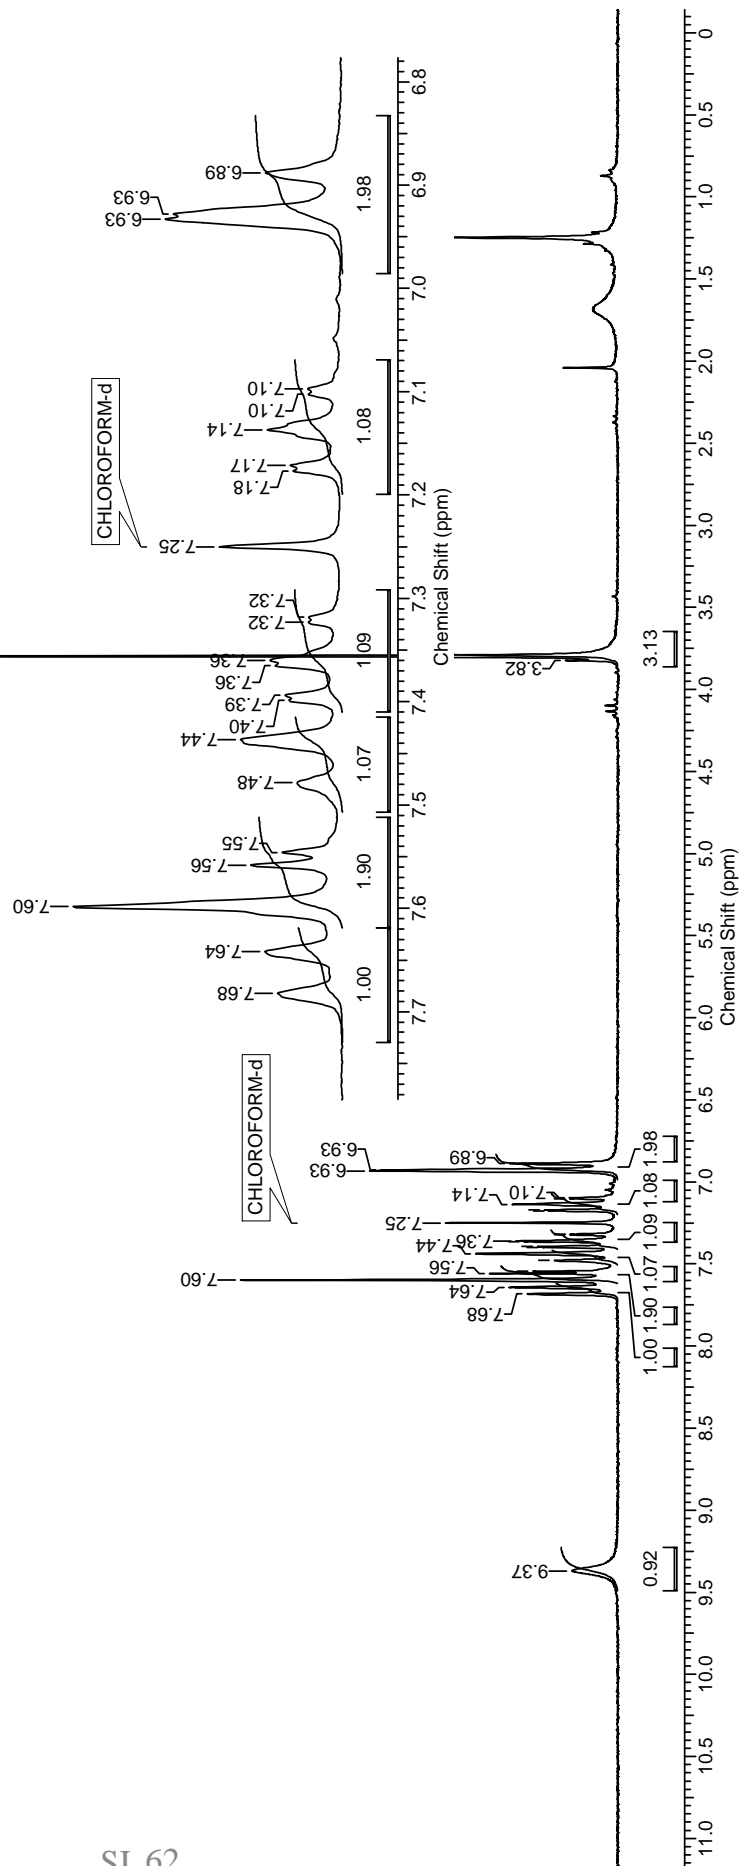

|                               |                                                 |                              |          |                               |                      |                             |                      |
|-------------------------------|-------------------------------------------------|------------------------------|----------|-------------------------------|----------------------|-----------------------------|----------------------|
| <b>Acquisition Time (sec)</b> | 1.0486                                          | <b>Comment</b>               | 13C      | <b>Date</b>                   | 14 Aug 2013 10:49:04 | <b>Date Stamp</b>           | 14 Aug 2013 10:49:04 |
| <b>File Name</b>              | H:\New folder\Wed3av500#001_ym-967\3\PDATA\1\1r | <b>Frequency (MHz)</b>       | 125.76   | <b>Nucleus</b>                | 13C                  | <b>Number of Transients</b> | 635                  |
| <b>Origin</b>                 | spect                                           | <b>Original Points Count</b> | 32768    | <b>Owner</b>                  | nitr                 | <b>Pulse Sequence</b>       | zpgg30               |
| <b>Receiver Gain</b>          | 575.00                                          | <b>SW(cyclical) (Hz)</b>     | 31250.00 | <b>Solvent</b>                | CHLOROFORM-d         | <b>Spectrum Offset (Hz)</b> | 11979.3203           |
| <b>Spectrum Type</b>          | STANDARD                                        | <b>Sweep Width (Hz)</b>      | 31249.05 | <b>Temperature (degree C)</b> | 22.500               |                             |                      |

Wed3av500#001.003.001.1r.esp

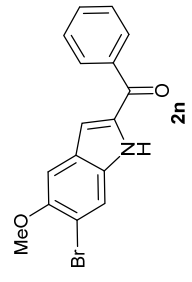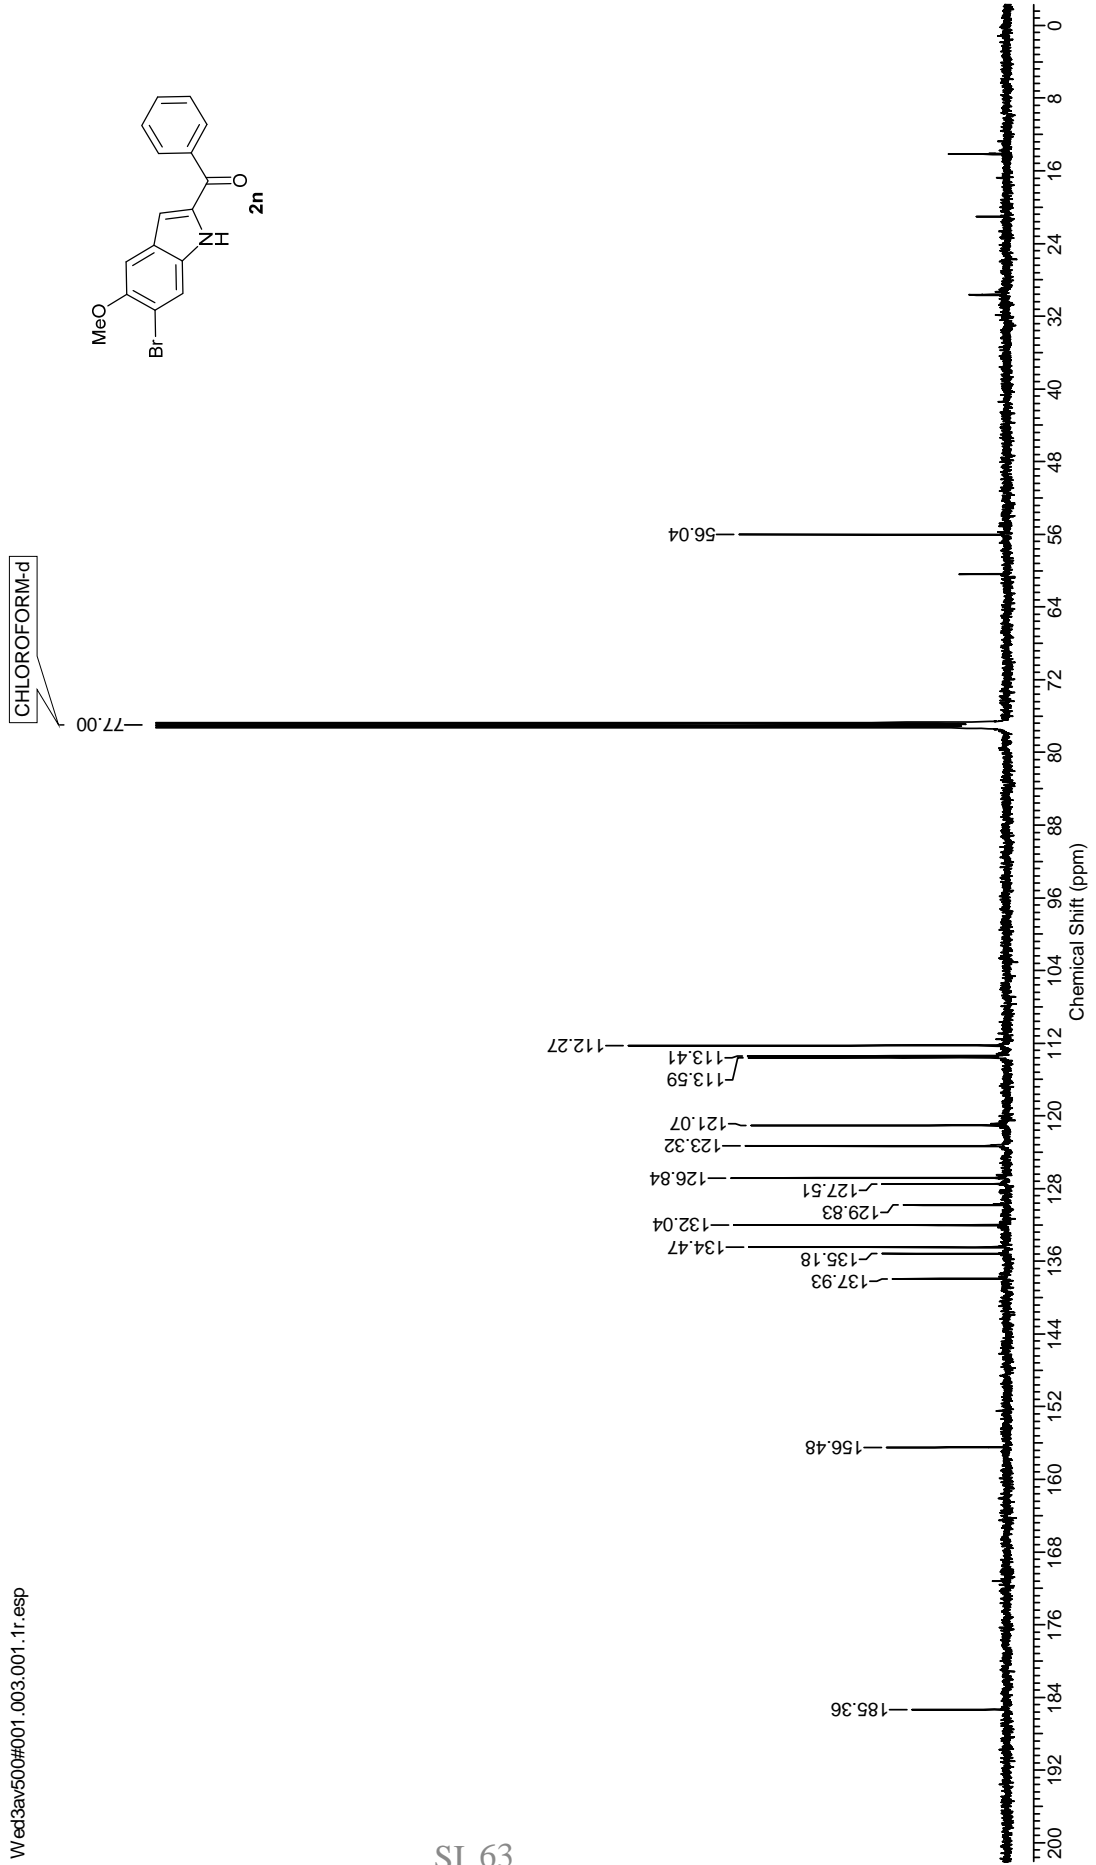

|                               |                                                |                              |          |                               |                      |                             |                      |
|-------------------------------|------------------------------------------------|------------------------------|----------|-------------------------------|----------------------|-----------------------------|----------------------|
| <b>Acquisition Time (sec)</b> | 1.1010                                         | <b>Comment</b>               | DEPT;    | <b>Date</b>                   | 14 Aug 2013 10:27:44 | <b>Date Stamp</b>           | 14 Aug 2013 10:27:44 |
| <b>File Name</b>              | H:\New folder\Wed3av500#001_ym-9672\pdata\111r | <b>Frequency (MHz)</b>       | 13C      | <b>Nucleus</b>                | 13C                  | <b>Number of Transients</b> | 1000                 |
| <b>Origin</b>                 | spect                                          | <b>Owner</b>                 | 32768    | <b>Points Count</b>           | 32768                | <b>Pulse Sequence</b>       | dept135              |
| <b>Receiver Gain</b>          | 2050.00                                        | <b>Original Points Count</b> | 29761.90 | <b>Solvent</b>                | CHLOROFORM-d         | <b>Spectrum Offset (Hz)</b> | 12568.3320           |
| <b>Spectrum Type</b>          | DEPT135                                        | <b>SW(cyclical) (Hz)</b>     | 29761.00 | <b>Temperature (degree C)</b> | 22.000               |                             |                      |
|                               |                                                | <b>Sweep Width (Hz)</b>      | 29761.00 |                               |                      |                             |                      |

Wed3av500#001.002.001.1r.esp

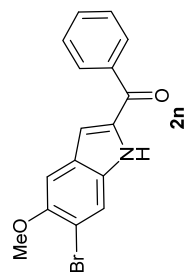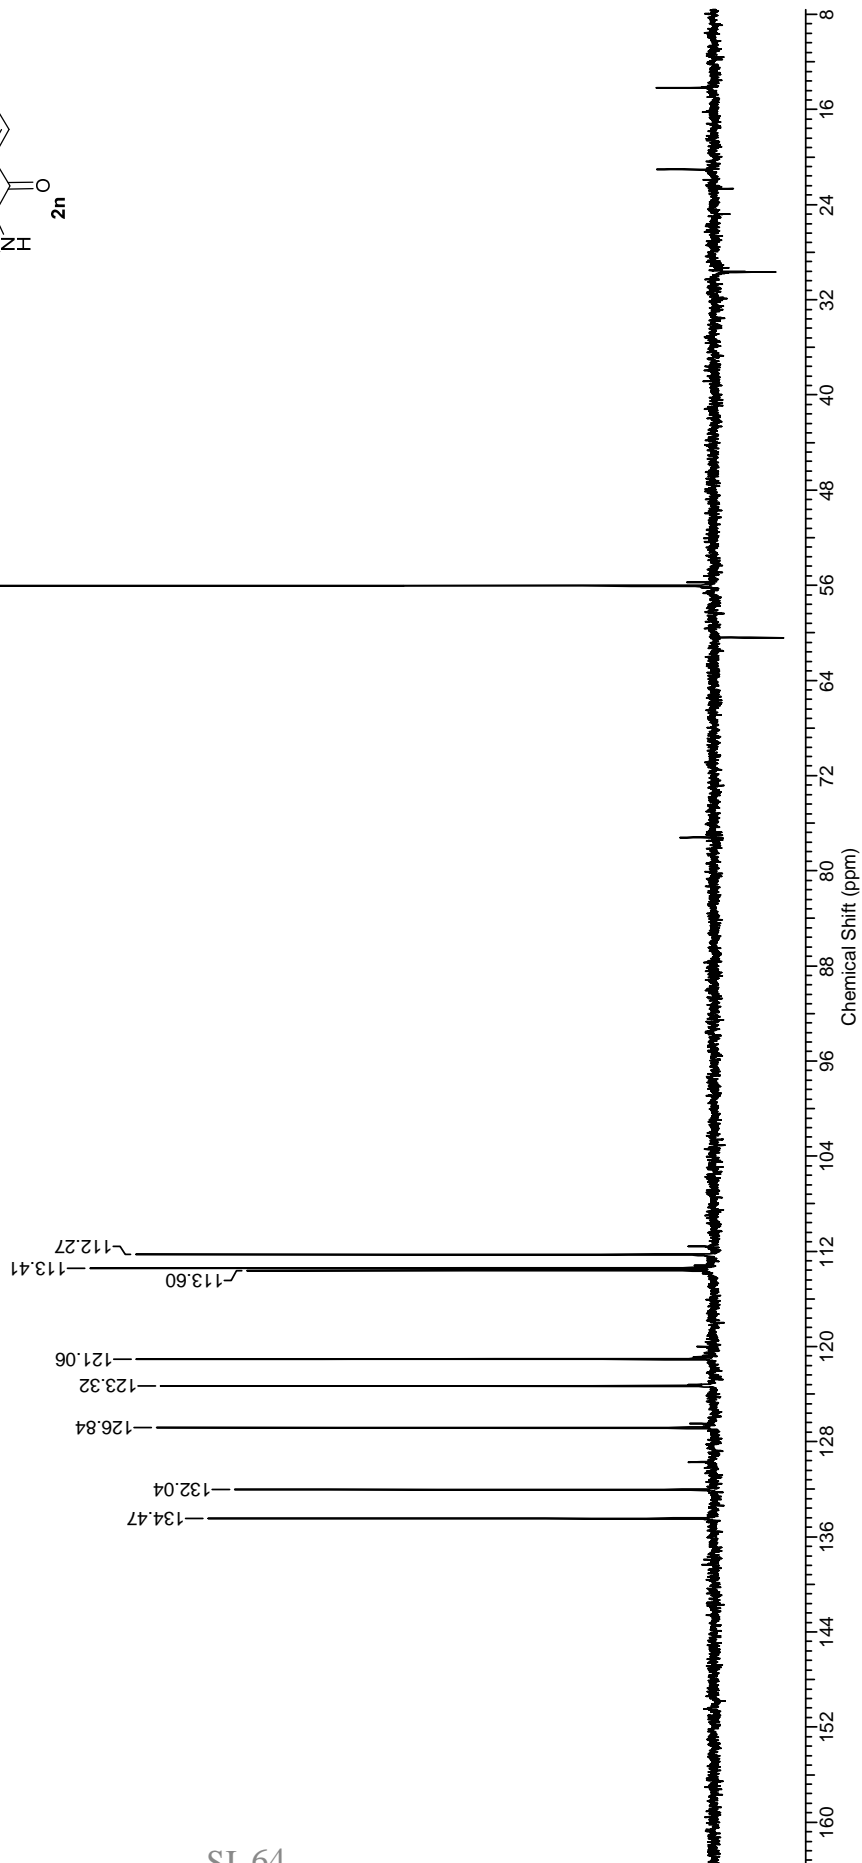



D:\Data\YM-990

9/16/2013 12:35:21 PM

YM-990 #1030 RT: 4.59 AV: 1 NL: 3.99E8  
T: FTMS + p ESI Full ms [100.00-700.00]

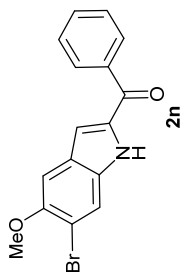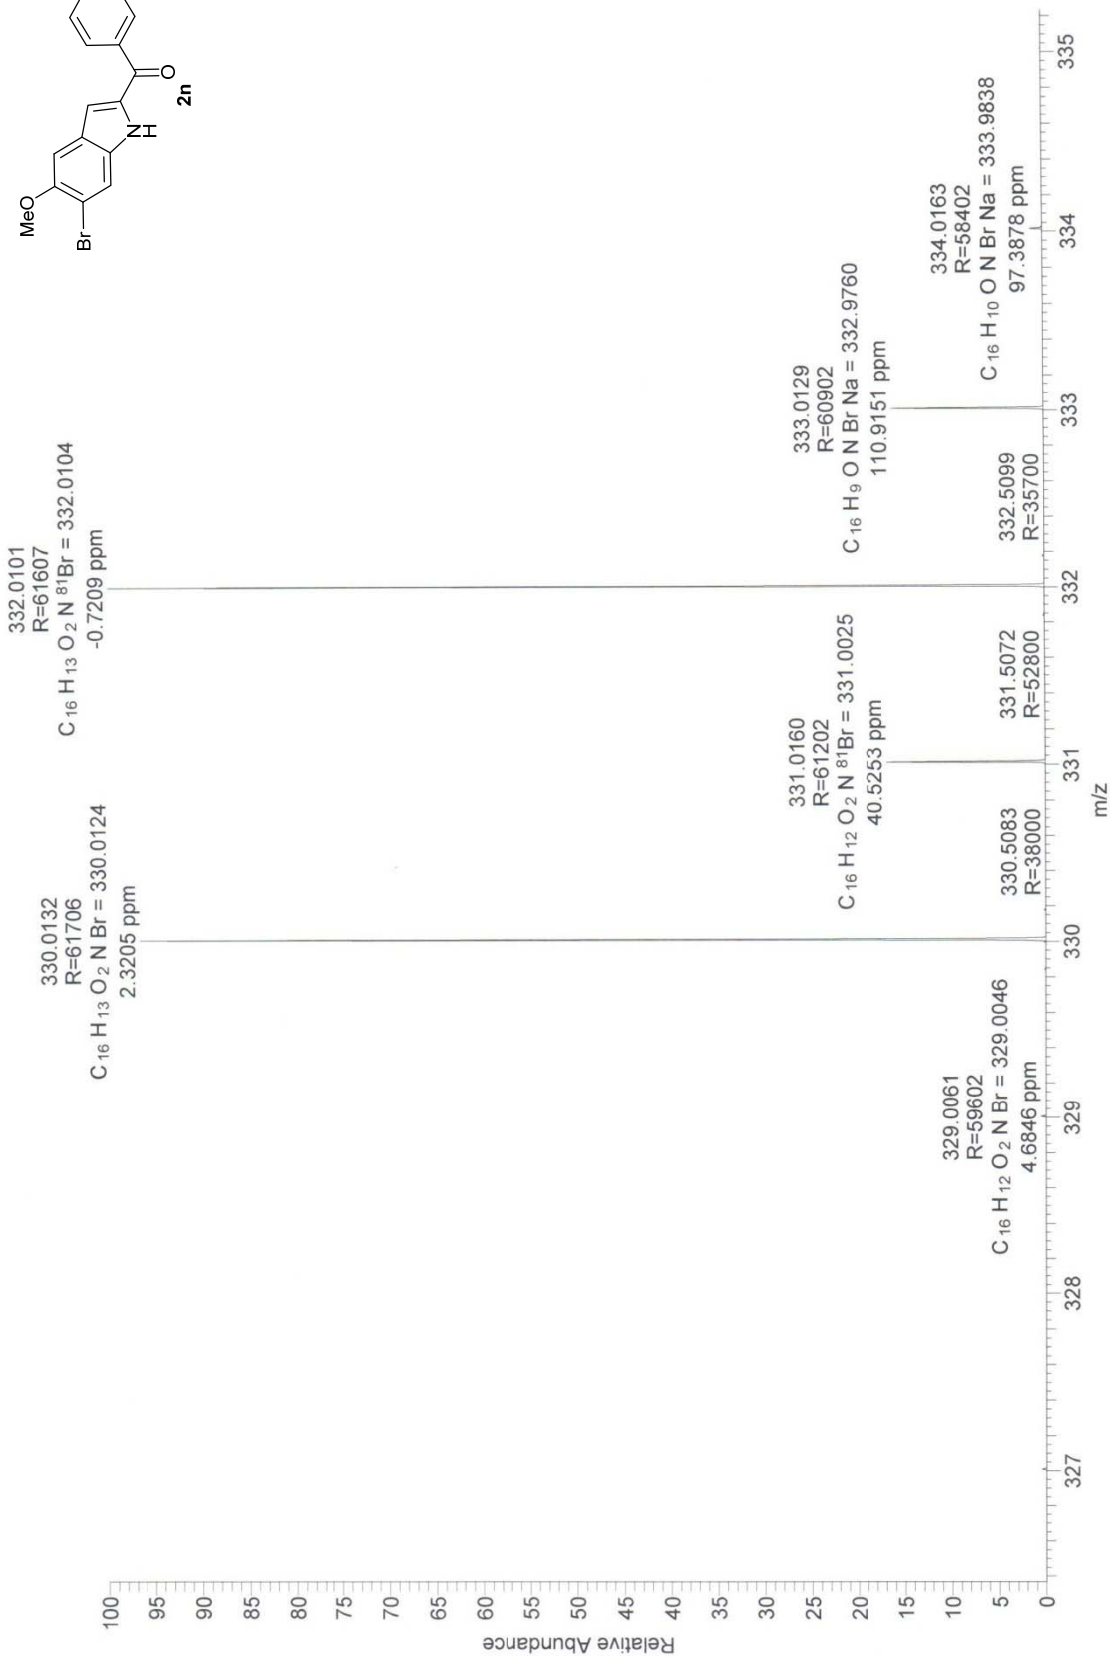

|                               |                      |                     |              |                              |                                                    |
|-------------------------------|----------------------|---------------------|--------------|------------------------------|----------------------------------------------------|
| <b>Acquisition Time (sec)</b> | 2.0031               | <b>Comment</b>      | Yogesh 1H    | <b>Date</b>                  | 19 Aug 2013 17:25:52                               |
| <b>Date Stamp</b>             | 19 Aug 2013 17:25:52 | <b>Nucleus</b>      | 1H           | <b>File Name</b>             | \\agn1\hmr_data\AV_500\Mon4av500#013\1\IPDATA\1\1r |
| <b>Frequency (MHz)</b>        | 500.13               | <b>Points Count</b> | 32768        | <b>Number of Transients</b>  | 64                                                 |
| <b>Owner</b>                  | nmr                  | <b>Solvent</b>      | CHLOROFORM-d | <b>Pulse Sequence</b>        | zg30                                               |
| <b>Temperature (degree C)</b> | 22.200               |                     |              | <b>Spectrum Offset (Hz)</b>  | 2219.7769                                          |
|                               |                      |                     |              | <b>Receiver Gain</b>         | STANDARD                                           |
|                               |                      |                     |              | <b>Sweep Width (Hz)</b>      | 9999.70                                            |
|                               |                      |                     |              | <b>Original Points Count</b> | 20031                                              |
|                               |                      |                     |              | <b>SW(cyclical) (Hz)</b>     | 10000.00                                           |

Mon4av500#013.001.001.1r.esp

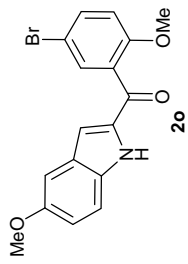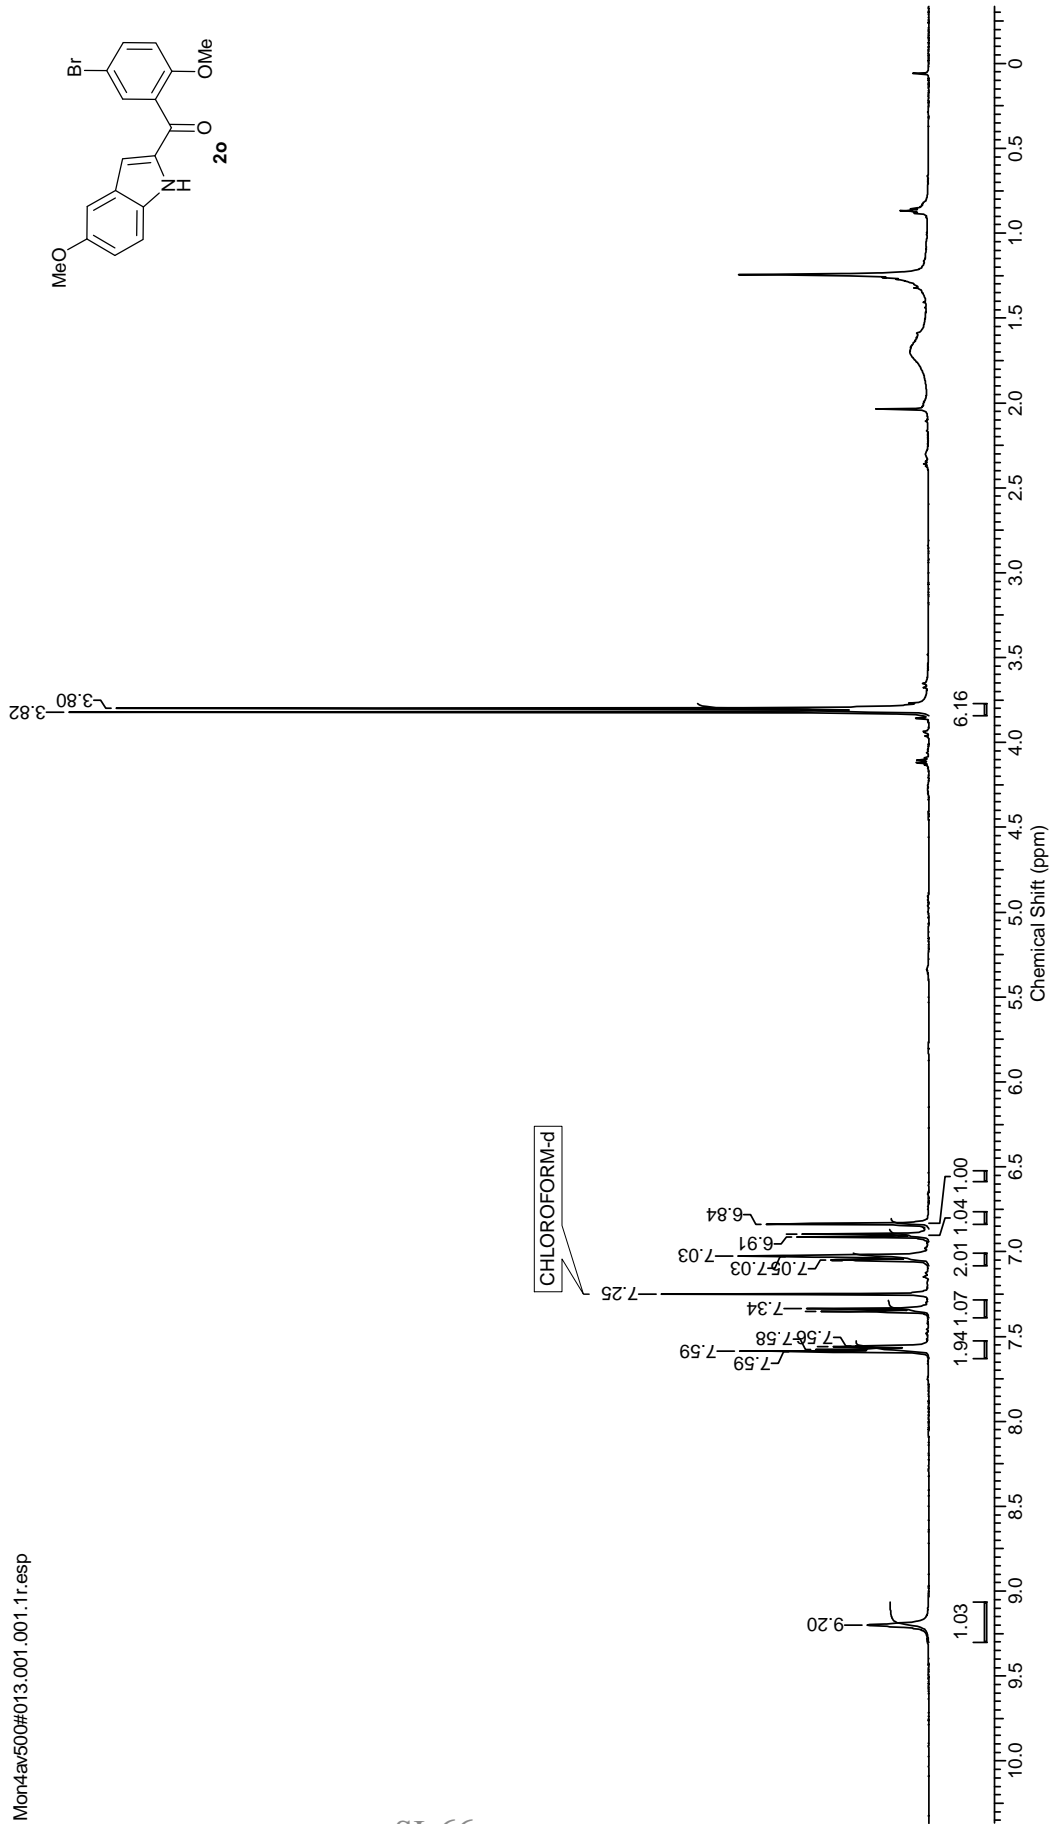

|                               |                      |                     |              |                              |                                                 |
|-------------------------------|----------------------|---------------------|--------------|------------------------------|-------------------------------------------------|
| <b>Acquisition Time (sec)</b> | 1.0486               | <b>Comment</b>      | 13C          | <b>Date</b>                  | 19 Aug 2013 20:08:00                            |
| <b>Date Stamp</b>             | 19 Aug 2013 20:08:00 | <b>Nucleus</b>      | 13C          | <b>File Name</b>             | \\agninmr_data\AV_500\Mon4av500#013\3\PDATA\11r |
| <b>Frequency (MHz)</b>        | 125.76               | <b>Points Count</b> | 32768        | <b>Number of Transients</b>  | 2102                                            |
| <b>Owner</b>                  | nmr                  | <b>Solvent</b>      | CHLOROFORM-d | <b>Pulse Sequence</b>        | zgpg30                                          |
| <b>Temperature (degree C)</b> | 22.800               |                     |              | <b>Spectrum Offset (Hz)</b>  | 11982.1816                                      |
|                               |                      |                     |              | <b>Receiver Gain</b>         | 575.00                                          |
|                               |                      |                     |              | <b>Spectrum Type</b>         | STANDARD                                        |
|                               |                      |                     |              | <b>Original Points Count</b> | 32768                                           |
|                               |                      |                     |              | <b>SW(cyclical) (Hz)</b>     | 31250.00                                        |
|                               |                      |                     |              | <b>Sweep Width (Hz)</b>      | 31249.05                                        |

Mon4av500#013.003.001.1r.esp

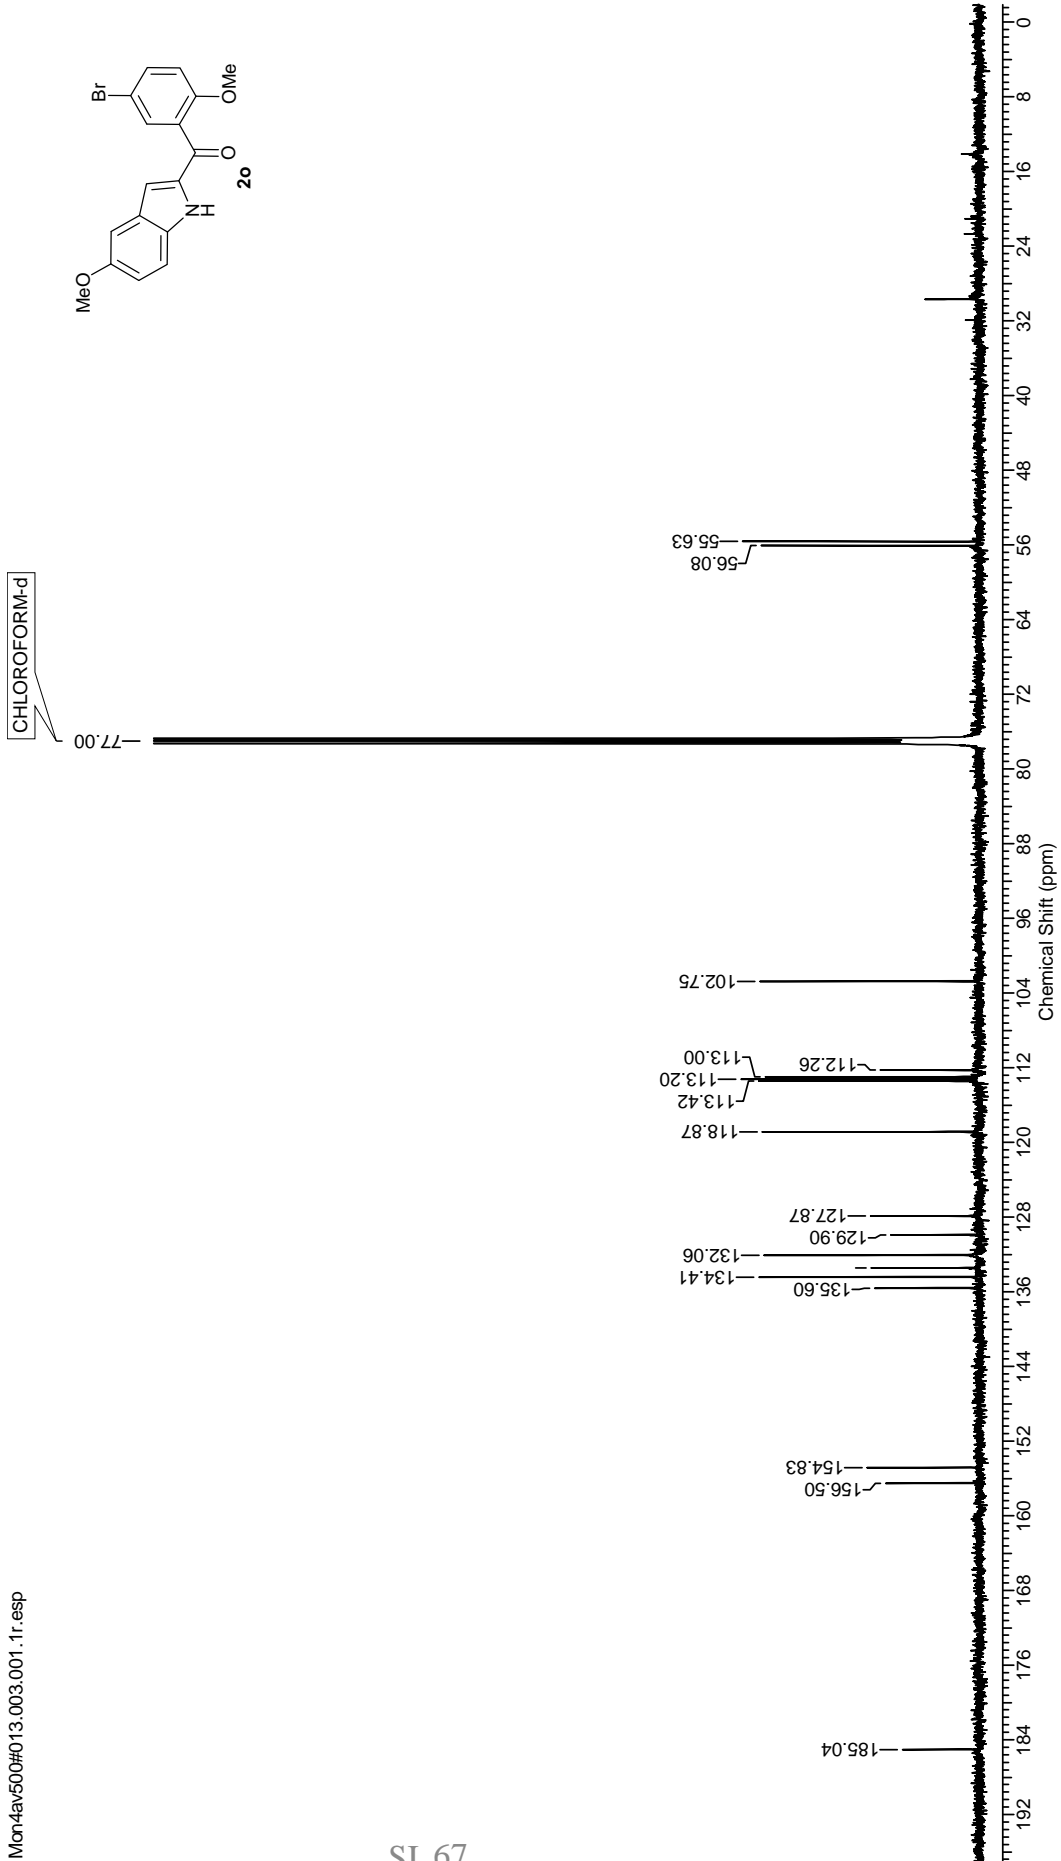

|                               |                      |                              |            |                             |                                                   |
|-------------------------------|----------------------|------------------------------|------------|-----------------------------|---------------------------------------------------|
| <b>Acquisition Time (sec)</b> | 1.1010               | <b>Comment</b>               | DEPT;      | <b>Date</b>                 | 19 Aug 2013 18:19:12                              |
| <b>Date Stamp</b>             | 19 Aug 2013 18:19:12 | <b>Nucleus</b>               | 13C        | <b>File Name</b>            | \\agn\nmr_data\AV_500\Mon4av500#013\2\PD\DATA\11r |
| <b>Frequency (MHz)</b>        | 125.76               | <b>Points Count</b>          | 32768      | <b>Number of Transients</b> | 1200                                              |
| <b>Owner</b>                  | nmr                  | <b>Spectrum Type</b>         | DEPT135    | <b>Receiver Gain</b>        | 2050.00                                           |
| <b>Solvent</b>                | CHLOROFORM-d         | <b>Original Points Count</b> | 32768      | <b>SW(cyclical) (Hz)</b>    | 29761.90                                          |
| <b>Temperature (degree C)</b> | 22.500               | <b>Spectrum Offset (Hz)</b>  | 12571.2676 | <b>Sweep Width (Hz)</b>     | 29761.00                                          |

Mon4av500#013.002.001.1r.esp

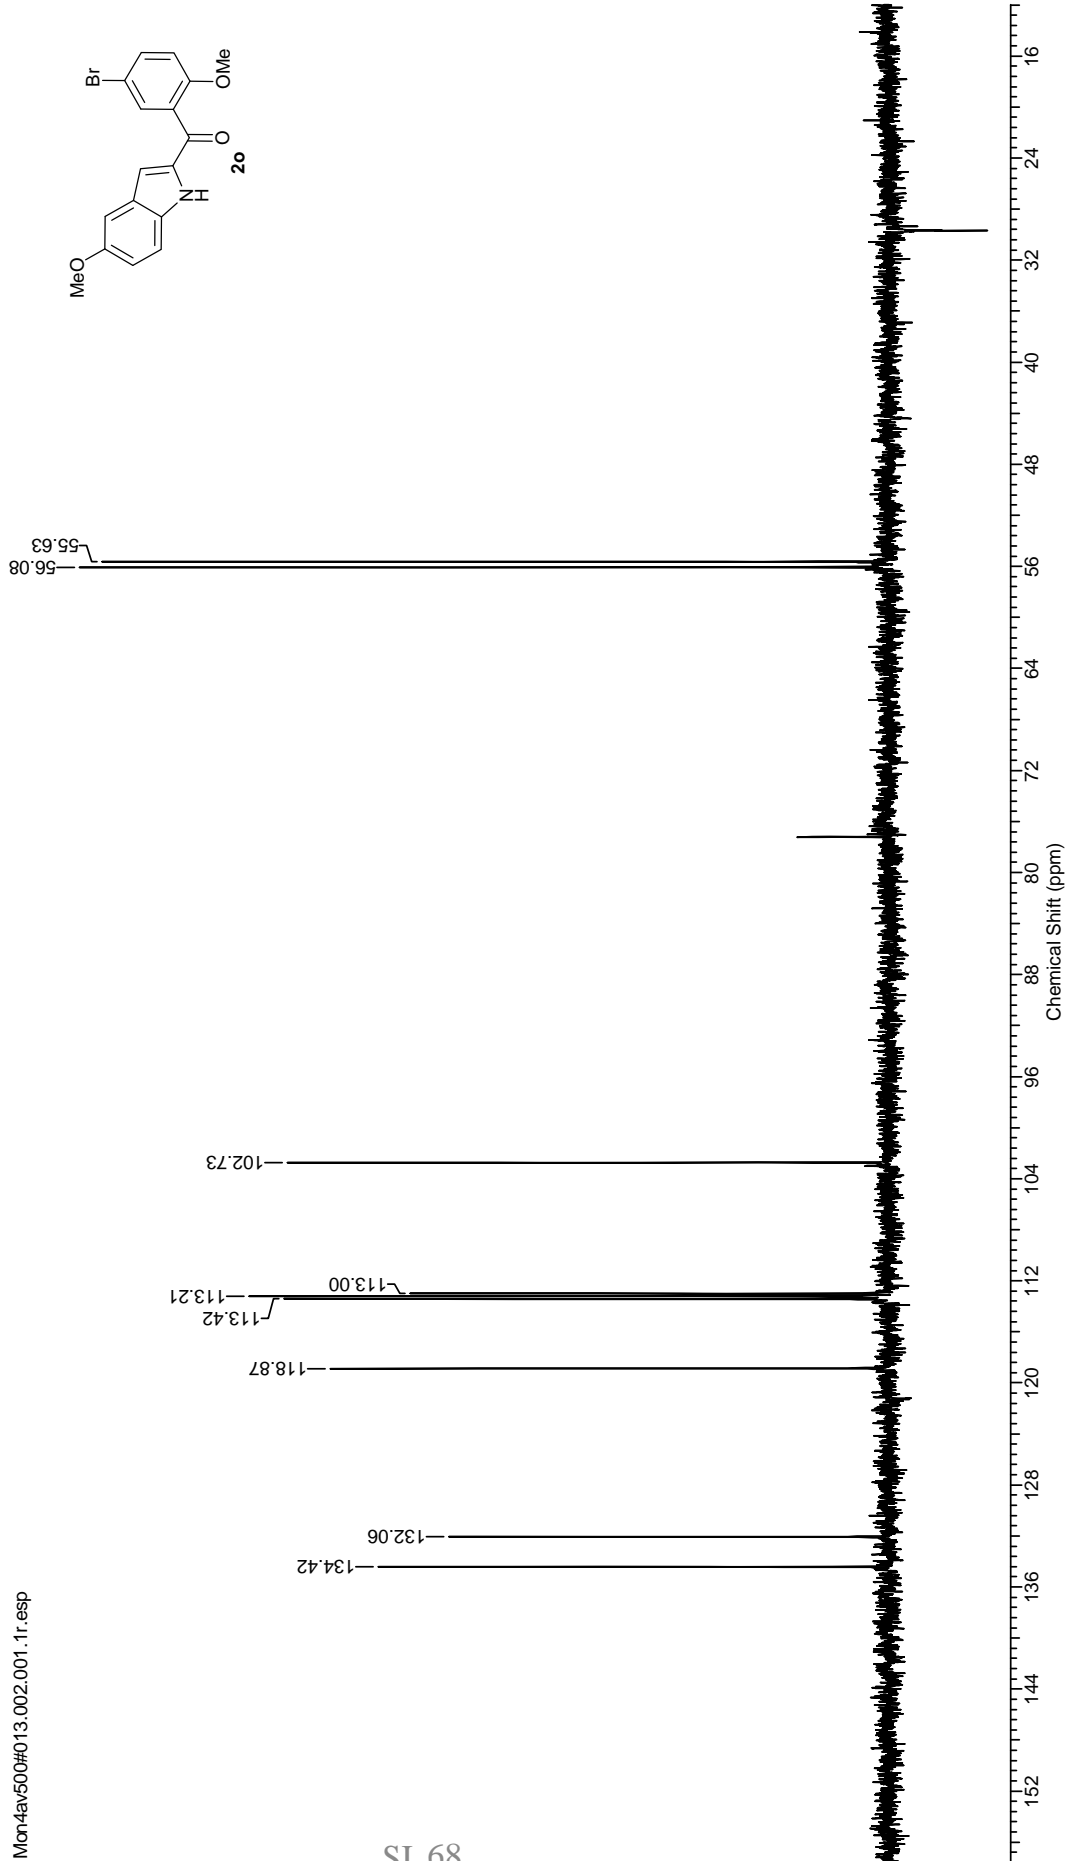

D:\Data\YM-976

9/16/2013 12:13:01 PM

YM-976 #1015 RT: 4.52 AV: 1 NL: 4.79E8  
T: FTMS + p ESI Full ms [100.00-700.00]

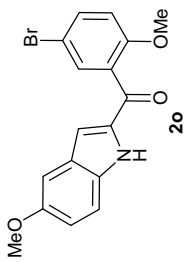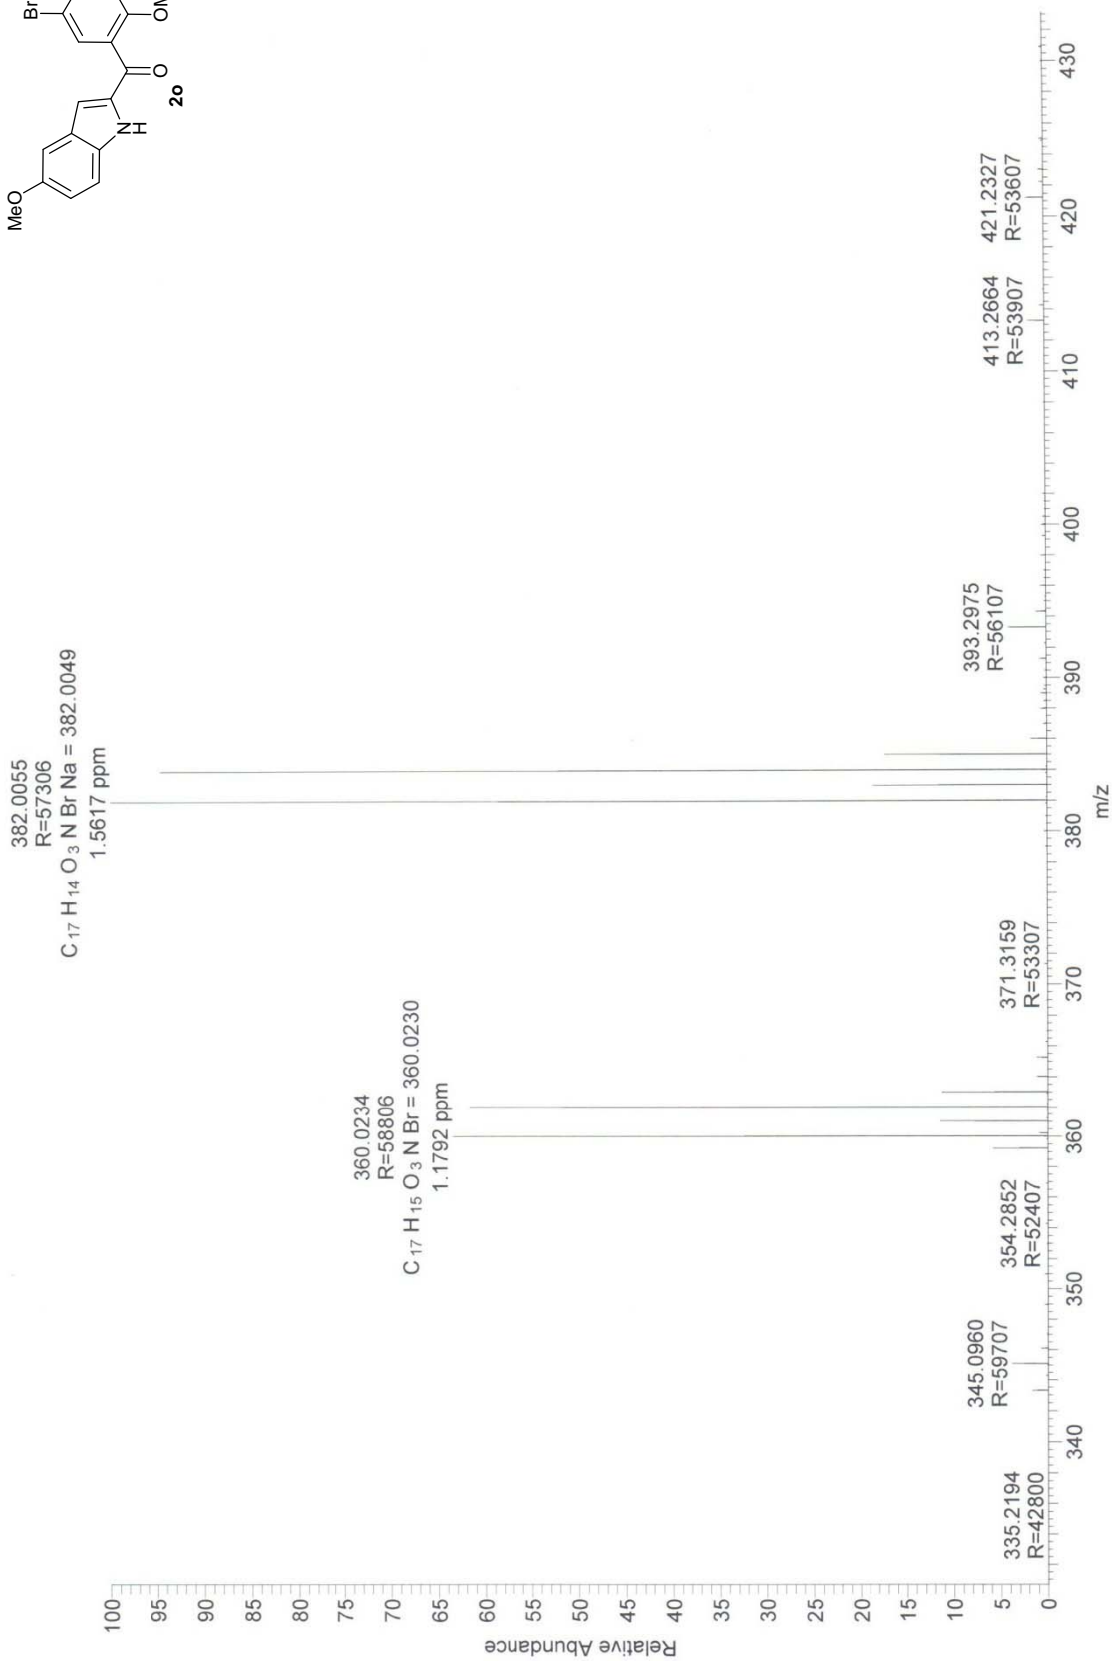

|                               |                                           |                              |           |                               |                      |                             |                      |
|-------------------------------|-------------------------------------------|------------------------------|-----------|-------------------------------|----------------------|-----------------------------|----------------------|
| <b>Acquisition Time (sec)</b> | 2.0031                                    | <b>Comment</b>               | yogesh 1H | <b>Date</b>                   | 16 Aug 2013 13:29:04 | <b>Date Stamp</b>           | 16 Aug 2013 13:29:04 |
| <b>File Name</b>              | H:\New folder\Fri3av500#010\1\VPDATA\1\1r | <b>Frequency (MHz)</b>       | 500.13    | <b>Nucleus</b>                | 1H                   | <b>Number of Transients</b> | 64                   |
| <b>Origin</b>                 | spect                                     | <b>Original Points Count</b> | 20031     | <b>Owner</b>                  | 32768                | <b>Pulse Sequence</b>       | zg30                 |
| <b>Receiver Gain</b>          | 322.00                                    | <b>SW(cyclical) (Hz)</b>     | 10000.00  | <b>Solvent</b>                | CHLOROFORM-d         | <b>Spectrum Offset (Hz)</b> | 2209.7742            |
| <b>Spectrum Type</b>          | STANDARD                                  | <b>Sweep Width (Hz)</b>      | 9999.70   | <b>Temperature (degree C)</b> | 22.400               |                             |                      |

Fri3av500#010.001.001.1r.esp

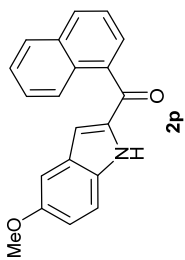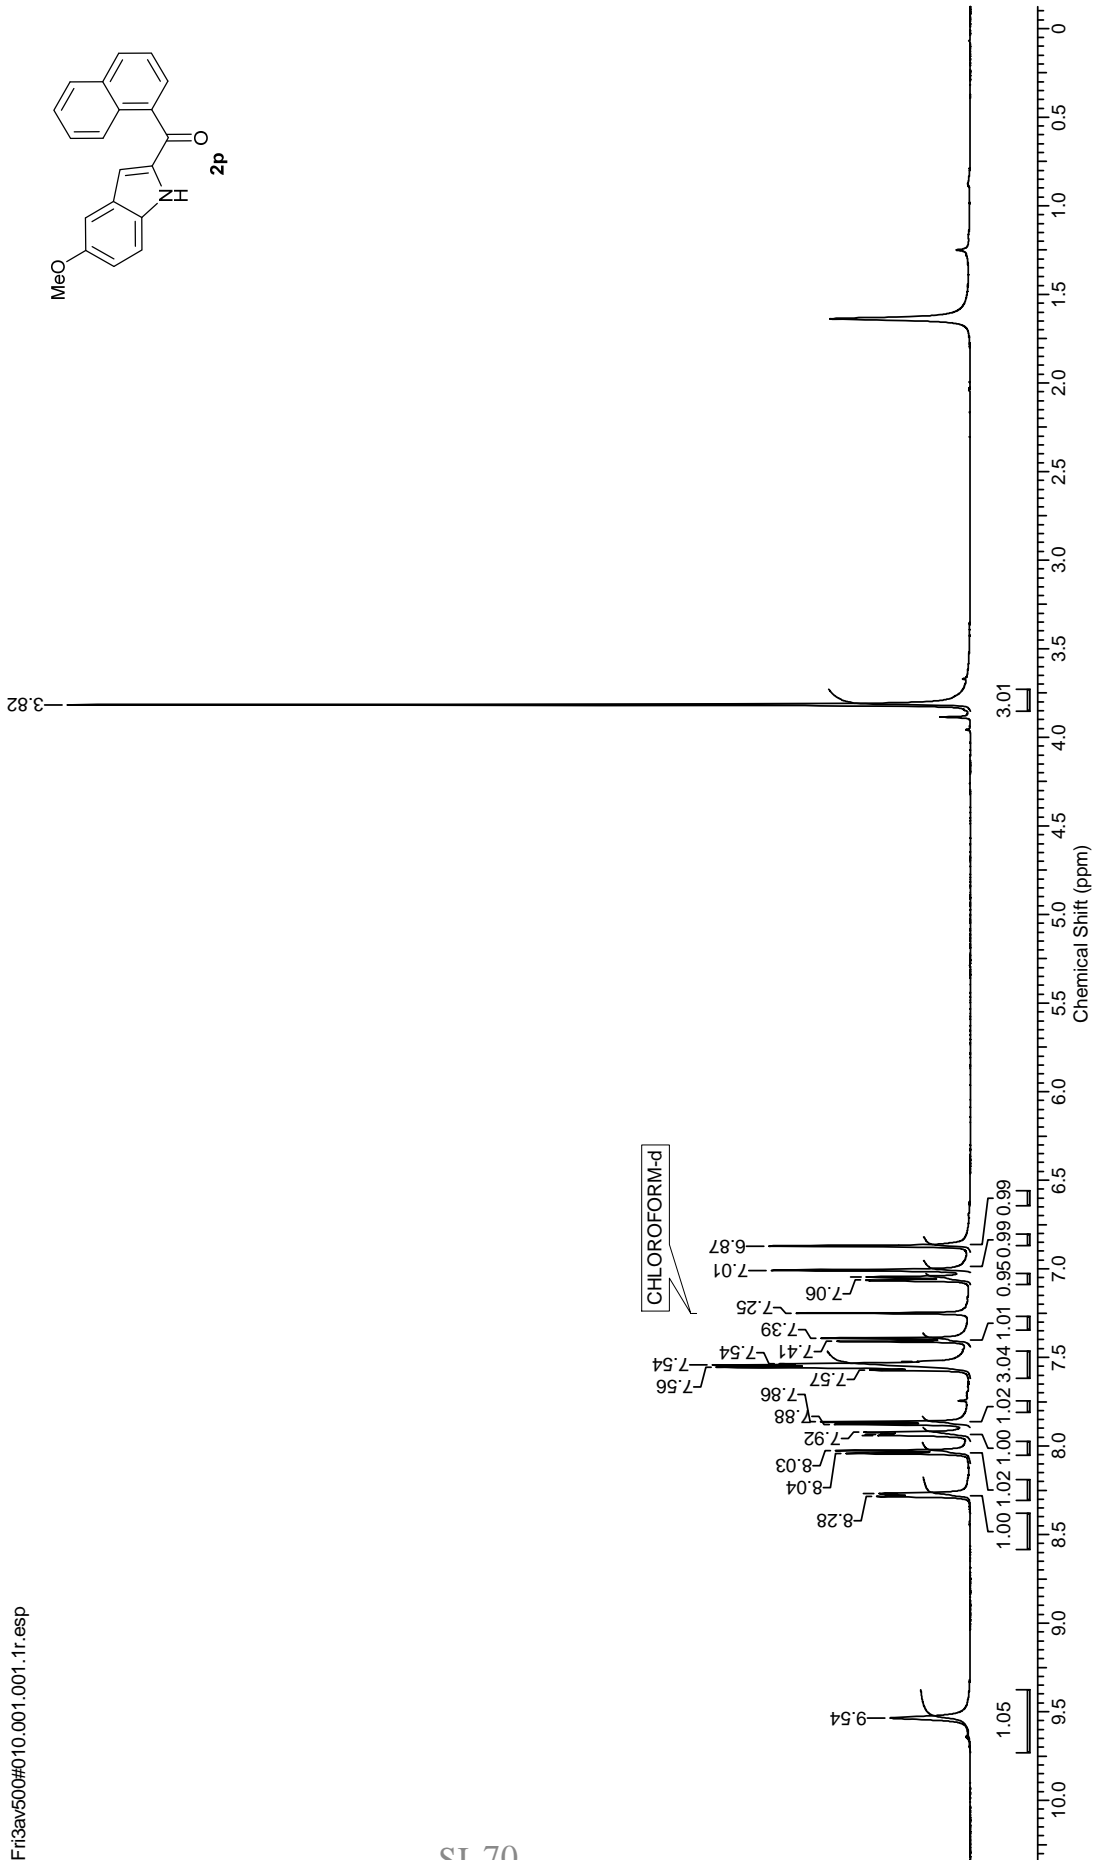

| Acquisition Time (sec) | 1.0486                                   | Date                   | 16 Aug 2013 15:00:48 | Date Stamp           | 16 Aug 2013 15:00:48 |
|------------------------|------------------------------------------|------------------------|----------------------|----------------------|----------------------|
| File Name              | H:\New folder\Fri3av500#010\3\PDATA\1\1r | Frequency (MHz)        | 125.76               | Nucleus              | <sup>13</sup> C      |
| Origin                 | spect                                    | Owner                  | nmr                  | Points Count         | 32768                |
| Receiver Gain          | 575.00                                   | Solvent                | CHLOROFORM-d         | Spectrum Offset (Hz) | 11981.2275           |
| Spectrum Type          | STANDARD                                 | Temperature (degree C) | 23.400               |                      |                      |
|                        |                                          | Original Points Count  | 32768                |                      |                      |
|                        |                                          | SW(cyclical) (Hz)      | 31250.00             |                      |                      |
|                        |                                          | Sweep Width (Hz)       | 31249.05             |                      |                      |

Fri3av500#010.003.001.1r.esp

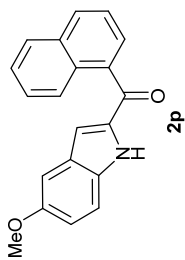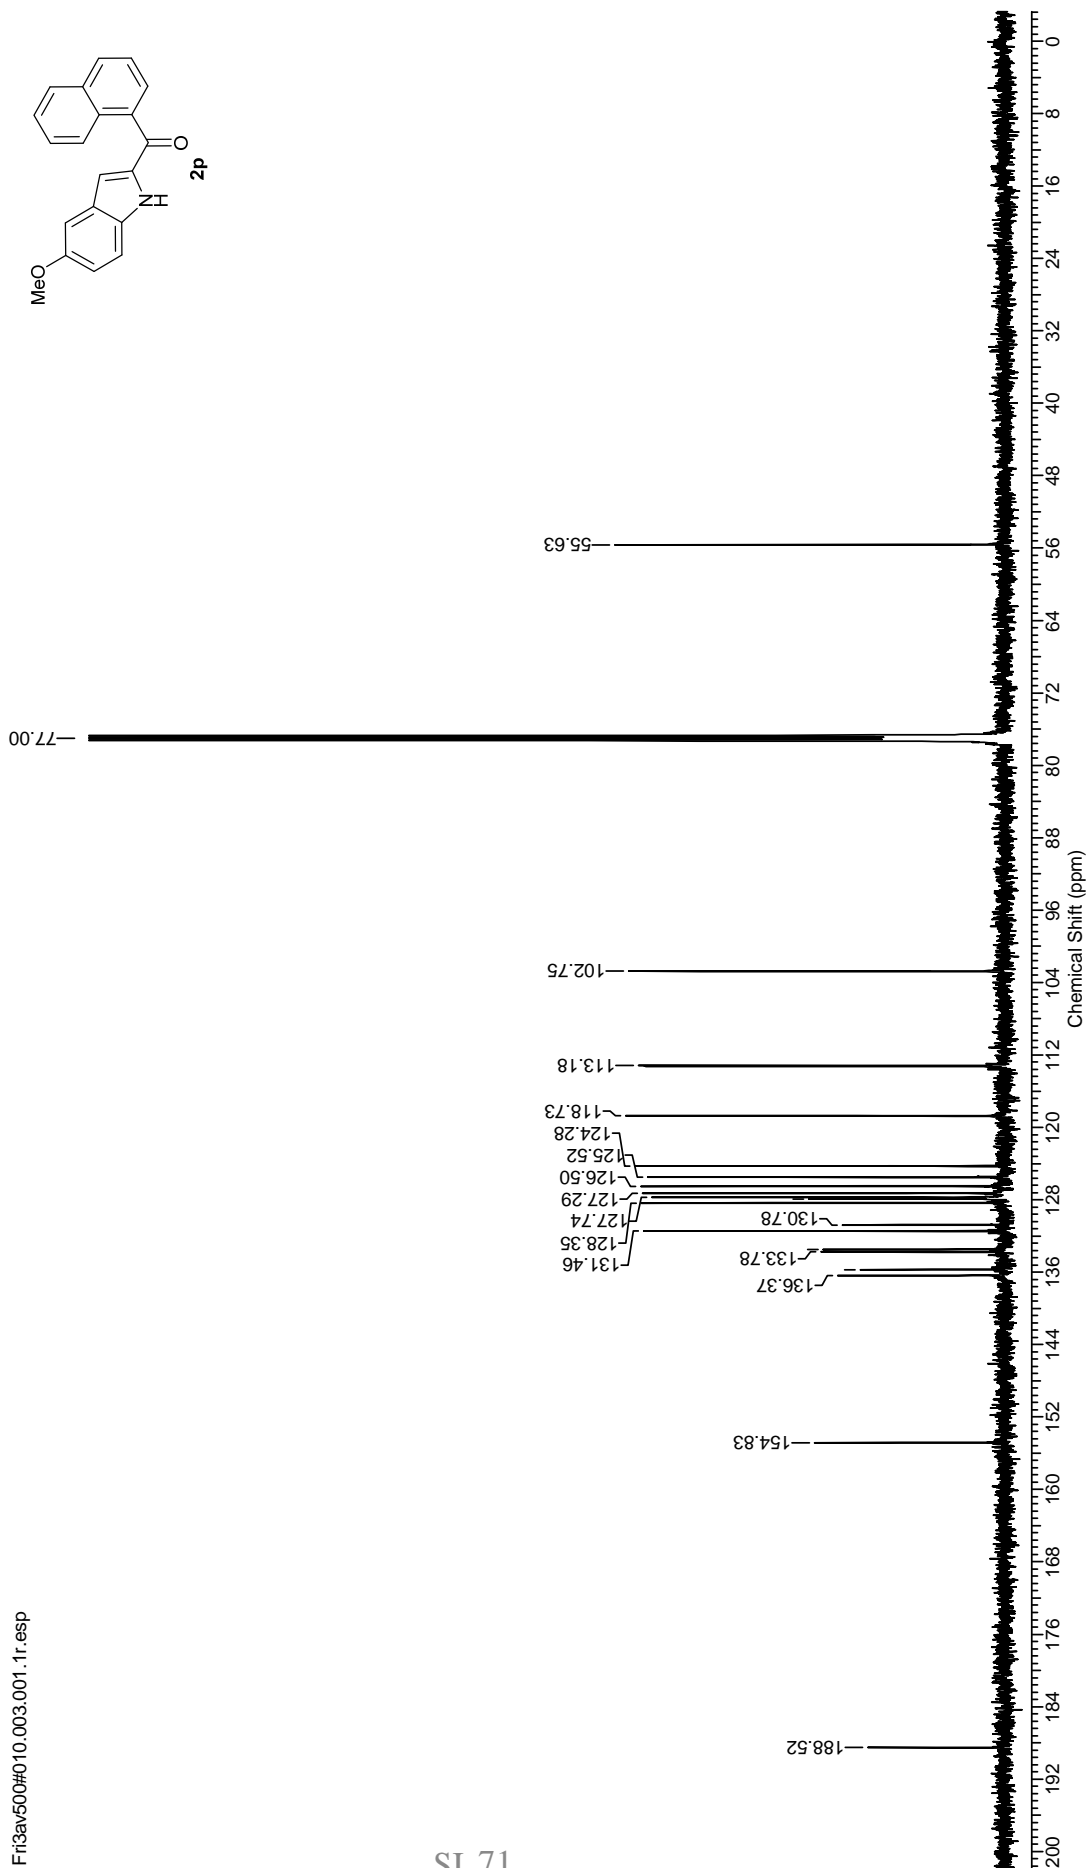

|                               |                                          |                              |          |                               |                      |                             |                      |
|-------------------------------|------------------------------------------|------------------------------|----------|-------------------------------|----------------------|-----------------------------|----------------------|
| <b>Acquisition Time (sec)</b> | 1.1010                                   | <b>Comment</b>               | DEPT;    | <b>Date</b>                   | 16 Aug 2013 13:44:00 | <b>Date Stamp</b>           | 16 Aug 2013 13:44:00 |
| <b>File Name</b>              | H:\New folder\Fri3av500#0102\PDATA\11\Fr |                              |          | <b>Frequency (MHz)</b>        | 125.76               | <b>Nucleus</b>              | <sup>13</sup> C      |
| <b>Origin</b>                 | spect                                    | <b>Original Points Count</b> | 32768    | <b>Owner</b>                  | nmr                  | <b>Points Count</b>         | 32768                |
| <b>Receiver Gain</b>          | 2050.00                                  | <b>SW(cyclical) (Hz)</b>     | 29761.90 | <b>Solvent</b>                | CHLOROFORM-d         | <b>Spectrum Offset (Hz)</b> | 12570.3594           |
| <b>Spectrum Type</b>          | DEPT135                                  | <b>Sweep Width (Hz)</b>      | 29761.00 | <b>Temperature (degree C)</b> | 22.800               |                             |                      |

Fri3av500#010.002.001.1r.esp

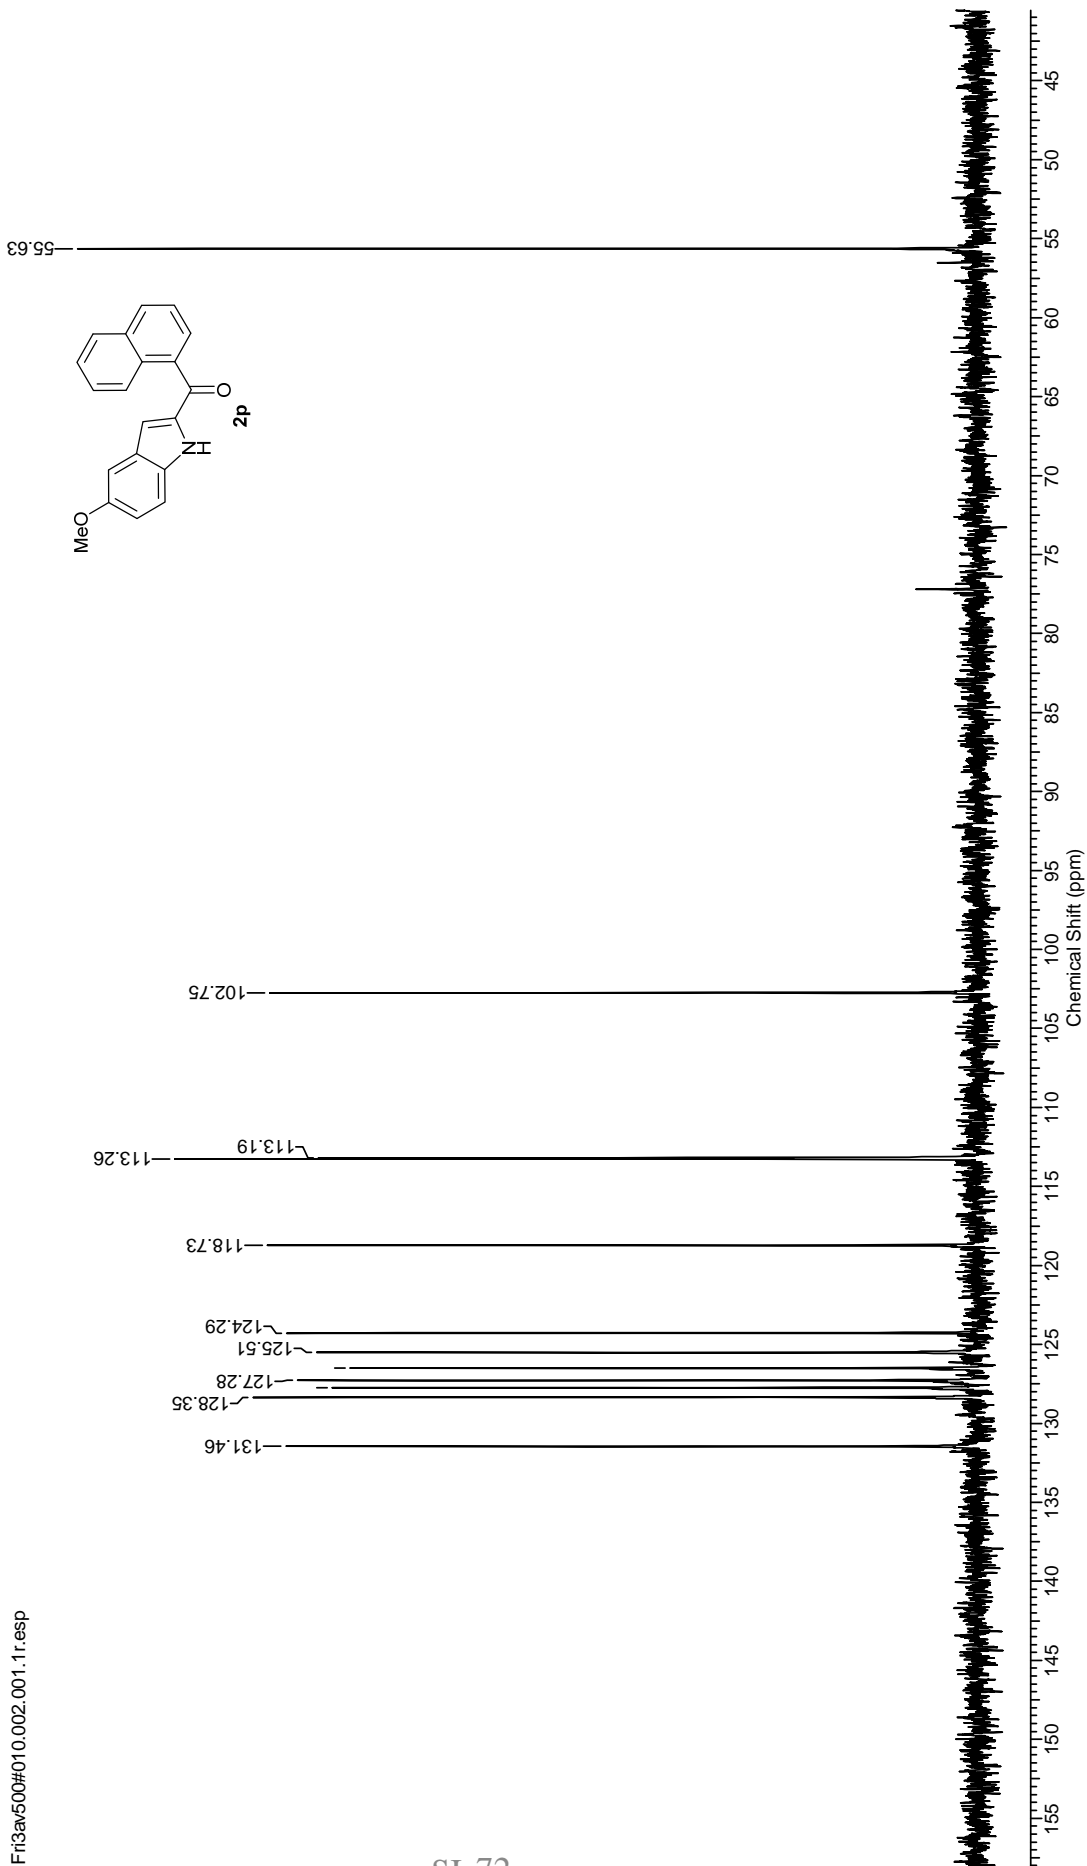



|                               |                                           |                              |           |                               |                      |                             |                      |
|-------------------------------|-------------------------------------------|------------------------------|-----------|-------------------------------|----------------------|-----------------------------|----------------------|
| <b>Acquisition Time (sec)</b> | 2.0031                                    | <b>Comment</b>               | Yogesh 1H | <b>Date</b>                   | 17 Aug 2013 15:02:56 | <b>Date Stamp</b>           | 17 Aug 2013 15:02:56 |
| <b>File Name</b>              | E:\New folder\Sat3av500#014\1\IPDATA\1\1r | <b>Original Points Count</b> | 20031     | <b>Frequency (MHz)</b>        | 500.13               | <b>Nucleus</b>              | 1H                   |
| <b>Origin</b>                 | spect                                     | <b>SW(cyclical) (Hz)</b>     | 10000.00  | <b>Owner</b>                  | nmr                  | <b>Points Count</b>         | 32768                |
| <b>Receiver Gain</b>          | 322.00                                    | <b>Sweep Width (Hz)</b>      | 9999.70   | <b>Solvent</b>                | CHLOROFORM-d         | <b>Pulse Sequence</b>       | zg30                 |
| <b>Spectrum Type</b>          | STANDARD                                  |                              |           | <b>Temperature (degree C)</b> | 22.700               | <b>Spectrum Offset (Hz)</b> | 2209.7742            |

Sat3av500#014.001.001.1r.esp

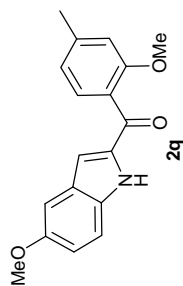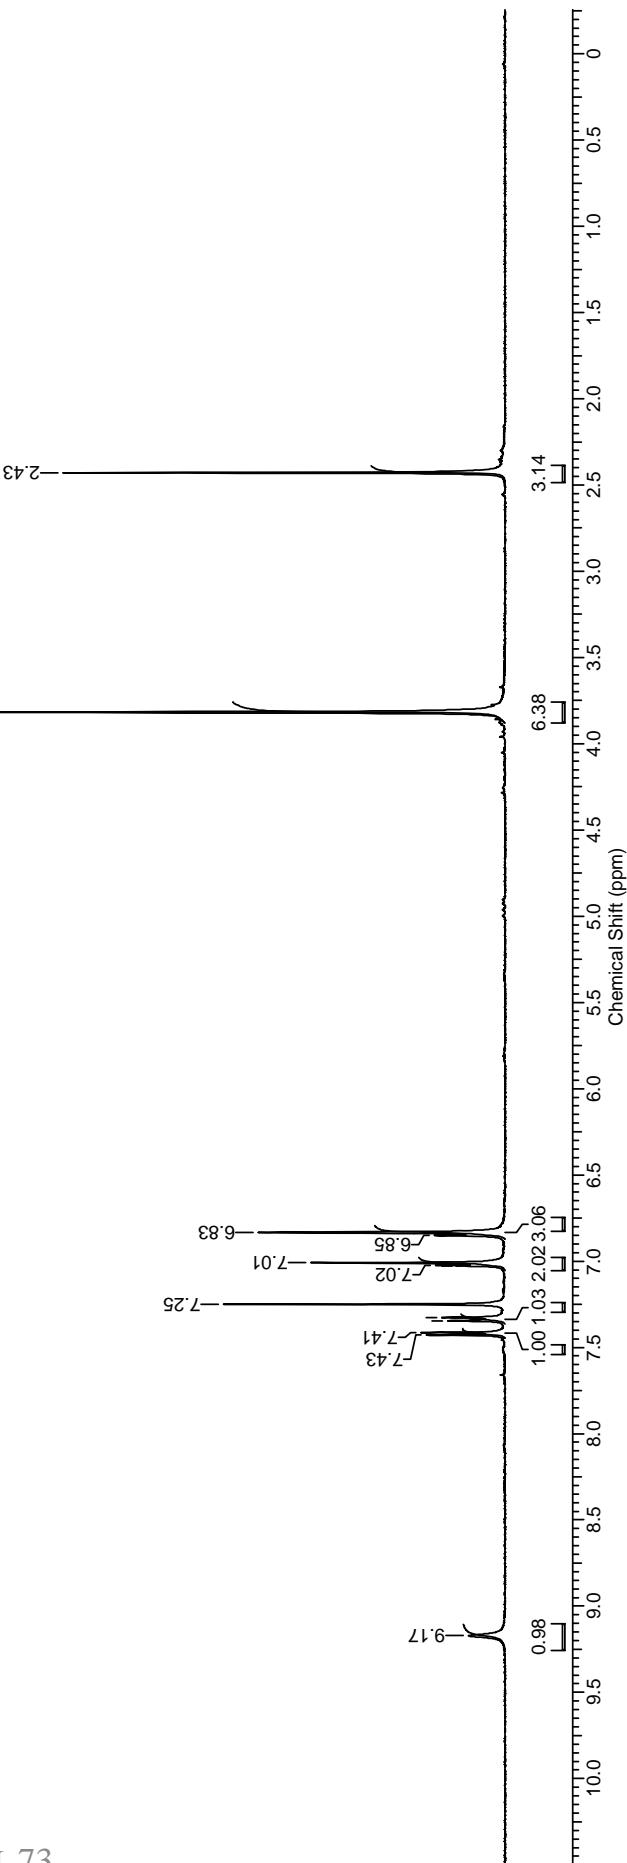

|                               |                                          |                              |          |                               |                      |                             |                      |
|-------------------------------|------------------------------------------|------------------------------|----------|-------------------------------|----------------------|-----------------------------|----------------------|
| <b>Acquisition Time (sec)</b> | 1.0486                                   | <b>Comment</b>               | 13C      | <b>Date</b>                   | 17 Aug 2013 15:43:28 | <b>Date Stamp</b>           | 17 Aug 2013 15:43:28 |
| <b>File Name</b>              | E:\New folder\Sat3av500#014\3\PDATA\1\1r | <b>Frequency (MHz)</b>       | 125.76   | <b>Nucleus</b>                | 13C                  | <b>Number of Transients</b> | 959                  |
| <b>Origin</b>                 | spect                                    | <b>Original Points Count</b> | 32768    | <b>Owner</b>                  | nmr                  | <b>Pulse Sequence</b>       | zpgg30               |
| <b>Receiver Gain</b>          | 575.00                                   | <b>SW(cyclical) (Hz)</b>     | 31250.00 | <b>Solvent</b>                | CHLOROFORM-d         | <b>Spectrum Offset (Hz)</b> | 11982.1826           |
| <b>Spectrum Type</b>          | STANDARD                                 | <b>Sweep Width (Hz)</b>      | 31249.05 | <b>Temperature (degree C)</b> | 23.500               |                             |                      |

Sat3av500#014.003.001.1r.esp

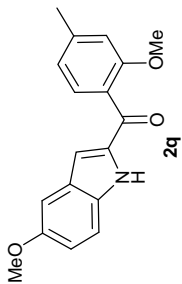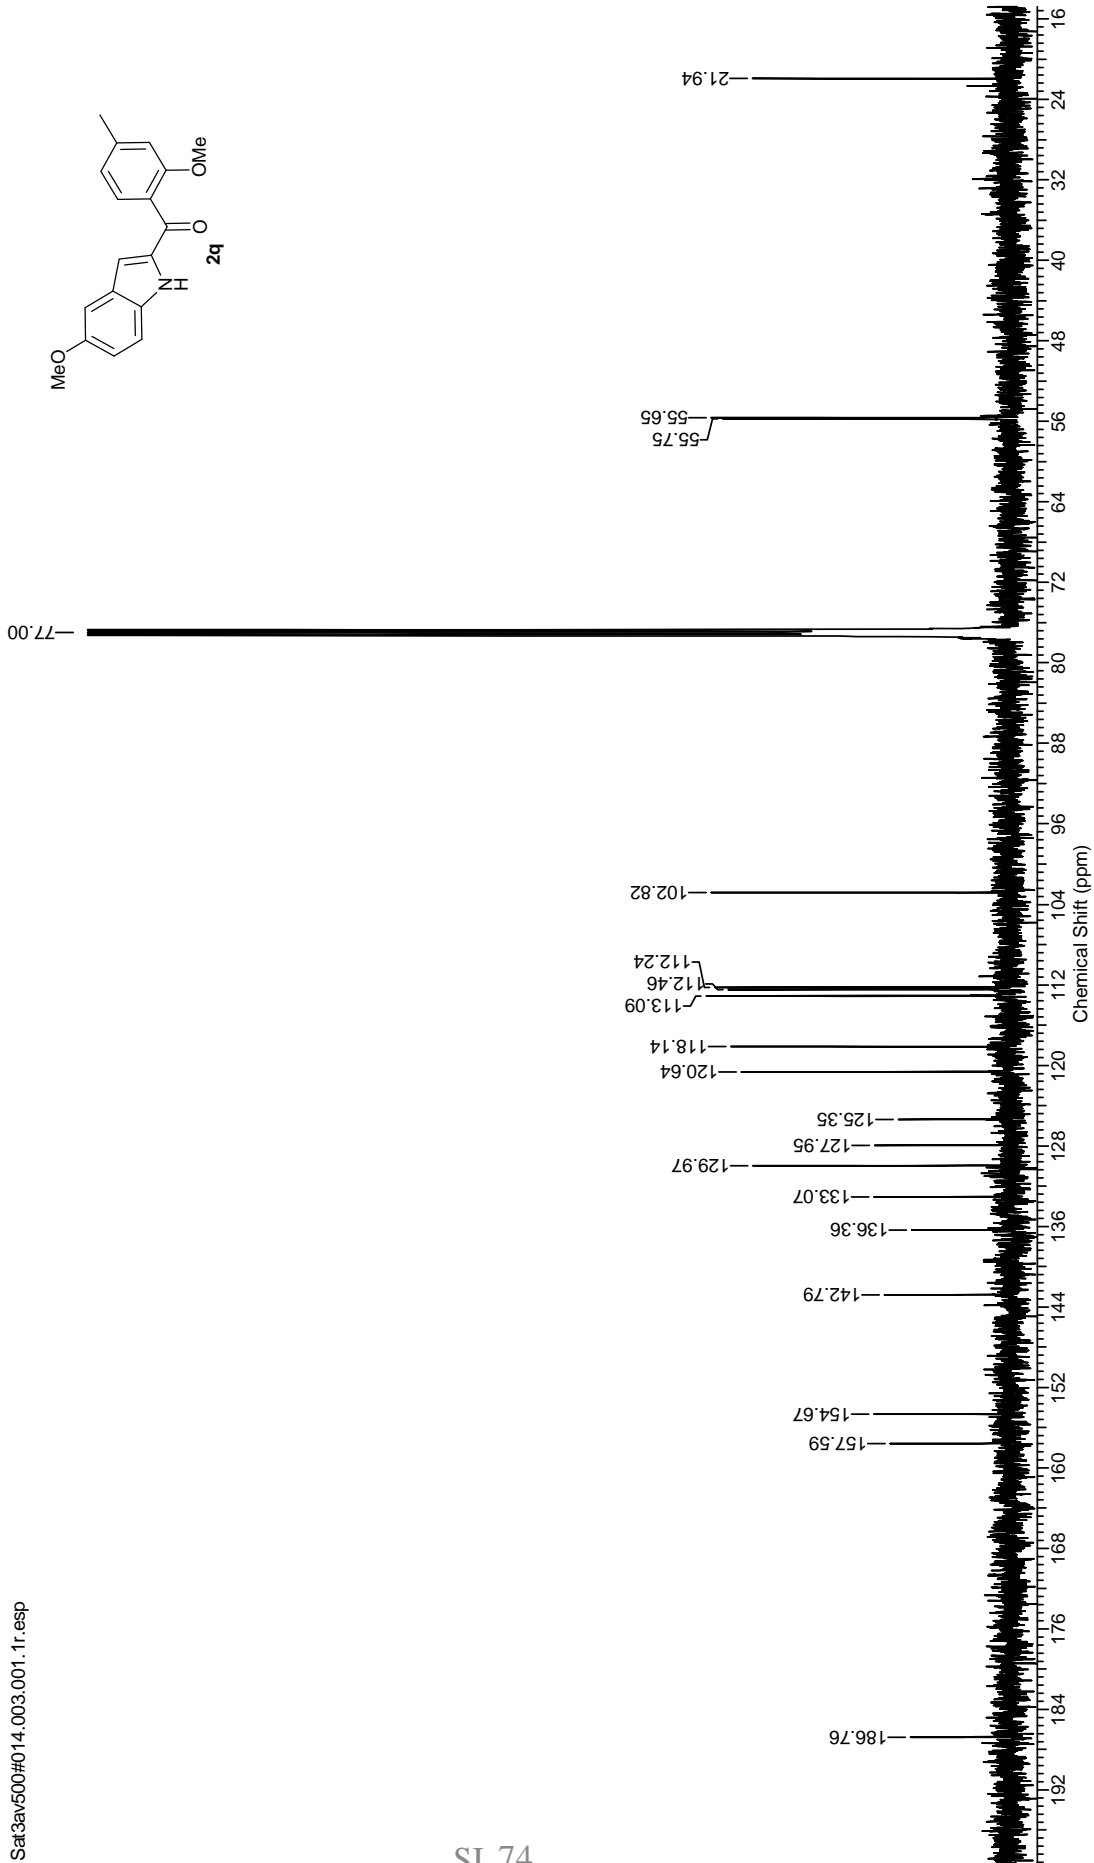

|                               |                                          |                              |          |                               |                      |                             |                      |
|-------------------------------|------------------------------------------|------------------------------|----------|-------------------------------|----------------------|-----------------------------|----------------------|
| <b>Acquisition Time (sec)</b> | 1.1010                                   | <b>Comment</b>               | DEPT;    | <b>Date</b>                   | 17 Aug 2013 15:02:56 | <b>Date Stamp</b>           | 17 Aug 2013 15:02:56 |
| <b>File Name</b>              | E:\New folder\Sat3av500#014\2\PDATA\1\1r | <b>Original Points Count</b> | 32768    | <b>Frequency (MHz)</b>        | 125.76               | <b>Number of Transients</b> | 600                  |
| <b>Origin</b>                 | spect                                    | <b>SW(cyclical) (Hz)</b>     | 29761.90 | <b>Owner</b>                  | nmr                  | <b>Points Count</b>         | 32768                |
| <b>Receiver Gain</b>          | 2050.00                                  | <b>Sweep Width (Hz)</b>      | 29761.00 | <b>Solvent</b>                | CHLOROFORM-d         | <b>Spectrum Offset (Hz)</b> | 12570.6182           |
| <b>Spectrum Type</b>          | DEPT135                                  |                              |          | <b>Temperature (degree C)</b> | 22.900               |                             |                      |

Sat3av500#014.002.001.1r.esp

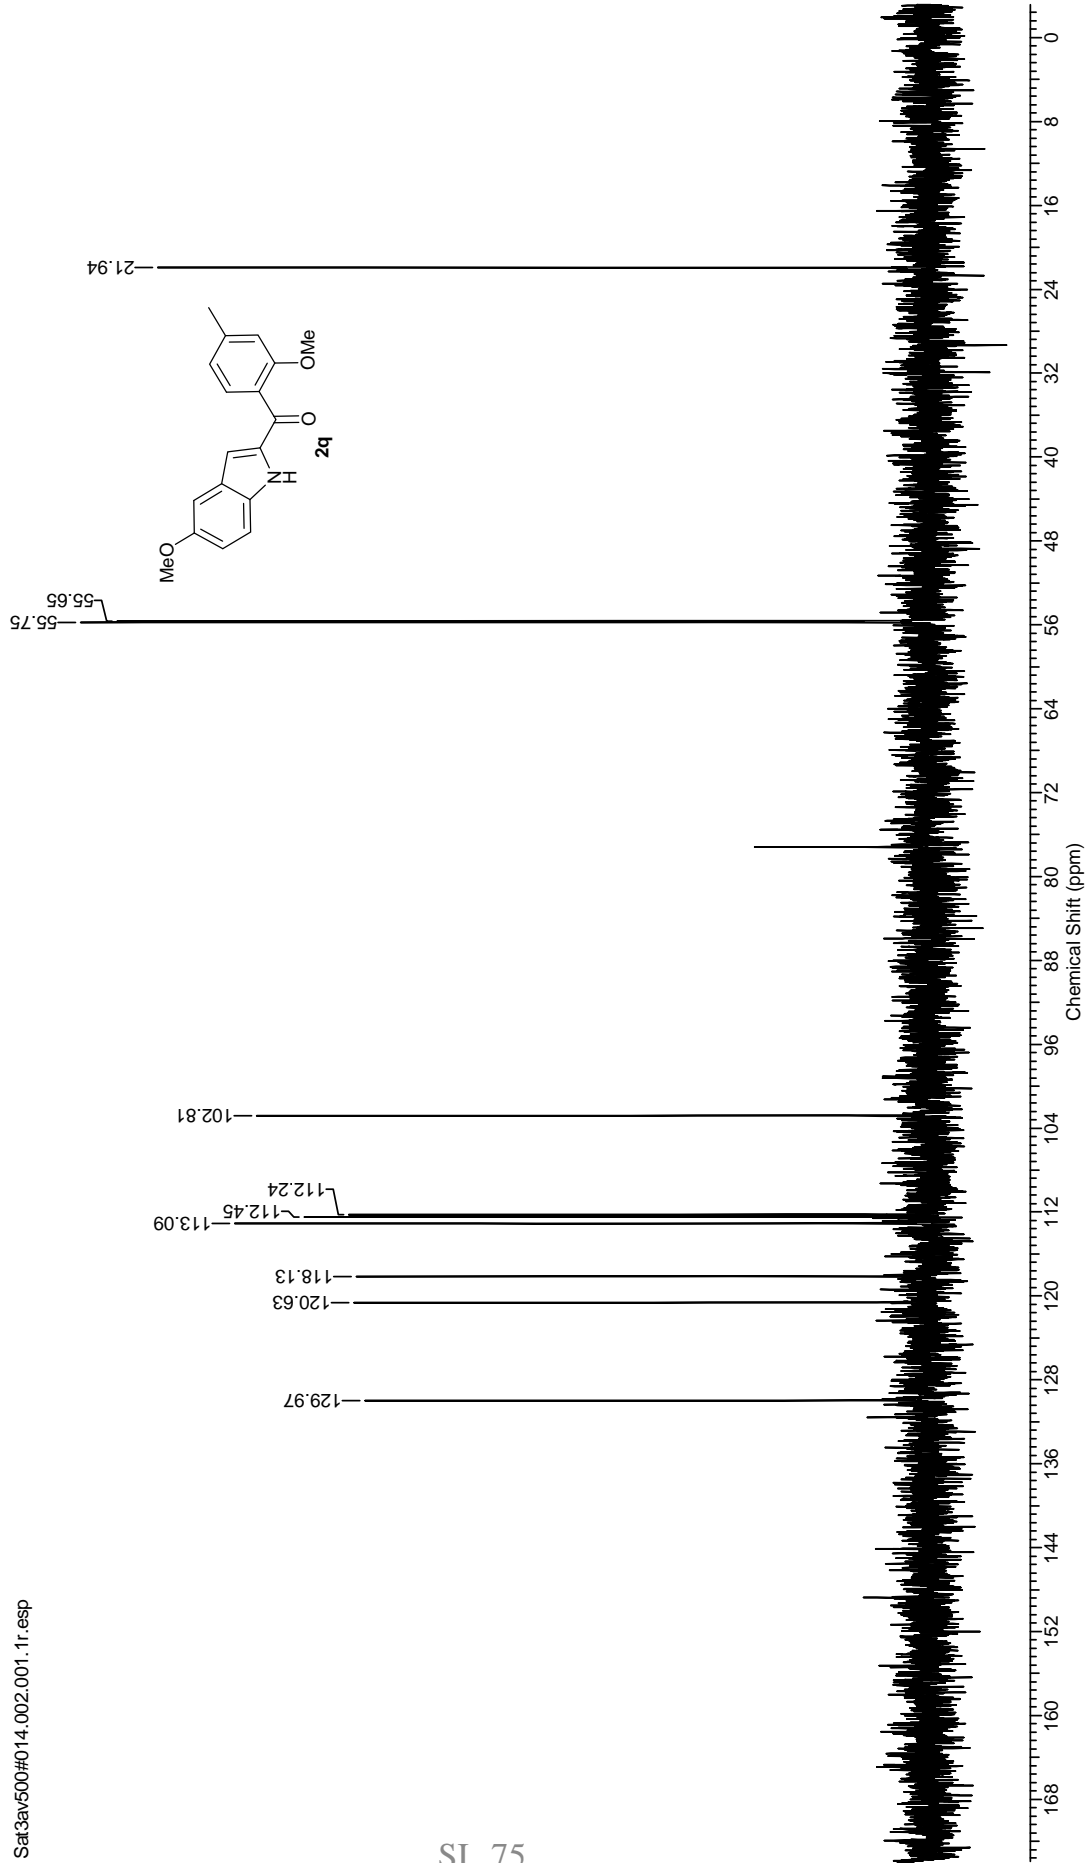

D:\Data\YM-954

9/13/2013 11:18:53 AM

YM-954 #997 RT: 4.44 AV: 1 NL: 1.05E9  
T: FTMS + p ESI Full ms [100.00-700.00]

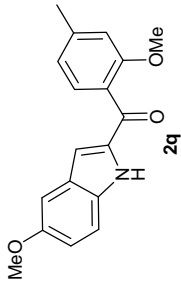

318.1101  
R=62307  
C<sub>18</sub>H<sub>17</sub>O<sub>3</sub>N Na = 318.1101  
0.0386 ppm

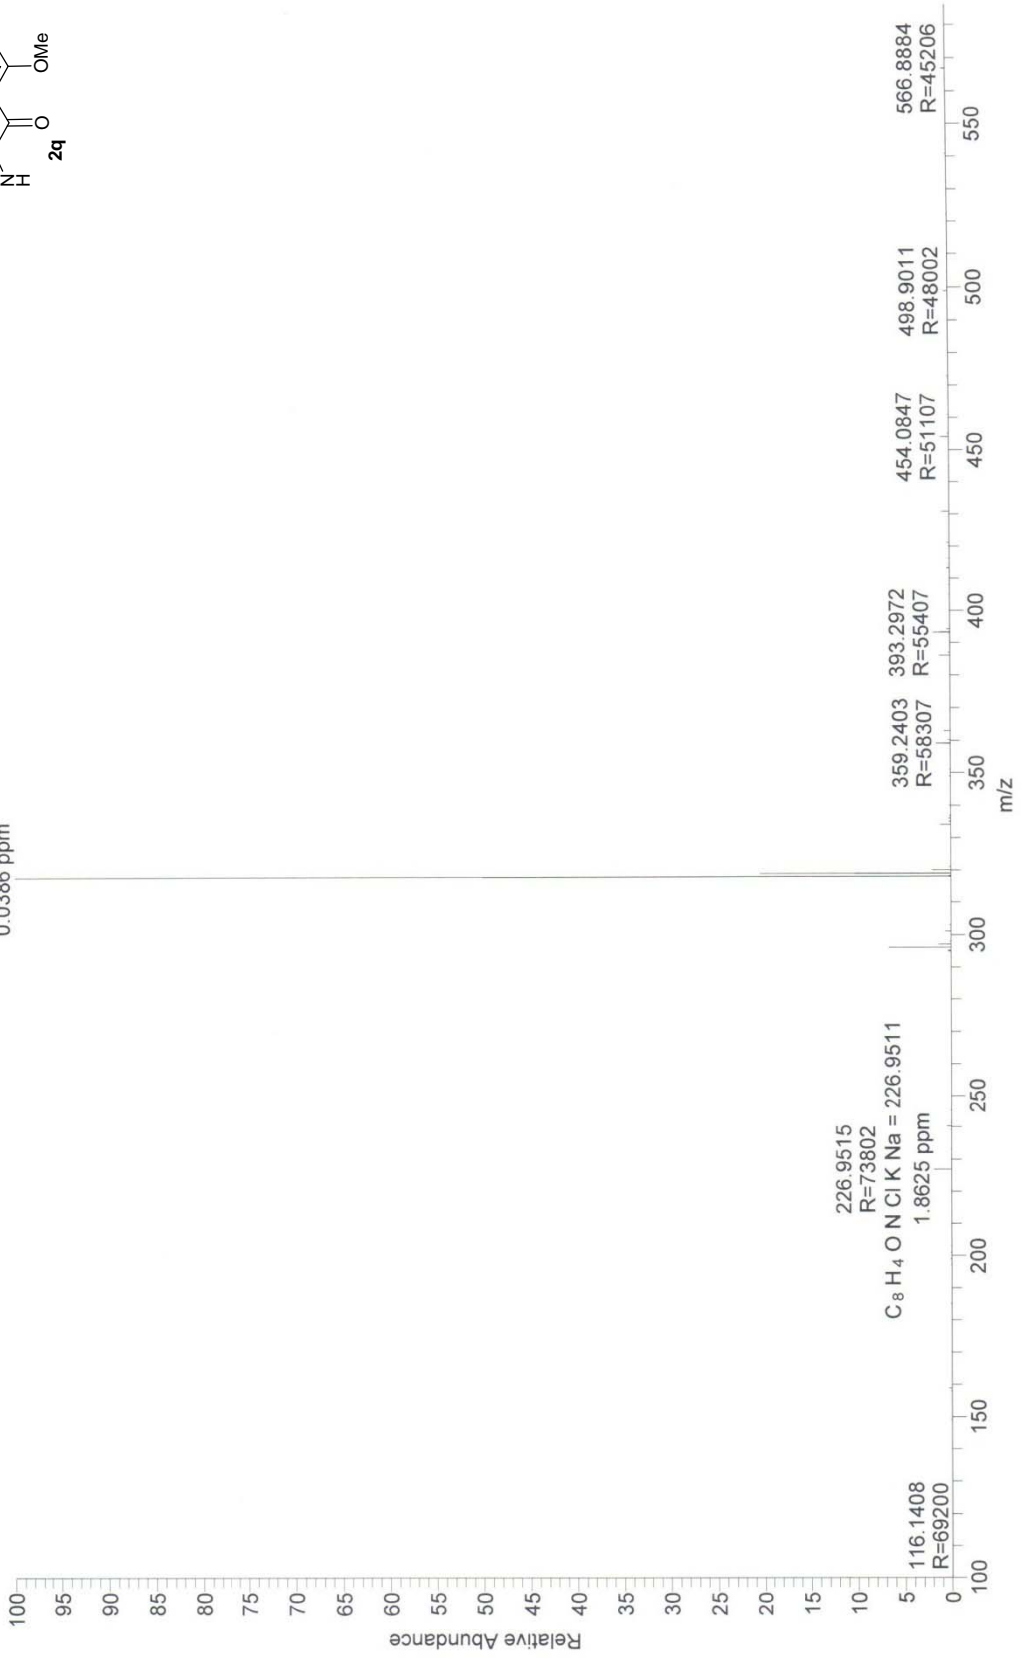



|                               |                                          |                              |          |                               |                      |                             |                      |
|-------------------------------|------------------------------------------|------------------------------|----------|-------------------------------|----------------------|-----------------------------|----------------------|
| <b>Acquisition Time (sec)</b> | 1.0486                                   | <b>Comment</b>               | 13C      | <b>Date</b>                   | 02 Aug 2013 14:52:16 | <b>Date Stamp</b>           | 02 Aug 2013 14:52:16 |
| <b>File Name</b>              | H:\New folder\Fri1av500#007\3\PDATA\1\1r | <b>Original Points Count</b> | 32768    | <b>Frequency (MHz)</b>        | 125.76               | <b>Nucleus</b>              | 13C                  |
| <b>Origin</b>                 | spect                                    | <b>SW(cyclical) (Hz)</b>     | 31250.00 | <b>Owner</b>                  | nmr                  | <b>Points Count</b>         | 32768                |
| <b>Receiver Gain</b>          | 575.00                                   | <b>Sweep Width (Hz)</b>      | 31249.05 | <b>Solvent</b>                | CHLOROFORM-d         | <b>Spectrum Offset (Hz)</b> | 11983.1357           |
| <b>Spectrum Type</b>          | STANDARD                                 |                              |          | <b>Temperature (degree C)</b> | 23.000               |                             |                      |

Fri1av500#007.003.001.1r.esp

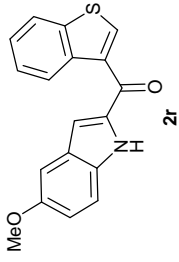

CHLOROFORM-d

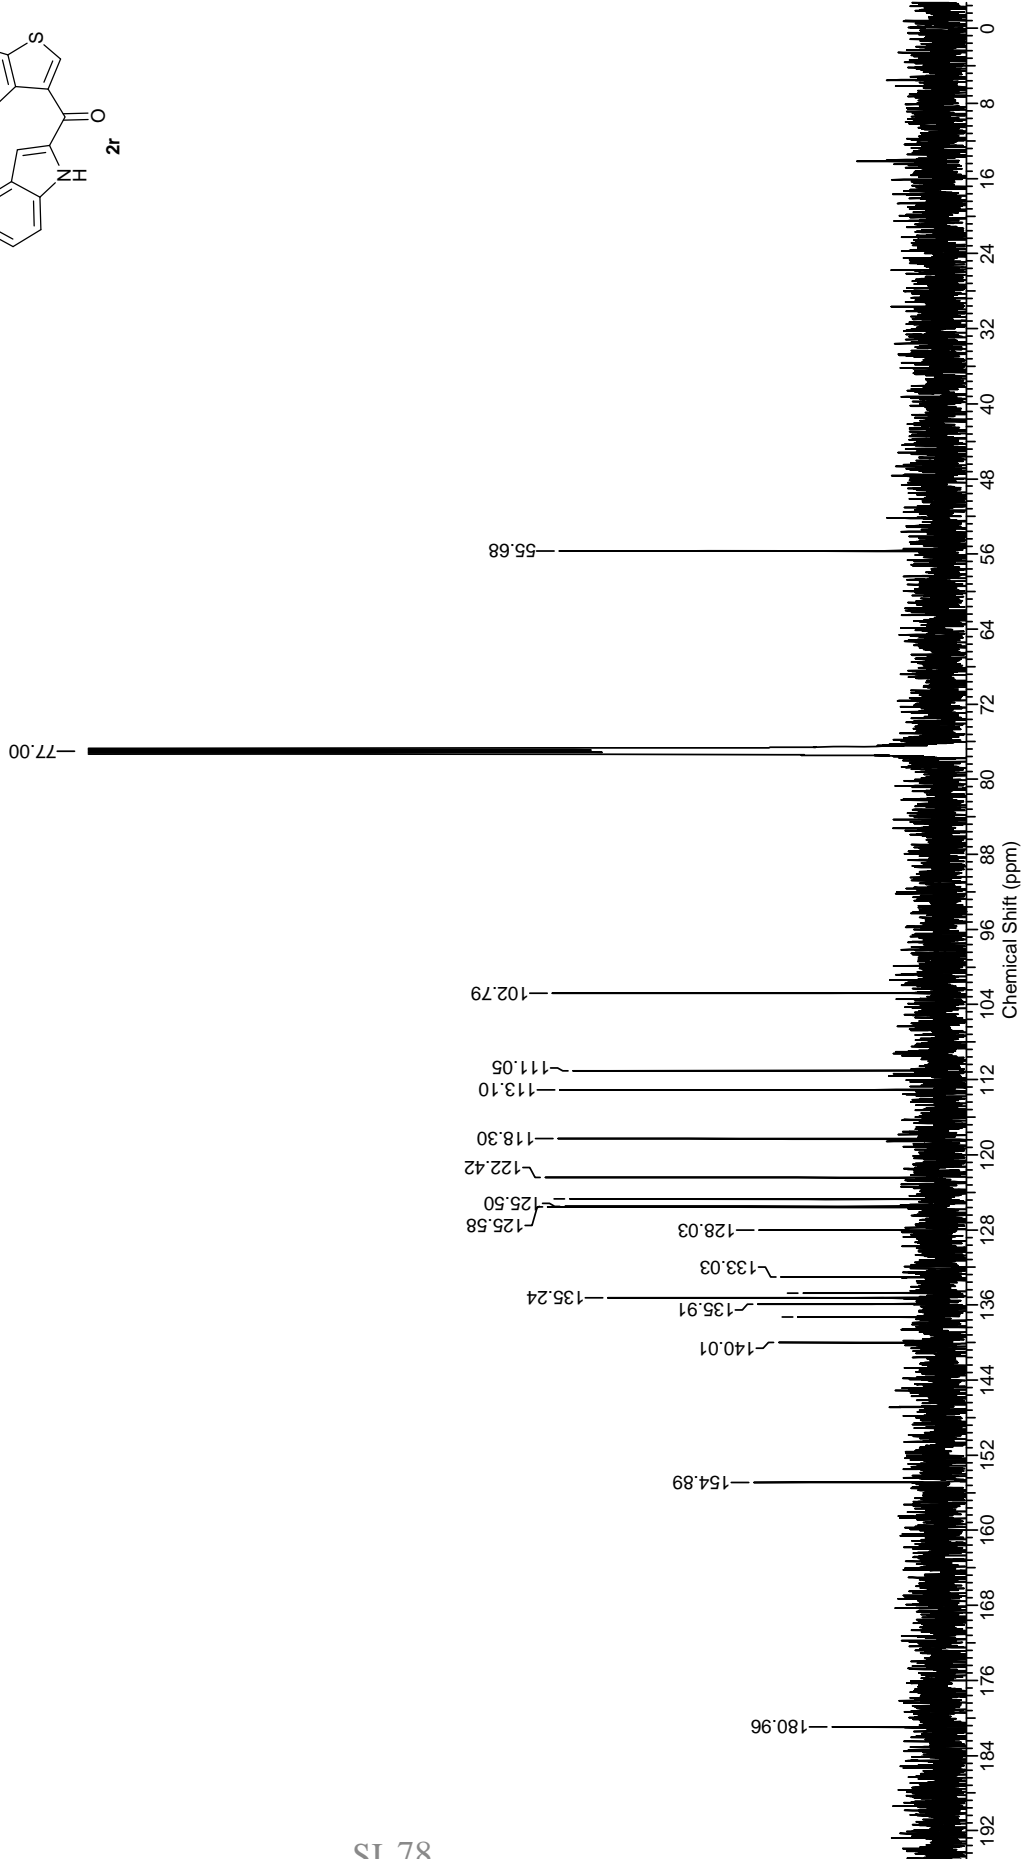

|                               |                                           |                              |          |                               |                      |                             |                      |
|-------------------------------|-------------------------------------------|------------------------------|----------|-------------------------------|----------------------|-----------------------------|----------------------|
| <b>Acquisition Time (sec)</b> | 1.1010                                    | <b>Comment</b>               | DEPT;    | <b>Date</b>                   | 02 Aug 2013 14:35:12 | <b>Date Stamp</b>           | 02 Aug 2013 14:35:12 |
| <b>File Name</b>              | H:\New folder\Fri11av500#007\2\PDATA\1\1r | <b>Original Points Count</b> | 32768    | <b>Frequency (MHz)</b>        | 125.76               | <b>Number of Transients</b> | 800                  |
| <b>Origin</b>                 | spect                                     | <b>SW(cyclical) (Hz)</b>     | 29761.90 | <b>Owner</b>                  | nmr                  | <b>Pulse Sequence</b>       | dept135              |
| <b>Receiver Gain</b>          | 2050.00                                   | <b>Sweep Width (Hz)</b>      | 29761.00 | <b>Solvent</b>                | CHLOROFORM-d         | <b>Spectrum Offset (Hz)</b> | 12572.1055           |
| <b>Spectrum Type</b>          | DEPT135                                   |                              |          | <b>Temperature (degree C)</b> | 22.600               |                             |                      |

Fri11av500#007.002.001.1r.esp

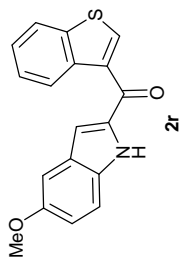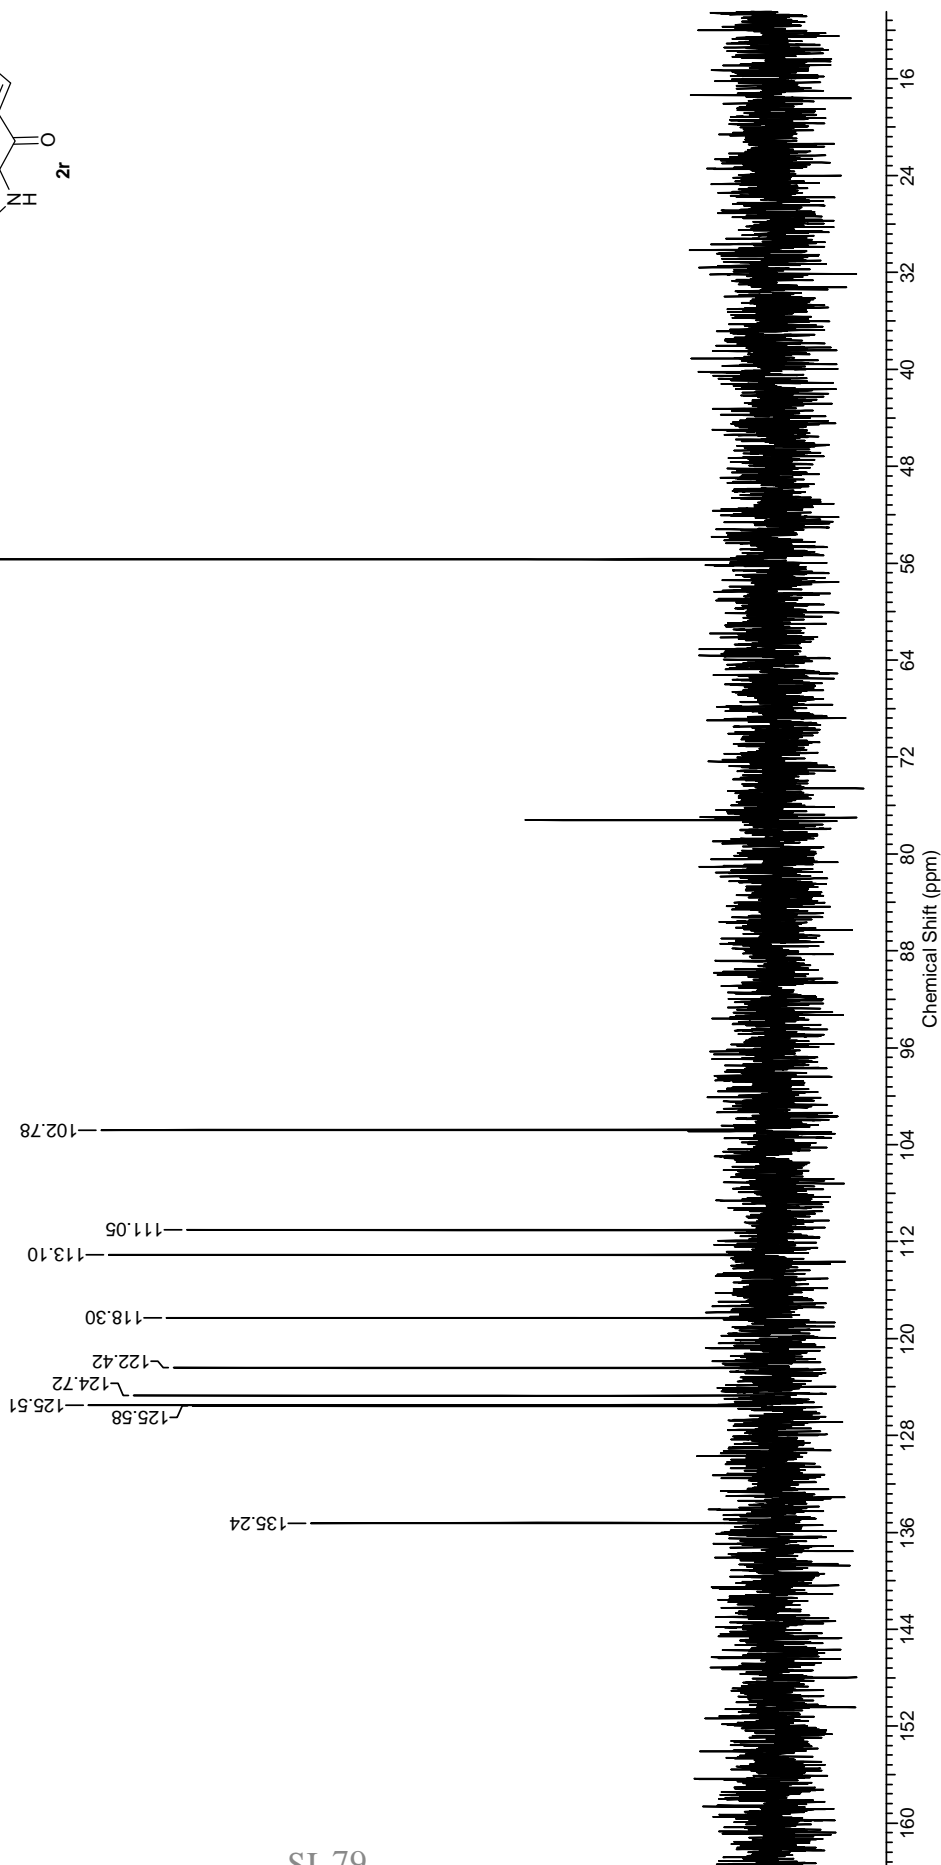

D:\Data\YM-961

9/16/2013 11:50:39 AM

YM-961 #1053 RT: 4.69 AV: 1 NL: 1.90E8  
T: FTMS + p ESI Full ms [100.00-700.00]

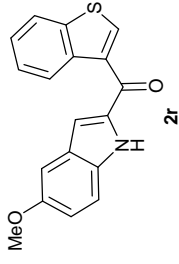

308.0741  
R=64107  
C<sub>18</sub> H<sub>14</sub> O<sub>2</sub> N S = 308.0740  
0.2929 ppm

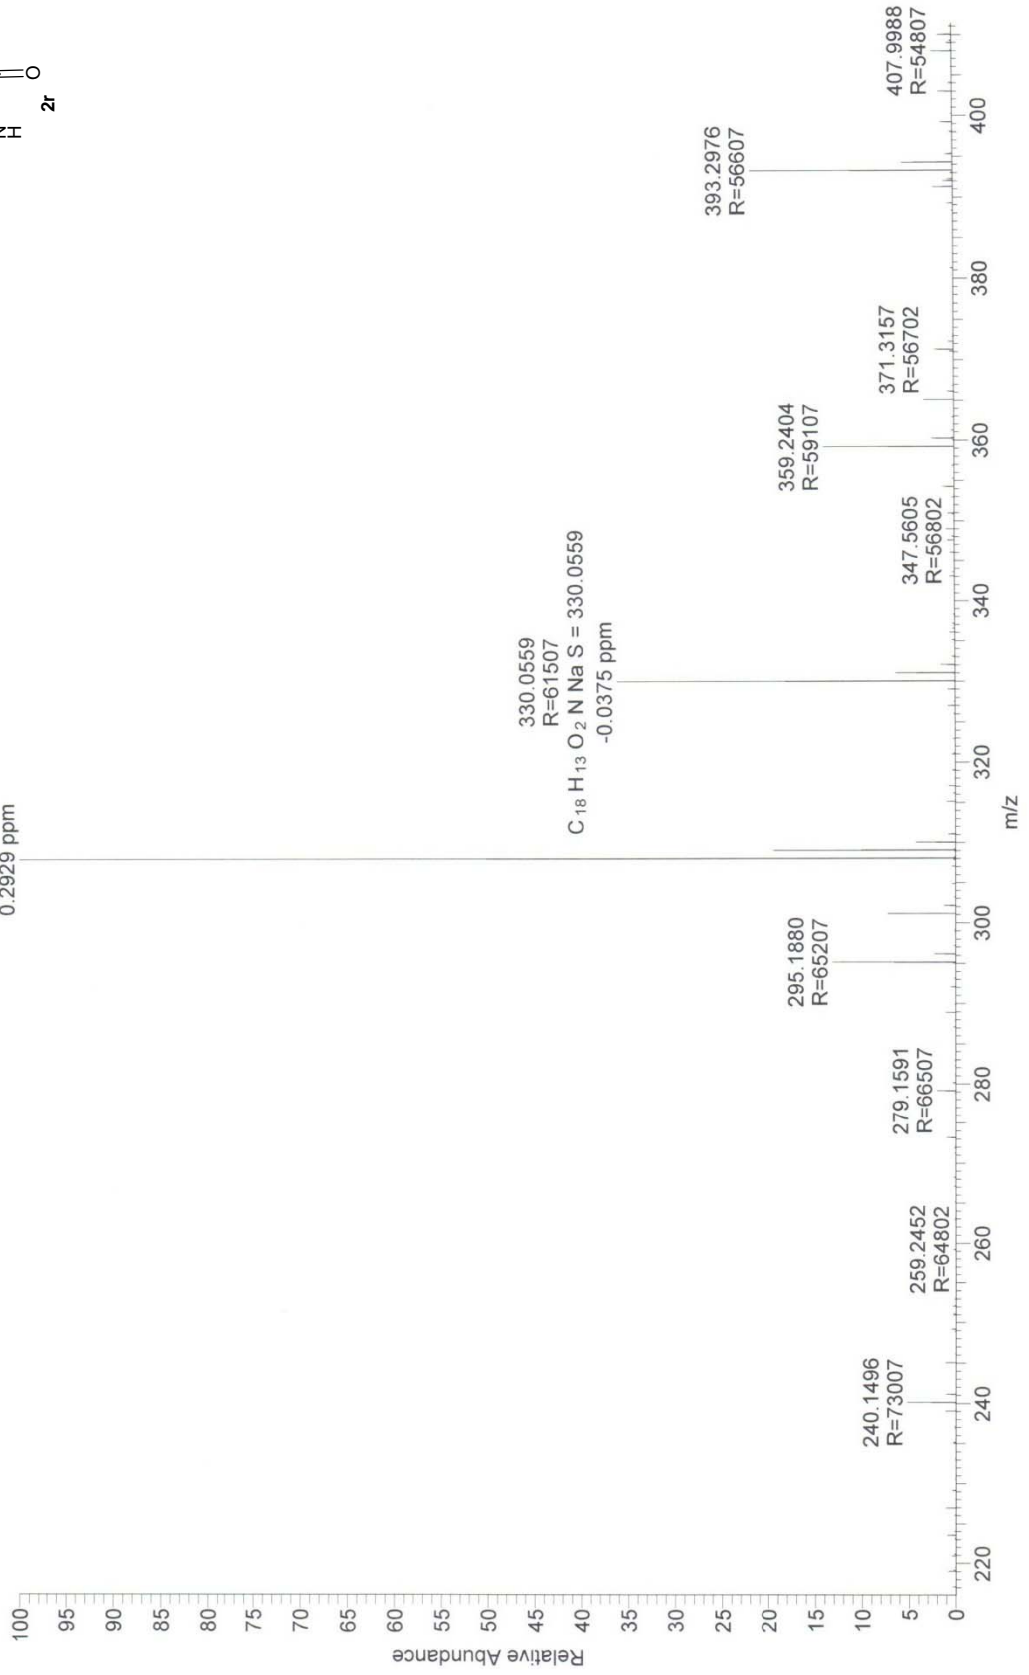



|                               |                      |                             |                                                             |                              |                      |
|-------------------------------|----------------------|-----------------------------|-------------------------------------------------------------|------------------------------|----------------------|
| <b>Acquisition Time (sec)</b> | 2.0031               | <b>Comment</b>              | Yogesh 1H                                                   | <b>Date</b>                  | 08 Sep 2013 12:05:52 |
| <b>Date Stamp</b>             | 08 Sep 2013 12:05:52 | <b>File Name</b>            | \lagni\nmr_data\AV_500\Sep_13_500\Sun2av500#0011\IPDATA\11r |                              |                      |
| <b>Frequency (MHz)</b>        | 500.13               | <b>Nucleus</b>              | 1H                                                          | <b>Origin</b>                | spect                |
| <b>Owner</b>                  | nmr                  | <b>Points Count</b>         | 32768                                                       | <b>Receiver Gain</b>         | 362.00               |
| <b>Solvent</b>                | CHLOROFORM-d         | <b>Spectrum Offset (Hz)</b> | 2209.7742                                                   | <b>Spectrum Type</b>         | STANDARD             |
| <b>Temperature (degree C)</b> | 24.800               | <b>Number of Transients</b> | 64                                                          | <b>Original Points Count</b> | 20031                |
|                               |                      | <b>Pulse Sequence</b>       | zg30                                                        | <b>SW(cyclical) (Hz)</b>     | 10000.00             |
|                               |                      | <b>Spectrum Width (Hz)</b>  |                                                             | <b>Sweep Width (Hz)</b>      | 9999.70              |

Sun2av500#001.001.001.1r.esp

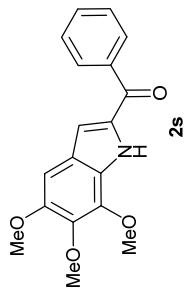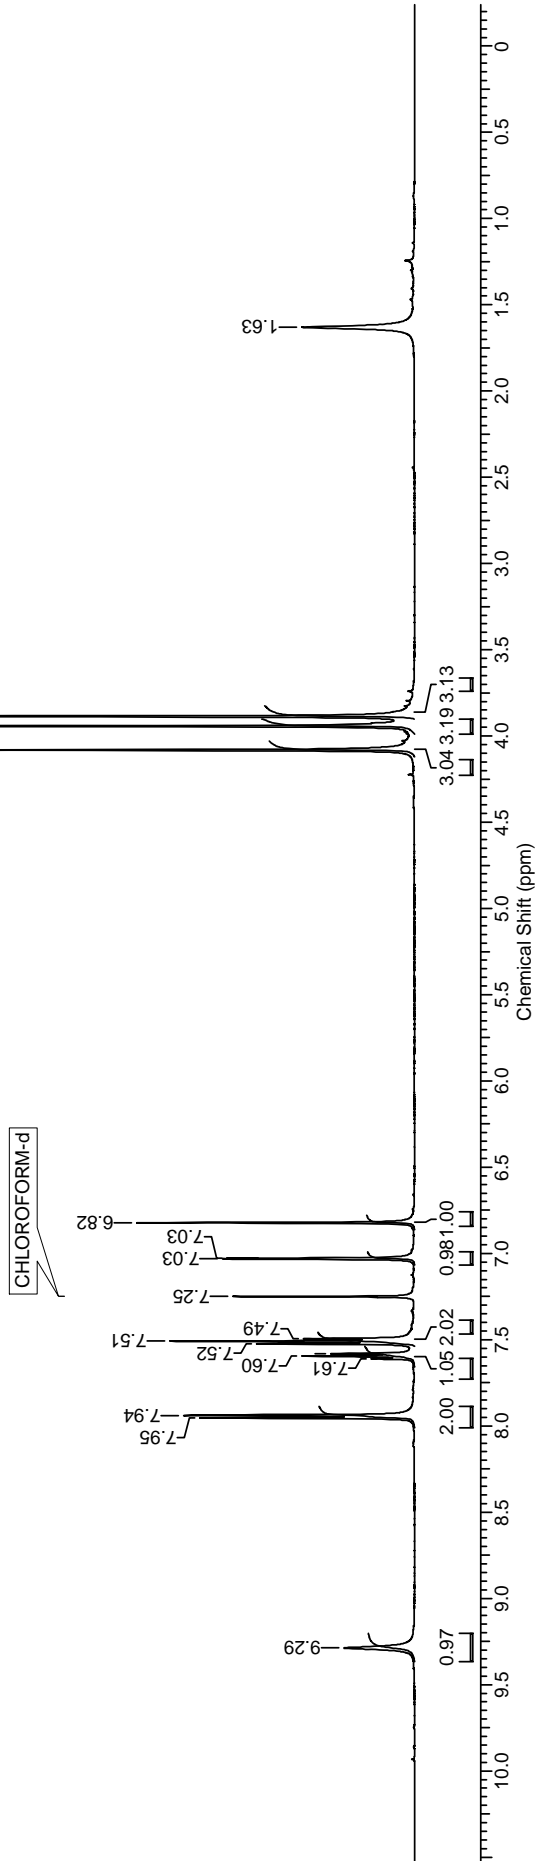

|                               |                      |                     |              |                              |                                                              |
|-------------------------------|----------------------|---------------------|--------------|------------------------------|--------------------------------------------------------------|
| <b>Acquisition Time (sec)</b> | 1.0486               | <b>Comment</b>      | 13C          | <b>Date</b>                  | 08 Sep 2013 13:50:24                                         |
| <b>Date Stamp</b>             | 08 Sep 2013 13:50:24 | <b>Nucleus</b>      | 13C          | <b>File Name</b>             | \\agn1\nmr_data\AV_500\Sep_13_500\Sun2av500#001\3\PDATA\1\1r |
| <b>Frequency (MHz)</b>        | 125.76               | <b>Points Count</b> | 32768        | <b>Number of Transients</b>  | 1862                                                         |
| <b>Owner</b>                  | nmr                  | <b>Solvent</b>      | CHLOROFORM-d | <b>Pulse Sequence</b>        | zgpg30                                                       |
| <b>Temperature (degree C)</b> | 25.700               |                     |              | <b>Spectrum Offset (Hz)</b>  | 11982.1826                                                   |
|                               |                      |                     |              | <b>Receiver Gain</b>         | 575.00                                                       |
|                               |                      |                     |              | <b>Spectrum Type</b>         | STANDARD                                                     |
|                               |                      |                     |              | <b>Original Points Count</b> | 32768                                                        |
|                               |                      |                     |              | <b>SW(cyclical) (Hz)</b>     | 31250.00                                                     |
|                               |                      |                     |              | <b>Sweep Width (Hz)</b>      | 31249.05                                                     |

Sun2av500#001.003.001.1r.esp

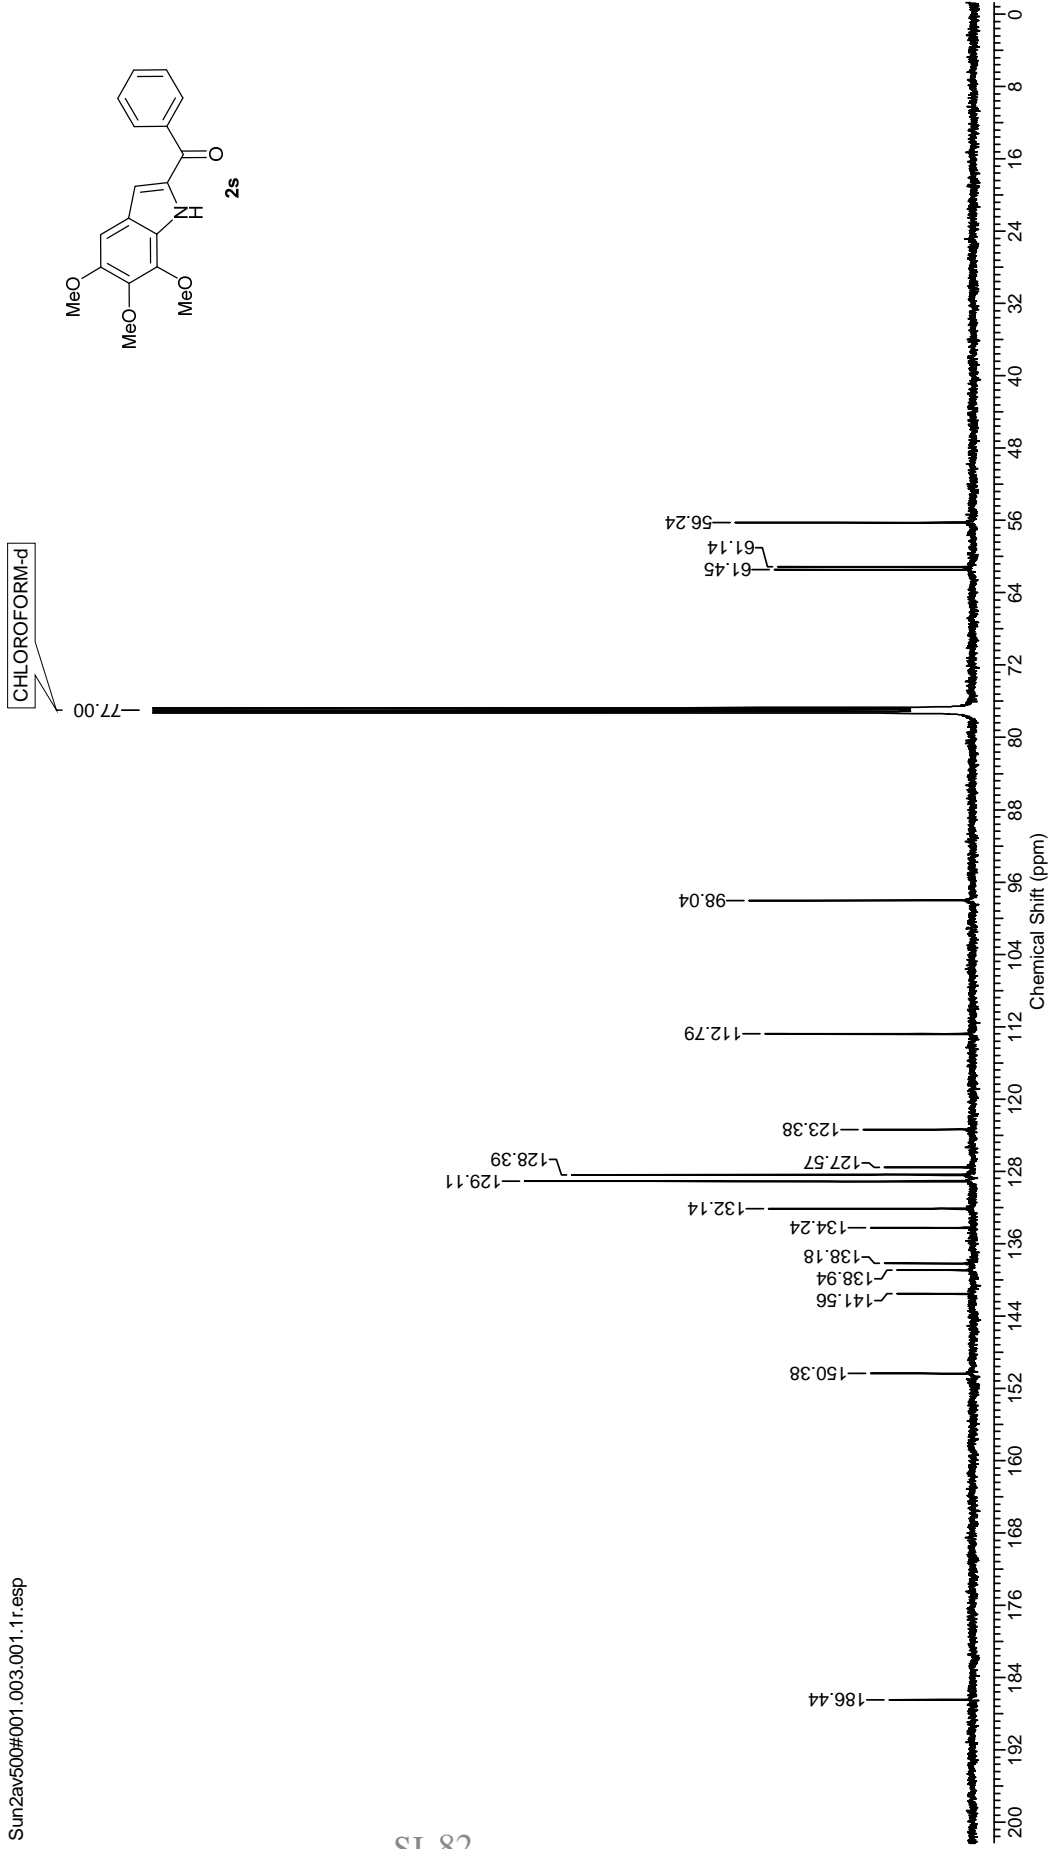

|                               |                      |                     |       |                              |                                                     |
|-------------------------------|----------------------|---------------------|-------|------------------------------|-----------------------------------------------------|
| <b>Acquisition Time (sec)</b> | 1.1010               | <b>Comment</b>      | DEPT; | <b>Date</b>                  | 08 Sep 2013 12:12:16                                |
| <b>Date Stamp</b>             | 08 Sep 2013 12:12:16 | <b>Nucleus</b>      | 13C   | <b>File Name</b>             | \\agnit\nmr_data\AV_500\Sun2av500#001\2\IPDATA\1\1r |
| <b>Frequency (MHz)</b>        | 125.76               | <b>Points Count</b> | 32768 | <b>Number of Transients</b>  | 183                                                 |
| <b>Owner</b>                  | nmr                  |                     |       | <b>Pulse Sequence</b>        | dept135                                             |
| <b>Solvent</b>                | CHLOROFORM-d         |                     |       | <b>Receiver Gain</b>         | 2050.00                                             |
| <b>Temperature (degree C)</b> | 25.100               |                     |       | <b>Spectrum Offset (Hz)</b>  | 12572.5947                                          |
|                               |                      |                     |       | <b>Spectrum Type</b>         | DEPT135                                             |
|                               |                      |                     |       | <b>Original Points Count</b> | 32768                                               |
|                               |                      |                     |       | <b>SW(cyclical) (Hz)</b>     | 29761.90                                            |
|                               |                      |                     |       | <b>Sweep Width (Hz)</b>      | 29761.00                                            |

Sun2av500#001.002.001.1r.esp

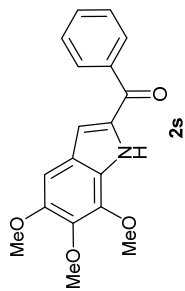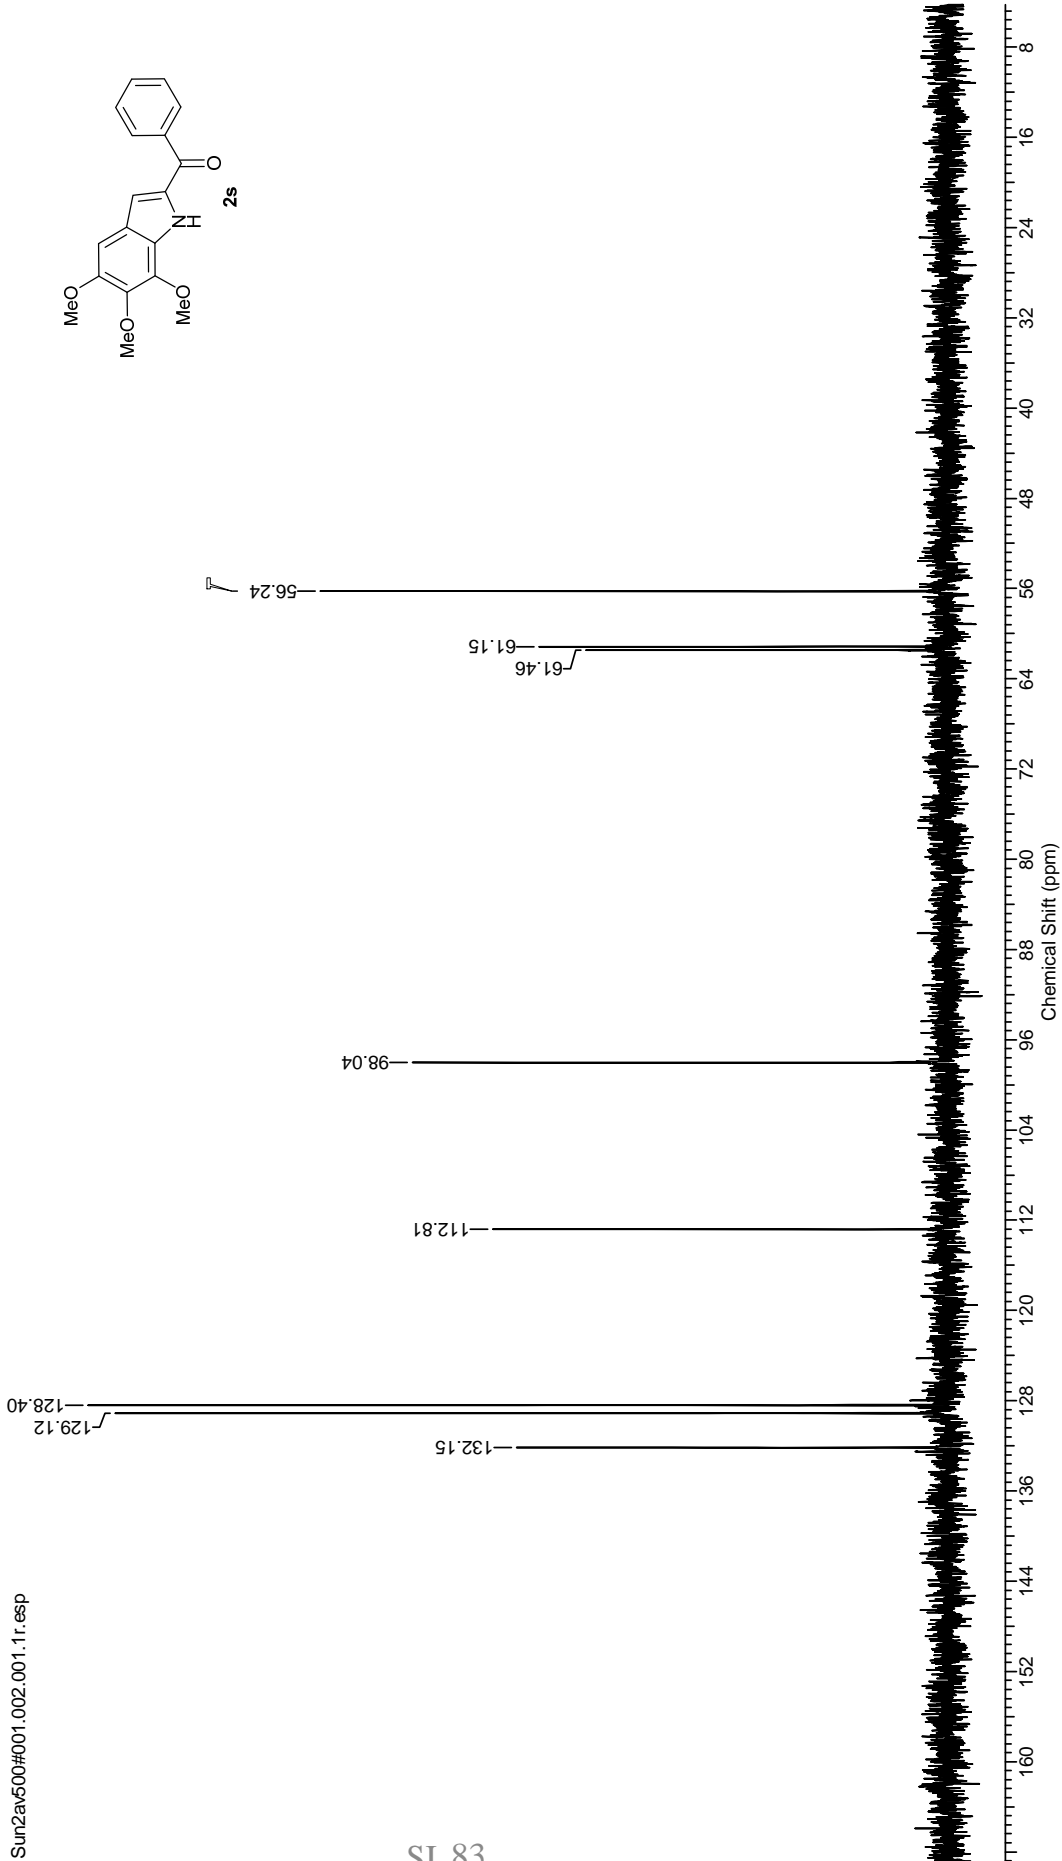

|                               |                      |                             |                                                          |                              |                      |
|-------------------------------|----------------------|-----------------------------|----------------------------------------------------------|------------------------------|----------------------|
| <b>Acquisition Time (sec)</b> | 1.9923               | <b>Comment</b>              | Yogesh 1H                                                | <b>Date</b>                  | 15 Aug 2013 17:31:52 |
| <b>Date Stamp</b>             | 15 Aug 2013 17:31:52 | <b>File Name</b>            | \agn\nmr_data\AV400\Aug_13_400\Thu3av400#004\1\PDATA\11r |                              |                      |
| <b>Frequency (MHz)</b>        | 400.13               | <b>Nucleus</b>              | 1H                                                       | <b>Origin</b>                | spect                |
| <b>Owner</b>                  | Administrator        | <b>Points Count</b>         | 32768                                                    | <b>Receiver Gain</b>         | 256.00               |
| <b>Solvent</b>                | CHLOROFORM-d         | <b>Spectrum Offset (Hz)</b> | 2456.8564                                                | <b>Spectrum Type</b>         | STANDARD             |
| <b>Temperature (degree C)</b> | 22.200               | <b>Number of Transients</b> | 64                                                       | <b>Original Points Count</b> | 16384                |
|                               |                      | <b>Pulse Sequence</b>       | zg30                                                     | <b>SW(cyclical) (Hz)</b>     | 8223.68              |
|                               |                      |                             |                                                          | <b>Sweep Width (Hz)</b>      | 8223.43              |

Thu3av400#004\001\001.1r.esp

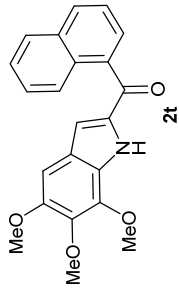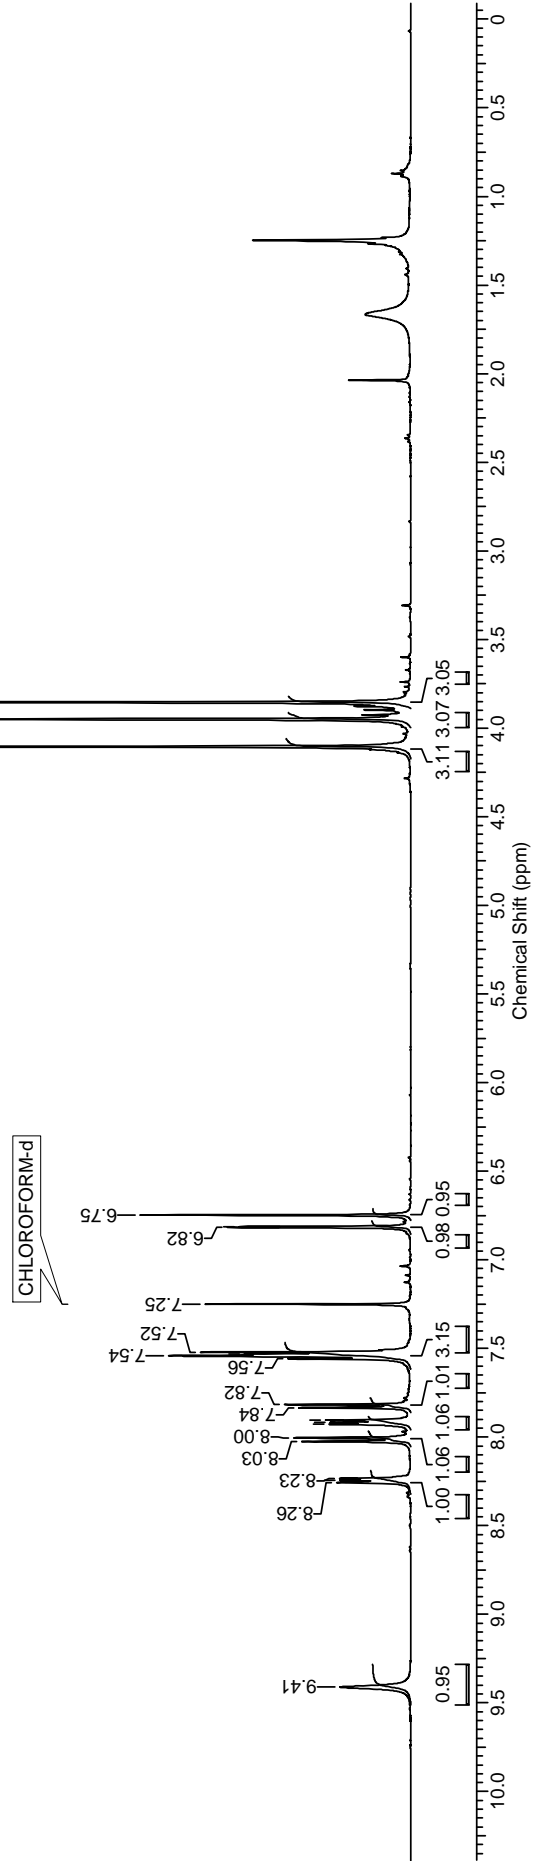

|                        |                      |                      |                                                          |                       |                      |
|------------------------|----------------------|----------------------|----------------------------------------------------------|-----------------------|----------------------|
| Acquisition Time (sec) | 0.6488               | Comment              | 13C                                                      | Date                  | 15 Aug 2013 21:20:08 |
| Date Stamp             | 15 Aug 2013 21:20:08 | File Name            | \agn\nmr_data\AV400\Aug_13_400\Thu3av400#004\3\PDATA111r |                       |                      |
| Frequency (MHz)        | 100.61               | Nucleus              | 13C                                                      | Number of Transients  | 4000                 |
| Owner                  | root                 | Points Count         | 32768                                                    | Pulse Sequence        | zpgq30               |
| Solvent                | CHLOROFORM-d         | Spectrum Offset (Hz) | 9553.9619                                                | Receiver Gain         | 2050.00              |
| Temperature (degree C) | 22.300               | Spectrum Type        | STANDARD                                                 | Original Points Count | 16384                |
|                        |                      |                      |                                                          | SW(cyclical) (Hz)     | 25252.53             |
|                        |                      |                      |                                                          | Sweep Width (Hz)      | 25251.75             |

Thu3av400#004.003.001.1r.esp

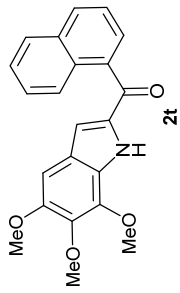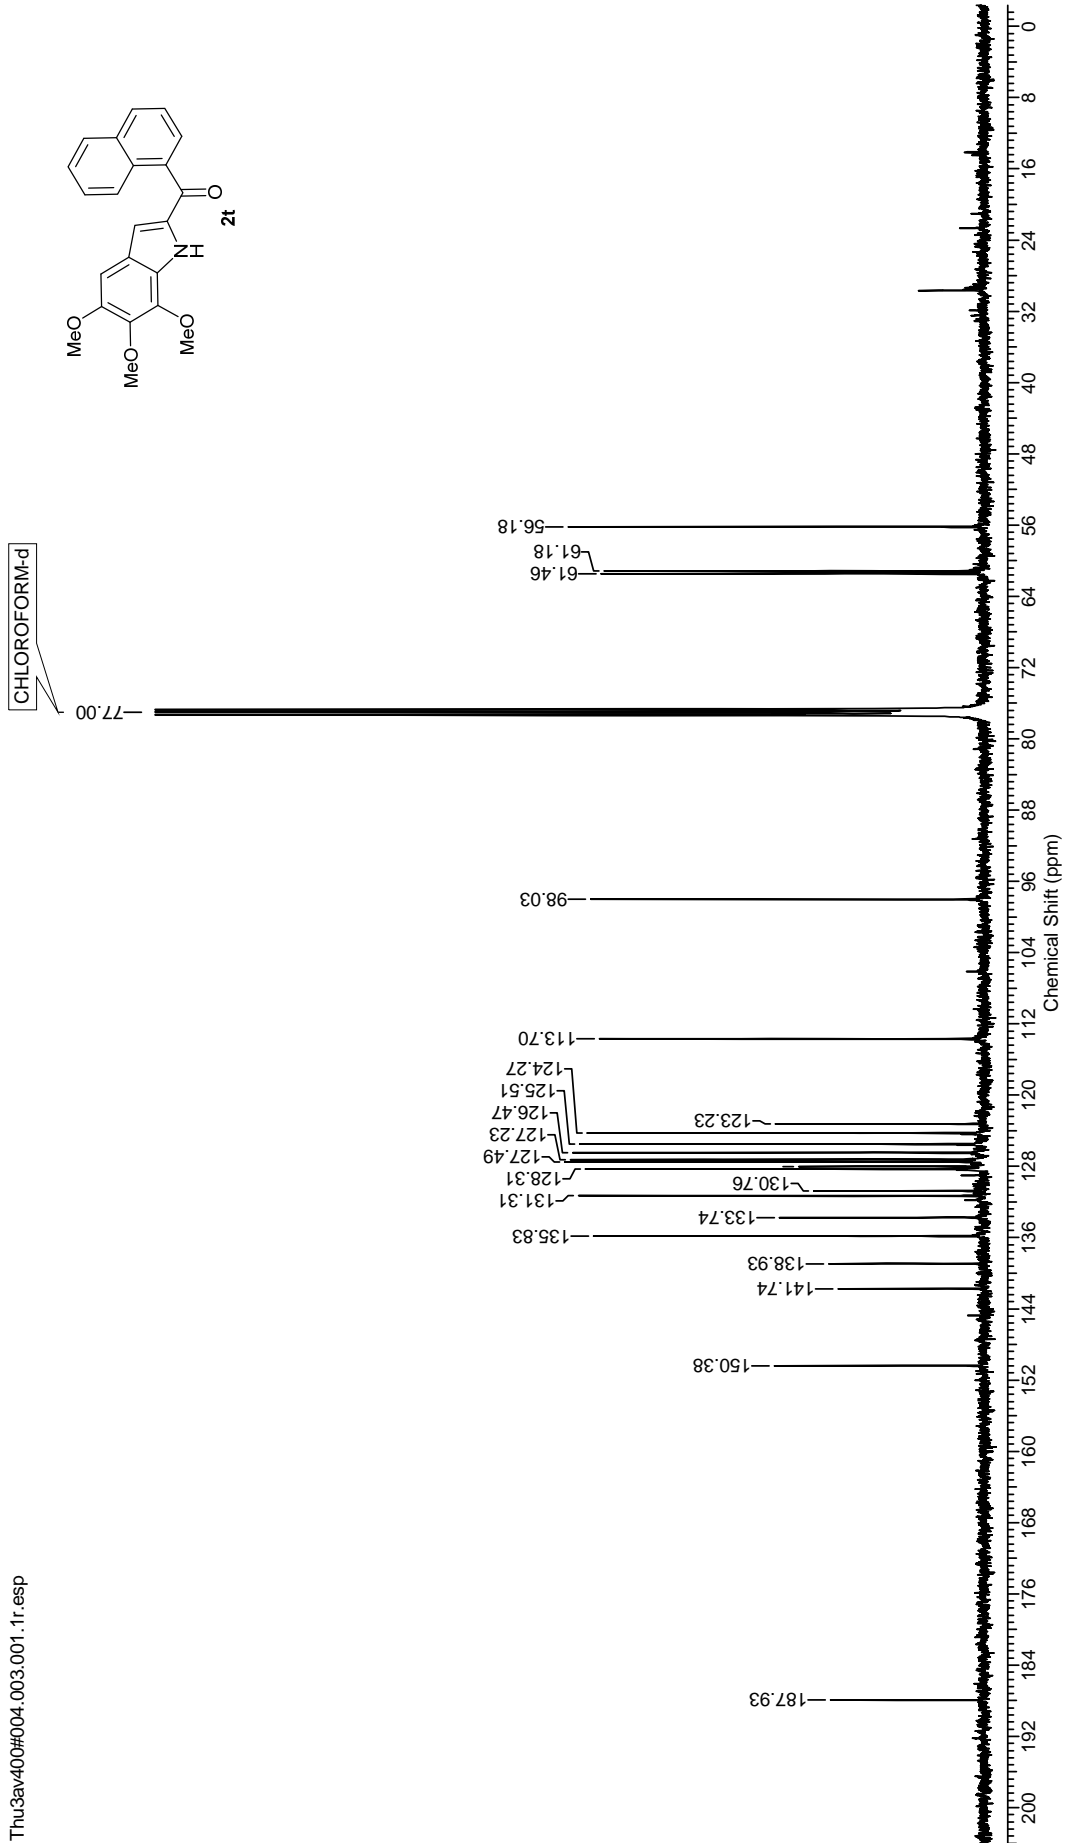

|                        |                      |                      |                                                             |                       |                      |
|------------------------|----------------------|----------------------|-------------------------------------------------------------|-----------------------|----------------------|
| Acquisition Time (sec) | 0.6488               | Comment              | DEPT                                                        | Date                  | 15 Aug 2013 18:18:48 |
| Date Stamp             | 15 Aug 2013 18:18:48 | File Name            | \\lagn\hmr_data\AV400\Aug_13_400\Thu3av400#004\2\PDATA\1\1r | Origin                | spect                |
| Frequency (MHz)        | 100.61               | Nucleus              | 13C                                                         | Number of Transients  | 1000                 |
| Owner                  | root                 | Points Count         | 32768                                                       | Pulse Sequence        | dept135              |
| Solvent                | CHLOROFORM-d         | Spectrum Offset (Hz) | 10055.5107                                                  | Receiver Gain         | 16384.00             |
| Temperature (degree C) | 22.300               | Spectrum Type        | DEPT135                                                     | Original Points Count | 16384                |
|                        |                      |                      |                                                             | SW(cyclical) (Hz)     | 25252.53             |
|                        |                      |                      |                                                             | Sweep Width (Hz)      | 25251.75             |

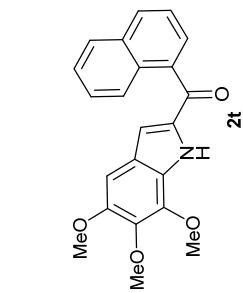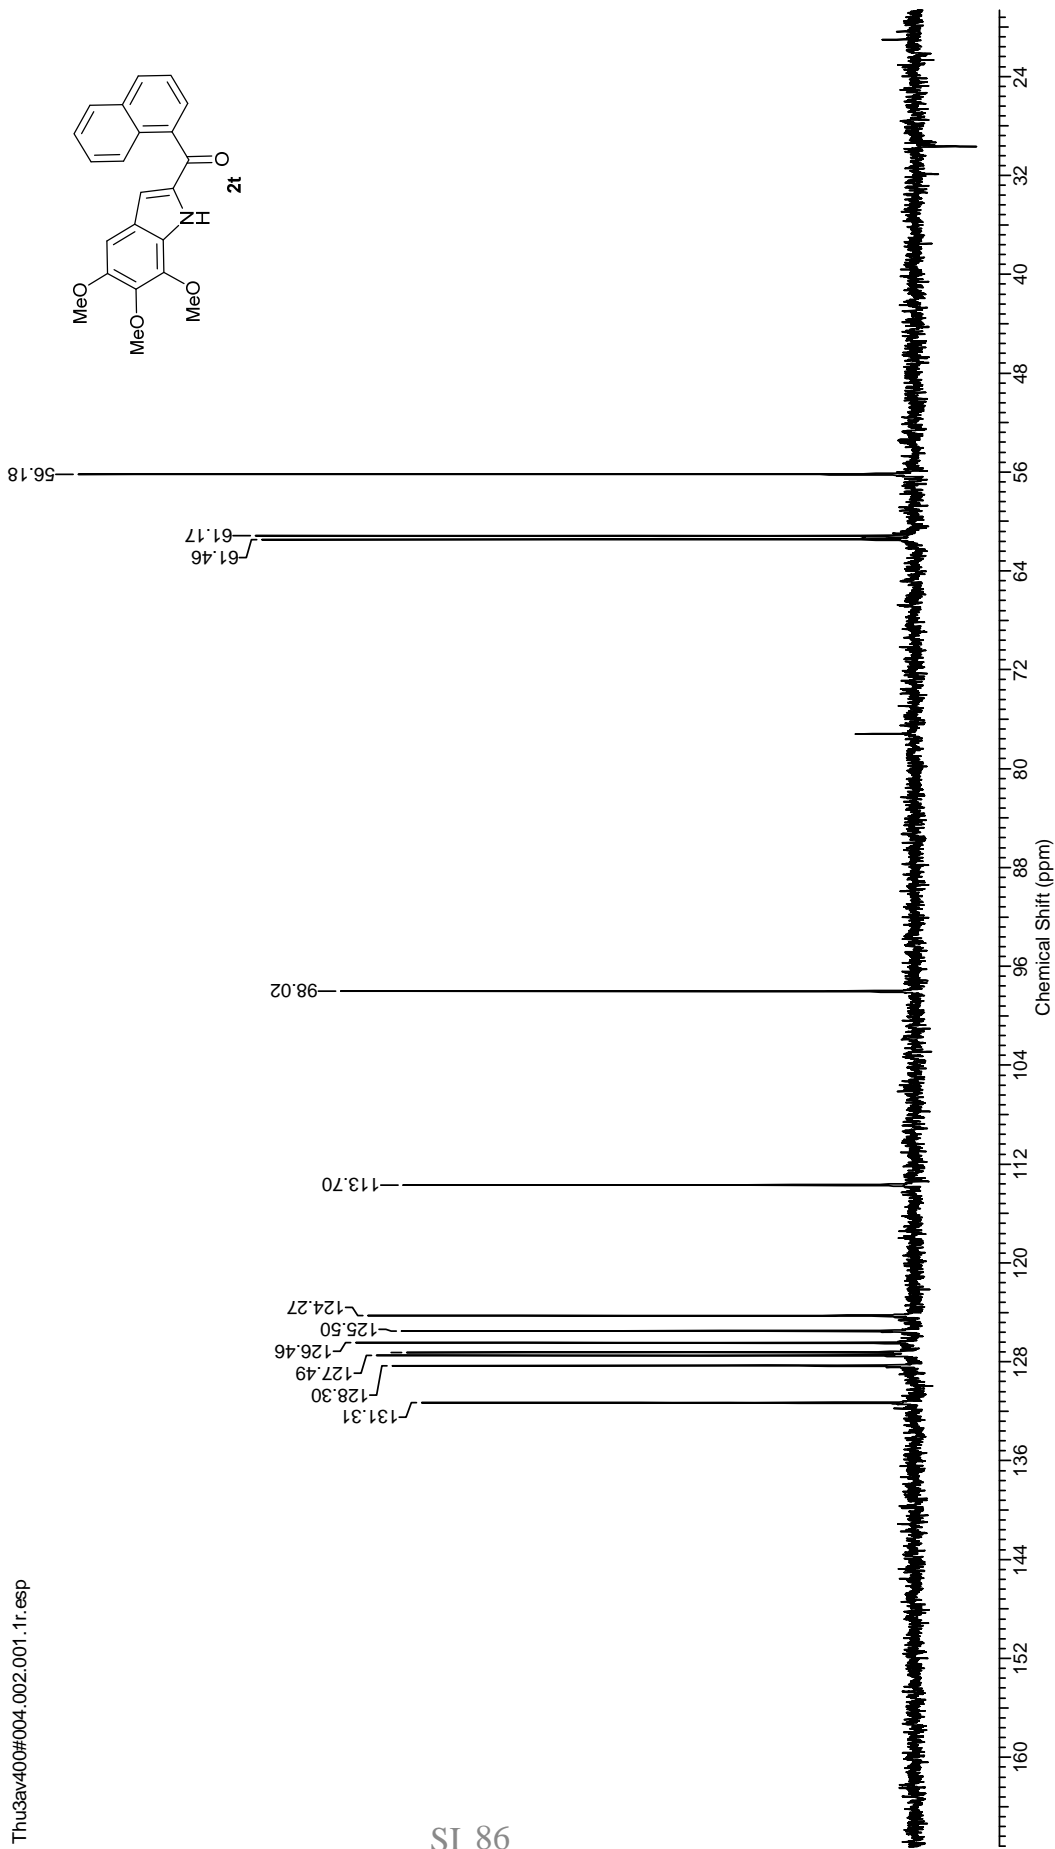

D:\Data\YM-977

9/16/2013 12:24:11 PM

YM-977 #1048 RT: 4.67 AV: 1 NL: 1.36E9  
T: FTMS + p ESI Full ms [100.00-700.00]

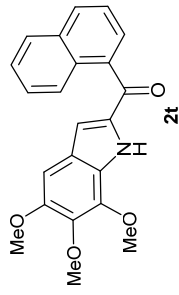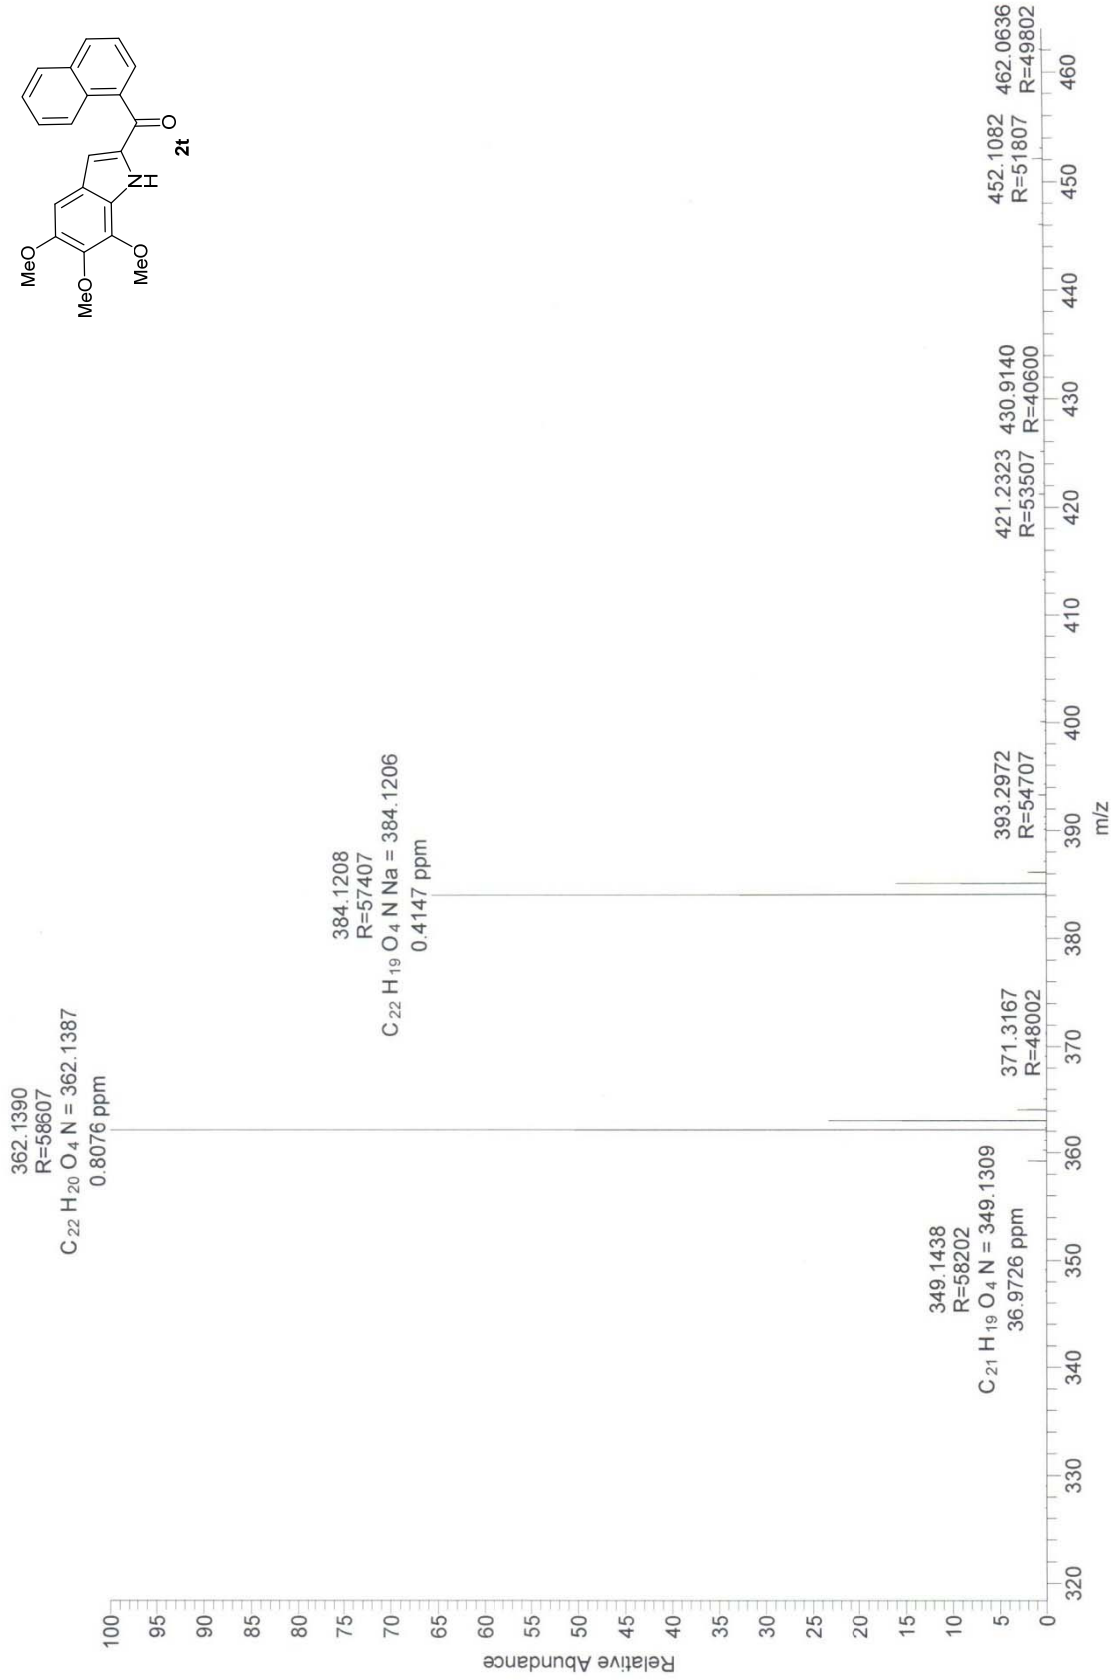

|                               |                      |                             |                                                              |                              |                      |
|-------------------------------|----------------------|-----------------------------|--------------------------------------------------------------|------------------------------|----------------------|
| <b>Acquisition Time (sec)</b> | 2.0031               | <b>Comment</b>              | yogesh 1H                                                    | <b>Date</b>                  | 30 Aug 2013 11:12:32 |
| <b>Date Stamp</b>             | 30 Aug 2013 11:12:32 | <b>File Name</b>            | \\lagn\hmr_data\AV_500\Aug_13_500\Fri5av500#0041\IPDATA\1\1r |                              |                      |
| <b>Frequency (MHz)</b>        | 500.13               | <b>Nucleus</b>              | 1H                                                           | <b>Number of Transients</b>  | 64                   |
| <b>Owner</b>                  | nmr                  | <b>Points Count</b>         | 32768                                                        | <b>Pulse Sequence</b>        | zg30                 |
| <b>Solvent</b>                | CHLOROFORM-d         | <b>Spectrum Offset (Hz)</b> | 2219.7769                                                    | <b>Receiver Gain</b>         | 322.00               |
| <b>Temperature (degree C)</b> | 22.100               | <b>Spectrum Type</b>        | STANDARD                                                     | <b>Original Points Count</b> | 20031                |
|                               |                      |                             |                                                              | <b>SW(cyclical) (Hz)</b>     | 10000.00             |
|                               |                      |                             |                                                              | <b>Sweep Width (Hz)</b>      | 9999.70              |

Fri5av500#004.001.001.1r.esp

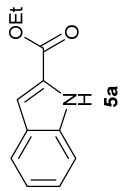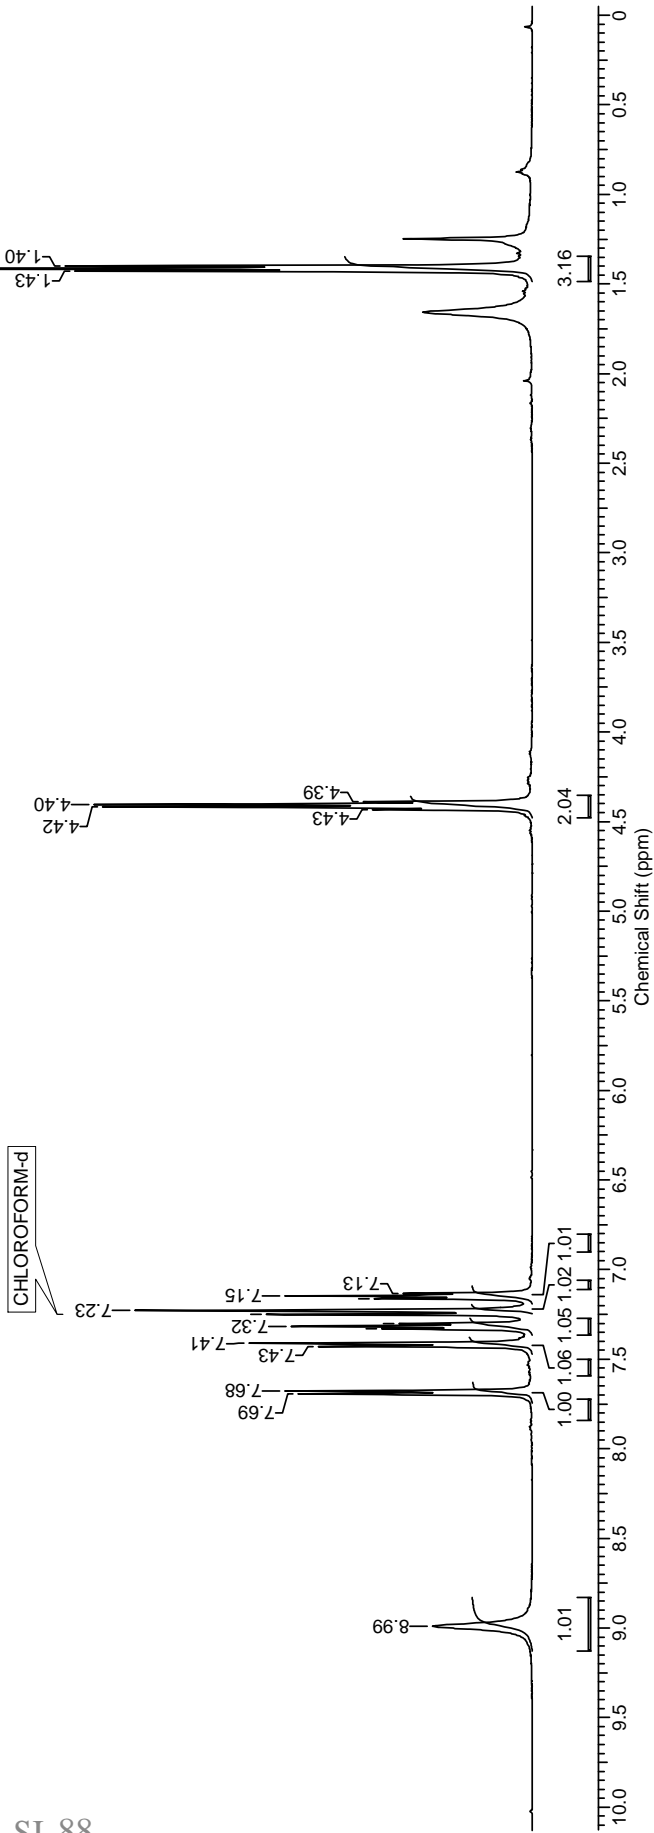



|                               |                      |                     |              |                              |                                                            |
|-------------------------------|----------------------|---------------------|--------------|------------------------------|------------------------------------------------------------|
| <b>Acquisition Time (sec)</b> | 1.0486               | <b>Comment</b>      | 13C          | <b>Date</b>                  | 30 Aug 2013 12:14:24                                       |
| <b>Date Stamp</b>             | 30 Aug 2013 12:14:24 | <b>Nucleus</b>      | 13C          | <b>File Name</b>             | \\agn1\nmr_data\AV_500\Aug_13_500\F15av500#004\3\PDAT\1\1r |
| <b>Frequency (MHz)</b>        | 125.76               | <b>Points Count</b> | 32768        | <b>Number of Transients</b>  | 674                                                        |
| <b>Owner</b>                  | nmr                  | <b>Solvent</b>      | CHLOROFORM-d | <b>Pulse Sequence</b>        | zpgg30                                                     |
| <b>Temperature (degree C)</b> | 22.900               |                     |              | <b>Receiver Gain</b>         | 575.00                                                     |
|                               |                      |                     |              | <b>Spectrum Type</b>         | STANDARD                                                   |
|                               |                      |                     |              | <b>Original Points Count</b> | 32768                                                      |
|                               |                      |                     |              | <b>SW(cyclical) (Hz)</b>     | 31250.00                                                   |
|                               |                      |                     |              | <b>Sweep Width (Hz)</b>      | 31249.05                                                   |

F15av500#004.003.001.1r.esp

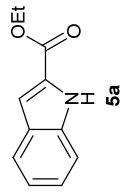

CHLOROFORM-d

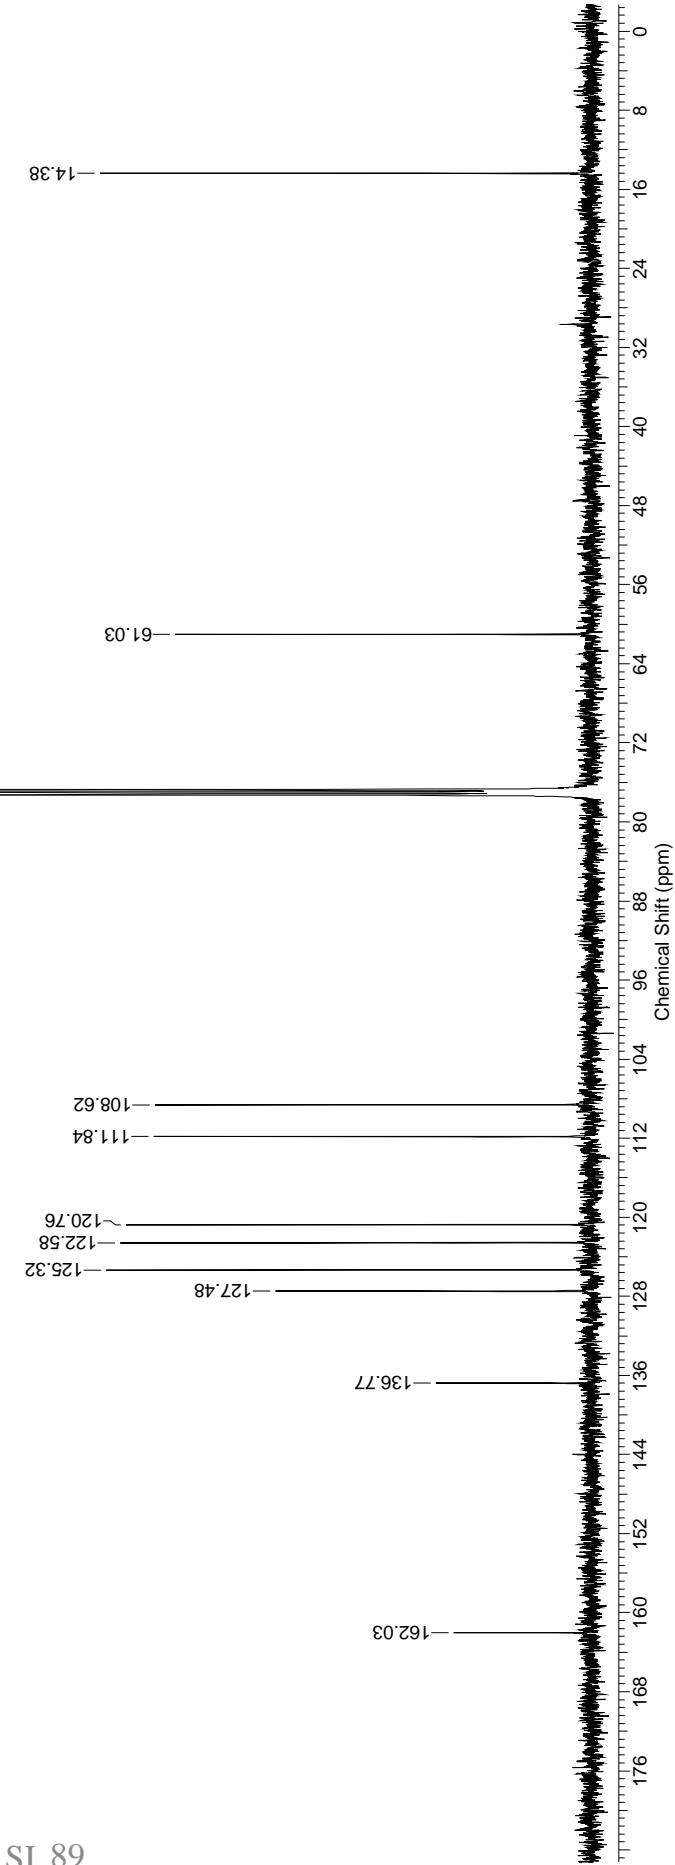

|                               |                      |                     |                 |                              |                                                             |
|-------------------------------|----------------------|---------------------|-----------------|------------------------------|-------------------------------------------------------------|
| <b>Acquisition Time (sec)</b> | 1.1010               | <b>Comment</b>      | DEPT;           | <b>Date</b>                  | 30 Aug 2013 11:33:52                                        |
| <b>Date Stamp</b>             | 30 Aug 2013 11:33:52 | <b>Nucleus</b>      | <sup>13</sup> C | <b>File Name</b>             | \\agn\hmr_data\AV_500\Aug_13_500\F15av500#004\2\PD\DATA\11r |
| <b>Frequency (MHz)</b>        | 125.76               | <b>Points Count</b> | 32768           | <b>Number of Transients</b>  | 600                                                         |
| <b>Owner</b>                  | nmr                  | <b>Solvent</b>      | CHLOROFORM-d    | <b>Pulse Sequence</b>        | dept135                                                     |
| <b>Temperature (degree C)</b> | 22.400               |                     |                 | <b>Receiver Gain</b>         | 2050.00                                                     |
|                               |                      |                     |                 | <b>Spectrum Offset (Hz)</b>  | 12569.9307                                                  |
|                               |                      |                     |                 | <b>Spectrum Type</b>         | DEPT135                                                     |
|                               |                      |                     |                 | <b>Original Points Count</b> | 32768                                                       |
|                               |                      |                     |                 | <b>SW(cyclical) (Hz)</b>     | 29761.90                                                    |
|                               |                      |                     |                 | <b>Sweep Width (Hz)</b>      | 29761.00                                                    |

F15av500#004.002.001.1r.esp

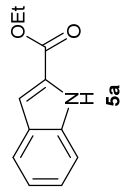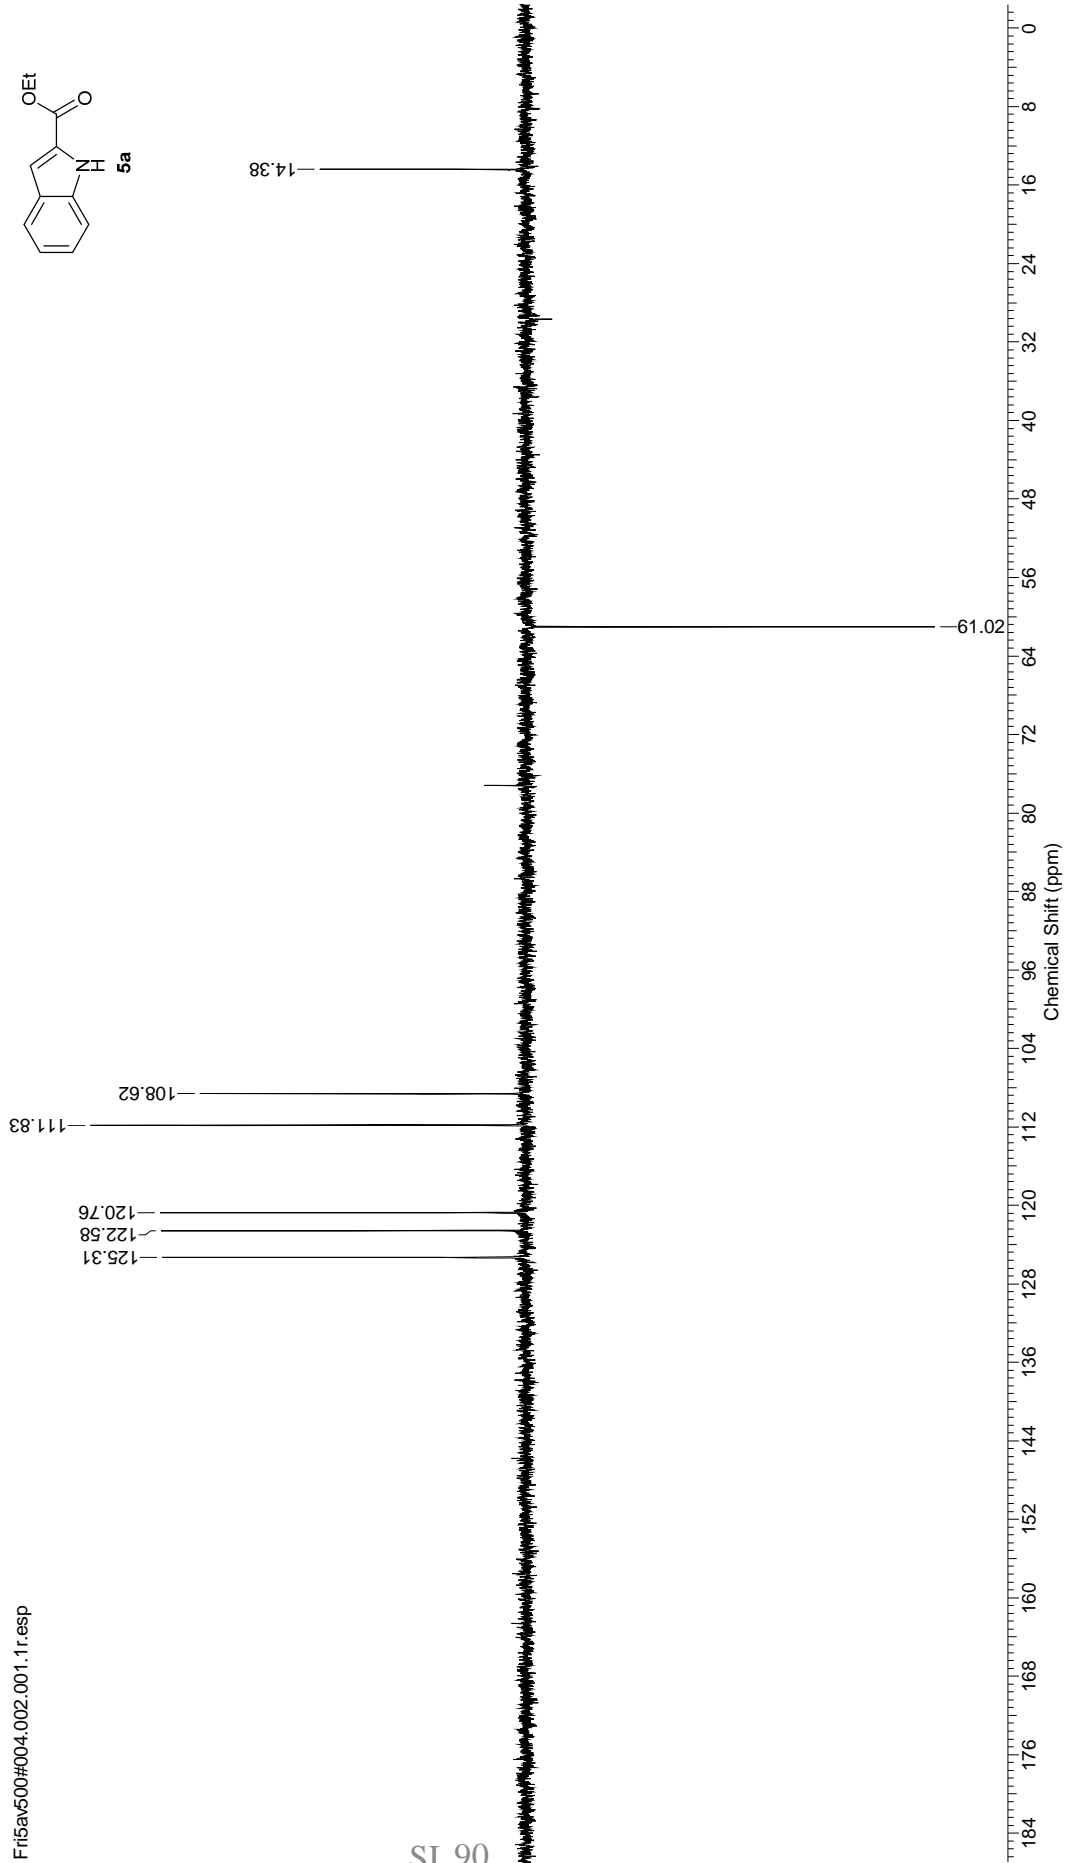

|                               |                      |                     |              |                              |                                                  |
|-------------------------------|----------------------|---------------------|--------------|------------------------------|--------------------------------------------------|
| <b>Acquisition Time (sec)</b> | 2.0031               | <b>Comment</b>      | yogesh 1H    | <b>Date</b>                  | 14 Sep 2013 13:22:40                             |
| <b>Date Stamp</b>             | 14 Sep 2013 13:22:40 | <b>Nucleus</b>      | 1H           | <b>File Name</b>             | \\agn1\nmr_data\AV_500\Sat2av500#0081\PDATA\1\1r |
| <b>Frequency (MHz)</b>        | 500.13               | <b>Points Count</b> | 32768        | <b>Number of Transients</b>  | 64                                               |
| <b>Owner</b>                  | nmr                  | <b>Solvent</b>      | CHLOROFORM-d | <b>Pulse Sequence</b>        | zg30                                             |
| <b>Temperature (degree C)</b> | 22.100               |                     |              | <b>Receiver Gain</b>         | 287.00                                           |
|                               |                      |                     |              | <b>Spectrum Type</b>         | STANDARD                                         |
|                               |                      |                     |              | <b>Spectrum Offset (Hz)</b>  | 2209.7742                                        |
|                               |                      |                     |              | <b>SW(cyclical) (Hz)</b>     | 10000.00                                         |
|                               |                      |                     |              | <b>Sweep Width (Hz)</b>      | 9999.70                                          |
|                               |                      |                     |              | <b>Original Points Count</b> | 20031                                            |

Sat2av500#008.001.001.1r.esp

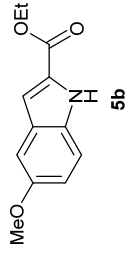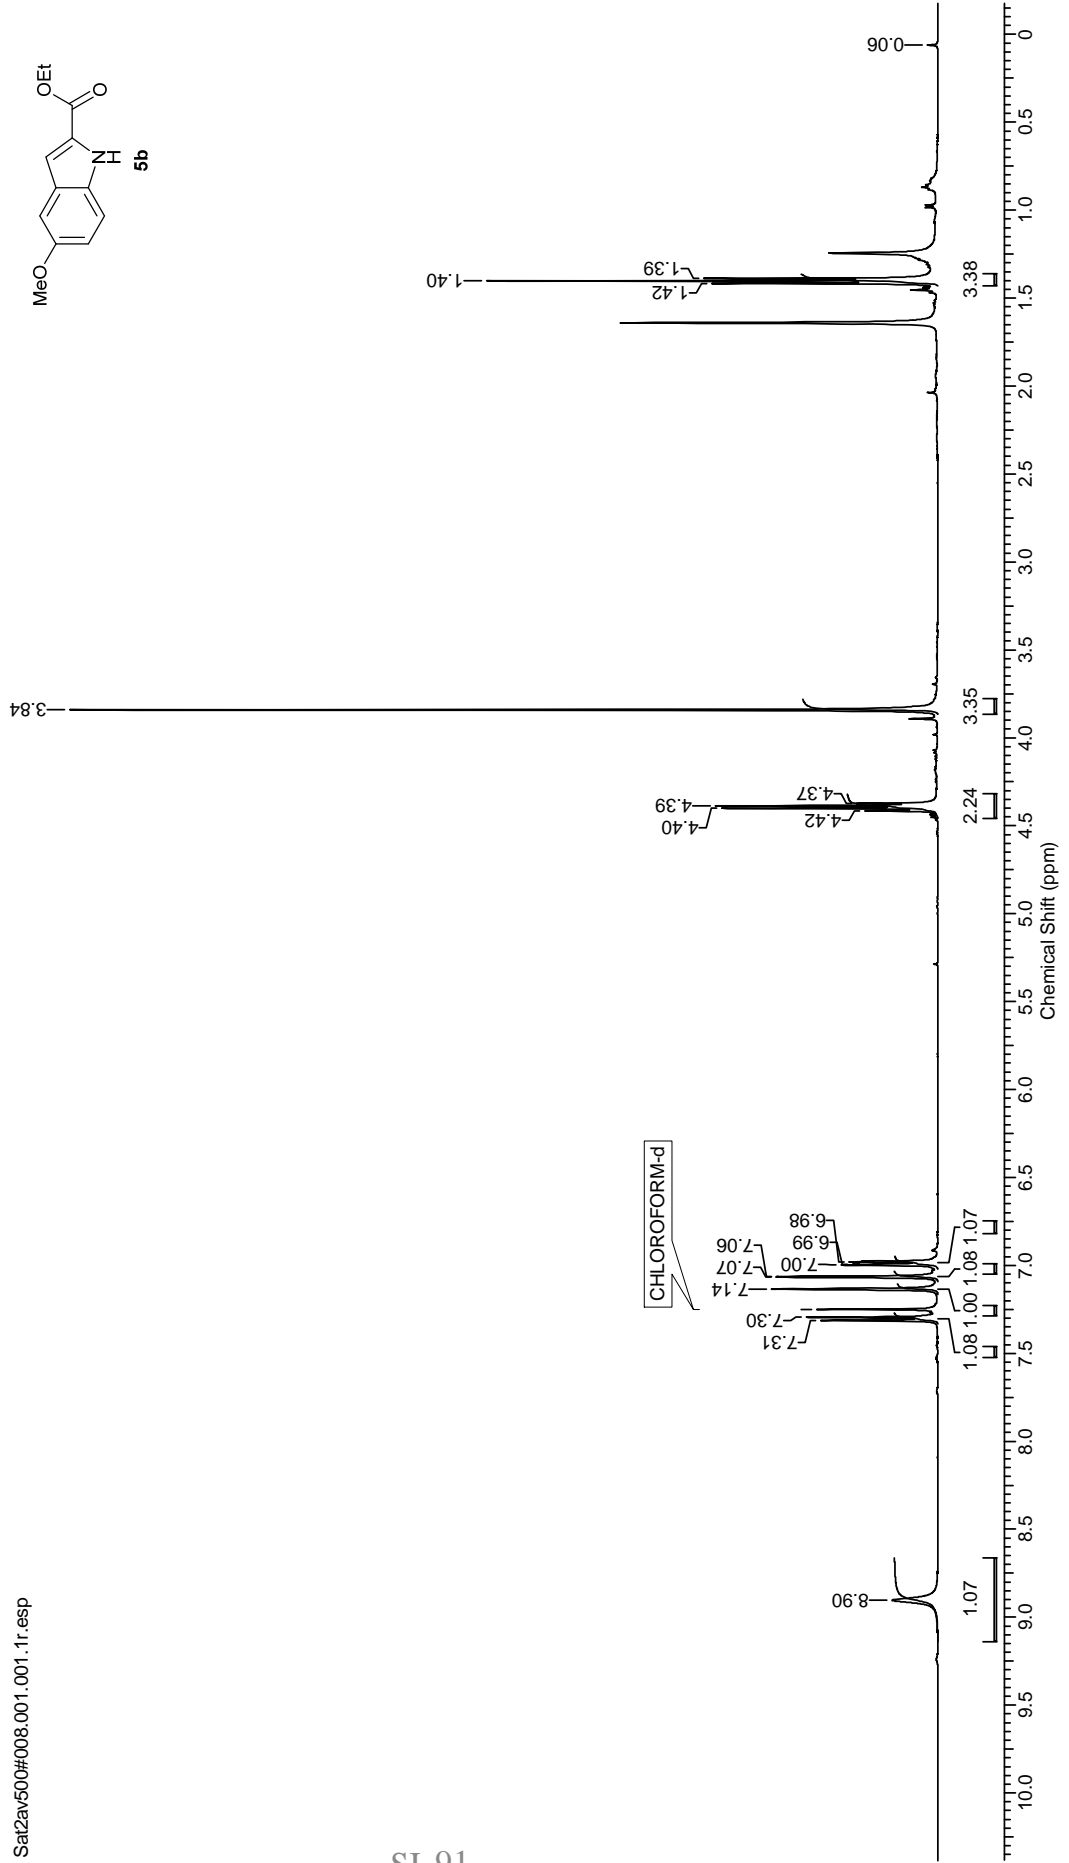

|                               |                      |                     |              |                              |                                                              |
|-------------------------------|----------------------|---------------------|--------------|------------------------------|--------------------------------------------------------------|
| <b>Acquisition Time (sec)</b> | 1.0486               | <b>Comment</b>      | 13C          | <b>Date</b>                  | 14 Sep 2013 13:58:56                                         |
| <b>Date Stamp</b>             | 14 Sep 2013 13:58:56 | <b>Nucleus</b>      | 13C          | <b>File Name</b>             | \\agn\nmr_data\AV_500\Sep_13_500\Sat2av500#008\3\PD\DATA\11r |
| <b>Frequency (MHz)</b>        | 125.76               | <b>Points Count</b> | 32768        | <b>Number of Transients</b>  | 223                                                          |
| <b>Owner</b>                  | nmr                  | <b>Solvent</b>      | CHLOROFORM-d | <b>Pulse Sequence</b>        | zpg30                                                        |
| <b>Temperature (degree C)</b> | 23.000               |                     |              | <b>Receiver Gain</b>         | 575.00                                                       |
|                               |                      |                     |              | <b>Spectrum Type</b>         | STANDARD                                                     |
|                               |                      |                     |              | <b>Original Points Count</b> | 32768                                                        |
|                               |                      |                     |              | <b>SW(cyclical) (Hz)</b>     | 31250.00                                                     |
|                               |                      |                     |              | <b>Sweep Width (Hz)</b>      | 31249.05                                                     |

Sat2av500#008.003.001.1r.esp

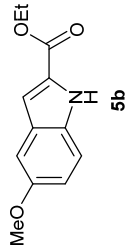

CHLOROFORM-d

SI 26

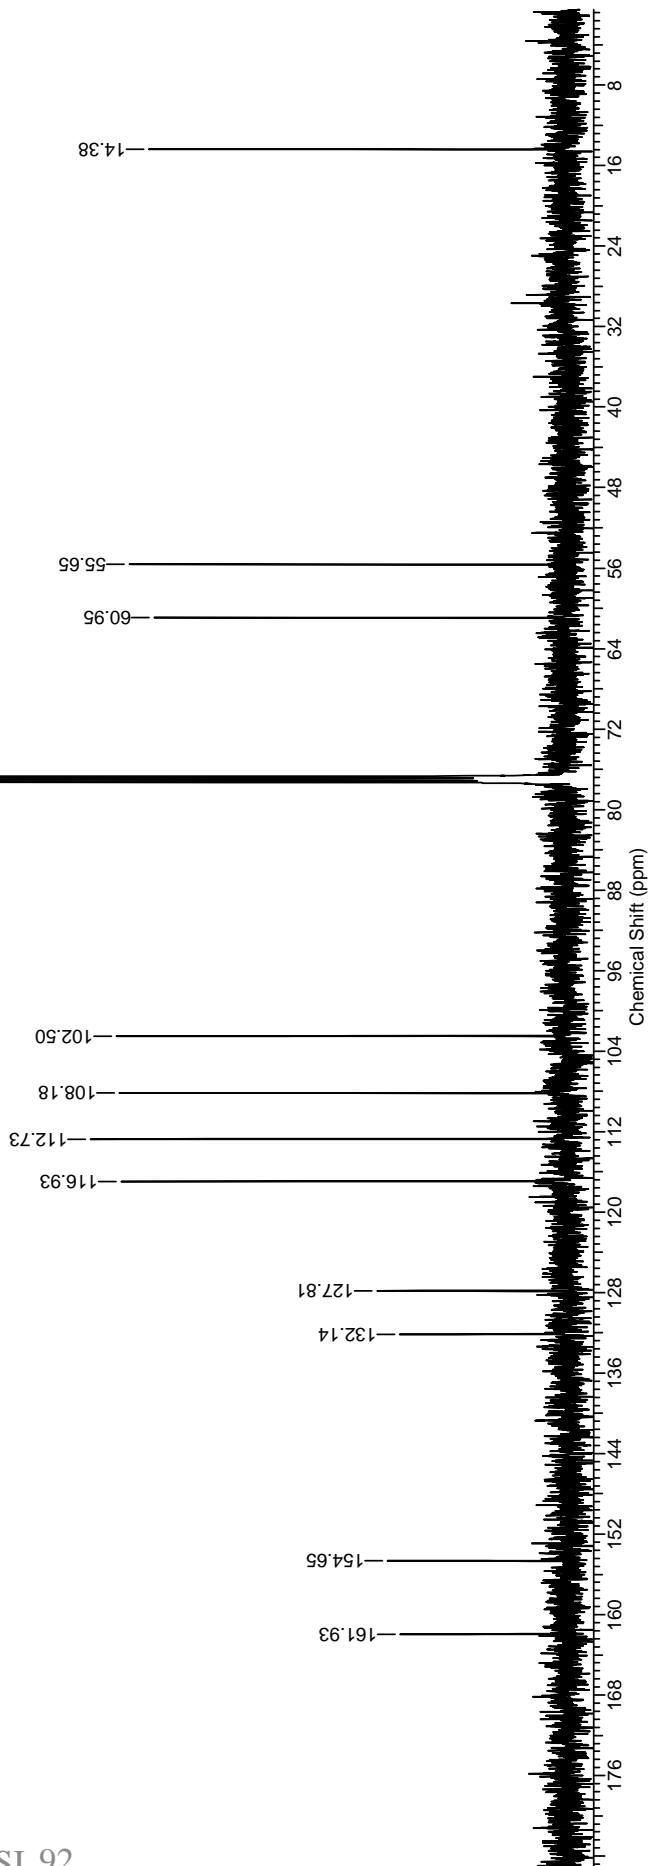

|                               |                      |                     |                 |                              |                                                            |
|-------------------------------|----------------------|---------------------|-----------------|------------------------------|------------------------------------------------------------|
| <b>Acquisition Time (sec)</b> | 1.1010               | <b>Comment</b>      | DEPT;           | <b>Date</b>                  | 14 Sep 2013 13:48:16                                       |
| <b>Date Stamp</b>             | 14 Sep 2013 13:48:16 | <b>Nucleus</b>      | <sup>13</sup> C | <b>File Name</b>             | \\agninmr_data\AV_500\Sep_13_500\Sat2av500#008\2PDATA\1\1r |
| <b>Frequency (MHz)</b>        | 125.76               | <b>Points Count</b> | 32768           | <b>Number of Transients</b>  | 600                                                        |
| <b>Owner</b>                  | nmr                  |                     |                 | <b>Pulse Sequence</b>        | dept135                                                    |
| <b>Solvent</b>                | CHLOROFORM-d         |                     |                 | <b>Receiver Gain</b>         | 2050.00                                                    |
| <b>Temperature (degree C)</b> | 22.500               |                     |                 | <b>Spectrum Type</b>         | DEPT135                                                    |
|                               |                      |                     |                 | <b>Original Points Count</b> | 32768                                                      |
|                               |                      |                     |                 | <b>SW(cyclical) (Hz)</b>     | 29761.90                                                   |
|                               |                      |                     |                 | <b>Sweep Width (Hz)</b>      | 29761.00                                                   |

Sat2av500#008.002.001.1r.esp

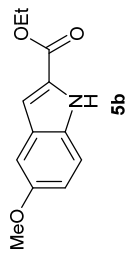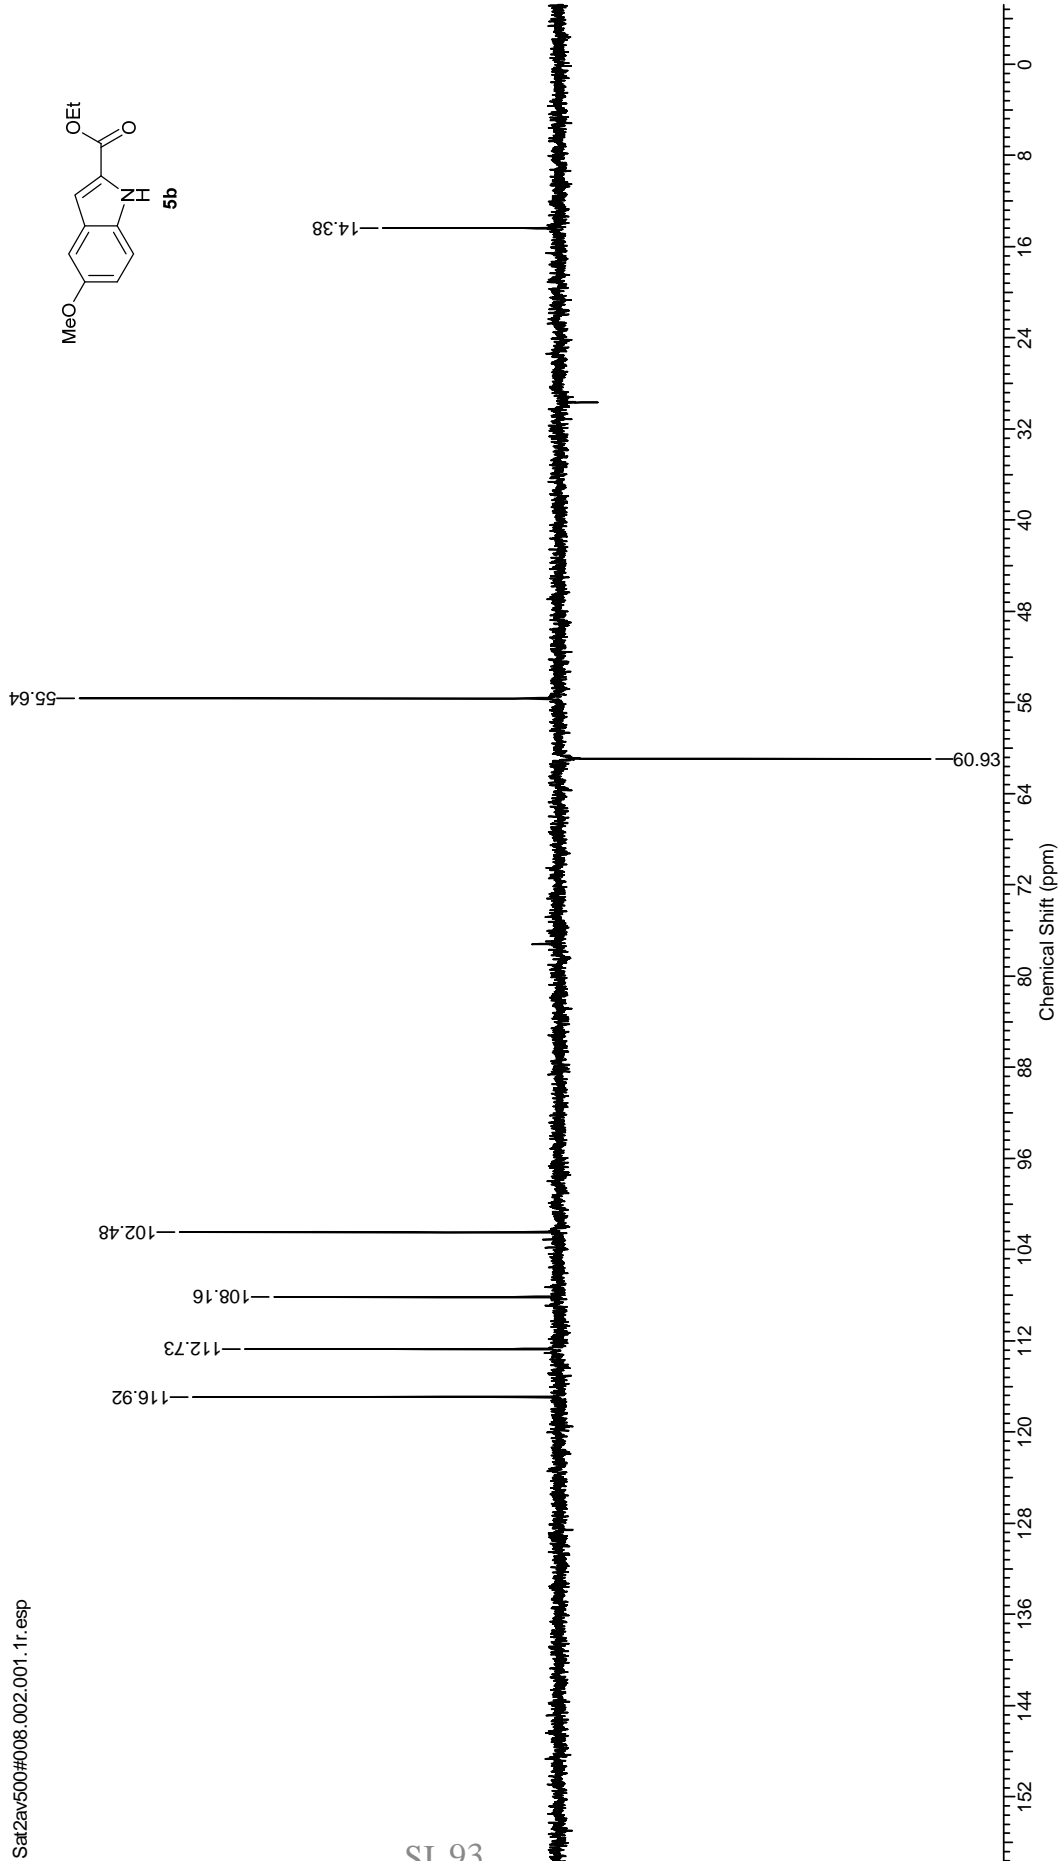

D:\Data\YM-988

9/13/2013 11:41:18 AM

YM-988 #894 RT: 3.98 AV: 1 NL: 1.12E6  
T: FTMS + p ESI Full ms [100.00-700.00]

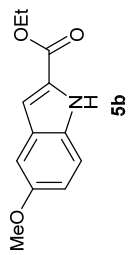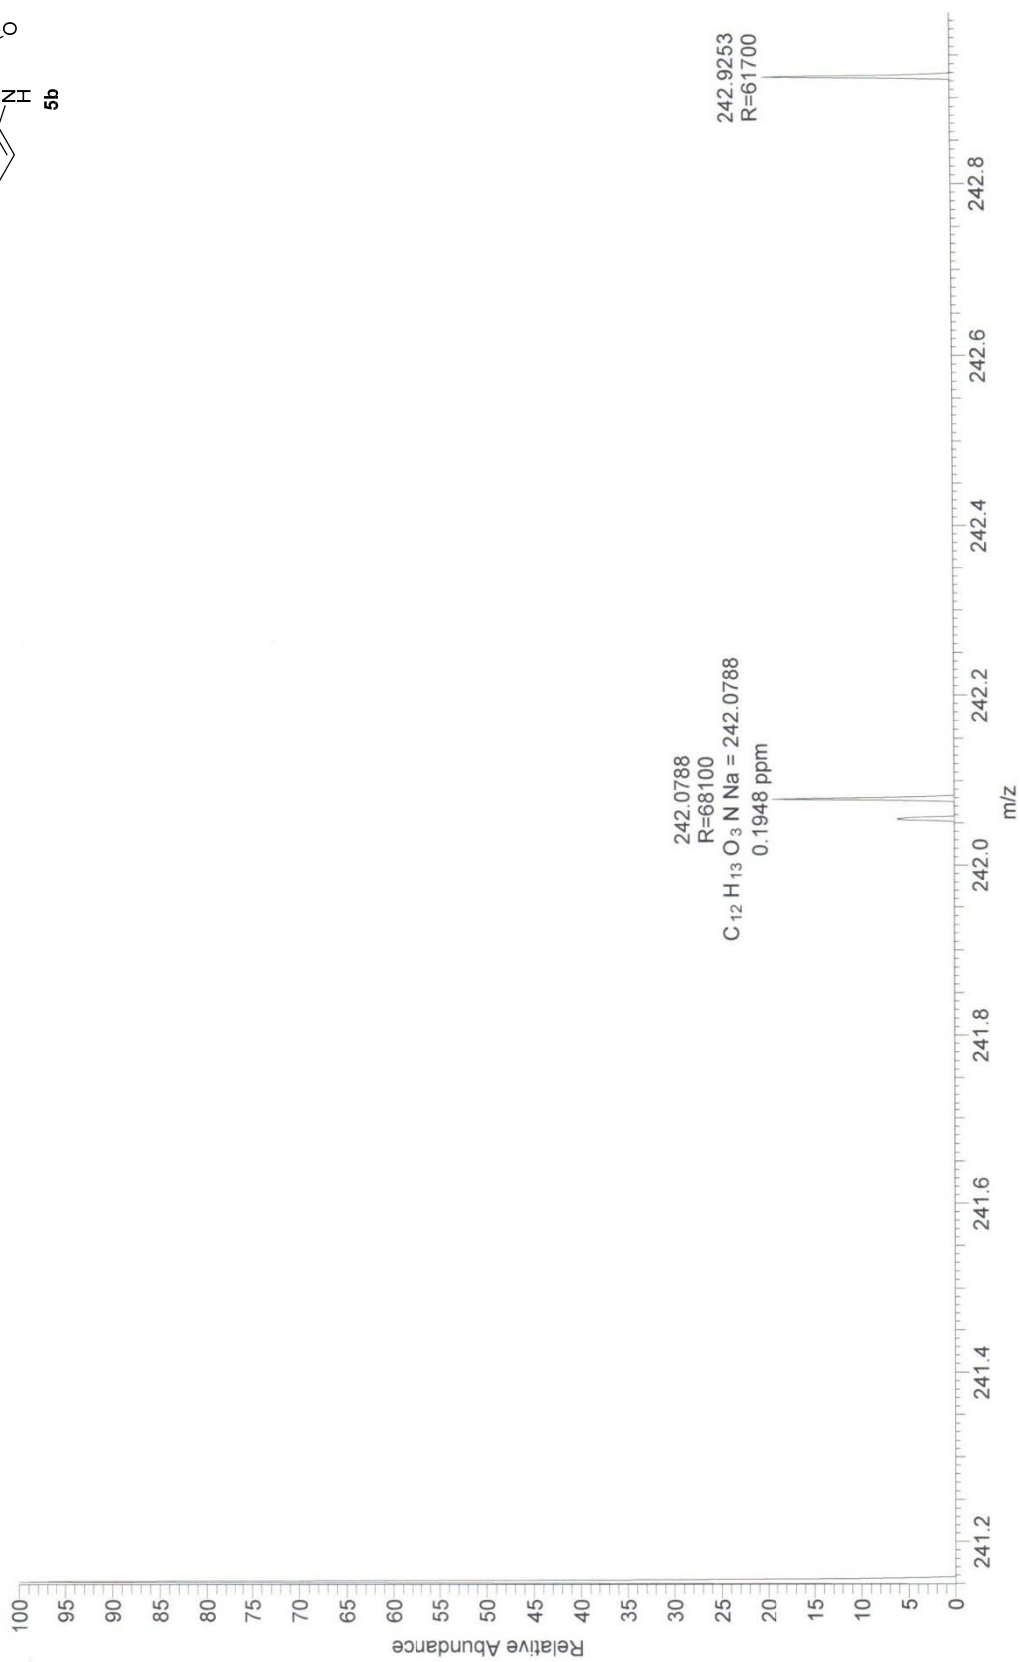

|                               |                      |                     |              |                             |                                                  |
|-------------------------------|----------------------|---------------------|--------------|-----------------------------|--------------------------------------------------|
| <b>Acquisition Time (sec)</b> | 2.0031               | <b>Comment</b>      | Yogesh 1H    | <b>Date</b>                 | 28 Aug 2013 16:04:48                             |
| <b>Date Stamp</b>             | 28 Aug 2013 16:04:48 | <b>Nucleus</b>      | 1H           | <b>File Name</b>            | \\agninmr_data\AV_500\Wed5av500#016\1\PDATA\1\1r |
| <b>Frequency (MHz)</b>        | 500.13               | <b>Points Count</b> | 32768        | <b>Number of Transients</b> | 64                                               |
| <b>Owner</b>                  | nmr                  | <b>Solvent</b>      | CHLOROFORM-d | <b>Pulse Sequence</b>       | zg30                                             |
| <b>Temperature (degree C)</b> | 22.200               |                     |              | <b>Receiver Gain</b>        | 256.00                                           |
|                               |                      |                     |              | <b>Spectrum Type</b>        | STANDARD                                         |
|                               |                      |                     |              | <b>SW(cyclical) (Hz)</b>    | 10000.00                                         |
|                               |                      |                     |              | <b>Sweep Width (Hz)</b>     | 9999.70                                          |

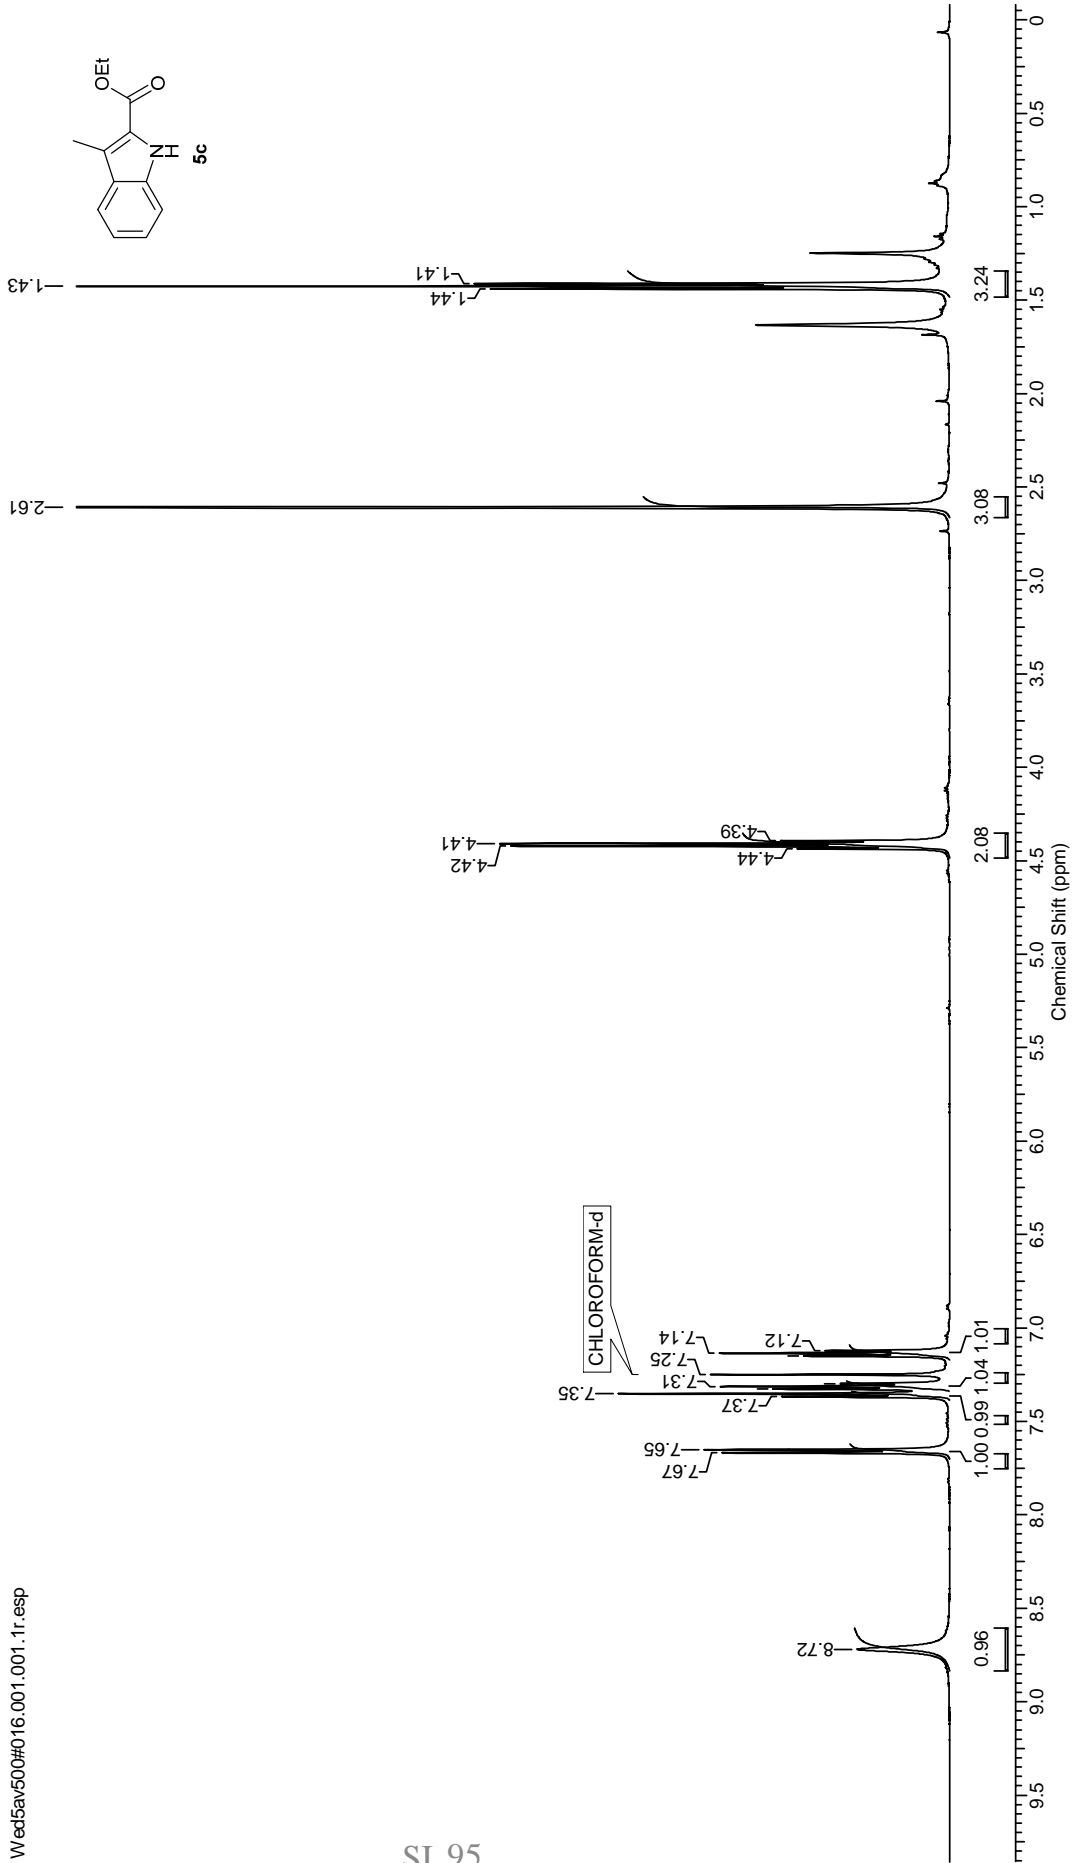

|                               |                      |                     |              |                              |                                                              |
|-------------------------------|----------------------|---------------------|--------------|------------------------------|--------------------------------------------------------------|
| <b>Acquisition Time (sec)</b> | 1.0486               | <b>Comment</b>      | 13C          | <b>Date</b>                  | 28 Aug 2013 18:17:04                                         |
| <b>Date Stamp</b>             | 28 Aug 2013 18:17:04 | <b>Nucleus</b>      | 13C          | <b>File Name</b>             | \\agn\nmr_data\AV_500\Aug_13_500\Wed5av500#016\3\DPDATA\111r |
| <b>Frequency (MHz)</b>        | 125.76               | <b>Points Count</b> | 32768        | <b>Number of Transients</b>  | 1525                                                         |
| <b>Owner</b>                  | nmr                  | <b>Solvent</b>      | CHLOROFORM-d | <b>Pulse Sequence</b>        | zpgg30                                                       |
| <b>Temperature (degree C)</b> | 23.000               |                     |              | <b>Receiver Gain</b>         | 575.00                                                       |
|                               |                      |                     |              | <b>Spectrum Type</b>         | STANDARD                                                     |
|                               |                      |                     |              | <b>Original Points Count</b> | 32768                                                        |
|                               |                      |                     |              | <b>SW(cyclical) (Hz)</b>     | 31250.00                                                     |
|                               |                      |                     |              | <b>Sweep Width (Hz)</b>      | 31249.05                                                     |

Wed5av500#016.003.001.1r.esp

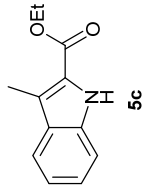

CHLOROFORM-d

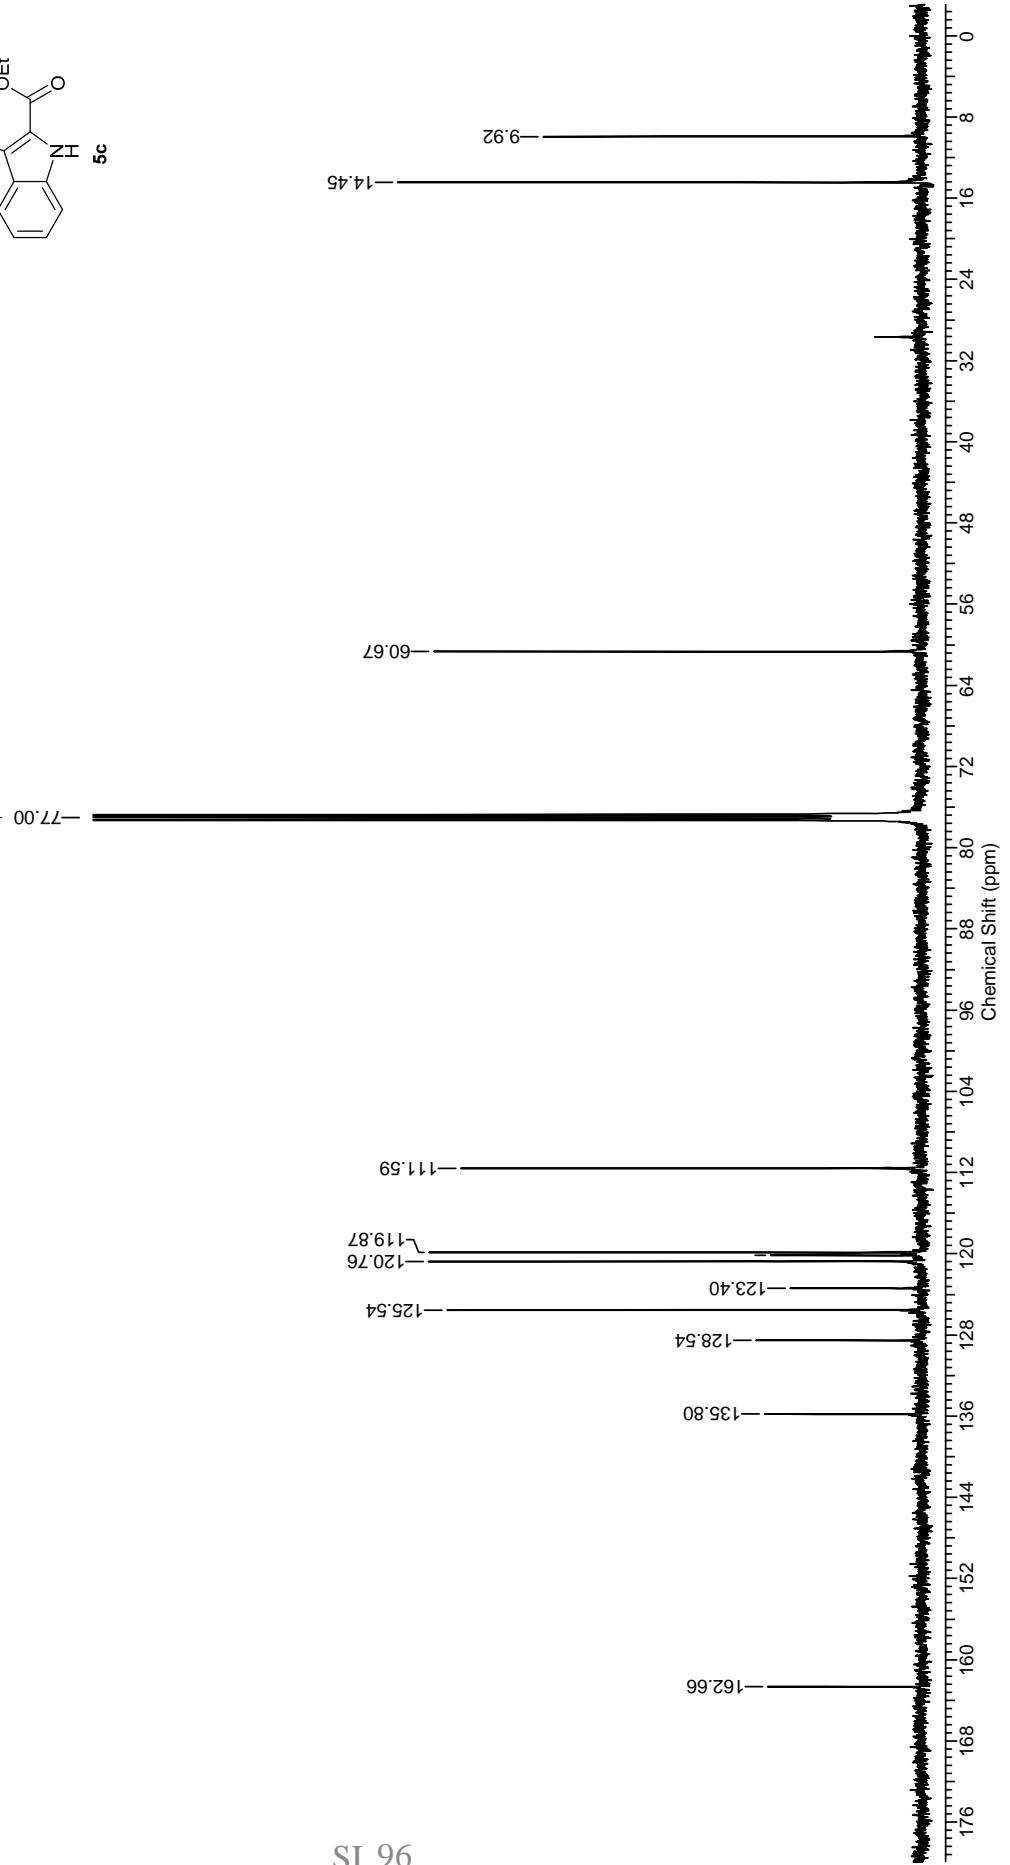



|                               |                      |                     |              |                              |                                                         |
|-------------------------------|----------------------|---------------------|--------------|------------------------------|---------------------------------------------------------|
| <b>Acquisition Time (sec)</b> | 1.1010               | <b>Comment</b>      | DEPT;        | <b>Date</b>                  | 28 Aug 2013 16:58:08                                    |
| <b>Date Stamp</b>             | 28 Aug 2013 16:58:08 | <b>Nucleus</b>      | 13C          | <b>File Name</b>             | \\agn1\nmr_data\AV_500\AV_500\Wed5av500#0162\IPDATA\11r |
| <b>Frequency (MHz)</b>        | 125.76               | <b>Points Count</b> | 32768        | <b>Number of Transients</b>  | 1200                                                    |
| <b>Owner</b>                  | nmr                  | <b>Solvent</b>      | CHLOROFORM-d | <b>Pulse Sequence</b>        | dept135                                                 |
| <b>Temperature (degree C)</b> | 22.500               |                     |              | <b>Receiver Gain</b>         | 2050.00                                                 |
|                               |                      |                     |              | <b>Spectrum Type</b>         | DEPT135                                                 |
|                               |                      |                     |              | <b>Original Points Count</b> | 32768                                                   |
|                               |                      |                     |              | <b>SW(cyclical) (Hz)</b>     | 29761.90                                                |
|                               |                      |                     |              | <b>Sweep Width (Hz)</b>      | 29761.00                                                |

Wed5av500#016.002.001.1r.esp

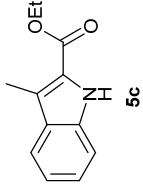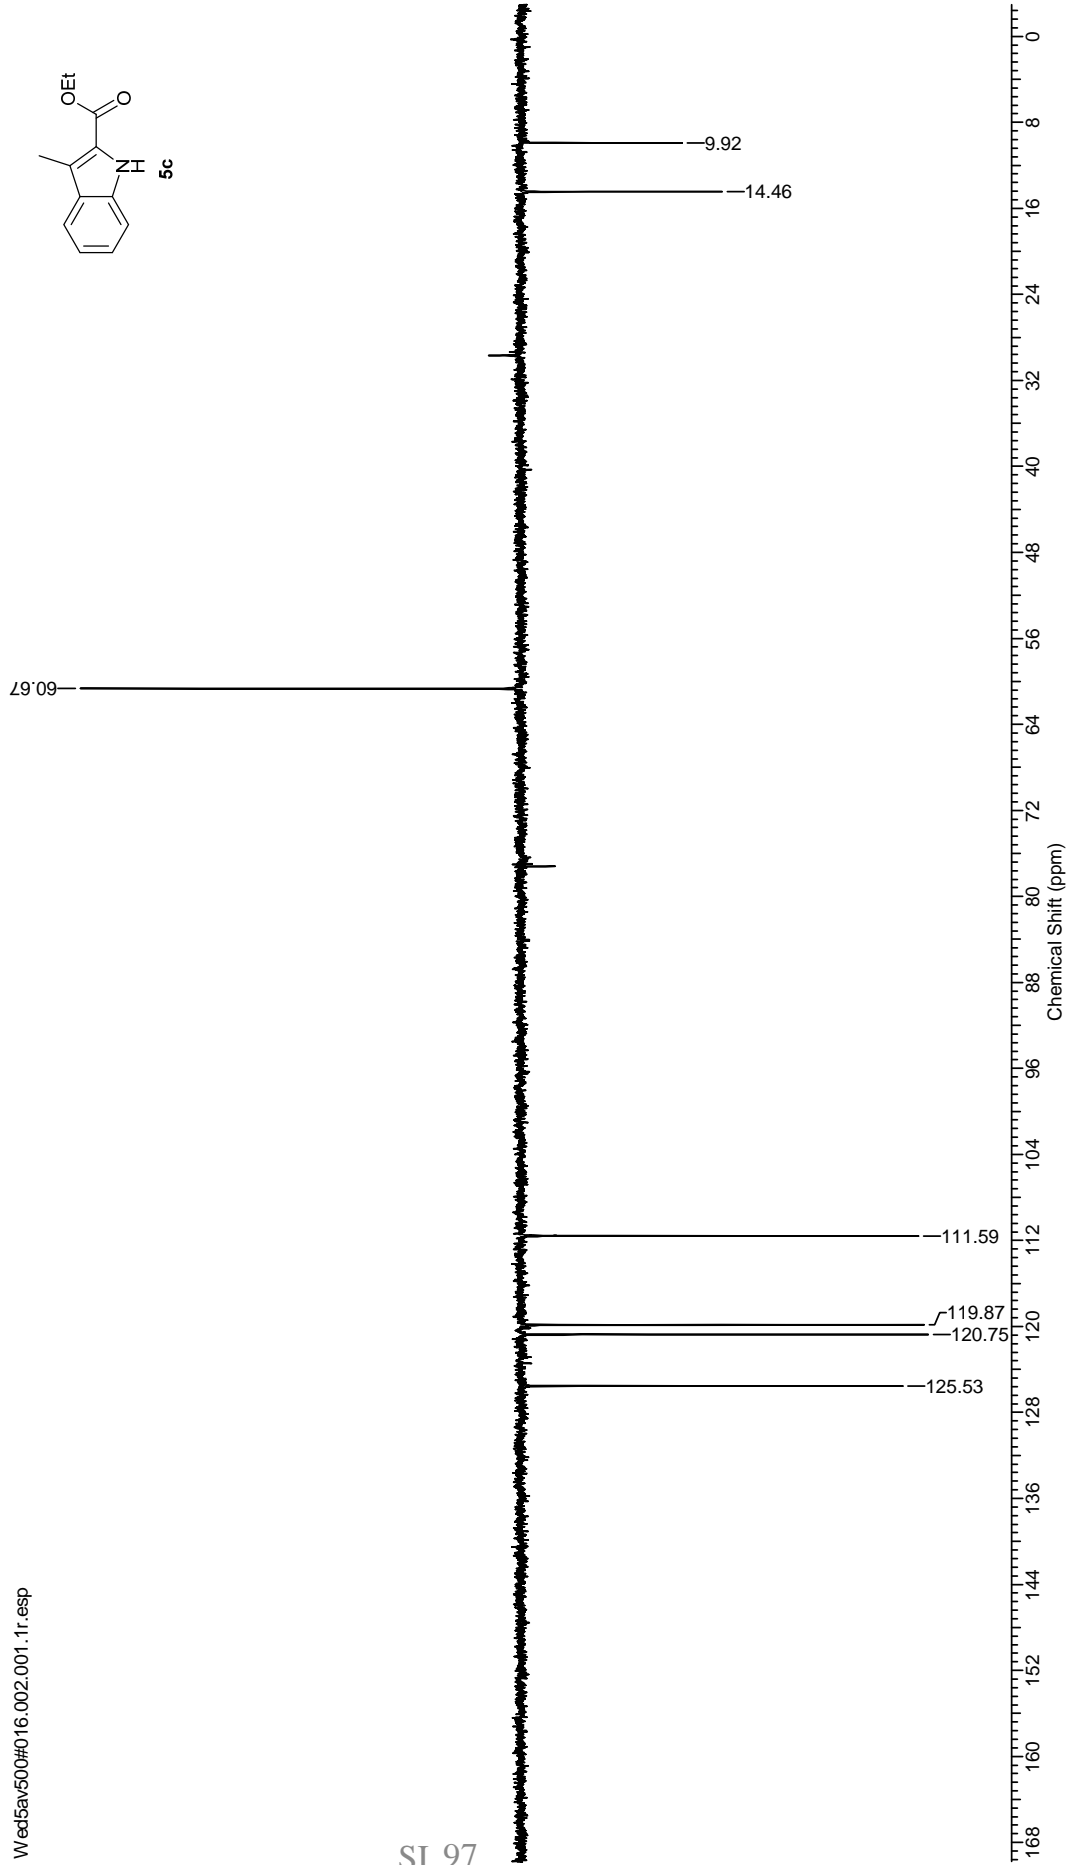

|                               |                      |                             |                                                              |                              |                      |
|-------------------------------|----------------------|-----------------------------|--------------------------------------------------------------|------------------------------|----------------------|
| <b>Acquisition Time (sec)</b> | 2.0031               | <b>Comment</b>              | Yogesh 1H                                                    | <b>Date</b>                  | 03 Oct 2013 11:21:04 |
| <b>Date Stamp</b>             | 03 Oct 2013 11:21:04 | <b>File Name</b>            | \agn\nmr_data\AV_500\Oct_13_500\Thu1av500#001\1\1\PDATA\1\1r |                              |                      |
| <b>Frequency (MHz)</b>        | 500.13               | <b>Nucleus</b>              | 1H                                                           | <b>Origin</b>                | spect                |
| <b>Owner</b>                  | nmr                  | <b>Points Count</b>         | 32768                                                        | <b>Receiver Gain</b>         | 203.00               |
| <b>Solvent</b>                | CHLOROFORM-d         | <b>Spectrum Offset (Hz)</b> | 2209.7744                                                    | <b>Spectrum Type</b>         | STANDARD             |
| <b>Temperature (degree C)</b> | 22.700               | <b>Number of Transients</b> | 37                                                           | <b>Original Points Count</b> | 20031                |
|                               |                      | <b>Pulse Sequence</b>       | zg30                                                         | <b>SW(cyclical) (Hz)</b>     | 10000.00             |
|                               |                      |                             |                                                              | <b>Sweep Width (Hz)</b>      | 9999.70              |

Thu1av500#001.001.001.f1r.esp

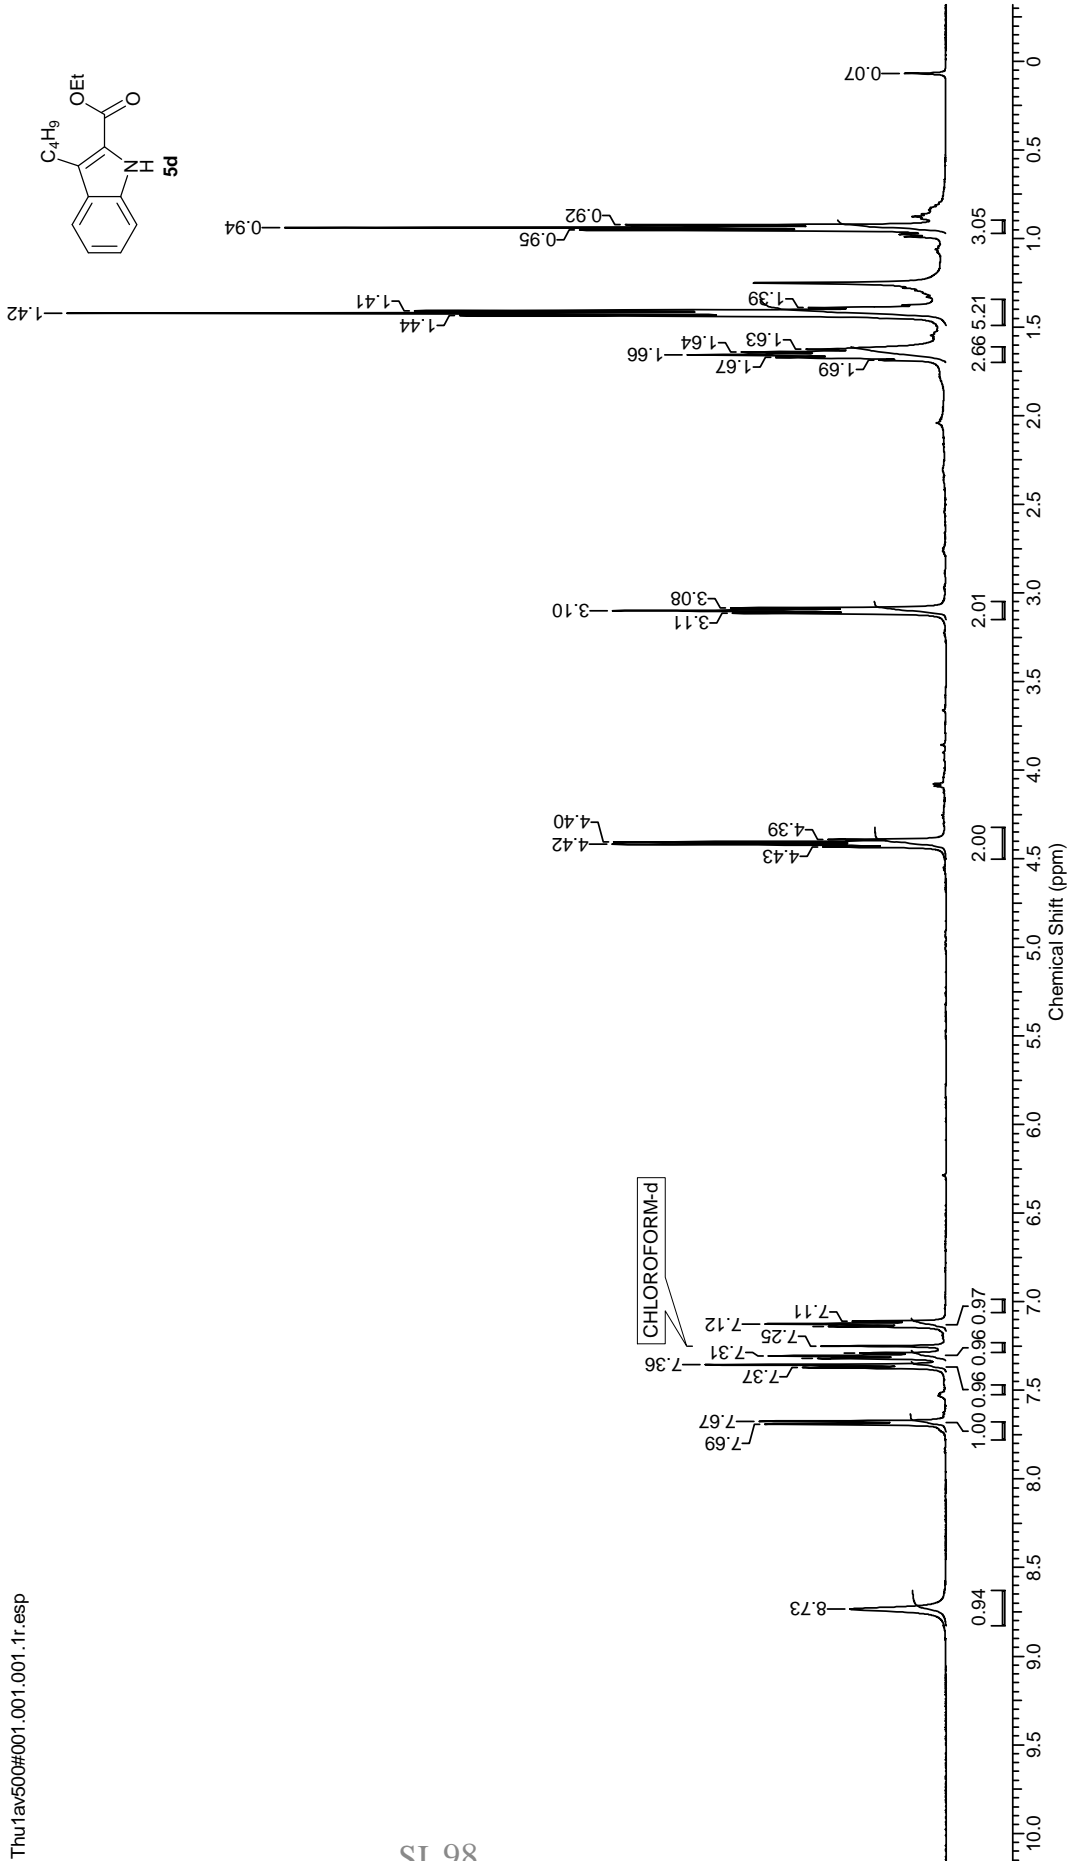

|                               |                      |                              |                                                           |                             |                      |
|-------------------------------|----------------------|------------------------------|-----------------------------------------------------------|-----------------------------|----------------------|
| <b>Acquisition Time (sec)</b> | 1.0486               | <b>Comment</b>               | 13C                                                       | <b>Date</b>                 | 03 Oct 2013 11:50:56 |
| <b>Date Stamp</b>             | 03 Oct 2013 11:50:56 | <b>File Name</b>             | \agn\nmr_data\AV_500\Oct_13_500\Thu1av500#001\3\PDAT\1\1r |                             |                      |
| <b>Frequency (MHz)</b>        | 125.76               | <b>Nucleus</b>               | 13C                                                       | <b>Number of Transients</b> | 512                  |
| <b>Owner</b>                  | nmr                  | <b>Points Count</b>          | 32768                                                     | <b>Receiver Gain</b>        | 575.00               |
| <b>Solvent</b>                | CHLOROFORM-d         | <b>Spectrum Offset (Hz)</b>  | 12570.5986                                                | <b>Spectrum Type</b>        | STANDARD             |
| <b>Temperature (degree C)</b> | 23.600               | <b>Original Points Count</b> | 32768                                                     | <b>SW(cyclical) (Hz)</b>    | 31250.00             |
|                               |                      | <b>Sweep Width (Hz)</b>      | 31249.05                                                  |                             |                      |

Thu1av500#001.003.001.1f.esp

CHLOROFORM-d

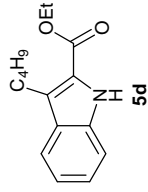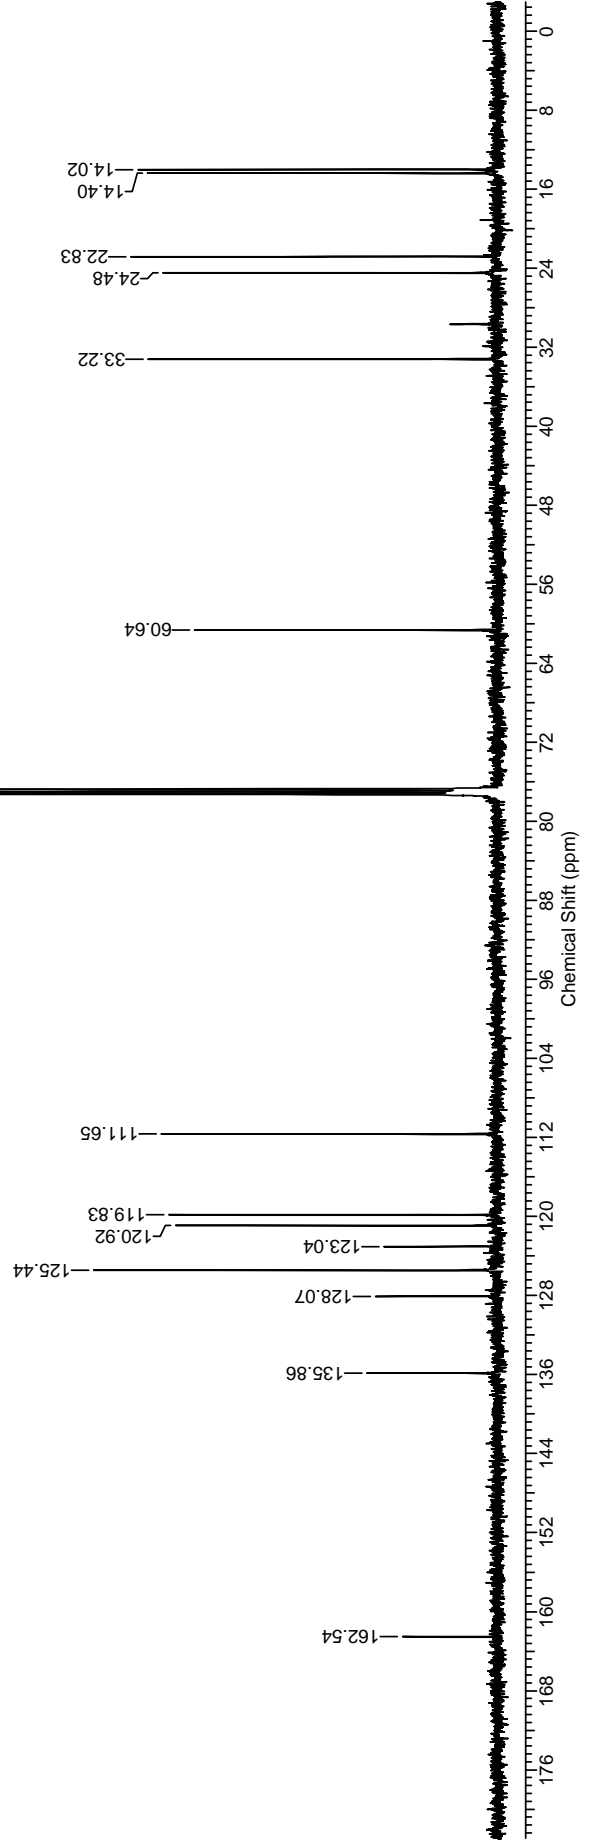

|                               |                      |                              |          |                             |                                                            |
|-------------------------------|----------------------|------------------------------|----------|-----------------------------|------------------------------------------------------------|
| <b>Acquisition Time (sec)</b> | 1.0486               | <b>Comment</b>               | DEPT;    | <b>Date</b>                 | 03 Oct 2013 11:23:12                                       |
| <b>Date Stamp</b>             | 03 Oct 2013 11:23:12 | <b>Nucleus</b>               | 13C      | <b>File Name</b>            | \agninmr_data\AV_500\Oct_13_500\Thu1av500#001\2\PDATA\1\1r |
| <b>Frequency (MHz)</b>        | 125.76               | <b>Points Count</b>          | 32768    | <b>Number of Transients</b> | spect                                                      |
| <b>Owner</b>                  | nmr                  | <b>Spectrum Type</b>         | DEPT135  | <b>Pulse Sequence</b>       | dept135                                                    |
| <b>Solvent</b>                | CHLOROFORM-d         | <b>Receiver Gain</b>         | 2050.00  | <b>Spectrum Offset (Hz)</b> | 12570.6387                                                 |
| <b>Temperature (degree C)</b> | 22.900               | <b>Original Points Count</b> | 32768    | <b>SW(cyclical) (Hz)</b>    | 31250.00                                                   |
|                               |                      | <b>Sweep Width (Hz)</b>      | 31249.05 |                             |                                                            |

Thu1av500#001.002.001.1r.esp

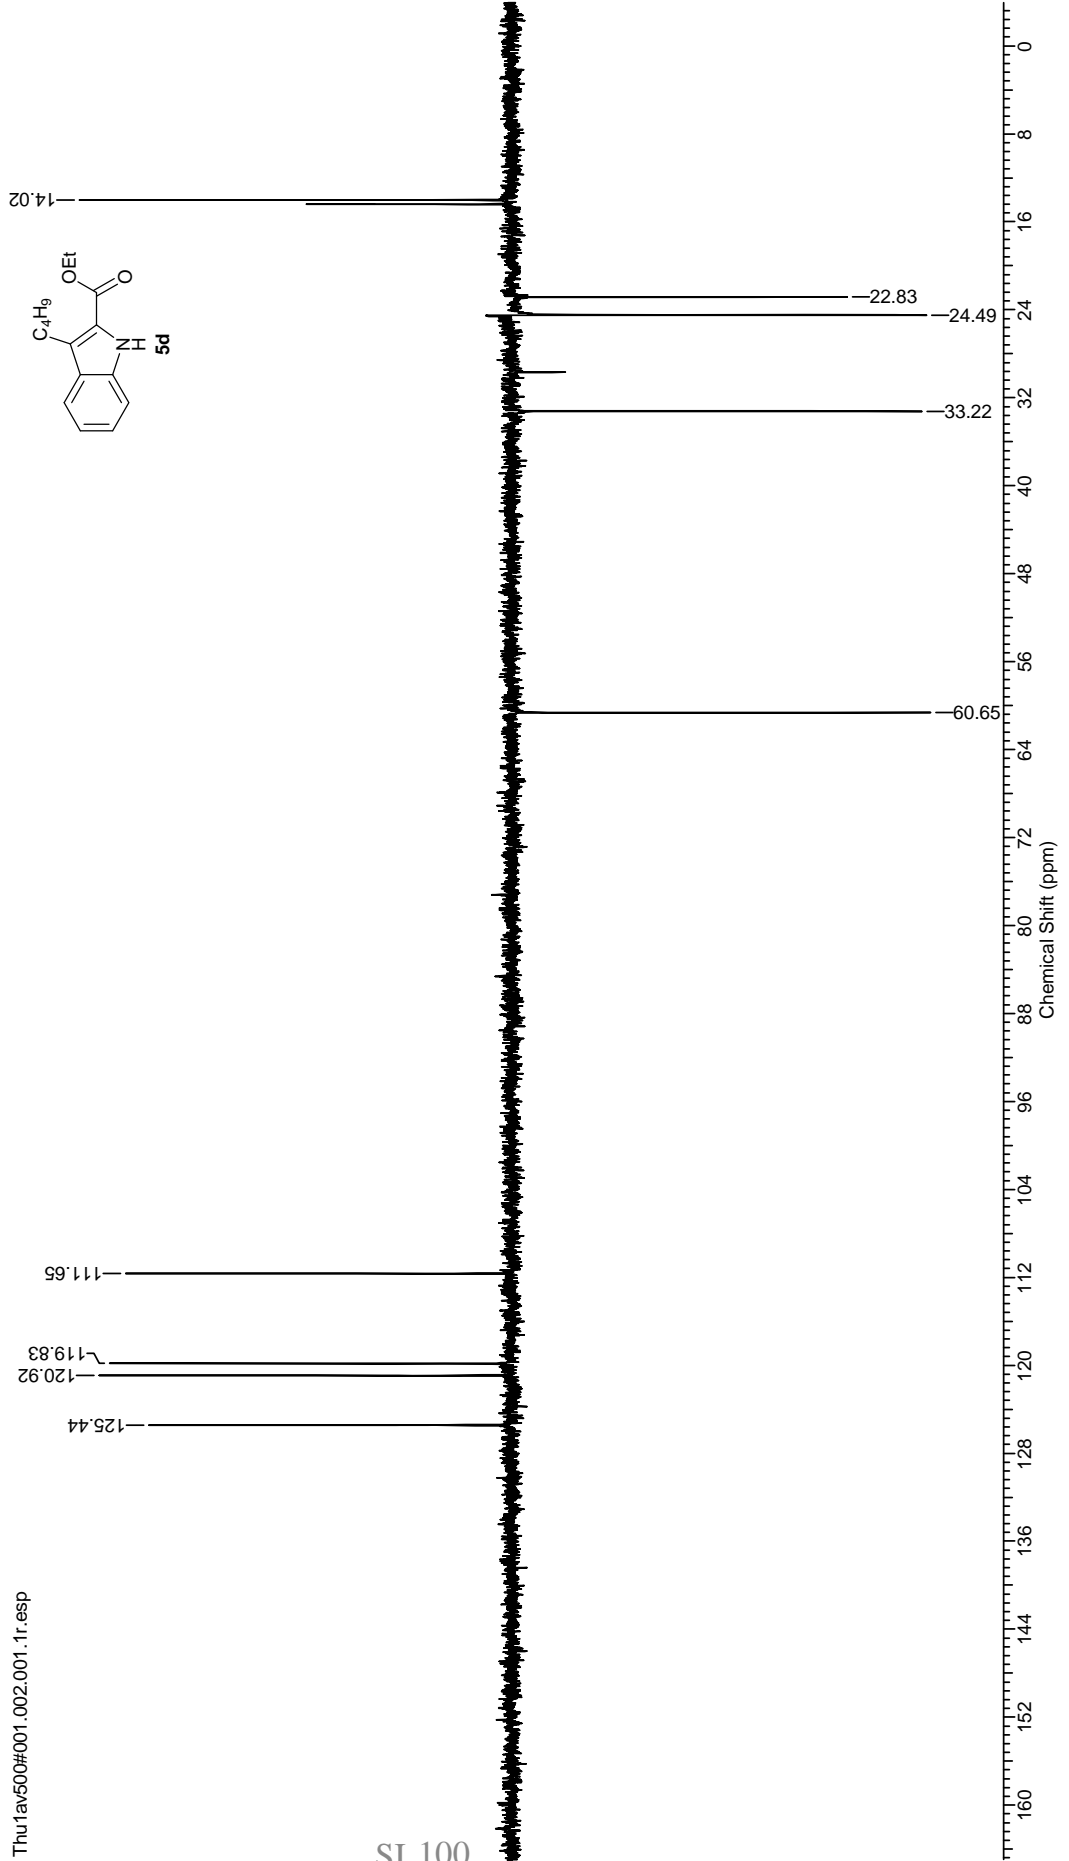



|                        |                      |                   |                                                                                      |                        |                      |
|------------------------|----------------------|-------------------|--------------------------------------------------------------------------------------|------------------------|----------------------|
| Acquisition Time (sec) | 3.9584               | Comment           | Yogesh                                                                               | Date                   | 13 Sep 2013 15:04:40 |
| Date Stamp             | 13 Sep 2013 15:04:40 | File Name         | \\lagri\hmr_data\AV200\SEPT_13#AV200\data\Administrator\hmr\Fri2av2#031\1\PDATA\1\1r | Origin                 | av200                |
| Frequency (MHz)        | 200.13               | Nucleus           | 1H                                                                                   | Points Count           | 32768                |
| Original Points Count  | 16384                | Owner             | Administrator                                                                        | Pulse Sequence         | zg30                 |
| Receiver Gain          | 1149.40              | SW(cyclical) (Hz) | 4139.07                                                                              | Solvent                | CHLOROFORM-d         |
| Spectrum Offset (Hz)   | 1225.5343            | Spectrum Type     | STANDARD                                                                             | Sweep Width (Hz)       | 4138.95              |
|                        |                      |                   |                                                                                      | Temperature (degree C) | 27.000               |

Fri2av2#031.001.001.1r.esp

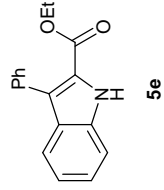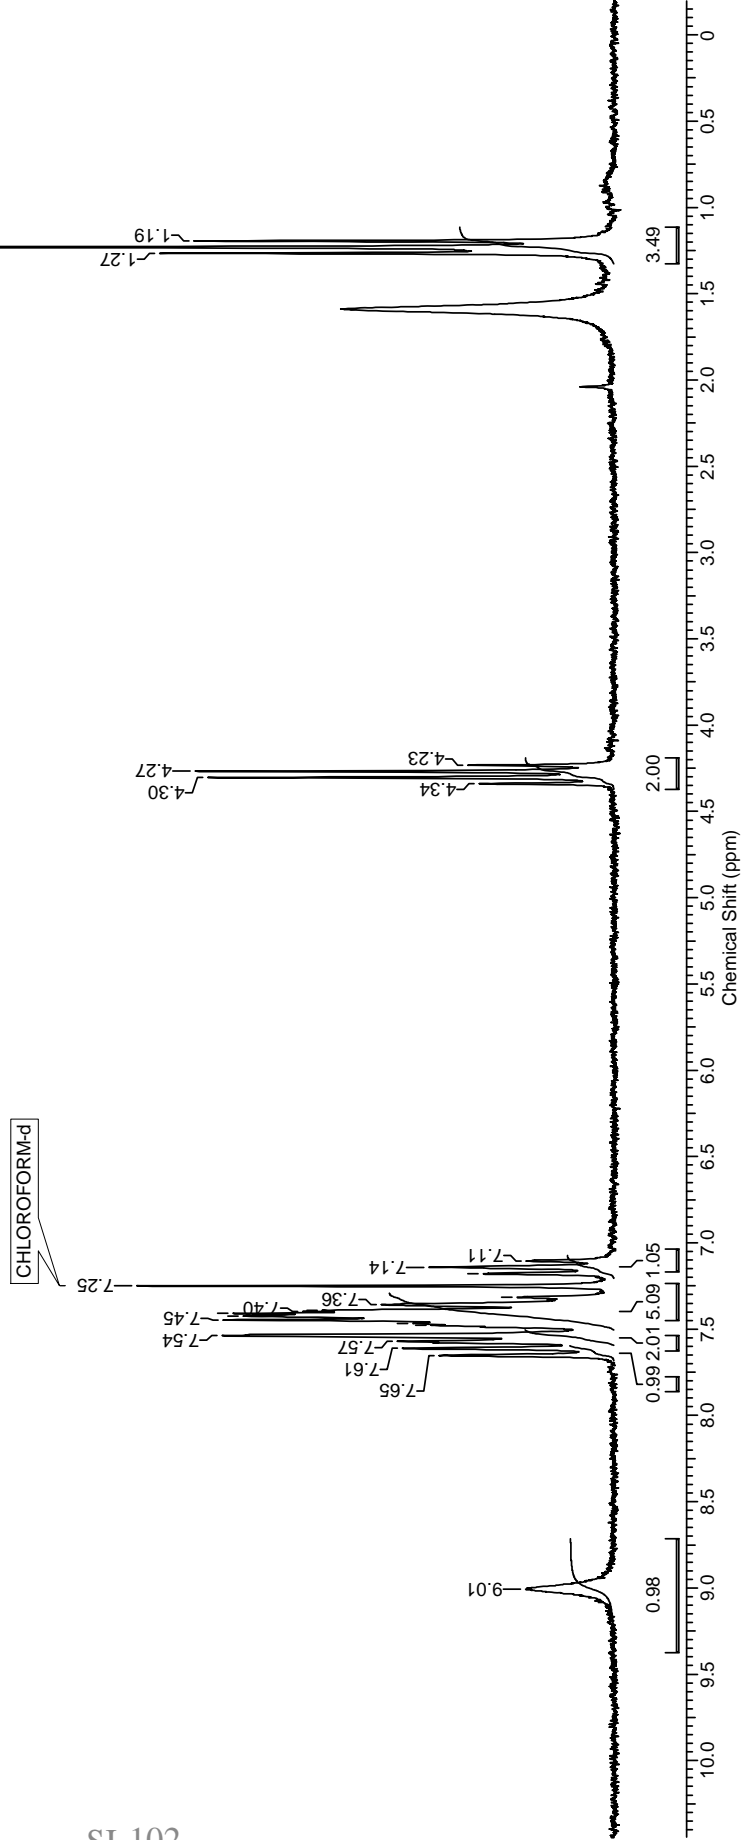

|                               |                      |                          |                                                                                   |                               |                      |
|-------------------------------|----------------------|--------------------------|-----------------------------------------------------------------------------------|-------------------------------|----------------------|
| <b>Acquisition Time (sec)</b> | 0.6832               | <b>Comment</b>           | yogesh                                                                            | <b>Date</b>                   | 14 Sep 2013 21:39:20 |
| <b>Date Stamp</b>             | 14 Sep 2013 21:39:20 | <b>File Name</b>         | \agn\nmr_data\AV200\SEPT_13#AV200\data\Administrator\vmr\Sat2av2#051\2\PDATA\111r |                               |                      |
| <b>Frequency (MHz)</b>        | 50.32                | <b>Nucleus</b>           | 13C                                                                               | <b>Number of Transients</b>   | 1600                 |
| <b>Original Points Count</b>  | 8192                 | <b>Owner</b>             | Administrator                                                                     | <b>Points Count</b>           | 32768                |
| <b>Receiver Gain</b>          | 812.70               | <b>SW(cyclical) (Hz)</b> | 11990.41                                                                          | <b>Pulse Sequence</b>         | zpg30                |
| <b>Spectrum Offset (Hz)</b>   | 5029.8706            | <b>Spectrum Type</b>     | STANDARD                                                                          | <b>Solvent</b>                | CHLOROFORM-d         |
|                               |                      | <b>Sweep Width (Hz)</b>  | 11990.04                                                                          | <b>Temperature (degree C)</b> | 27.000               |

Sat2av2#051.002.001.1r.esp

Sat2av2#051.002.001.1r.esp

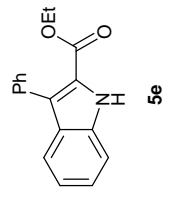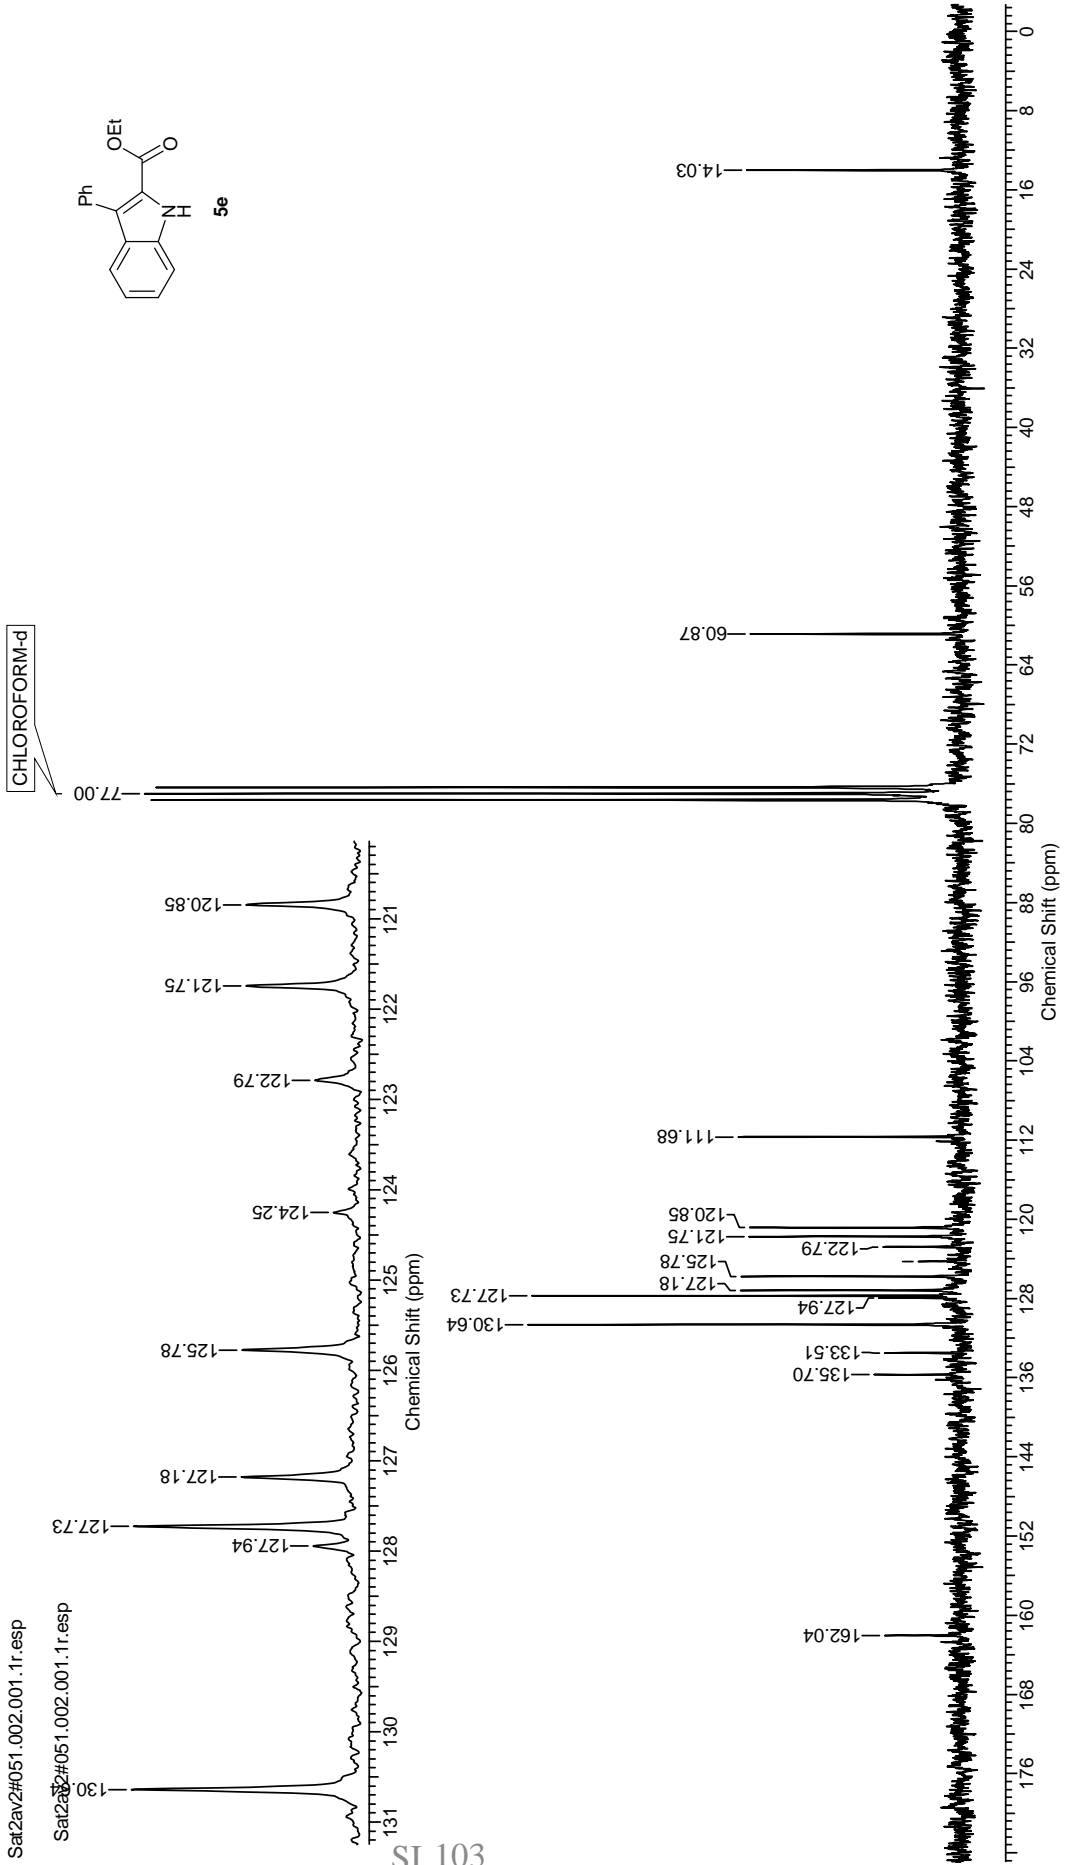

|                               |                      |                          |               |                               |                                                                                   |
|-------------------------------|----------------------|--------------------------|---------------|-------------------------------|-----------------------------------------------------------------------------------|
| <b>Acquisition Time (sec)</b> | 0.6832               | <b>Comment</b>           | yogesh        | <b>Date</b>                   | 14 Sep 2013 20:24:40                                                              |
| <b>Date Stamp</b>             | 14 Sep 2013 20:24:40 |                          |               | <b>File Name</b>              | \\agninmr_data\AV200\SEPT_13\AV200\data\Administrator\nmr\Sat2av#051\1\PDATA\111r |
| <b>Frequency (MHz)</b>        | 50.32                | <b>Nucleus</b>           | 13C           | <b>Number of Transients</b>   | 800                                                                               |
| <b>Original Points Count</b>  | 8192                 | <b>Owner</b>             | Administrator | <b>Origin</b>                 | av200                                                                             |
| <b>Receiver Gain</b>          | 16384.00             | <b>SW(cyclical) (Hz)</b> | 11990.41      | <b>Pulse Sequence</b>         | dept135                                                                           |
| <b>Spectrum Offset (Hz)</b>   | 5029.1680            | <b>Spectrum Type</b>     | DEPT135       | <b>Solvent</b>                | CHLOROFORM-d                                                                      |
|                               |                      |                          |               | <b>Sweep Width (Hz)</b>       | 11990.04                                                                          |
|                               |                      |                          |               | <b>Temperature (degree C)</b> | 27.000                                                                            |

Sat2av2#051.001.001.11r.esp

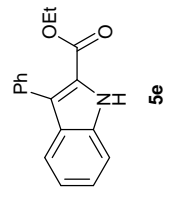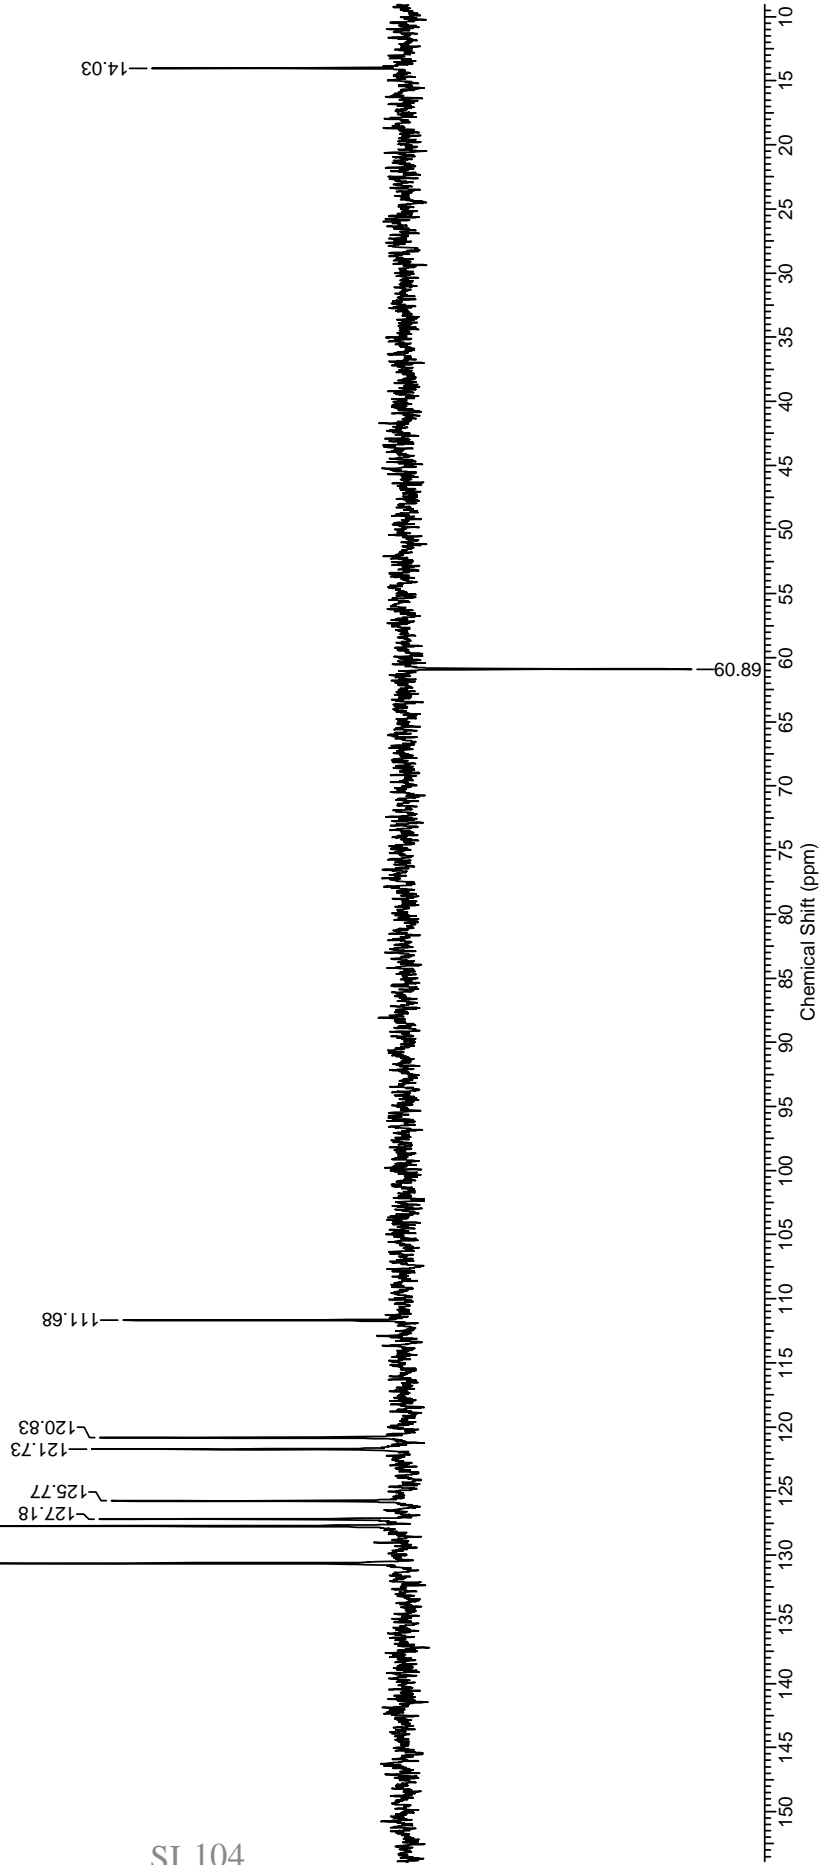



D:\Data\YM-995

9/16/2013 12:57:42 PM

YM-995 #1109 RT: 4.94 AV: 1 NL: 1.51E9  
T: FTMS + p ESI Full ms [100.00-700.00]

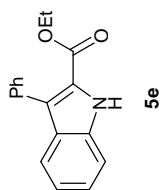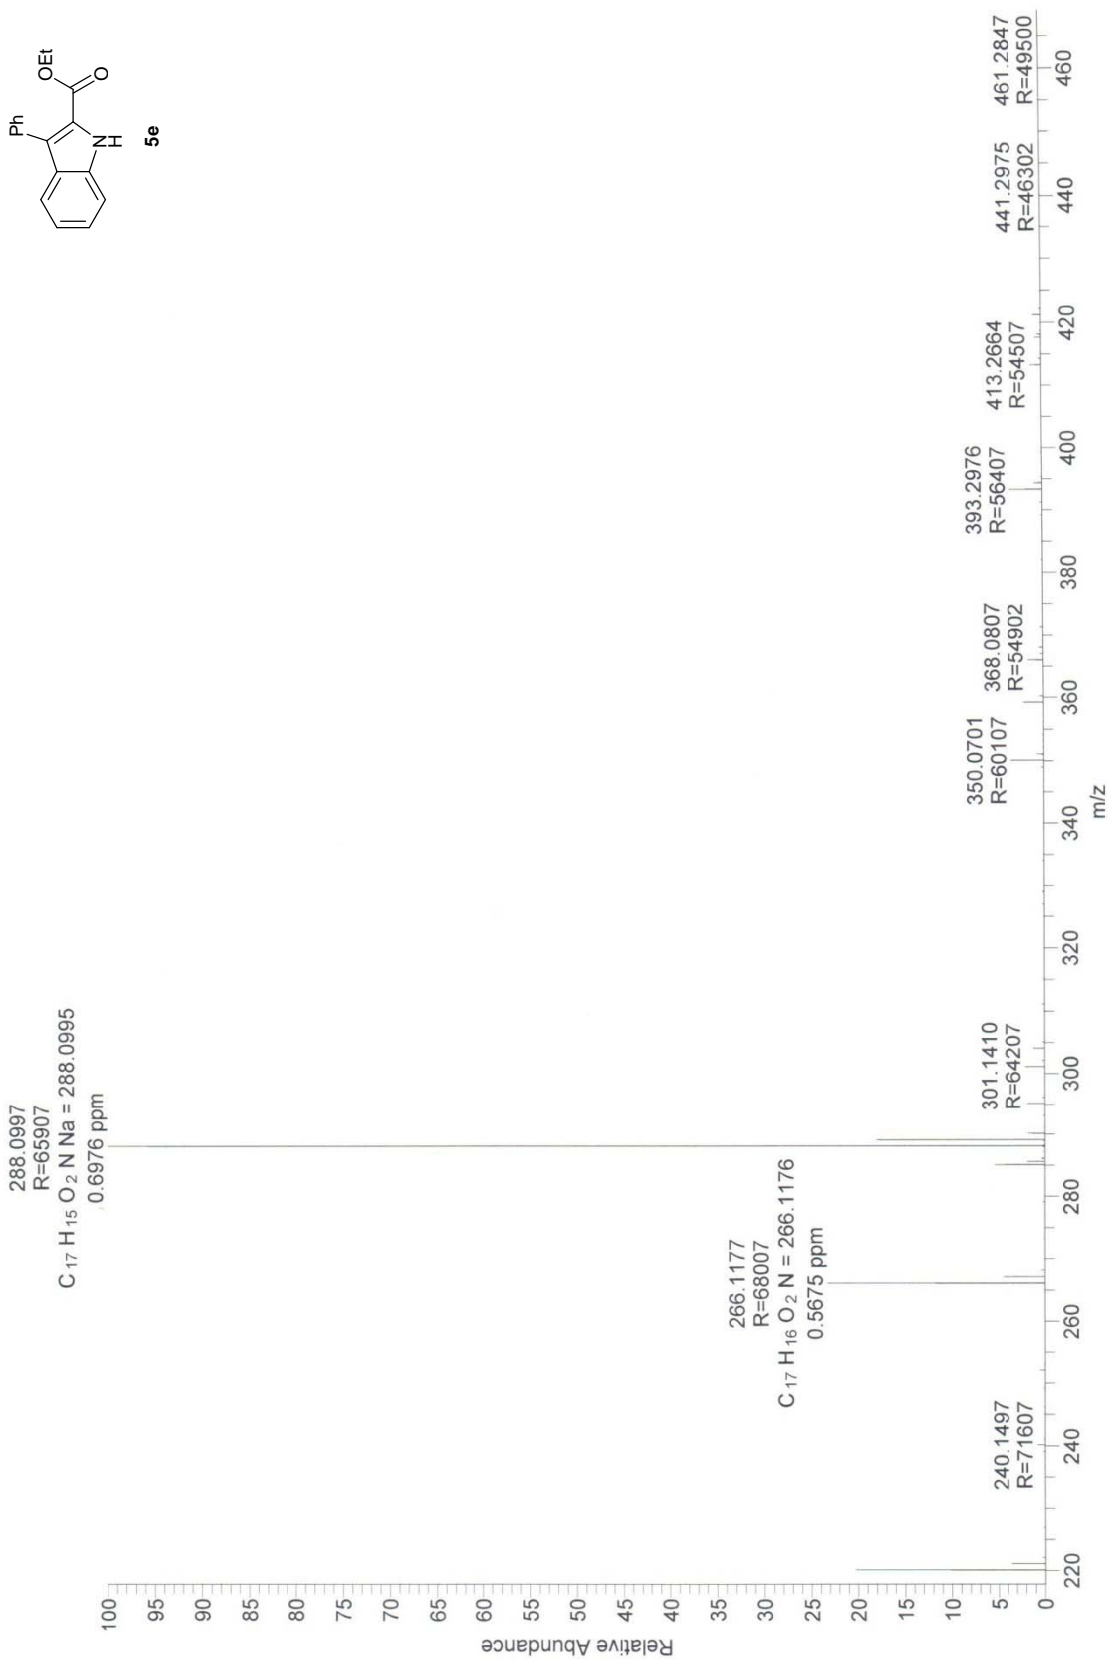



|                        |                      |                   |          |                        |                                                             |
|------------------------|----------------------|-------------------|----------|------------------------|-------------------------------------------------------------|
| Acquisition Time (sec) | 0.6488               | Comment           | 13C      | Date                   | 18 Feb 2014 16:49:12                                        |
| Date Stamp             | 18 Feb 2014 16:49:12 | Nucleus           | 13C      | File Name              | \\agn\nmr_data\400\400\Feb_14_400\Tue4v400#007\3\PDATA\1\1r |
| Frequency (MHz)        | 100.61               | Owner             | root     | Number of Transients   | 1046                                                        |
| Original Points Count  | 16384                | SW(cyclical) (Hz) | 25252.53 | Points Count           | 32768                                                       |
| Receiver Gain          | 2050.00              | Spectrum Type     | STANDARD | Pulse Sequence         | zpgg                                                        |
| Spectrum Offset (Hz)   | 9632.5684            |                   |          | Solvent                | CHLOROFORM-d                                                |
|                        |                      |                   |          | Sweep Width (Hz)       | 25251.75                                                    |
|                        |                      |                   |          | Temperature (degree C) | 22.700                                                      |

Tue4v400#007.003.001.1r.esp

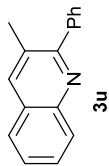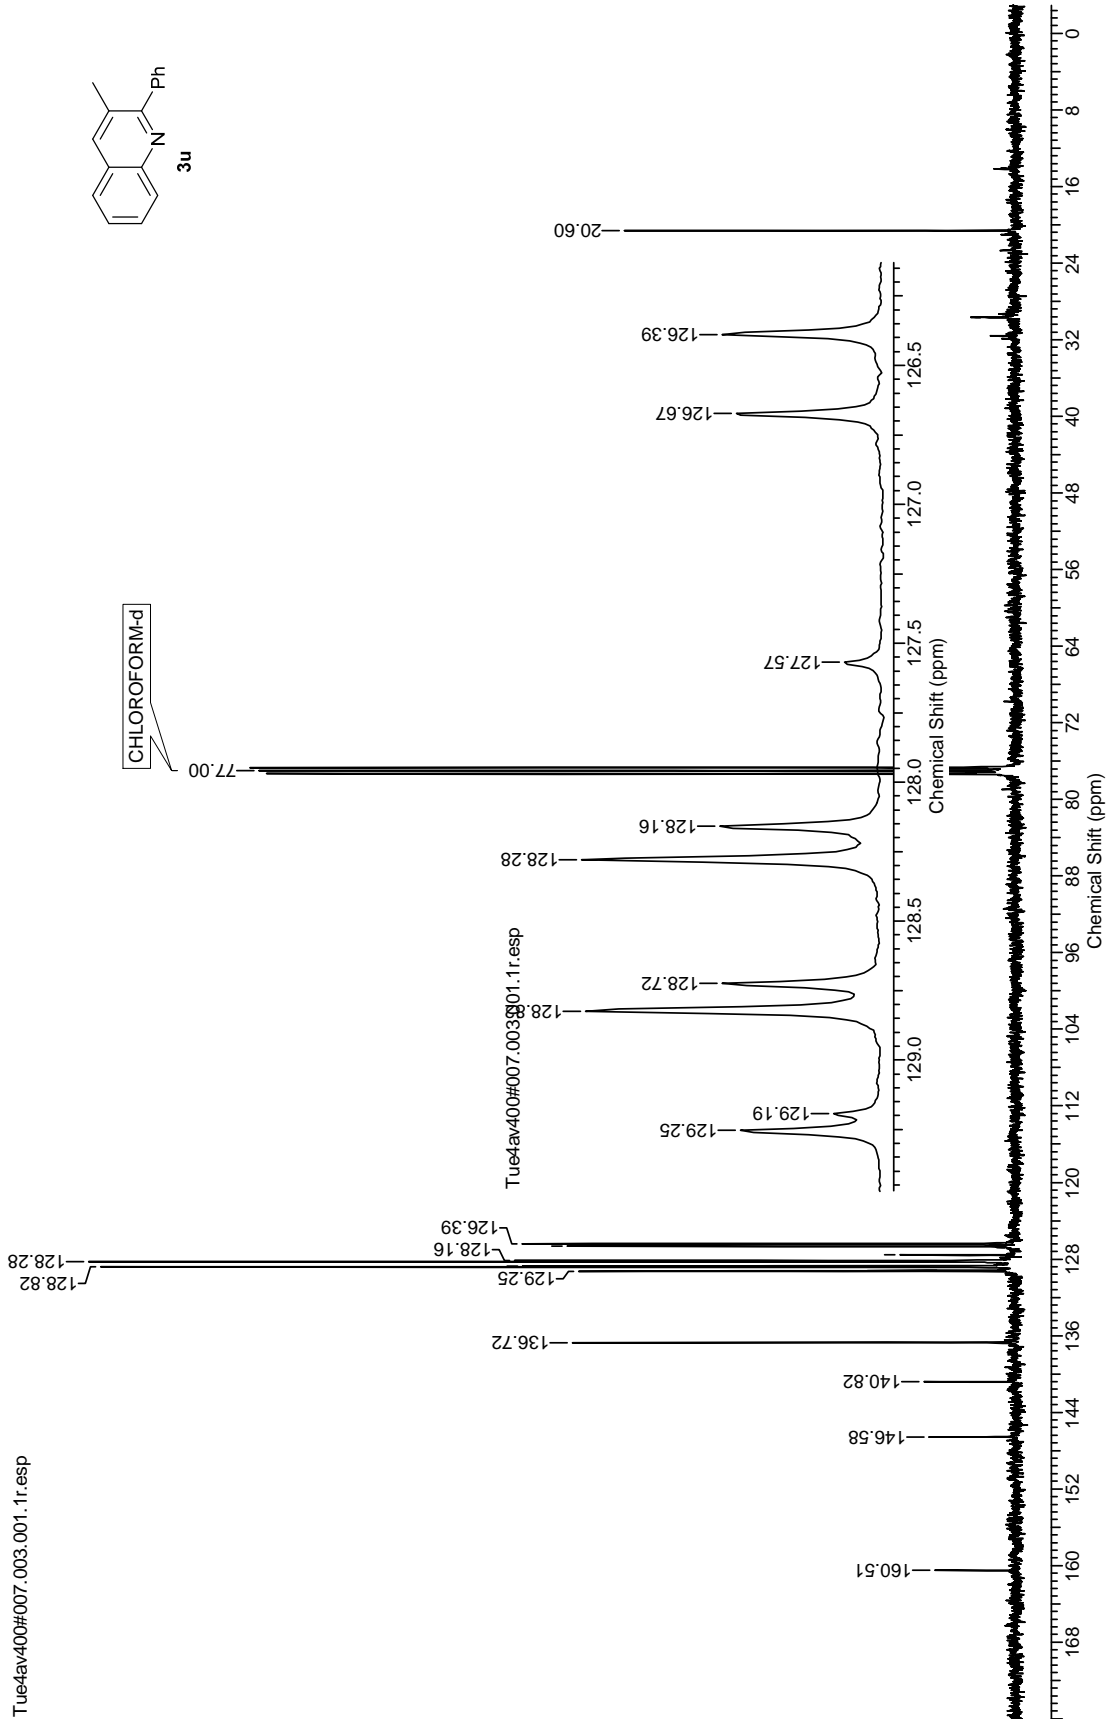



|                               |                      |                      |               |                             |                             |
|-------------------------------|----------------------|----------------------|---------------|-----------------------------|-----------------------------|
| <b>Acquisition Time (sec)</b> | 3.9584               | <b>Comment</b>       | Yogesh        | <b>Date</b>                 | 12 Mar 2014 17:23:20        |
| <b>Date Stamp</b>             | 12 Mar 2014 17:23:20 | <b>Nucleus</b>       | 1H            | <b>File Name</b>            | K:\Wed3av2#041\1\PDATA\1\1r |
| <b>Frequency (MHz)</b>        | 200.13               | <b>Owner</b>         | Administrator | <b>Number of Transients</b> | 8                           |
| <b>Original Points Count</b>  | 16384                | <b>Receiver Gain</b> | 724.10        | <b>Points Count</b>         | 32768                       |
| <b>Pulse Sequence</b>         | zg30                 | <b>Spectrum Type</b> | STANDARD      | <b>Solvent</b>              | CHLOROFORM-d                |
| <b>Spectrum Offset (Hz)</b>   | 1225.6606            |                      |               | <b>SW(cyclical) (Hz)</b>    | 4139.07                     |
| <b>Temperature (degree C)</b> | 27.000               |                      |               | <b>Sweep Width (Hz)</b>     | 4138.95                     |

Wed3av2#041.001.001.1r.esp

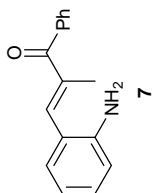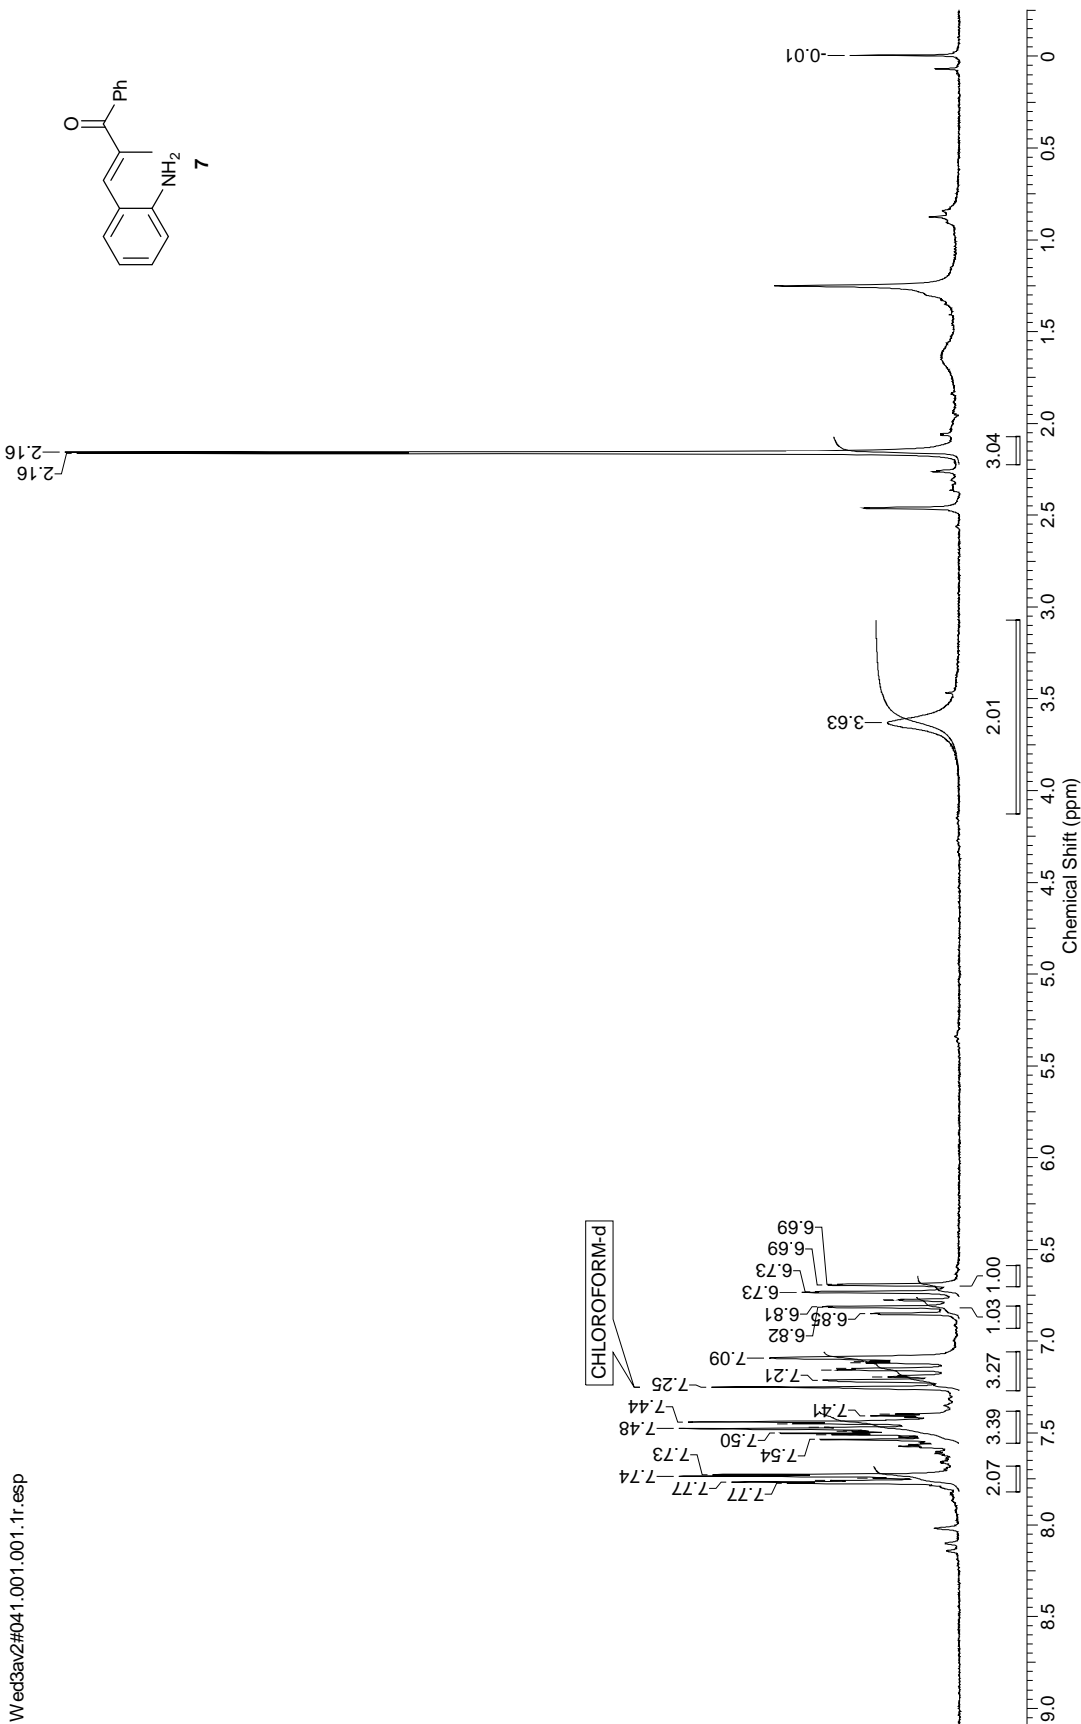

|                               |                      |                         |                                           |                               |                      |
|-------------------------------|----------------------|-------------------------|-------------------------------------------|-------------------------------|----------------------|
| <b>Acquisition Time (sec)</b> | 1.0434               | <b>Comment</b>          | yogesh.goria                              | <b>Date</b>                   | 16 Mar 2014 01:25:29 |
| <b>Date Stamp</b>             | 16 Mar 2014 00:36:06 | <b>File Name</b>        | K:\Fr3ECX400#043_MAR_14_2014_CARBON-3.jdf | <b>Origin</b>                 | ECX 400              |
| <b>Frequency (MHz)</b>        | 100.53               | <b>Nucleus</b>          | 13C                                       | <b>Pulse Sequence</b>         | single_pulse_dec     |
| <b>Original Points Count</b>  | 26214                | <b>Owner</b>            | delta                                     | <b>Spectrum Offset (Hz)</b>   | 10039.3311           |
| <b>Receiver Gain</b>          | 60.00                | <b>Solvent</b>          | CHLOROFORM-d                              | <b>Temperature (degree C)</b> | 22.900               |
| <b>Spectrum Type</b>          | STANDARD             | <b>Sweep Width (Hz)</b> | 25124.29                                  |                               |                      |

Fr3ECX400#043\_MAR\_14\_2014\_CARBON-3.esp

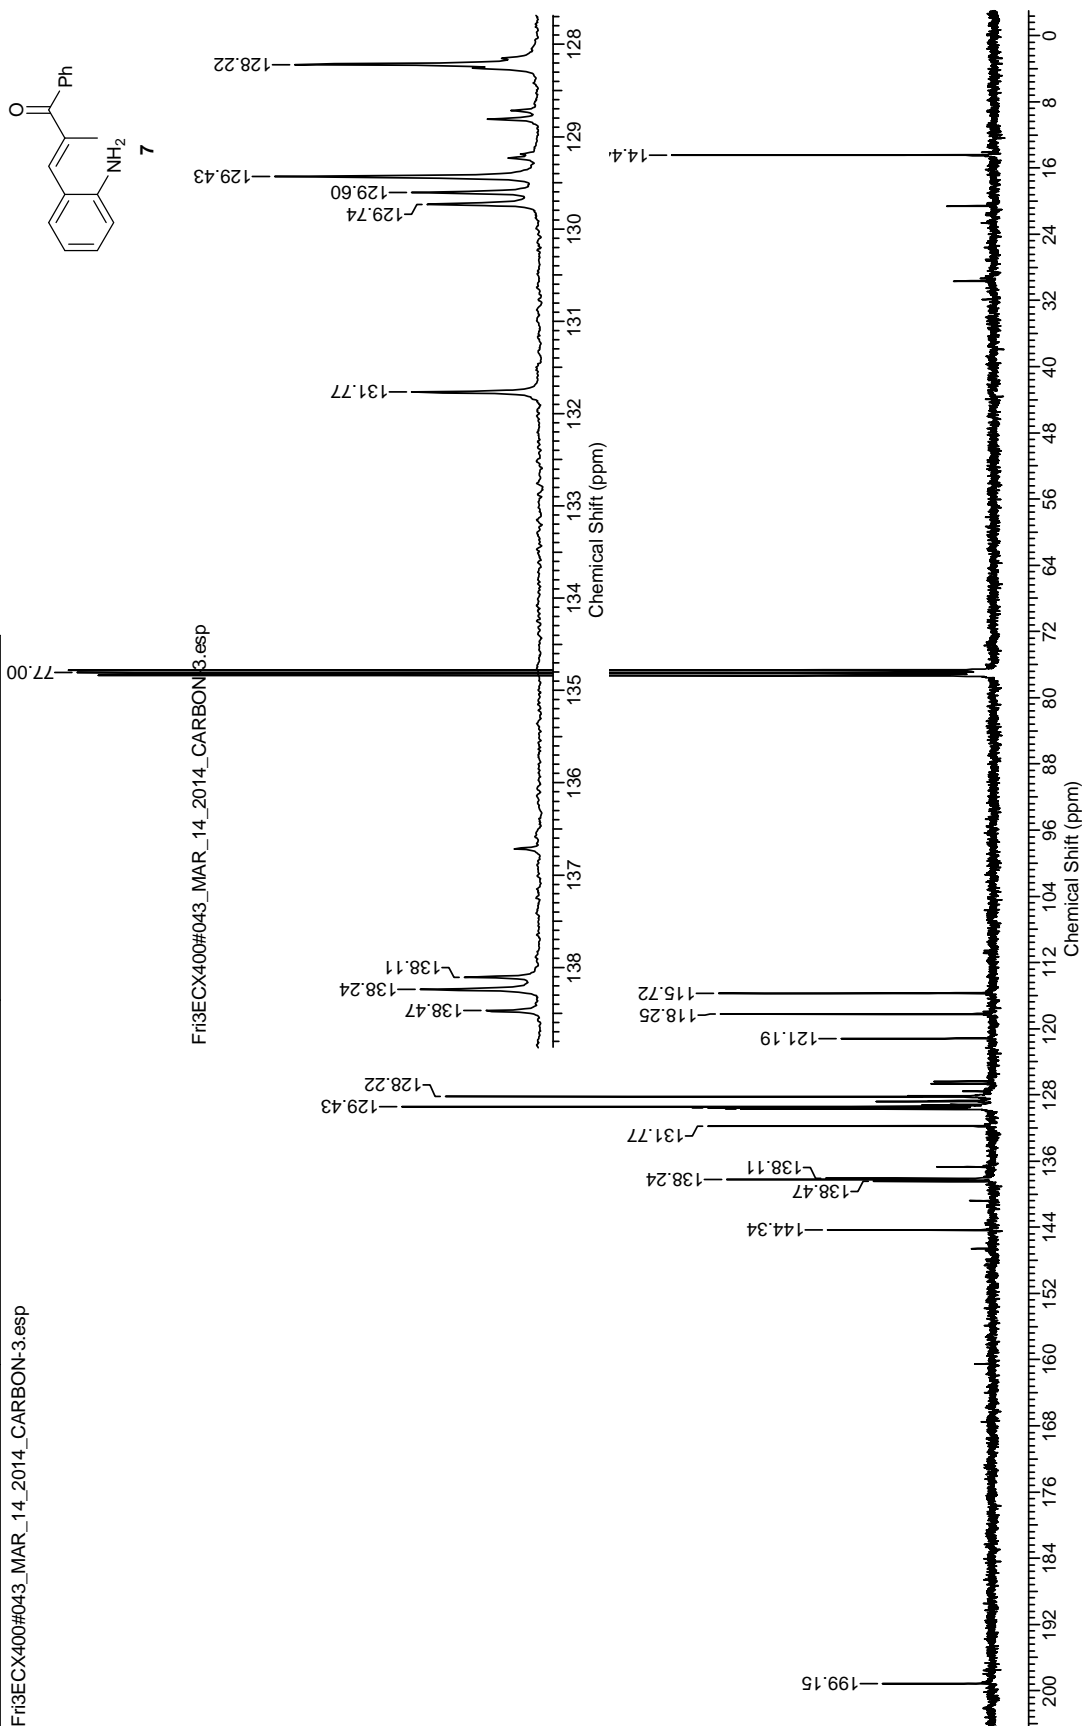

|                               |                      |                         |                                            |                               |                                |
|-------------------------------|----------------------|-------------------------|--------------------------------------------|-------------------------------|--------------------------------|
| <b>Acquisition Time (sec)</b> | 1.0434               | <b>Comment</b>          | yogesh goria                               | <b>Date</b>                   | 16 Mar 2014 01:25:29           |
| <b>Date Stamp</b>             | 16 Mar 2014 00:48:10 | <b>File Name</b>        | K:\Fr3ECX400#043_MAR_14_2014_DEPT135-3.jdf | <b>Origin</b>                 | ECX 400                        |
| <b>Frequency (MHz)</b>        | 100.53               | <b>Nucleus</b>          | <sup>13</sup> C                            | <b>Pulse Sequence</b>         | dept.ex2 (selection_angle=135) |
| <b>Original Points Count</b>  | 26214                | <b>Owner</b>            | delta                                      | <b>Spectrum Offset (Hz)</b>   | 10038.3789                     |
| <b>Receiver Gain</b>          | 60.00                | <b>Solvent</b>          | CHLOROFORM-d                               | <b>Temperature (degree C)</b> | 22.800                         |
| <b>Spectrum Type</b>          | DEPT135              | <b>Sweep Width (Hz)</b> | 25124.29                                   |                               |                                |

Fr3ECX400#043\_MAR\_14\_2014\_DEPT135-3.esp

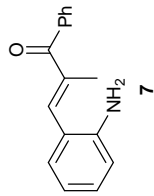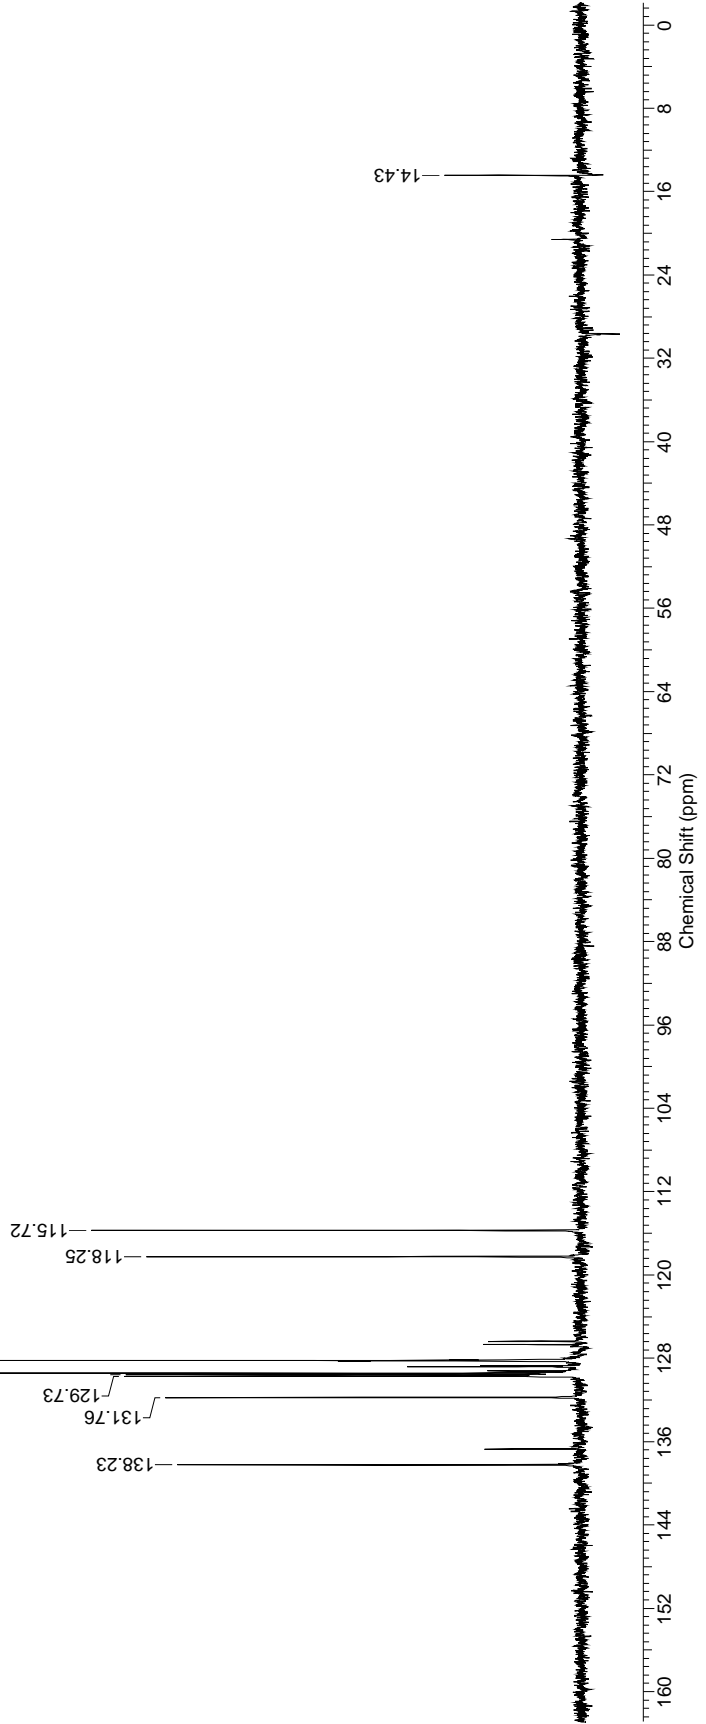

E:\Yogesh\2-Aroyl Indole\Indole metho\NMR\Propionate B\Fr3ECX400#043\_MAR\_14\_2014\_DEPT135-3.esp
